# Supplementary material for: Aurora kinase A localises to mitochondria to control organelle dynamics and energy production
Source: eLife journal article supplement (doi:10.7554/elife.38111), 2018-08-02
Supplement: supp [file elife-38111-supp-v1.zip]

Archive with 15 entries (15 files):
- elife_poa_e38111_Figure_1_figure_supplement_2.tif
- elife_poa_e38111_Transparent_Reporting_File.pdf
- elife_poa_e38111_Supplementary_File_3.xlsx
- elife_poa_e38111_Figure_1_figure_supplement_3.tif
- elife_poa_e38111_Supplementary_File_6.xlsx
- elife_poa_e38111_Supplementary_File_2.xlsx
- elife_poa_e38111_Supplementary_File_4.xlsx
- elife_poa_e38111_Figure_3_figure_supplement_3.tif
- elife_poa_e38111_Supplementary_File_1.xlsx
- elife_poa_e38111_Supplementary_File_5.xlsx
- elife_poa_e38111_Figure_3_figure_supplement_1.tif
- elife_poa_e38111_Figure_1_figure_supplement_1.tif
- elife_poa_e38111_Supplementary_File_7.xlsx
- elife_poa_e38111_Figure_5_figure_supplement_1.tif
- elife_poa_e38111_Figure_3_figure_supplement_2.tif
