# Supplementary material for: Aurora kinase A localises to mitochondria to control organelle dynamics and energy production
Source: eLife journal article supplement (doi:10.7554/elife.38111), 2018-08-02
Supplement: supp [file elife-38111-supp-v1.zip › elife_poa_e38111_Supplementary_File_1.xlsx]

## Sheet: Feuil1
Peptide	Mass (M+H)	Observed	Err (ppm)	Obs m/z	Peptide Start Position	Cleavage site	Cleavage	Score	Delta	DeltaMod	LogProb
C.ISGPVKATAPVGGPKR.V	1534.91	1534.91	0.6	512.307	9	9	NRagged	427.1	276.83	276.82	-5.26
C.ISGPVKATAPVGGPKR.V	1534.91	1534.91	0.1	767.957	9	9	NRagged	334.86	161.03	161.02	-3.88
C.ISGPVKATAPVGGPKR.V	1534.91	1534.9	-1.7	512.306	9	9	NRagged	381.9	240.97	240.96	-3.67
C.ISGPVKATAPVGGPKR.V	1534.91	1534.9	-1	512.307	9	9	NRagged	336.11	219.79	219.78	-3.4
S.GPVKATAPVGGPK.R	1178.69	1178.69	-0.3	589.848	11	11	NRagged	394.46	269.66	269.65	-4.6
L.VTQQFPC[+57.02146]QNPLPVNSGQAQR.V	2269.11	2269.12	0.4	757.043	27	27	NRagged	365.69	218.72	218.71	-4.56
L.VTQQFPC[+57.02146]QNPLPVNSGQAQR.V	2269.11	2269.11	-1.7	1135.06	27	27	NRagged	360.43	186.79	186.78	-3.82
Q.QFPC[+57.02146]QNPLPVNSGQAQR.V	1940.94	1940.94	0.2	970.974	30	30	NRagged	416.07	290.29	290.28	-6.54
Q.QFPC[+57.02146]QNPLPVNSGQAQR.V	1940.94	1940.94	0	970.973	30	30	NRagged	434.93	266.79	266.78	-6.29
K.RVLVTQQF.P	990.573	990.573	0	495.79	24	31	CRagged	344.64	140.81	140.8	-3.77
K.RVLVTQQFP.C	1087.63	1087.63	0.2	544.317	24	32	CRagged	351.1	110.73	110.72	-3.29
R.VLVTQQFPC[+57.02146].Q	1091.56	1091.55	-1.5	546.28	25	33	CRagged	395.6	172.85	172.84	-3.71
C.QNPLPVN[+0.98402]SGQAQR.V	1409.71	1409.71	-0.9	705.36	34	34	NRagged	407.81	114.97	53.19	-3.61
C.QNPLPVNSGQAQR.V	1408.73	1408.73	0.2	704.868	34	34	NRagged	452.21	249	248.99	-6.06
C.QNPLPVNSGQAQR.V	1408.73	1408.73	-0.2	704.868	34	34	NRagged	427.29	296.06	296.05	-5.78
C.QNPLPVNSGQAQR.V	1408.73	1408.73	-0.2	704.868	34	34	NRagged	472.77	341.32	341.31	-5.76
C.QNPLPVNSGQAQR.V	1408.73	1408.73	0.4	704.869	34	34	NRagged	432.72	241.87	241.86	-5.67
C.QNPLPVNSGQAQR.V	1408.73	1408.73	0.1	704.868	34	34	NRagged	311.64	138.35	138.34	-3.39
N.PLPVNSGQAQR.V	1166.63	1166.63	-0.4	583.817	36	36	NRagged	441.15	254.92	254.91	-5.76
N.PLPVNSGQAQR.V	1166.63	1166.63	0.1	583.817	36	36	NRagged	419.03	212.78	212.77	-5.4
N.PLPVNSGQAQR.V	1166.63	1166.63	-1.1	583.817	36	36	NRagged	433.79	267.15	267.14	-5.14
N.PLPVNSGQAQR.V	1166.63	1166.63	0.2	583.818	36	36	NRagged	391.88	220.33	220.32	-5.14
N.PLPVNSGQAQR.V	1166.63	1166.63	-0.3	583.817	36	36	NRagged	350.31	177.08	177.07	-4.29
N.PLPVNSGQAQR.V	1166.63	1166.63	1.1	583.818	36	36	NRagged	352.55	140.83	140.82	-4.05
K.RVLVTQQFPC[+57.02146]QNPLPVN.S	2010.06	2010.06	0	1005.53	24	40	CRagged	391.64	190.71	190.7	-5.52
K.RVLVTQQFPC[+57.02146]QNPLPVN.S	2010.06	2010.06	-0.9	1005.53	24	40	CRagged	312.77	170.61	170.6	-3.91
K.RVLVTQQFPC[+57.02146]QNPLPVN.S	2010.06	2010.06	0.3	1005.53	24	40	CRagged	222.6	141.34	141.33	-3.51
R.VLVTQQFPC[+57.02146]QNPLPVN.S	1853.96	1853.96	0.1	927.483	25	40	CRagged	367.17	164.77	164.76	-4.42
N.SSQRVPLQAQK.L	1241.7	1241.7	0.2	621.352	53	53	NRagged	479.82	257.6	257.59	-5.29
A.Q[-17.02655]KLVSSHKPVQNQK.Q	1603.89	1603.89	0	535.302	62	62	NRagged	512.19	353.54	353.53	-4.86
A.Q[-17.02655]KLVSSHKPVQNQK.Q	1603.89	1603.89	-0.2	535.302	62	62	NRagged	407.6	278.38	278.37	-4.53
A.Q[-17.02655]KLVSSHKPVQNQK.Q	1603.89	1603.89	0.4	802.45	62	62	NRagged	445.87	295.54	295.53	-4.39
A.Q[-17.02655]KLVSSHKPVQNQK.Q	1603.89	1603.89	0.3	802.45	62	62	NRagged	511.86	321.69	321.68	-4.3
A.Q[-17.02655]KLVSSHKPVQNQK.Q	1603.89	1603.89	0.4	802.45	62	62	NRagged	442.16	284.91	284.9	-4.29
L.QATSVPHPVSR.P	1178.63	1178.63	-0.3	589.817	80	80	NRagged	460.31	271.28	271.27	-5.45
L.QATSVPHPVSR.P	1178.63	1178.63	-0.5	393.547	80	80	NRagged	405.5	294.62	294.61	-5.35
L.QATSVPHPVSR.P	1178.63	1178.63	-0.3	589.817	80	80	NRagged	468.43	286.38	286.37	-5.35
L.QATSVPHPVSR.P	1178.63	1178.63	0	589.817	80	80	NRagged	359.66	229.13	229.12	-4.25
L.QATSVPHPVSRPLNNTQK.S	1974.05	1974.05	0.9	987.53	80	80	NRagged	339.63	242.46	242.45	-4.5
L.QATSVPHPVSRPLNNTQK.S	1974.05	1974.05	0.5	658.689	80	80	NRagged	285.35	227.04	227.03	-4.03
Q.ATSVPHPVSR.P	1050.57	1050.57	0.1	525.788	81	81	NRagged	468.63	222.86	222.85	-5.79
Q.ATSVPHPVSR.P	1050.57	1050.57	0.3	525.788	81	81	NRagged	464.32	237.14	237.13	-5.63
Q.ATSVPHPVSR.P	1050.57	1050.57	-0.5	525.788	81	81	NRagged	487.34	219.45	219.44	-5.47
Q.ATSVPHPVSR.P	1050.57	1050.57	0.1	525.788	81	81	NRagged	458.87	260.75	260.74	-5.46
Q.ATSVPHPVSR.P	1050.57	1050.57	-0.4	525.788	81	81	NRagged	489.06	236.34	236.33	-4.82
Q.ATSVPHPVSR.P	1050.57	1050.57	0.4	350.861	81	81	NRagged	357.51	175.51	175.5	-4.66
Q.ATSVPHPVSRPLN[+0.98402]NTQK.S	1846.98	1846.98	-0.3	923.992	81	81	NRagged	376.5	253.79	20.86	-4.64
Q.ATSVPHPVSRPLNNTQK.S	1845.99	1845.99	0.1	923.5	81	81	NRagged	388.69	275.22	275.21	-5.48
Q.ATSVPHPVSRPLNNTQK.S	1845.99	1845.99	-0.1	923.5	81	81	NRagged	389.71	309.34	309.33	-5.27
Q.ATSVPHPVSRPLNNTQK.S	1845.99	1845.99	0.3	923.5	81	81	NRagged	363.47	271.02	271.01	-5.15
Q.ATSVPHPVSRPLNNTQK.S	1845.99	1845.99	0.9	923.501	81	81	NRagged	350.78	241.72	241.71	-4.8
Q.ATSVPHPVSRPLNNTQK.S	1845.99	1845.99	-0.3	923.5	81	81	NRagged	312.1	188.66	188.65	-4.57
Q.ATSVPHPVSRPLNNTQK.S	1845.99	1845.99	0.2	616.003	81	81	NRagged	253.85	188.9	188.89	-3.6
A.TSVPHPVSR.P	979.532	979.532	-0.2	490.269	82	82	NRagged	461.8	270.07	270.06	-5.54
A.TSVPHPVSR.P	979.532	979.532	0	490.27	82	82	NRagged	485.1	282.9	282.89	-5.09
A.TSVPHPVSR.P	979.532	979.532	0.2	490.27	82	82	NRagged	418.82	228.96	228.95	-4.91
A.TSVPHPVSR.P	979.532	979.532	0.1	490.27	82	82	NRagged	392.86	197.86	197.85	-4.78
A.TSVPHPVSRPLNNTQK.S	1774.96	1774.96	0.2	887.982	82	82	NRagged	319.73	198.35	198.34	-4.58
A.TSVPHPVSRPLNNTQK.S	1774.96	1774.96	0	887.982	82	82	NRagged	306.6	229.23	229.22	-4.31
A.TSVPHPVSRPLNNTQK.S	1774.96	1774.96	-0.1	887.981	82	82	NRagged	288.08	159.64	159.63	-4.02
A.TSVPHPVSRPLNNTQK.S	1774.96	1774.96	0.1	887.982	82	82	NRagged	271.09	100.5	100.49	-3.16
A.TSVPHPVSRPLNNTQK.S	1774.96	1774.96	0.2	592.324	82	82	NRagged	233.85	193.86	193.85	-3.08
T.SVPHPVSRPLNNTQK.S	1673.91	1673.91	-0.2	837.457	83	83	NRagged	371.01	195.2	195.19	-4.83
T.SVPHPVSRPLNNTQK.S	1673.91	1673.91	0.1	837.458	83	83	NRagged	355	177.06	177.05	-4.65
T.SVPHPVSRPLNNTQK.S	1673.91	1673.91	0.4	837.458	83	83	NRagged	349.29	157.52	157.51	-4.54
T.SVPHPVSRPLNNTQK.S	1673.91	1673.91	0.2	837.458	83	83	NRagged	355.24	165.98	165.97	-4.41
T.SVPHPVSRPLNNTQK.S	1673.91	1673.91	0.1	837.458	83	83	NRagged	365.38	97.68	97.67	-3.97
T.SVPHPVSRPLNNTQK.S	1673.91	1673.91	-0.4	558.641	83	83	NRagged	277.11	186.84	186.83	-3.62
K.QLQATSVPH.P	980.516	980.516	0.2	490.762	78	86	CRagged	444.97	178.12	178.11	-5.53
H.PVSRPLNNTQK.S	1253.7	1253.7	0	627.352	87	87	NRagged	427.82	152.35	152.34	-5.16
K.QLQATSVPHPV.S	1176.64	1176.64	-0.5	588.822	78	88	CRagged	416.33	193.53	193.52	-4.72
K.QLQATSVPHPV.S	1176.64	1176.63	-2	588.821	78	88	CRagged	445.11	153.01	153	-4.63
K.QLQATSVPHPVS.R	1263.67	1263.67	0.3	632.338	78	89	CRagged	363.32	168.14	168.13	-4.42
K.QLQATSVPHPVS.R	1263.67	1263.67	-0.6	632.338	78	89	CRagged	346.53	144.72	144.71	-3.63
K.Q[-17.02655]KQLQATSVPHPVSRPL.N	1869.03	1869.03	-0.3	935.02	76	92	CRagged	405.43	215.7	215.69	-5.37
K.Q[-17.02655]KQLQATSVPHPVSRPL.N	1869.03	1869.03	-0.5	935.02	76	92	CRagged	394.36	215.64	215.63	-4.42
K.Q[-17.02655]LQATSVPHPVSRPL.N	1612.88	1612.88	-2	806.942	78	92	CRagged	423.26	252.75	252.74	-5.23
K.Q[-17.02655]LQATSVPHPVSRPL.N	1612.88	1612.88	0.4	806.944	78	92	CRagged	381.98	222.77	222.76	-4.64
K.Q[-17.02655]LQATSVPHPVSRPL.N	1612.88	1612.88	0.5	806.944	78	92	CRagged	386.14	221.95	221.94	-4.32
K.QKQLQATSVPHPVSRPL.N	1886.06	1886.06	1.7	943.536	76	92	CRagged	432.3	264.13	264.12	-5.56
K.QLQATSVPHPVSRPL.N	1629.91	1629.91	0.3	815.457	78	92	CRagged	489.57	259.56	259.55	-6.5
K.QLQATSVPHPVSRPL.N	1629.91	1629.91	0.3	543.974	78	92	CRagged	258.39	181.19	181.18	-3.39
K.QLQATSVPHPVSRPL.N	1629.91	1629.91	0.2	543.974	78	92	CRagged	232.75	150.85	150.84	-3.17
K.Q[-17.02655]LQATSVPHPVSRPLN.N	1726.92	1726.92	-1	863.965	78	93	CRagged	365.88	230.01	230	-4.07
K.Q[-17.02655]LQATSVPHPVSRPLN.N	1726.92	1726.92	0.3	863.966	78	93	CRagged	320.71	248.17	248.16	-3.95
K.QLQATSVPHPVSRPLN.N	1743.95	1743.95	-0.3	872.478	78	93	CRagged	338.06	199.09	199.08	-4.22
K.QLQATSVPHPVSRPLN.N	1743.95	1743.95	0.3	581.988	78	93	CRagged	245.78	205.79	205.78	-3.79
K.QLQATSVPHPVSRPLN.N	1743.95	1743.95	0.6	872.479	78	93	CRagged	241.92	139.87	139.86	-3.3
K.Q[-17.02655]LQATSVPHPVSRPLNN.T	1840.97	1840.97	0.3	920.987	78	94	CRagged	376.44	254.69	254.68	-4.47
K.Q[-17.02655]LQATSVPHPVSRPLNN.T	1840.97	1840.97	0.2	920.987	78	94	CRagged	307.88	255.34	255.33	-3.98
K.Q[-17.02655]LQATSVPHPVSRPLNN.T	1840.97	1840.97	0.3	920.987	78	94	CRagged	302.58	184.69	184.68	-3.83
K.QLQATSVPHPVSRPLNN.T	1857.99	1857.99	0.2	620.003	78	94	CRagged	326.86	270.54	270.53	-4.46
K.Q[-17.02655]LQATSVPHPVSRPLNNTQ.K	2070.07	2070.07	0	1035.54	78	96	CRagged	405.65	253.03	253.02	-4.79
K.QLQATSVPHPVSRPLNNTQ.K	2087.1	2087.1	-0.1	696.371	78	96	CRagged	391.27	277.87	277.86	-5.41
K.QLQATSVPHPVSRPLNNTQ.K	2087.1	2087.1	1	696.372	78	96	CRagged	391.79	260.82	260.81	-4.79
K.QLQATSVPHPVSRPLNNTQ.K	2087.1	2087.1	1.8	1044.06	78	96	CRagged	380.86	233.35	233.34	-4.48
S.KQPLPSAPENNPEEELASK.Q	2078.04	2078.04	1.7	693.353	99	99	NRagged	285.31	212.7	212.69	-3.96
Q.PLPSAPENNPEEELASK.Q	1821.89	1821.89	0.5	911.447	101	101	NRagged	309.71	165.34	165.33	-4.64
P.LPSAPENNPEEELASK.Q	1724.83	1724.83	-0.1	862.92	102	102	NRagged	396.47	285.81	285.8	-5.6
P.LPSAPENNPEEELASK.Q	1724.83	1724.83	0.4	862.921	102	102	NRagged	358.43	195.34	195.33	-5.05
P.LPSAPENNPEEELASK.Q	1724.83	1724.84	1	862.921	102	102	NRagged	374.33	162.28	162.27	-4.97
P.LPSAPENNPEEELASK.Q	1724.83	1724.83	0.4	862.921	102	102	NRagged	329.21	231.57	231.56	-4.71
P.LPSAPENNPEEELASK.Q	1724.83	1724.83	0.5	862.921	102	102	NRagged	323.6	153.2	153.19	-3.98
K.SKQPLPSAPEN.N	1167.6	1167.6	-1.3	584.303	98	108	CRagged	393.22	165.38	165.37	-4.14
K.SKQPLPSAPEN.N	1167.6	1167.6	0.3	584.304	98	108	CRagged	348.07	170.16	170.15	-3.86
K.SKQPLPSAPENN.P	1281.64	1281.64	0.6	641.326	98	109	CRagged	348.05	141	140.99	-3.65
K.SKQPLPSAPENNPEE.E	1636.78	1636.78	0.7	818.895	98	112	CRagged	312.36	210.31	210.3	-3.79
Q.WALEDFEIGRPLGK.G	1630.86	1630.86	0.2	544.291	128	128	NRagged	365.06	308.31	308.3	-5.34
Q.WALEDFEIGRPLGK.G	1630.86	1630.86	-2	815.931	128	128	NRagged	372.67	164.01	164	-4.2
Q.WALEDFEIGRPLGK.G	1630.86	1630.86	0.3	544.291	128	128	NRagged	271.78	227.61	227.6	-4.01
W.ALEDFEIGRPLGK.G	1444.78	1444.78	0.4	722.894	129	129	NRagged	506.78	236.5	236.49	-5.64
W.ALEDFEIGRPLGK.G	1444.78	1444.78	0.5	722.894	129	129	NRagged	441.54	230.35	230.34	-5.64
W.ALEDFEIGRPLGK.G	1444.78	1444.78	1	722.894	129	129	NRagged	458.57	247.14	247.13	-5.45
W.ALEDFEIGRPLGK.G	1444.78	1444.78	0.8	722.894	129	129	NRagged	451.47	244	243.99	-5.45
W.ALEDFEIGRPLGK.G	1444.78	1444.78	0.3	722.894	129	129	NRagged	489.75	300.5	300.49	-5.4
W.ALEDFEIGRPLGK.G	1444.78	1444.78	0.1	722.893	129	129	NRagged	378.82	224.95	224.94	-4.56
W.ALEDFEIGRPLGK.G	1444.78	1444.78	0.2	482.265	129	129	NRagged	272.55	209.21	209.2	-3.78
W.ALEDFEIGRPLGK.G	1444.78	1444.78	0	482.265	129	129	NRagged	310.77	182.75	182.74	-3.67
W.ALEDFEIGRPLGK.G	1444.78	1444.78	-1	482.264	129	129	NRagged	294.28	172.87	172.86	-3.29
A.LEDFEIGRPLGK.G	1373.74	1373.74	0.8	687.375	130	130	NRagged	446.28	195.67	195.66	-5.37
A.LEDFEIGRPLGK.G	1373.74	1373.74	0.3	687.375	130	130	NRagged	434.57	222.84	222.83	-5.24
A.LEDFEIGRPLGK.G	1373.74	1373.74	1.5	687.376	130	130	NRagged	457.02	182.92	182.91	-4.81
A.LEDFEIGRPLGK.G	1373.74	1373.74	1	687.375	130	130	NRagged	421.44	139.98	139.97	-4.78
A.LEDFEIGRPLGK.G	1373.74	1373.74	1.6	687.376	130	130	NRagged	456	156.29	156.28	-4.7
A.LEDFEIGRPLGK.G	1373.74	1373.74	-0.3	687.375	130	130	NRagged	399.65	170.46	170.45	-4.44
E.DFEIGRPLGK.G	1131.62	1131.62	-0.1	566.311	132	132	NRagged	341.28	148.95	148.94	-3.6
R.QWALEDFEIGRP.L	1460.72	1460.72	-0.2	730.862	127	138	CRagged	393.8	187.97	187.96	-4.89
R.QWALEDFEIGRP.L	1460.72	1460.72	-0.7	730.861	127	138	CRagged	384.29	170.98	170.97	-4.4
R.QWALEDFEIGRPL.G	1573.8	1573.8	0.5	787.404	127	139	CRagged	372.12	133.1	133.09	-3.69
R.QWALEDFEIGRPLG.K	1630.82	1630.82	1.2	815.916	127	140	CRagged	357.08	231.07	231.06	-4.39
R.QWALEDFEIGRPLG.K	1630.82	1630.82	0.9	815.915	127	140	CRagged	351.91	169.44	169.43	-3.99
K.RQWALEDFEIGRPLGKG.K	1972.04	1972.04	-0.4	658.018	126	142	CRagged	429.06	389.07	389.06	-6.59
K.RQWALEDFEIGRPLGKG.K	1972.04	1972.04	-0.6	493.765	126	142	CRagged	419.18	323.89	323.88	-5.13
K.RQWALEDFEIGRPLGKG.K	1972.04	1972.04	-0.7	658.018	126	142	CRagged	404.4	350.67	350.66	-4.66
K.RQWALEDFEIGRPLGKG.K	1972.04	1972.04	-0.1	493.765	126	142	CRagged	373.35	302.74	302.73	-4.57
K.RQWALEDFEIGRPLGKG.K	1972.04	1972.04	-0.4	658.018	126	142	CRagged	346.76	306.77	306.76	-3.95
R.Q[-17.02655]WALEDFEIGRPLGKG.K	1798.91	1798.91	0.6	899.96	127	142	CRagged	469.04	372.46	372.45	-4.75
R.Q[-17.02655]WALEDFEIGRPLGKG.K	1798.91	1798.91	1.5	899.961	127	142	CRagged	429.84	288.6	288.59	-4.13
R.QWALEDFEIGRPLGKG.K	1815.94	1815.94	1.8	908.475	127	142	CRagged	491.98	304.64	304.63	-5.34
R.QWALEDFEIGRPLGKG.K	1815.94	1815.94	0.9	908.474	127	142	CRagged	411.13	226.93	226.92	-4.78
R.QWALEDFEIGRPLGKG.K	1815.94	1815.94	-0.6	605.984	127	142	CRagged	372.4	294.98	294.97	-4.6
R.QWALEDFEIGRPLGKG.K	1815.94	1815.94	-0.3	605.984	127	142	CRagged	318.43	264.65	264.64	-3.94
F.KAQLEKAGVEHQLR.R	1606.9	1606.9	0.2	536.306	166	166	NRagged	355.47	211.97	211.96	-4.64
R.EVEIQSHLRHPN.I	1458.74	1458.74	0.2	729.876	181	192	CRagged	511.88	244.72	244.71	-5.79
R.EVEIQSHLRHPN.I	1458.74	1458.75	0.3	729.876	181	192	CRagged	475.16	194.61	194.6	-5.13
R.EVEIQSHLRHPN.I	1458.74	1458.75	0.8	729.877	181	192	CRagged	528.68	255.25	255.24	-4.8
L.YGYFHDATR.V	1129.51	1129.5	-1.5	565.256	197	197	NRagged	354.02	175.03	175.02	-3.71
L.YGYFHDATR.V	1129.51	1129.51	0	565.257	197	197	NRagged	329.58	182.83	182.82	-3.5
L.YGYFHDATR.V	1129.51	1129.51	-0.6	565.256	197	197	NRagged	338.8	185.38	185.37	-3.4
V.YLILEYAPLGTVYR.E	1670.92	1670.92	1.9	835.963	207	207	NRagged	371.5	219.58	219.57	-4.93
V.YLILEYAPLGTVYR.E	1670.92	1670.92	1.2	835.962	207	207	NRagged	321.11	166.49	166.48	-4.36
Y.LILEYAPLGTVYR.E	1507.85	1507.85	1.9	754.431	208	208	NRagged	421.66	227.45	227.44	-6.01
Y.LILEYAPLGTVYR.E	1507.85	1507.85	-0.5	754.429	208	208	NRagged	457.61	226.97	226.96	-5.85
Y.LILEYAPLGTVYR.E	1507.85	1507.85	1	754.43	208	208	NRagged	466.17	251.26	251.25	-5.85
Y.LILEYAPLGTVYR.E	1507.85	1507.85	1.5	754.431	208	208	NRagged	415.52	202.95	202.94	-5.17
L.ILEYAPLGTVYR.E	1394.77	1394.77	0.6	697.888	209	209	NRagged	397.75	130.7	130.69	-5.03
L.ILEYAPLGTVYR.E	1394.77	1394.77	0.1	697.888	209	209	NRagged	372.41	125.15	125.14	-4.84
L.ILEYAPLGTVYR.E	1394.77	1394.77	1.3	697.888	209	209	NRagged	344.44	130.85	130.84	-4.21
L.ILEYAPLGTVYR.E	1394.77	1394.77	-1.6	697.886	209	209	NRagged	349.5	125.21	125.2	-4.01
L.EYAPLGTVYR.E	1168.6	1168.6	0	584.803	211	211	NRagged	321.22	160.43	160.42	-3.84
L.EYAPLGTVYR.E	1168.6	1168.6	-1.6	584.803	211	211	NRagged	344.61	206.69	206.68	-3.47
R.VYLILEYAPLGT.V	1351.75	1351.75	-1.4	676.378	206	217	CRagged	330.29	166.33	166.32	-3.63
R.VYLILEYAPLGTVY.R	1613.88	1613.88	-1.3	807.444	206	219	CRagged	287.33	175.34	175.33	-3.61
R.VYLILEYAPLGTVYRE.L	1899.03	1899.03	0.9	950.018	206	221	CRagged	336.2	172.66	172.65	-4.02
R.VYLILEYAPLGTVYRE.L	1899.03	1899.03	1.7	950.018	206	221	CRagged	305.88	162.13	162.12	-3.53
R.VYLILEYAPLGTVYRE.L	1899.03	1899.03	0.8	950.018	206	221	CRagged	297.47	157.08	157.07	-3.34
R.TATYITELAN.A	1096.55	1096.55	-0.4	548.779	233	242	CRagged	389.9	184.49	184.48	-4.54
R.TATYITELANAL.S	1280.67	1280.67	0.3	640.841	233	244	CRagged	474.66	242.46	242.45	-5.95
R.TATYITELANAL.S	1280.67	1280.67	-0.2	640.84	233	244	CRagged	439.06	197.81	197.8	-5.71
R.TATYITELANAL.S	1280.67	1280.67	1.2	640.841	233	244	CRagged	408.15	181.42	181.41	-4.75
R.TATYITELANALSY.C	1530.77	1530.77	0.8	765.889	233	246	CRagged	418.12	256.33	256.32	-5.48
R.TATYITELANALSY.C	1530.77	1530.77	0.9	765.889	233	246	CRagged	369.01	231.3	231.29	-5.01
R.TATYITELANALSY.C	1530.77	1530.77	1.8	765.889	233	246	CRagged	361.33	203.67	203.66	-4.64
R.TATYITELANALSY.C	1530.77	1530.77	-1.6	765.887	233	246	CRagged	291.53	147.26	147.25	-3.28
R.TATYITELANALSYC[+57.02146]H.S	1827.86	1827.86	0.2	914.433	233	248	CRagged	541.93	388.88	388.87	-7.19
R.TATYITELANALSYC[+57.02146]H.S	1827.86	1827.86	-0.5	609.957	233	248	CRagged	495.54	353.96	353.95	-6.52
R.TATYITELANALSYC[+57.02146]H.S	1827.86	1827.86	0.1	609.958	233	248	CRagged	472.83	342.88	342.87	-6.03
R.TATYITELANALSYC[+57.02146]H.S	1827.86	1827.86	-0.2	609.957	233	248	CRagged	485.18	341.48	341.47	-5.87
R.TATYITELANALSYC[+57.02146]H.S	1827.86	1827.86	-0.4	609.957	233	248	CRagged	500.17	354.62	354.61	-5.82
R.TATYITELANALSYC[+57.02146]H.S	1827.86	1827.86	-0.4	914.432	233	248	CRagged	424.01	273.79	273.78	-5.82
H.RDIKPENLLLGSAGELK.I	1853.05	1853.05	-0.4	927.028	255	255	NRagged	390.49	193.3	193.29	-5.4
H.RDIKPENLLLGSAGELK.I	1853.05	1853.05	0.2	618.355	255	255	NRagged	299.87	242.25	242.24	-3.87
D.IKPENLLLGSAGELK.I	1581.92	1581.92	-0.1	791.464	257	257	NRagged	350.39	179.78	179.77	-4.96
D.IKPENLLLGSAGELK.I	1581.92	1581.92	0.6	527.979	257	257	NRagged	298.23	165.42	165.41	-3.36
I.KPENLLLGSAGELK.I	1468.84	1468.84	-0.5	490.284	258	258	NRagged	290.15	160.9	160.89	-4.12
I.KPENLLLGSAGELK.I	1468.84	1468.84	-1	490.283	258	258	NRagged	280.06	141.92	141.91	-3.82
P.ENLLLGSAGELK.I	1243.69	1243.69	0.3	622.348	260	260	NRagged	450.12	140.4	140.39	-5.79
P.ENLLLGSAGELK.I	1243.69	1243.69	0.1	622.348	260	260	NRagged	443.01	125.73	125.72	-5.62
N.LLLGSAGELK.I	1000.6	1000.6	-0.2	500.805	262	262	NRagged	378.24	70.39	70.38	-3.25
R.DIKPENLLLGSAGEL.K	1568.85	1568.85	-0.1	784.93	256	270	CRagged	317.29	136.08	136.07	-3.52
I.ADFGWSVHAPSSR.R	1416.67	1416.67	-0.1	708.836	273	273	NRagged	443.99	266.77	266.76	-5.47
I.ADFGWSVHAPSSR.R	1416.67	1416.67	-0.1	708.836	273	273	NRagged	492.57	270.41	270.4	-5.41
I.ADFGWSVHAPSSR.R	1416.67	1416.66	-0.3	472.893	273	273	NRagged	378.24	271.97	271.96	-4.71
I.ADFGWSVHAPSSR.R	1416.67	1416.67	0.1	472.893	273	273	NRagged	355.95	226.59	226.58	-4.67
I.ADFGWSVHAPSSR.R	1416.67	1416.66	-1.6	708.835	273	273	NRagged	412.86	262.98	262.97	-4.51
I.ADFGWSVHAPSSR.R	1416.67	1416.67	1.1	708.837	273	273	NRagged	408.44	267.06	267.05	-4.51
I.ADFGWSVHAPSSR.R	1416.67	1416.67	0.4	472.894	273	273	NRagged	346.37	231.86	231.85	-3.92
A.DFGWSVHAPSSR.R	1345.63	1345.63	-1.1	673.317	274	274	NRagged	394.11	214.76	214.75	-4.14
D.FGWSVHAPSSR.R	1230.6	1230.6	-0.4	615.804	275	275	NRagged	439.55	245.37	245.36	-5.24
D.FGWSVHAPSSR.R	1230.6	1230.6	1.5	615.805	275	275	NRagged	433.94	248.57	248.56	-5.14
D.FGWSVHAPSSR.R	1230.6	1230.6	0	410.872	275	275	NRagged	386.1	203.47	203.46	-4.88
D.FGWSVHAPSSR.R	1230.6	1230.6	-0.9	410.872	275	275	NRagged	354.18	213.94	213.93	-4.15
D.FGWSVHAPSSR.R	1230.6	1230.6	-0.9	410.872	275	275	NRagged	373.08	197.1	197.09	-3.97
D.FGWSVHAPSSR.R	1230.6	1230.6	-0.9	615.804	275	275	NRagged	333	165.81	165.8	-3.26
L.C[+57.02146]GTLDYLPPEMIEGR.M	1750.81	1750.81	-0.1	875.91	290	290	NRagged	325.06	132.98	132.97	-3.86
C.GTLDYLPPEMIEGR.M	1590.78	1590.79	1.9	795.897	291	291	NRagged	379.04	165.93	165.92	-4.49
C.GTLDYLPPEMIEGR.M	1590.78	1590.78	-1	795.894	291	291	NRagged	366.44	123.41	123.4	-4.44
C.GTLDYLPPEMIEGR.M	1590.78	1590.78	-0.7	795.895	291	291	NRagged	281.21	120.95	120.94	-3.3
F.LVGKPPFEANTYQETYKR.I	2141.1	2141.1	0.3	536.031	323	323	NRagged	294.45	225.01	225	-3.81
F.LVGKPPFEANTYQETYKR.I	2141.1	2141.1	-0.1	536.031	323	323	NRagged	262.85	173.49	173.48	-3.37
L.VGKPPFEANTYQETYK.R	1871.92	1871.92	-0.3	624.644	324	324	NRagged	306.82	266.83	266.82	-4.23
I.SRVEFTFPDFVTEGAR.D	1857.91	1857.91	0.3	929.46	342	342	NRagged	414.77	236.89	236.88	-4.97
I.SRVEFTFPDFVTEGAR.D	1857.91	1857.92	1.8	929.462	342	342	NRagged	489.31	258.27	258.26	-4.96
I.SRVEFTFPDFVTEGAR.D	1857.91	1857.92	1.3	929.461	342	342	NRagged	418.09	235.47	235.46	-4.55
I.SRVEFTFPDFVTEGAR.D	1857.91	1857.91	0	619.976	342	342	NRagged	290.07	186.04	186.03	-3.5
V.EFTFPDFVTEGAR.D	1515.71	1515.71	0.2	758.36	345	345	NRagged	407.75	267.32	267.31	-5.64
V.EFTFPDFVTEGAR.D	1515.71	1515.71	1.3	758.36	345	345	NRagged	361.27	224.58	224.57	-4.37
E.FTFPDFVTEGAR.D	1386.67	1386.67	0	693.838	346	346	NRagged	423.89	261.37	261.36	-5.89
E.FTFPDFVTEGAR.D	1386.67	1386.67	-0.4	693.838	346	346	NRagged	379.66	228.96	228.95	-4.99
E.FTFPDFVTEGAR.D	1386.67	1386.67	1.3	693.839	346	346	NRagged	382.14	193.78	193.77	-4.67
F.TFPDFVTEGAR.D	1239.6	1239.6	-0.5	620.303	347	347	NRagged	351.64	171.25	171.24	-4.29
F.TFPDFVTEGAR.D	1239.6	1239.6	0	620.304	347	347	NRagged	364.73	178.07	178.06	-4.25
F.TFPDFVTEGAR.D	1239.6	1239.6	0.5	620.304	347	347	NRagged	323.28	181.24	181.23	-4.09
F.TFPDFVTEGAR.D	1239.6	1239.6	0.5	620.304	347	347	NRagged	316.66	170.57	170.56	-3.97
F.TFPDFVTEGAR.D	1239.6	1239.6	-0.2	620.304	347	347	NRagged	306.98	151.63	151.62	-3.56
F.TFPDFVTEGAR.D	1239.6	1239.6	0.4	620.304	347	347	NRagged	307.78	139.29	139.28	-3.32
R.ISRVEFTFPDFVTEGA.R	1814.9	1814.9	0	907.952	341	356	CRagged	311.51	182.3	182.29	-4.13
R.LLKHNPSQRPM.L	1320.72	1320.72	-0.1	660.864	363	373	CRagged	346.31	197.88	197.87	-3.84
R.LLKHNPSQRPM.L	1320.72	1320.72	0.2	660.864	363	373	CRagged	331.16	213.64	213.63	-3.37
R.LLKHNPSQRPML.R	1433.8	1433.8	0.1	717.406	363	374	CRagged	313.16	194.22	194.21	-3.4
R.E[-18.01057]VLEHPWITAN.S	1290.65	1290.65	0.5	645.828	376	386	CRagged	378.97	105.88	105.87	-3.19
R.E[-18.01057]VLEHPWITAN.S	1290.65	1290.65	0	645.827	376	386	CRagged	340.55	159.92	159.91	-3.09
R.EVLEHPW[+31.98983]ITAN.S	1340.65	1340.65	0.4	670.828	376	386	CRagged	378.6	179.44	150.14	-3.77
R.EVLEHPW[+31.98983]ITAN.S	1340.65	1340.65	-0.6	670.827	376	386	CRagged	371.38	182.49	165.36	-3.37
R.EVLEHPWITAN.S	1308.66	1308.66	-0.2	654.833	376	386	CRagged	496.07	286.76	286.75	-6.29
R.EVLEHPWITAN.S	1308.66	1308.66	-1.1	654.832	376	386	CRagged	527.5	256.77	256.76	-5.93
R.EVLEHPWITAN.S	1308.66	1308.66	0.6	654.833	376	386	CRagged	459.69	253.07	253.06	-5.79
R.EVLEHPWITAN.S	1308.66	1308.66	-0.1	654.833	376	386	CRagged	548.5	348.69	348.68	-5.49
R.EVLEHPWITAN.S	1308.66	1308.66	-0.6	654.832	376	386	CRagged	474.16	292	291.99	-5.48
R.EVLEHPWITAN.S	1308.66	1308.66	-0.1	654.833	376	386	CRagged	430.76	238.73	238.72	-5.44
R.EVLEHPWITAN.S	1308.66	1308.66	1.6	654.834	376	386	CRagged	426.71	249.5	249.49	-5.31
R.EVLEHPWITAN.S	1308.66	1308.66	0.4	654.833	376	386	CRagged	416.75	243.22	243.21	-5.29
R.EVLEHPWITAN.S	1308.66	1308.66	-0.2	654.833	376	386	CRagged	416.5	270.1	270.09	-5.27
R.EVLEHPWITAN.S	1308.66	1308.66	0.8	654.833	376	386	CRagged	403.43	240.79	240.78	-5.14
R.EVLEHPWITAN.S	1308.66	1308.66	0.4	1308.66	376	386	CRagged	435	254.27	254.26	-5.09
R.EVLEHPWITAN.S	1308.66	1308.66	0.6	1308.66	376	386	CRagged	449.88	218.51	218.5	-5.08
R.EVLEHPWITAN.S	1308.66	1308.66	-1.5	654.832	376	386	CRagged	441.12	239.47	239.46	-5.05
R.EVLEHPWITAN.S	1308.66	1308.66	-1.4	654.832	376	386	CRagged	432.36	227.74	227.73	-5.04
R.EVLEHPWITAN.S	1308.66	1308.66	0.3	654.833	376	386	CRagged	373.46	218.99	218.98	-5
R.EVLEHPWITAN.S	1308.66	1308.66	0.2	654.833	376	386	CRagged	385.63	224.98	224.97	-4.87
R.EVLEHPWITAN.S	1308.66	1308.66	0.3	654.833	376	386	CRagged	372.88	208.82	208.81	-4.71
R.EVLEHPWITAN.S	1308.66	1308.66	0.2	654.833	376	386	CRagged	365.1	167.94	167.93	-4.68
R.EVLEHPWITAN.S	1308.66	1308.66	-0.4	654.832	376	386	CRagged	352.94	154.81	154.8	-4.52
R.EVLEHPWITAN.S	1308.66	1308.66	0.9	654.833	376	386	CRagged	378.84	231.27	231.26	-4.47
R.EVLEHPWITAN.S	1308.66	1308.66	-1.6	1308.66	376	386	CRagged	422.23	175.48	175.47	-4.24
R.EVLEHPWITAN.S	1308.66	1308.66	-0.7	654.832	376	386	CRagged	342.5	164.85	164.84	-4.19
R.EVLEHPWITAN.S	1308.66	1308.66	0.3	654.833	376	386	CRagged	347.78	177.32	177.31	-3.42
R.EVLEHPWITANSSKPSN.C	1908.94	1908.95	0.9	954.977	376	392	CRagged	464.17	316.54	316.53	-6.32
R.EVLEHPWITANSSKPSN.C	1908.94	1908.95	0.3	954.976	376	392	CRagged	513.64	368.18	368.17	-6.26
R.EVLEHPWITANSSKPSN.C	1908.94	1908.95	1.3	954.977	376	392	CRagged	468.97	339.61	339.6	-5.34
R.EVLEHPWITANSSKPSN.C	1908.94	1908.95	0.2	636.987	376	392	CRagged	259.91	166.56	166.55	-3.42
