# Supplementary material for: Aurora kinase A localises to mitochondria to control organelle dynamics and energy production
Source: eLife journal article supplement (doi:10.7554/elife.38111), 2018-08-02
Supplement: supp [file elife-38111-supp-v1.zip › elife_poa_e38111_Supplementary_File_2.xlsx]

## Sheet: Protein IDs
Description	Uniprot accession	Gene name	Best Score	PSMs	Coverage (%)
Aurora kinase A	AURKA_HUMAN	AURKA	830.3	4917	93.15
Heat shock 70 kDa protein 1B	HS71B_HUMAN	HSPA1B	659.6	2345	95.48
Vimentin	VIME_HUMAN	VIM	761.1	1086	93.78
Tubulin beta chain	TBB5_HUMAN	TUBB	783.6	1031	74.32
60 kDa heat shock protein, mitochondrial	CH60_HUMAN	HSPD1	614.7	986	84.99
Lamin-B1	LMNB1_HUMAN	LMNB1	666.2	836	83.45
Tubulin alpha-1B chain	TBA1B_HUMAN	TUBA1B	657.6	719	84.48
ATP synthase subunit alpha, mitochondrial	ATPA_HUMAN	ATP5A1	623.2	667	76.49
Stress-70 protein, mitochondrial	GRP75_HUMAN	HSPA9	540.5	579	77.91
ATP synthase subunit beta, mitochondrial	ATPB_HUMAN	ATP5B	688.4	534	85.07
Heat shock cognate 71 kDa protein	HSP7C_HUMAN	HSPA8	574.8	496	63.78
Lamin-B2	LMNB2_HUMAN	LMNB2	518.1	405	69.19
Actin, cytoplasmic 1	ACTB_HUMAN	ACTB	566.3	392	74.4
Heat shock protein HSP 90-beta	HS90B_HUMAN	HSP90AB1	625	383	62.71
DNA-dependent protein kinase catalytic subunit	PRKDC_HUMAN	PRKDC	675.3	370	36.34
Elongation factor 1-alpha 1	EF1A1_HUMAN	EEF1A1	614.1	369	60.17
78 kDa glucose-regulated protein	GRP78_HUMAN	HSPA5	513.3	366	66.67
Heterogeneous nuclear ribonucleoprotein M	HNRPM_HUMAN	HNRNPM	621.4	347	68.77
Titin	TITIN_HUMAN	TTN	328.4	332	9.87
ATPase family AAA domain-containing protein 3A	ATD3A_HUMAN	ATAD3A	532.4	330	83.45
Polyadenylate-binding protein 1	PABP1_HUMAN	PABPC1	598.7	317	64.31
ATP-dependent RNA helicase DDX3X	A0A0D9SF53_HUMAN	DDX3X	528.3	316	62.07
Insulin-like growth factor 2 mRNA-binding protein 1	IF2B1_HUMAN	IGF2BP1	627.6	306	64.64
Heat shock protein 75 kDa, mitochondrial	TRAP1_HUMAN	TRAP1	512.7	300	68.75
ADP/ATP translocase 2	ADT2_HUMAN	SLC25A5	521.1	294	66.44
Prelamin-A/C	LMNA_HUMAN	LMNA	539.6	286	64.46
Cytoskeleton-associated protein 4	CKAP4_HUMAN	CKAP4	560.1	282	74.09
Delta-1-pyrroline-5-carboxylate synthase	P5CS_HUMAN	ALDH18A1	610.8	274	59.62
T-complex protein 1 subunit beta	TCPB_HUMAN	CCT2	502.3	271	72.9
Insulin receptor substrate 4	IRS4_HUMAN	IRS4	579.3	269	48.21
X-ray repair cross-complementing protein 6	XRCC6_HUMAN	XRCC6	524.7	259	61.58
Sorting nexin-18	SNX18_HUMAN	SNX18	683.9	255	73.24
Spectrin alpha chain, non-erythrocytic 1	SPTN1_HUMAN	SPTAN1	589.2	248	54.57
D-3-phosphoglycerate dehydrogenase	SERA_HUMAN	PHGDH	652.3	239	50.84
Probable ATP-dependent RNA helicase DDX5	DDX5_HUMAN	DDX5	646.5	231	52.44
Leucine-rich PPR motif-containing protein, mitochondrial	LPPRC_HUMAN	LRPPRC	461.1	230	59.68
Dolichyl-diphosphooligosaccharide--protein glycosyltransferase subunit 1	RPN1_HUMAN	RPN1	521.4	224	71.5
GTP-binding nuclear protein Ran	RAN_HUMAN	RAN	675.2	221	81.48
Calcium-binding mitochondrial carrier protein Aralar2	CMC2_HUMAN	SLC25A13	469.4	218	59.7
Prohibitin-2	PHB2_HUMAN	PHB2	643.6	215	84.62
E3 ubiquitin-protein ligase TRIM21	RO52_HUMAN	TRIM21	591.3	208	48.63
Cytoplasmic dynein 1 heavy chain 1	DYHC1_HUMAN	DYNC1H1	506.8	205	29.53
Endoplasmin	ENPL_HUMAN	HSP90B1	551.8	204	55.42
MICOS complex subunit MIC60	MIC60_HUMAN	IMMT	568	202	67.07
Heterogeneous nuclear ribonucleoprotein U	HNRPU_HUMAN	HNRNPU	553.6	200	43.64
Trifunctional enzyme subunit alpha, mitochondrial	ECHA_HUMAN	HADHA	480.7	199	65.4
Elongation factor Tu, mitochondrial	EFTU_HUMAN	TUFM	574.4	197	64.16
Putative ATP-dependent RNA helicase DHX30	DHX30_HUMAN	DHX30	512	192	61.87
Ras GTPase-activating protein-binding protein 1	G3BP1_HUMAN	G3BP1	495.4	192	47.64
Prohibitin	PHB_HUMAN	PHB	555.4	191	90.07
Glutamate dehydrogenase 1, mitochondrial	DHE3_HUMAN	GLUD1	490.9	190	65.23
Poly [ADP-ribose] polymerase 1	PARP1_HUMAN	PARP1	555.6	186	56.21
NADH-ubiquinone oxidoreductase 75 kDa subunit, mitochondrial	NDUS1_HUMAN	NDUFS1	430	186	59.28
Clathrin heavy chain 1	CLH1_HUMAN	CLTC	473.2	180	51.56
T-complex protein 1 subunit gamma	TCPG_HUMAN	CCT3	503.8	176	72.11
Cellular tumor antigen p53	P53_HUMAN	TP53	494.5	176	57.25
Sarcoplasmic/endoplasmic reticulum calcium ATPase 2	AT2A2_HUMAN	ATP2A2	588.4	172	38.77
Protein disulfide-isomerase A4	PDIA4_HUMAN	PDIA4	431.4	172	67.75
Spectrin beta chain, non-erythrocytic 1	SPTB2_HUMAN	SPTBN1	488.2	165	47.46
Succinate dehydrogenase [ubiquinone] flavoprotein subunit, mitochondrial	SDHA_HUMAN	SDHA	478.7	163	55.27
Sodium/potassium-transporting ATPase subunit alpha-1	AT1A1_HUMAN	ATP1A1	631.3	161	56.11
Pyruvate kinase PKM	KPYM_HUMAN	PKM	626.7	158	64.41
Calnexin	CALX_HUMAN	CANX	605	158	57.74
Complement component 1 Q subcomponent-binding protein, mitochondrial	C1QBP_HUMAN	C1QBP	614.8	156	64.54
Aspartate--tRNA ligase, cytoplasmic	SYDC_HUMAN	DARS	458.8	155	60.08
RuvB-like 2	RUVB2_HUMAN	RUVBL2	532.6	154	66.09
Serine hydroxymethyltransferase, mitochondrial	GLYM_HUMAN	SHMT2	474.3	154	64.68
DNA replication licensing factor MCM7	MCM7_HUMAN	MCM7	548.8	151	59.39
26S proteasome non-ATPase regulatory subunit 3	PSMD3_HUMAN	PSMD3	590.6	150	69.1
T-complex protein 1 subunit alpha	TCPA_HUMAN	TCP1	547.1	149	58.27
Plastin-3	PLST_HUMAN	PLS3	468.8	148	46.19
Ubiquitin-40S ribosomal protein S27a	RS27A_HUMAN	RPS27A	495.9	147	48.08
X-ray repair cross-complementing protein 5	XRCC5_HUMAN	XRCC5	460	147	64.89
Utrophin	UTRO_HUMAN	UTRN	280.7	147	11.13
Eukaryotic initiation factor 4A-I	IF4A1_HUMAN	EIF4A1	647.2	144	76.35
Heterogeneous nuclear ribonucleoprotein H	G8JLB6_HUMAN	HNRNPH1	487.1	143	57.42
Lon protease homolog	K7EKE6_HUMAN	LONP1	616.6	139	66.04
Replication protein A 70 kDa DNA-binding subunit	RFA1_HUMAN	RPA1	535.8	139	53.73
T-complex protein 1 subunit delta	TCPD_HUMAN	CCT4	488.7	139	55.84
Pyrroline-5-carboxylate reductase 3	P5CR3_HUMAN	PYCRL	666.5	138	48.54
Tubulin beta-4B chain	TBB4B_HUMAN	TUBB4B	652.5	137	24.72
Heat shock protein HSP 90-alpha	HS90A_HUMAN	HSP90AA1	480.9	137	30.44
Voltage-dependent anion-selective channel protein 1	VDAC1_HUMAN	VDAC1	511	135	77.74
Fragile X mental retardation syndrome-related protein 1	FXR1_HUMAN	FXR1	456.6	135	53.14
Dolichyl-diphosphooligosaccharide--protein glycosyltransferase subunit 2	RPN2_HUMAN	RPN2	500	134	76.1
Mucin-16	MUC16_HUMAN	MUC16	450.1	133	16.43
Myosin-10	MYH10_HUMAN	MYH10	445.2	133	39.76
Uncharacterized protein	B4DLN1_HUMAN		626.4	130	55.66
Apoptosis-inducing factor 1, mitochondrial	AIFM1_HUMAN	AIFM1	509.7	130	64.11
eIF-2-alpha kinase activator GCN1	GCN1_HUMAN	GCN1	458.5	130	28.3
Arginine--tRNA ligase, cytoplasmic	SYRC_HUMAN	RARS	420.5	130	41.21
Nuclease-sensitive element-binding protein 1	YBOX1_HUMAN	YBX1	631.6	129	72.22
Ribonucleoprotein PTB-binding 1	A0A087WZ13_HUMAN	RAVER1	475	129	62.52
RuvB-like 1	RUVB1_HUMAN	RUVBL1	597.9	128	62.06
Polyadenylate-binding protein 4	PABP4_HUMAN	PABPC4	537.4	128	49.85
Histone H4	H4_HUMAN	HIST1H4A	506.3	128	65.05
Heterogeneous nuclear ribonucleoprotein K	HNRPK_HUMAN	HNRNPK	559.4	127	56.03
Phosphate carrier protein, mitochondrial	MPCP_HUMAN	SLC25A3	450.1	126	51.1
Bifunctional glutamate/proline--tRNA ligase	SYEP_HUMAN	EPRS	486.4	125	43.19
Alpha-actinin-4	ACTN4_HUMAN	ACTN4	487.4	123	56.64
Neurofilament medium polypeptide	NFM_HUMAN	NEFM	482.6	121	56.88
RNA-binding protein 14	RBM14_HUMAN	RBM14	537.6	120	53.51
Histone H2A type 2-A	H2A2A_HUMAN	HIST2H2AA3	527.6	119	57.69
Probable ATP-dependent RNA helicase DDX17	DDX17_HUMAN	DDX17	528.1	118	42.66
Heterogeneous nuclear ribonucleoprotein Q	HNRPQ_HUMAN	SYNCRIP	538	115	44.31
Leucine-rich repeat-containing protein 47	LRC47_HUMAN	LRRC47	556.2	113	49.4
Peroxisomal multifunctional enzyme type 2	DHB4_HUMAN	HSD17B4	466.6	113	65.9
Golgin subfamily B member 1	GOGB1_HUMAN	GOLGB1	382.2	113	24.29
Histone H2B type 1-M	H2B1M_HUMAN	HIST1H2BM	634.4	112	53.17
Cytochrome b-c1 complex subunit 2, mitochondrial	QCR2_HUMAN	UQCRC2	531.4	111	67.99
Importin subunit alpha-1	IMA1_HUMAN	KPNA2	490.8	111	47.83
Myosin-9	MYH9_HUMAN	MYH9	492.5	110	37.86
Insulin-like growth factor 2 mRNA-binding protein 3	IF2B3_HUMAN	IGF2BP3	484.1	110	57.69
Elongation factor 2	EF2_HUMAN	EEF2	566.2	109	41.26
Microtubule-actin cross-linking factor 1, isoforms 1/2/3/5	H3BQK9_HUMAN	MACF1	422.9	109	17.45
Peptidyl-prolyl cis-trans isomerase FKBP4	FKBP4_HUMAN	FKBP4	457.7	107	64.49
Mitochondrial import receptor subunit TOM70	TOM70_HUMAN	TOMM70A	414.1	107	48.36
GMP synthase [glutamine-hydrolyzing]	GUAA_HUMAN	GMPS	599	106	51.66
Protein disulfide-isomerase A3	PDIA3_HUMAN	PDIA3	452.9	106	57.82
NAD(P) transhydrogenase, mitochondrial	NNTM_HUMAN	NNT	426.8	106	63.63
Signal recognition particle 54 kDa protein	SRP54_HUMAN	SRP54	488.3	105	53.77
Neurofilament light polypeptide	NFL_HUMAN	NEFL	436.2	105	55.25
Eukaryotic translation initiation factor 3 subunit L	EIF3L_HUMAN	EIF3L	509	104	54.61
Polypyrimidine tract-binding protein 1	PTBP1_HUMAN	PTBP1	459.3	104	51.35
Signal recognition particle subunit SRP68	SRP68_HUMAN	SRP68	540.1	103	49.92
Leucine-rich repeat-containing protein 40	LRC40_HUMAN	LRRC40	511.3	103	56.15
Citrate synthase, mitochondrial	CISY_HUMAN	CS	542.9	102	73.39
Insulin-like growth factor 2 mRNA-binding protein 2	IF2B2_HUMAN	IGF2BP2	419.4	102	48.38
Vesicle-fusing ATPase	NSF_HUMAN	NSF	427.2	101	51.75
Hornerin	HORN_HUMAN	HRNR	468	100	26.18
Isoleucine--tRNA ligase, mitochondrial	SYIM_HUMAN	IARS2	405	100	50.49
Serum albumin	ALBU_HUMAN	ALB	359.8	100	43.35
T-complex protein 1 subunit zeta	TCPZ_HUMAN	CCT6A	470.7	99	53.86
Angiomotin	AMOT_HUMAN	AMOT	428.9	99	52.95
Alkyldihydroxyacetonephosphate synthase, peroxisomal	ADAS_HUMAN	AGPS	370.5	99	37.39
V-type proton ATPase catalytic subunit A	VATA_HUMAN	ATP6V1A	471.1	98	62.07
Methionine--tRNA ligase, cytoplasmic	SYMC_HUMAN	MARS	706.8	96	41.67
Neutral alpha-glucosidase AB	GANAB_HUMAN	GANAB	511.5	96	50.52
Sorting nexin-2	SNX2_HUMAN	SNX2	487.7	94	53.56
Long-chain-fatty-acid--CoA ligase 3	ACSL3_HUMAN	ACSL3	394.6	93	46.11
Sideroflexin-1	SFXN1_HUMAN	SFXN1	570	91	67.39
Plasminogen activator inhibitor 1 RNA-binding protein	PAIRB_HUMAN	SERBP1	458.1	91	49.51
Non-POU domain-containing octamer-binding protein	NONO_HUMAN	NONO	407.8	91	54.99
YTH domain-containing family protein 2	YTHD2_HUMAN	YTHDF2	519.6	90	50.43
Kinectin	KTN1_HUMAN	KTN1	480.6	90	39.79
Dihydrolipoyllysine-residue acetyltransferase component of pyruvate dehydrogenase complex, mitochondrial	ODP2_HUMAN	DLAT	447.9	90	50.7
Transketolase	TKT_HUMAN	TKT	435.2	90	34.19
Aconitate hydratase, mitochondrial	ACON_HUMAN	ACO2	377.9	90	59.36
Glycerol-3-phosphate dehydrogenase, mitochondrial	GPDM_HUMAN	GPD2	372.4	90	52.68
Heat shock 70 kDa protein 6	HSP76_HUMAN	HSPA6	519.6	89	16.49
ATP-binding cassette sub-family D member 3	ABCD3_HUMAN	ABCD3	448.6	89	39.61
Cyclin-dependent kinase 1	CDK1_HUMAN	CDK1	515.4	88	66.33
tRNA-splicing ligase RtcB homolog	RTCB_HUMAN	RTCB	451.2	87	41.98
Guanine nucleotide-binding protein-like 3	GNL3_HUMAN	GNL3	592.3	86	40.98
Eukaryotic translation initiation factor 4 gamma 1	IF4G1_HUMAN	EIF4G1	436.7	86	47.09
Tubulin beta-2A chain	TBB2A_HUMAN	TUBB2A	618.7	85	19.55
ADP/ATP translocase 3	ADT3_HUMAN	SLC25A6	525.7	85	41.61
Desmoplakin	DESP_HUMAN	DSP	496.5	85	19.3
Nucleolin	NUCL_HUMAN	NCL	556.7	84	35.35
Carnitine O-palmitoyltransferase 2, mitochondrial	CPT2_HUMAN	CPT2	403.9	84	53.04
Junction plakoglobin	PLAK_HUMAN	JUP	368.1	83	32.35
Serine/threonine-protein phosphatase PGAM5, mitochondrial	PGAM5_HUMAN	PGAM5	576.1	81	63.32
Nicotinamide phosphoribosyltransferase	NAMPT_HUMAN	NAMPT	572.9	81	51.53
LETM1 and EF-hand domain-containing protein 1, mitochondrial	LETM1_HUMAN	LETM1	515.2	81	51.83
Dolichyl-diphosphooligosaccharide--protein glycosyltransferase 48 kDa subunit	OST48_HUMAN	DDOST	655.9	80	63.38
60S ribosomal protein L17	RL17_HUMAN	RPL17	643.6	80	45.18
ATP-dependent RNA helicase DDX39A	DX39A_HUMAN	DDX39A	594.2	80	51.52
Clathrin interactor 1	EPN4_HUMAN	CLINT1	532.2	80	57.92
Fatty acid synthase	A0A0U1RQF0_HUMAN	FASN	565.3	79	25.79
Elongation factor 1-gamma	EF1G_HUMAN	EEF1G	524	79	53.32
Lysine--tRNA ligase	SYK_HUMAN	KARS	467.3	79	52.93
Calcium-binding mitochondrial carrier protein Aralar1	CMC1_HUMAN	SLC25A12	462.5	79	56.34
Importin subunit beta-1	IMB1_HUMAN	KPNB1	457.8	79	38.93
Membrane-associated progesterone receptor component 1	PGRC1_HUMAN	PGRMC1	450.4	79	62.56
KH domain-containing, RNA-binding, signal transduction-associated protein 1	KHDR1_HUMAN	KHDRBS1	446.8	79	35.21
Coatomer subunit gamma-1	COPG1_HUMAN	COPG1	438	79	31.58
ATP-binding cassette sub-family F member 2	ABCF2_HUMAN	ABCF2	392.9	79	34.07
Staphylococcal nuclease domain-containing protein 1	SND1_HUMAN	SND1	392.3	79	44.51
Serpin H1	SERPH_HUMAN	SERPINH1	638.4	78	62.44
Mitochondrial 2-oxoglutarate/malate carrier protein	M2OM_HUMAN	SLC25A11	594	78	65.29
CTP synthase 1	PYRG1_HUMAN	CTPS1	553.2	78	50.93
Nucleolar RNA helicase 2	DDX21_HUMAN	DDX21	487.5	78	43.81
ATP-dependent RNA helicase A	DHX9_HUMAN	DHX9	484.5	78	35.75
40S ribosomal protein S24	RS24_HUMAN	RPS24	483.2	78	23.53
5'-nucleotidase domain-containing protein 2	NT5D2_HUMAN	NT5DC2	420.8	78	48.11
Polyribonucleotide nucleotidyltransferase 1, mitochondrial	PNPT1_HUMAN	PNPT1	410.1	78	52.87
Programmed cell death 6-interacting protein	PDC6I_HUMAN	PDCD6IP	566.1	77	34.56
Monocarboxylate transporter 1	MOT1_HUMAN	SLC16A1	542.6	77	27.2
Ran GTPase-activating protein 1	RAGP1_HUMAN	RANGAP1	536.7	77	47.7
Calreticulin	CALR_HUMAN	CALR	486	77	69.54
Filamin-B	FLNB_HUMAN	FLNB	449.9	77	21.04
CAD protein	PYR1_HUMAN	CAD	443.1	77	23.64
Dihydropyrimidinase-related protein 3	DPYL3_HUMAN	DPYSL3	410.6	77	39.33
Leucine--tRNA ligase, cytoplasmic	SYLC_HUMAN	LARS	505.1	76	35.29
cAMP-dependent protein kinase type II-alpha regulatory subunit	KAP2_HUMAN	PRKAR2A	501.7	76	61.26
Aspartate--tRNA ligase, mitochondrial	SYDM_HUMAN	DARS2	458.9	76	40.78
Nuclear pore complex protein Nup205	NU205_HUMAN	NUP205	451.1	76	23.56
Nodal modulator 1	NOMO1_HUMAN	NOMO1	446.1	76	38.13
Isoleucine--tRNA ligase, cytoplasmic	SYIC_HUMAN	IARS	424.2	76	35.82
Mucin-19	MUC19_HUMAN	MUC19	400.2	76	31.08
Dystonin	DYST_HUMAN	DST	315	76	13.61
Extended synaptotagmin-1	ESYT1_HUMAN	ESYT1	498.7	75	45.65
Pyruvate carboxylase, mitochondrial	PYC_HUMAN	PC	454.4	75	42.95
T-complex protein 1 subunit eta	TCPH_HUMAN	CCT7	443.4	75	56.91
Lamina-associated polypeptide 2, isoforms beta/gamma	LAP2B_HUMAN	TMPO	558.1	74	57.49
Inosine-5'-monophosphate dehydrogenase 2	IMDH2_HUMAN	IMPDH2	482.9	74	36.58
ATP synthase subunit gamma, mitochondrial	ATPG_HUMAN	ATP5C1	479.1	74	46.31
Heterogeneous nuclear ribonucleoproteins A2/B1	ROA2_HUMAN	HNRNPA2B1	393.2	74	66.01
Transcription intermediary factor 1-beta	TIF1B_HUMAN	TRIM28	684.2	73	45.87
Trifunctional enzyme subunit beta, mitochondrial	ECHB_HUMAN	HADHB	421.6	73	69.83
Protein ERGIC-53	LMAN1_HUMAN	LMAN1	397.9	73	48.82
C-1-tetrahydrofolate synthase, cytoplasmic	F5H2F4_HUMAN	MTHFD1	386.1	73	34.31
Stress-induced-phosphoprotein 1	STIP1_HUMAN	STIP1	377.7	73	45.67
Voltage-dependent anion-selective channel protein 2	VDAC2_HUMAN	VDAC2	493.9	72	41.42
Splicing factor, proline- and glutamine-rich	SFPQ_HUMAN	SFPQ	476.5	72	45.54
Fructose-bisphosphate aldolase A	ALDOA_HUMAN	ALDOA	505	71	43.96
DnaJ homolog subfamily C member 11	DJC11_HUMAN	DNAJC11	497.3	71	39.89
Lamin-B receptor	LBR_HUMAN	LBR	456.1	71	27.97
Coatomer subunit beta	COPB_HUMAN	COPB1	656.9	70	37.36
Golgi resident protein GCP60	GCP60_HUMAN	ACBD3	503.1	70	36.55
Hexokinase-1	HXK1_HUMAN	HK1	425.3	70	35.77
Coronin-1C	COR1C_HUMAN	CORO1C	421.4	70	41.77
Aldehyde dehydrogenase, mitochondrial	ALDH2_HUMAN	ALDH2	406.3	70	62.28
Presequence protease, mitochondrial	PREP_HUMAN	PITRM1	373.8	70	39.92
Ras GTPase-activating-like protein IQGAP1	IQGA1_HUMAN	IQGAP1	501	69	34.22
NADH dehydrogenase [ubiquinone] iron-sulfur protein 2, mitochondrial	NDUS2_HUMAN	NDUFS2	462.9	69	63.5
Cytoskeleton-associated protein 5	CKAP5_HUMAN	CKAP5	426.2	69	28.1
Dolichyl-diphosphooligosaccharide--protein glycosyltransferase subunit STT3A	STT3A_HUMAN	STT3A	402	69	25.25
Apolipoprotein A-I	APOA1_HUMAN	APOA1	543.5	68	55.43
Thioredoxin-dependent peroxide reductase, mitochondrial	PRDX3_HUMAN	PRDX3	450.1	68	44.53
Translocation protein SEC63 homolog	SEC63_HUMAN	SEC63	360.1	68	36.18
T-complex protein 1 subunit epsilon	TCPE_HUMAN	CCT5	461.1	67	56.01
Ornithine aminotransferase, mitochondrial	OAT_HUMAN	OAT	447.1	67	56.49
Far upstream element-binding protein 1	FUBP1_HUMAN	FUBP1	438.5	67	47.83
Phenylalanine--tRNA ligase beta subunit	SYFB_HUMAN	FARSB	425.4	67	31.92
E3 SUMO-protein ligase RanBP2	RBP2_HUMAN	RANBP2	386.9	67	18.58
Neuroblast differentiation-associated protein AHNAK	AHNK_HUMAN	AHNAK	285.9	67	12.46
Protein disulfide-isomerase A6	PDIA6_HUMAN	PDIA6	532.3	66	46.75
Myristoylated alanine-rich C-kinase substrate	A0A087WZH7_HUMAN	MARCKS	513.2	66	60.61
Plastin-2	PLSL_HUMAN	LCP1	422.8	66	43.22
Leucine-rich repeat-containing protein 59	LRC59_HUMAN	LRRC59	421.7	66	49.51
Synapse-associated protein 1	SYAP1_HUMAN	SYAP1	570.3	65	34.66
Mitochondrial import receptor subunit TOM22 homolog	TOM22_HUMAN	TOMM22	538.8	65	86.62
Cytochrome c oxidase subunit 2	COX2_HUMAN	MT-CO2	521.5	65	46.26
Ribosome-binding protein 1	RRBP1_HUMAN	RRBP1	494.8	65	27.45
CDK5 regulatory subunit-associated protein 3	CK5P3_HUMAN	CDK5RAP3	434	65	62.85
Eukaryotic translation initiation factor 3 subunit A	EIF3A_HUMAN	EIF3A	407.2	65	27.93
Protein disulfide-isomerase	PDIA1_HUMAN	P4HB	405.3	65	57.48
ATP-dependent RNA helicase DDX19A	DD19A_HUMAN	DDX19A	705.2	64	49.79
Cullin-associated NEDD8-dissociated protein 1	CAND1_HUMAN	CAND1	555.5	64	25.77
Probable ATP-dependent RNA helicase DDX6	DDX6_HUMAN	DDX6	509	64	53.21
Sec1 family domain-containing protein 1	SCFD1_HUMAN	SCFD1	489.3	64	41.12
Ras-related protein Rab-1B	RAB1B_HUMAN	RAB1B	471.6	64	78.61
Alanine--tRNA ligase, mitochondrial	SYAM_HUMAN	AARS2	421.4	64	39.9
NADH dehydrogenase [ubiquinone] 1 alpha subcomplex subunit 9, mitochondrial	NDUA9_HUMAN	NDUFA9	419.3	64	55.44
Polypeptide N-acetylgalactosaminyltransferase 2	GALT2_HUMAN	GALNT2	412	64	37.83
ATP synthase F(0) complex subunit B1, mitochondrial	AT5F1_HUMAN	ATP5F1	522.9	63	58.59
Eukaryotic translation initiation factor 2 subunit 3	IF2G_HUMAN	EIF2S3	512.9	63	44.49
Ras GTPase-activating protein-binding protein 2	G3BP2_HUMAN	G3BP2	504.3	63	32.96
Collagen alpha-1(I) chain	CO1A1_HUMAN	COL1A1	480.3	63	28.21
Monofunctional C1-tetrahydrofolate synthase, mitochondrial	C1TM_HUMAN	MTHFD1L	463.7	63	40.7
RNA-binding protein FUS	FUS_HUMAN	FUS	421	63	20.72
Protein regulator of cytokinesis 1	PRC1_HUMAN	PRC1	395.5	63	43.23
Exportin-2	XPO2_HUMAN	CSE1L	475.8	62	33.68
Pyruvate dehydrogenase E1 component subunit beta, mitochondrial	ODPB_HUMAN	PDHB	473.1	62	53.37
V-type proton ATPase subunit B, brain isoform	VATB2_HUMAN	ATP6V1B2	446.5	62	39.92
Basigin	BASI_HUMAN	BSG	442.6	62	55.76
Matrin-3	A8MXP9_HUMAN	MATR3	599.9	60	37.88
Mitochondrial carrier homolog 2	MTCH2_HUMAN	MTCH2	529.2	60	46.53
Acylglycerol kinase, mitochondrial	AGK_HUMAN	AGK	526.9	60	56.4
DNA-directed RNA polymerase, mitochondrial	RPOM_HUMAN	POLRMT	520.5	60	32.03
Phosphatidylinositol-binding clathrin assembly protein	PICAL_HUMAN	PICALM	515.7	60	31.6
Dihydrolipoyl dehydrogenase, mitochondrial	DLDH_HUMAN	DLD	502.1	60	35.17
Signal recognition particle subunit SRP72	SRP72_HUMAN	SRP72	481.6	60	48.58
Serine/threonine-protein phosphatase 2A 56 kDa regulatory subunit delta isoform	2A5D_HUMAN	PPP2R5D	412	60	44.21
Radixin	RADI_HUMAN	RDX	410.1	60	32.12
Plectin	PLEC_HUMAN	PLEC	332.6	60	13.55
Dynamin-like 120 kDa protein, mitochondrial	OPA1_HUMAN	OPA1	577.3	59	34.6
Ras-related protein Rab-7a	RAB7A_HUMAN	RAB7A	464.4	59	70.53
Nicalin	NCLN_HUMAN	NCLN	458.8	59	50.89
Eukaryotic translation initiation factor 3 subunit D	EIF3D_HUMAN	EIF3D	520.7	58	29.56
DnaJ homolog subfamily A member 1	DNJA1_HUMAN	DNAJA1	486.3	58	43.32
Serine/threonine-protein kinase PLK1	PLK1_HUMAN	PLK1	464.4	58	31.67
Stomatin-like protein 2, mitochondrial	STML2_HUMAN	STOML2	433.8	58	68.82
Band 4.1-like protein 2	E41L2_HUMAN	EPB41L2	433	58	38.31
PDZ and LIM domain protein 5	PDLI5_HUMAN	PDLIM5	423.5	58	35.74
Structural maintenance of chromosomes protein 1A	SMC1A_HUMAN	SMC1A	422.7	58	22.95
Elongation factor G, mitochondrial	EFGM_HUMAN	GFM1	419.2	58	40.21
ATP-binding cassette sub-family B member 7, mitochondrial	ABCB7_HUMAN	ABCB7	384	58	40.29
Trifunctional purine biosynthetic protein adenosine-3	PUR2_HUMAN	GART	534.7	57	34.46
Eukaryotic peptide chain release factor subunit 1	ERF1_HUMAN	ETF1	512.7	57	42.79
Adipocyte plasma membrane-associated protein	APMAP_HUMAN	APMAP	476.3	57	51.68
Glutaminase kidney isoform, mitochondrial	GLSK_HUMAN	GLS	454.9	57	43.65
Uridine 5'-monophosphate synthase	UMPS_HUMAN	UMPS	426.1	57	49.37
Septin-9	SEPT9_HUMAN	SEPT9	678.1	56	48.12
ATP-binding cassette sub-family E member 1	ABCE1_HUMAN	ABCE1	510.6	56	40.4
Ankyrin-3	ANK3_HUMAN	ANK3	494.2	56	11.17
Acetyl-CoA acetyltransferase, mitochondrial	THIL_HUMAN	ACAT1	456.2	56	52.46
Phosphatidylinositide phosphatase SAC1	SAC1_HUMAN	SACM1L	425	56	43.95
T-complex protein 1 subunit theta	TCPQ_HUMAN	CCT8	407.3	56	41.61
Midasin	MDN1_HUMAN	MDN1	400.5	56	11.54
DNA replication licensing factor MCM4	MCM4_HUMAN	MCM4	486.8	55	46
DNA repair protein RAD50	RAD50_HUMAN	RAD50	473.9	55	23.63
Acyl-CoA dehydrogenase family member 9, mitochondrial	ACAD9_HUMAN	ACAD9	436.9	55	36.39
Nucleolar GTP-binding protein 1	NOG1_HUMAN	GTPBP4	423.3	55	37.22
Dihydrolipoyllysine-residue succinyltransferase component of 2-oxoglutarate dehydrogenase complex, mitochondrial	ODO2_HUMAN	DLST	418.5	55	52.54
Phospholipase A-2-activating protein	PLAP_HUMAN	PLAA	513.2	54	38.36
Dynamin-1-like protein	DNM1L_HUMAN	DNM1L	502.5	54	38.34
FAS-associated factor 2	FAF2_HUMAN	FAF2	498.7	54	48.54
Histone H3.2	H32_HUMAN	HIST2H3A	494.5	54	36.76
Negative elongation factor A	NELFA_HUMAN	NELFA	492.7	54	40.53
ATP-dependent Clp protease ATP-binding subunit clpX-like, mitochondrial	CLPX_HUMAN	CLPX	456.6	54	34.6
Cytochrome c oxidase subunit 5A, mitochondrial	COX5A_HUMAN	COX5A	443.9	54	62.67
Myb-binding protein 1A	MBB1A_HUMAN	MYBBP1A	418.3	54	23.19
Bystin	BYST_HUMAN	BYSL	395.8	54	39.59
Cytochrome b-c1 complex subunit 1, mitochondrial	QCR1_HUMAN	UQCRC1	382.6	54	45.21
Coatomer subunit delta	COPD_HUMAN	ARCN1	557.6	53	48.73
AP-2 complex subunit beta	AP2B1_HUMAN	AP2B1	517.7	53	39.59
26S proteasome non-ATPase regulatory subunit 12	PSD12_HUMAN	PSMD12	494.2	53	47.81
Kinesin light chain 2	KLC2_HUMAN	KLC2	477	53	44.69
Pyrroline-5-carboxylate reductase 1, mitochondrial	P5CR1_HUMAN	PYCR1	446.9	53	60.81
Cytochrome c oxidase subunit 4 isoform 1, mitochondrial	COX41_HUMAN	COX4I1	521	52	73.37
Catenin alpha-1	CTNA1_HUMAN	CTNNA1	497.3	52	38.08
AP-2 complex subunit mu	AP2M1_HUMAN	AP2M1	436.3	52	42.53
NADPH--cytochrome P450 reductase	NCPR_HUMAN	POR	384.3	52	37.52
Serine/threonine-protein kinase PAK 4	PAK4_HUMAN	PAK4	568.7	51	45.52
E3 ubiquitin-protein ligase HUWE1	HUWE1_HUMAN	HUWE1	447.1	51	18.45
Annexin A6	ANXA6_HUMAN	ANXA6	442.7	51	29.87
Annexin A11	ANX11_HUMAN	ANXA11	433.3	51	40.2
ADP-ribosylation factor GTPase-activating protein 3	ARFG3_HUMAN	ARFGAP3	423.5	51	35.47
Transmembrane 9 superfamily member 4	TM9S4_HUMAN	TM9SF4	409.9	51	36.29
Nuclear pore membrane glycoprotein 210	PO210_HUMAN	NUP210	387.1	51	33.28
Alstrom syndrome protein 1	ALMS1_HUMAN	ALMS1	285.8	51	13.51
Interferon regulatory factor 2-binding protein 1	I2BP1_HUMAN	IRF2BP1	471.9	50	41.1
Fibronectin	FINC_HUMAN	FN1	426.2	50	24
Filaggrin-2	FILA2_HUMAN	FLG2	410.6	50	26.93
Catenin beta-1	CTNB1_HUMAN	CTNNB1	366.1	50	39.31
EH domain-containing protein 4	EHD4_HUMAN	EHD4	541.4	49	37.89
Protein phosphatase 1G	PPM1G_HUMAN	PPM1G	509.9	49	41.21
Protein transport protein Sec61 subunit alpha isoform 1	S61A1_HUMAN	SEC61A1	487.8	49	34.24
Adenylyl cyclase-associated protein 1	CAP1_HUMAN	CAP1	447.3	49	40.63
Receptor of activated protein C kinase 1	RACK1_HUMAN	RACK1	421.9	49	46.06
Coatomer subunit alpha	COPA_HUMAN	COPA	417.9	49	24.59
ATP synthase subunit O, mitochondrial	ATPO_HUMAN	ATP5O	410.7	49	47.42
Poly(rC)-binding protein 2	PCBP2_HUMAN	PCBP2	602.2	48	58.36
Steroid hormone receptor ERR1	ERR1_HUMAN	ESRRA	529.2	48	60.99
Alpha-aminoadipic semialdehyde dehydrogenase	AL7A1_HUMAN	ALDH7A1	500.4	48	36.99
Tyrosine--tRNA ligase, cytoplasmic	SYYC_HUMAN	YARS	496.4	48	43.18
Nuclear pore complex protein Nup93	H3BVG0_HUMAN	NUP93	495.6	48	28.07
Mitochondrial-processing peptidase subunit alpha	MPPA_HUMAN	PMPCA	489.9	48	42.67
Aldehyde dehydrogenase X, mitochondrial	AL1B1_HUMAN	ALDH1B1	432.2	48	50.68
Mitochondrial ribonuclease P protein 1	MRRP1_HUMAN	TRMT10C	414.4	48	53.6
Phosphoenolpyruvate carboxykinase [GTP], mitochondrial	PCKGM_HUMAN	PCK2	411	48	41.25
2-oxoglutarate dehydrogenase, mitochondrial	ODO1_HUMAN	OGDH	397.7	48	28.84
Cytochrome c1, heme protein, mitochondrial	CY1_HUMAN	CYC1	489.9	47	51.08
Serine/arginine repetitive matrix protein 2	SRRM2_HUMAN	SRRM2	473.2	47	17.55
Procollagen galactosyltransferase 1	GT251_HUMAN	COLGALT1	449	47	33.28
Eukaryotic translation initiation factor 2A	EIF2A_HUMAN	EIF2A	443.4	47	38.12
Chromosome transmission fidelity protein 8 homolog isoform 2	CTF8A_HUMAN	CHTF8	429.1	47	79.01
Structural maintenance of chromosomes protein 4	SMC4_HUMAN	SMC4	421.4	47	26.94
Septin-11	SEP11_HUMAN	SEPT11	387.3	47	37.06
G-rich sequence factor 1	F5H5I6_HUMAN	GRSF1	376	47	58.73
Baculoviral IAP repeat-containing protein 6	BIRC6_HUMAN	BIRC6	345.3	47	17.48
Transmembrane 9 superfamily member 3	TM9S3_HUMAN	TM9SF3	337.1	47	26.32
Tubulin beta-6 chain	TBB6_HUMAN	TUBB6	513.4	46	42.15
3-hydroxyacyl-CoA dehydrogenase type-2	HCD2_HUMAN	HSD17B10	491.4	46	65.52
Isocitrate dehydrogenase [NAD] subunit beta, mitochondrial	IDH3B_HUMAN	IDH3B	445.6	46	56.1
Exocyst complex component 7	EXOC7_HUMAN	EXOC7	445.3	46	43.95
Protein TBRG4	TBRG4_HUMAN	TBRG4	409.1	46	30.59
Pyruvate dehydrogenase protein X component, mitochondrial	ODPX_HUMAN	PDHX	405.9	46	45.11
Peptidyl-prolyl cis-trans isomerase FKBP8	FKBP8_HUMAN	FKBP8	374.4	46	36.41
Protein kinase C and casein kinase substrate in neurons protein 2	PACN2_HUMAN	PACSIN2	549.3	45	34.61
ATP-dependent Clp protease proteolytic subunit, mitochondrial	CLPP_HUMAN	CLPP	500.7	45	42.6
Mitochondrial import inner membrane translocase subunit TIM50	TIM50_HUMAN	TIMM50	482.2	45	36.62
Methylcrotonoyl-CoA carboxylase beta chain, mitochondrial	MCCB_HUMAN	MCCC2	464.5	45	50.62
Negative elongation factor B	A0A0X1KG71_HUMAN	NELFB	447	45	32.48
ATP-dependent RNA helicase SUPV3L1, mitochondrial	SUV3_HUMAN	SUPV3L1	394.8	45	27.74
Eukaryotic translation initiation factor 2 subunit 2	IF2B_HUMAN	EIF2S2	393	45	40.84
Basement membrane-specific heparan sulfate proteoglycan core protein	PGBM_HUMAN	HSPG2	353.6	45	13.46
Exportin-1	XPO1_HUMAN	XPO1	530.8	44	29.41
Sorting nexin-1	SNX1_HUMAN	SNX1	527.2	44	37.55
Unconventional myosin-Ic	MYO1C_HUMAN	MYO1C	515	44	27.09
UDP-glucose:glycoprotein glucosyltransferase 1	UGGG1_HUMAN	UGGT1	503.8	44	23.54
Nucleophosmin	NPM_HUMAN	NPM1	446	44	36.73
Filamin-A	FLNA_HUMAN	FLNA	439.8	44	19.34
Elongation factor 1-delta	EF1D_HUMAN	EEF1D	439.1	44	36.17
Ras-related protein Rab-5C	RAB5C_HUMAN	RAB5C	436.8	44	55.42
Double-stranded RNA-binding protein Staufen homolog 1	STAU1_HUMAN	STAU1	427.6	44	38.65
Serine/threonine-protein kinase A-Raf	ARAF_HUMAN	ARAF	405.1	44	29.54
DnaJ homolog subfamily C member 7	DNJC7_HUMAN	DNAJC7	399.1	44	30.57
NADH-cytochrome b5 reductase 3	NB5R3_HUMAN	CYB5R3	384.6	44	54.15
Plasma membrane calcium-transporting ATPase 1	AT2B1_HUMAN	ATP2B1	356.1	44	27.94
LIM domain and actin-binding protein 1	LIMA1_HUMAN	LIMA1	340.9	44	25.96
E3 ubiquitin-protein ligase UBR4	UBR4_HUMAN	UBR4	303.1	44	12.75
Pericentrin	PCNT_HUMAN	PCNT	267	44	17.09
UV excision repair protein RAD23 homolog B	RD23B_HUMAN	RAD23B	551.3	43	44.01
Reticulocalbin-2	RCN2_HUMAN	RCN2	493.6	43	80.13
Delta(3,5)-Delta(2,4)-dienoyl-CoA isomerase, mitochondrial	ECH1_HUMAN	ECH1	480.9	43	47.56
RNA-binding protein 39	RBM39_HUMAN	RBM39	480.2	43	27.36
Mannosyl-oligosaccharide glucosidase	MOGS_HUMAN	MOGS	463	43	35.84
TBC1 domain family member 15	TBC15_HUMAN	TBC1D15	447.5	43	43.42
Serine/threonine-protein kinase 26	STK26_HUMAN	STK26	416.5	43	52.16
Very-long-chain enoyl-CoA reductase	TECR_HUMAN	TECR	402.3	43	30.52
E1A-binding protein p400	EP400_HUMAN	EP400	391.4	43	27.51
Sorting and assembly machinery component 50 homolog	SAM50_HUMAN	SAMM50	372.9	43	45.2
Protein arginine N-methyltransferase 5	ANM5_HUMAN	PRMT5	368.6	43	29.83
Probable ubiquitin carboxyl-terminal hydrolase FAF-X	USP9X_HUMAN	USP9X	368.1	43	18.68
Transitional endoplasmic reticulum ATPase	TERA_HUMAN	VCP	346.4	43	33.25
Striated muscle preferentially expressed protein kinase	SPEG_HUMAN	SPEG	332	43	14.88
Ubiquilin-2	UBQL2_HUMAN	UBQLN2	496	42	34.62
NAD-dependent malic enzyme, mitochondrial	MAOM_HUMAN	ME2	482.3	42	45.72
14-3-3 protein epsilon	1433E_HUMAN	YWHAE	444.8	42	73.73
Serine/threonine-protein phosphatase 2A 65 kDa regulatory subunit A alpha isoform	2AAA_HUMAN	PPP2R1A	437.6	42	36.5
KIF1-binding protein	KBP_HUMAN	KIF1BP	415.6	42	32.21
Drebrin	DREB_HUMAN	DBN1	415.3	42	34.96
Ras-related protein Rab-11B	RB11B_HUMAN	RAB11B	406.8	42	60.55
Glyceraldehyde-3-phosphate dehydrogenase	G3P_HUMAN	GAPDH	388.3	42	62.09
N-acetylgalactosaminyltransferase 7	GALT7_HUMAN	GALNT7	388	42	30.44
Transcriptional repressor p66-alpha	P66A_HUMAN	GATAD2A	374	42	42.5
ATP-dependent DNA helicase Q1	RECQ1_HUMAN	RECQL	357.1	42	25.12
ATP-binding cassette sub-family F member 3	ABCF3_HUMAN	ABCF3	512.4	41	37.66
Neutral amino acid transporter B(0)	AAAT_HUMAN	SLC1A5	509.7	41	36.6
Glycine dehydrogenase (decarboxylating), mitochondrial	GCSP_HUMAN	GLDC	496.4	41	31.27
Mitochondrial import inner membrane translocase subunit TIM44	TIM44_HUMAN	TIMM44	469.9	41	33.85
Tyrosine-protein phosphatase non-receptor type 11	PTN11_HUMAN	PTPN11	451.2	41	29.31
10 kDa heat shock protein, mitochondrial	CH10_HUMAN	HSPE1	450.5	41	73.53
Enoyl-CoA hydratase, mitochondrial	ECHM_HUMAN	ECHS1	441.3	41	46.21
Pre-mRNA-processing factor 19	PRP19_HUMAN	PRPF19	408.7	41	31.15
ATP-binding cassette sub-family F member 1	ABCF1_HUMAN	ABCF1	395.8	41	26.39
NADH dehydrogenase [ubiquinone] flavoprotein 3, mitochondrial	NDUV3_HUMAN	NDUFV3	380.7	41	39.53
Bromodomain-containing protein 4	BRD4_HUMAN	BRD4	346.7	41	28.85
Microtubule-associated protein	E7EVA0_HUMAN	MAP4	341.6	41	17.46
Puromycin-sensitive aminopeptidase	PSA_HUMAN	NPEPPS	523.1	40	29.38
Histone H1.4	H14_HUMAN	HIST1H1E	487.1	40	32.42
Interferon-induced, double-stranded RNA-activated protein kinase	E2AK2_HUMAN	EIF2AK2	464.2	40	28.68
ER membrane protein complex subunit 1	EMC1_HUMAN	EMC1	454.1	40	22.18
Dynactin subunit 2	DCTN2_HUMAN	DCTN2	453.7	40	47.63
Glycine--tRNA ligase	SYG_HUMAN	GARS	441.1	40	39.11
Polymerase delta-interacting protein 3	PDIP3_HUMAN	POLDIP3	439.5	40	49.17
Hypoxia up-regulated protein 1	HYOU1_HUMAN	HYOU1	409.3	40	41.64
Splicing factor 1	SF01_HUMAN	SF1	408.5	40	42.01
Very-long-chain 3-oxoacyl-CoA reductase	DHB12_HUMAN	HSD17B12	405.7	40	54.81
Cytosol aminopeptidase	AMPL_HUMAN	LAP3	393.2	40	30.25
Signal recognition particle receptor subunit alpha	SRPRA_HUMAN	SRPRA	388.4	40	36.83
Atypical kinase ADCK3, mitochondrial	ADCK3_HUMAN	ADCK3	387.6	40	43.12
Transferrin receptor protein 1	TFR1_HUMAN	TFRC	382.7	40	31.84
Ubiquitin-like modifier-activating enzyme 1	UBA1_HUMAN	UBA1	374.8	40	22.02
Pyruvate dehydrogenase E1 component subunit alpha, somatic form, mitochondrial	ODPA_HUMAN	PDHA1	368.4	40	39.74
Centrosomal protein of 55 kDa	CEP55_HUMAN	CEP55	359.6	40	33.19
Tyrosine-protein kinase Lyn	LYN_HUMAN	LYN	348.1	40	36.72
Alpha-enolase	ENOA_HUMAN	ENO1	347.8	40	50.23
E3 ubiquitin-protein ligase MYCBP2	MYCB2_HUMAN	MYCBP2	280.3	40	11.9
Nuclear mitotic apparatus protein 1	NUMA1_HUMAN	NUMA1	667.1	39	15.18
E3 ubiquitin-protein ligase TRIM32	TRI32_HUMAN	TRIM32	566.5	39	34.92
NADH dehydrogenase [ubiquinone] iron-sulfur protein 3, mitochondrial	NDUS3_HUMAN	NDUFS3	507.5	39	56.82
Transmembrane emp24 domain-containing protein 10	TMEDA_HUMAN	TMED10	502.8	39	51.6
Eukaryotic translation initiation factor 3 subunit E	EIF3E_HUMAN	EIF3E	401.4	39	40
Protein TFG	TFG_HUMAN	TFG	395.5	39	39.5
Serine/threonine-protein kinase PAK 1	PAK1_HUMAN	PAK1	381.9	39	37.8
Very-long-chain (3R)-3-hydroxyacyl-CoA dehydratase 3	HACD3_HUMAN	HACD3	376.5	39	37.85
Vigilin	VIGLN_HUMAN	HDLBP	376.1	39	22.79
TRIO and F-actin-binding protein	TARA_HUMAN	TRIOBP	367	39	16.24
Vesicle-associated membrane protein-associated protein A	VAPA_HUMAN	VAPA	352	39	44.56
Low-density lipoprotein receptor-related protein 2	LRP2_HUMAN	LRP2	307.4	39	7.11
Hydroxyacyl-coenzyme A dehydrogenase, mitochondrial	HCDH_HUMAN	HADH	629.8	38	49.49
Constitutive coactivator of PPAR-gamma-like protein 1	F120A_HUMAN	FAM120A	490.8	38	21.2
Medium-chain specific acyl-CoA dehydrogenase, mitochondrial	ACADM_HUMAN	ACADM	464.3	38	45.84
Manganese-transporting ATPase 13A1	AT131_HUMAN	ATP13A1	415.4	38	23.84
Protein transport protein Sec23A	SC23A_HUMAN	SEC23A	414	38	35.29
Lipoamide acyltransferase component of branched-chain alpha-keto acid dehydrogenase complex, mitochondrial	ODB2_HUMAN	DBT	410.6	38	32.16
AFG3-like protein 2	AFG32_HUMAN	AFG3L2	408.9	38	28.98
Dolichol-phosphate mannosyltransferase subunit 1	Q5QPK2_HUMAN	DPM1	405.7	38	47.74
Phosphoglucomutase-2	PGM2_HUMAN	PGM2	372.4	38	29.41
Carboxypeptidase D	CBPD_HUMAN	CPD	357.2	38	17.61
Hsp90 co-chaperone Cdc37	CDC37_HUMAN	CDC37	550	37	37.3
Single-stranded DNA-binding protein, mitochondrial	SSBP_HUMAN	SSBP1	497.3	37	78.38
Putative RNA-binding protein Luc7-like 2	LC7L2_HUMAN	LUC7L2	449.3	37	29.85
NADH dehydrogenase [ubiquinone] 1 alpha subcomplex subunit 13	NDUAD_HUMAN	NDUFA13	446.2	37	43.24
Plakophilin-2	PKP2_HUMAN	PKP2	439.7	37	28.32
Transportin-1	TNPO1_HUMAN	TNPO1	414.2	37	39.87
Protein LYRIC	LYRIC_HUMAN	MTDH	405.3	37	44.16
Cytochrome c-type heme lyase	CCHL_HUMAN	HCCS	403.8	37	54.1
Coiled-coil domain-containing protein 191	CC191_HUMAN	CCDC191	383.2	37	5.77
Probable leucine--tRNA ligase, mitochondrial	SYLM_HUMAN	LARS2	356	37	29.01
Heterogeneous nuclear ribonucleoprotein L	HNRPL_HUMAN	HNRNPL	349.7	37	32.77
Nucleoside diphosphate kinase	Q32Q12_HUMAN	NME1-NME2	348.8	37	59.93
Dynein heavy chain 17, axonemal	DYH17_HUMAN	DNAH17	281.3	37	8.41
45 kDa calcium-binding protein	CAB45_HUMAN	SDF4	604.2	36	53.31
Transmembrane emp24 domain-containing protein 9	TMED9_HUMAN	TMED9	507.4	36	49.36
Electron transfer flavoprotein subunit alpha, mitochondrial	ETFA_HUMAN	ETFA	487.8	36	53.45
Alpha-taxilin	TXLNA_HUMAN	TXLNA	486.5	36	31.68
Protein SDE2 homolog	SDE2_HUMAN	SDE2	475.7	36	35.7
Reticulon-4	RTN4_HUMAN	RTN4	472	36	59.25
Interferon regulatory factor 2-binding protein 2	I2BP2_HUMAN	IRF2BP2	444.2	36	58.6
Probable ATP-dependent RNA helicase DDX41	DDX41_HUMAN	DDX41	434.3	36	29.26
Ras-related protein Rab-2A	RAB2A_HUMAN	RAB2A	429	36	60.38
Treacle protein	TCOF_HUMAN	TCOF1	422.7	36	20.01
Eukaryotic initiation factor 4A-III	IF4A3_HUMAN	EIF4A3	406.2	36	46.47
Fragile X mental retardation protein 1	FMR1_HUMAN	FMR1	399	36	31.82
Heat shock 70 kDa protein 1-like	HS71L_HUMAN	HSPA1L	398.4	36	13.1
Spindle assembly abnormal protein 6 homolog	SAS6_HUMAN	SASS6	366.7	36	35.16
AP-2 complex subunit alpha-2	AP2A2_HUMAN	AP2A2	364.7	36	28.11
Peptidyl-prolyl cis-trans isomerase FKBP10	FKB10_HUMAN	FKBP10	362.2	36	36.08
Proteasome-associated protein ECM29 homolog	J3KN16_HUMAN	KIAA0368	278	36	12.1
CLIP-associating protein 2	CLAP2_HUMAN	CLASP2	498.5	35	15.31
Activator of 90 kDa heat shock protein ATPase homolog 1	AHSA1_HUMAN	AHSA1	487.5	35	36.39
Metaxin-2	MTX2_HUMAN	MTX2	484.6	35	53.23
ADP-ribosylation factor 3	ARF3_HUMAN	ARF3	479.6	35	67.4
Glutamate-rich WD repeat-containing protein 1	GRWD1_HUMAN	GRWD1	478.8	35	22.42
Pyrroline-5-carboxylate reductase 2	P5CR2_HUMAN	PYCR2	475.3	35	47.19
Paraspeckle component 1	PSPC1_HUMAN	PSPC1	466	35	42.06
Forkhead box protein C1	FOXC1_HUMAN	FOXC1	438.1	35	63.29
Syntaxin-binding protein 2	STXB2_HUMAN	STXBP2	420.6	35	32.38
Sodium/potassium-transporting ATPase subunit beta-3	AT1B3_HUMAN	ATP1B3	413.8	35	39.43
Transforming protein RhoA	RHOA_HUMAN	RHOA	413.3	35	50.78
Eukaryotic translation initiation factor 3 subunit C-like protein	EIFCL_HUMAN	EIF3CL	412.8	35	21.88
ATP-dependent RNA helicase DDX1	DDX1_HUMAN	DDX1	412.1	35	22.57
tRNA (cytosine(34)-C(5))-methyltransferase	NSUN2_HUMAN	NSUN2	411.5	35	27.9
Caprin-1	CAPR1_HUMAN	CAPRIN1	409.4	35	38.36
NADH dehydrogenase [ubiquinone] 1 alpha subcomplex subunit 10, mitochondrial	NDUAA_HUMAN	NDUFA10	401.4	35	43.94
Dynactin subunit 1	E7EX90_HUMAN	DCTN1	395.9	35	24.76
Apoptosis inhibitor 5	API5_HUMAN	API5	382	35	33.02
Collagen alpha-2(I) chain	CO1A2_HUMAN	COL1A2	362.1	35	25.4
Zinc finger CCCH-type antiviral protein 1	ZCCHV_HUMAN	ZC3HAV1	339.6	35	21.95
Dystrophin	DMD_HUMAN	DMD	317.1	35	11.88
UBX domain-containing protein 7	UBXN7_HUMAN	UBXN7	505.8	34	47.65
Protein NEDD1	NEDD1_HUMAN	NEDD1	476.5	34	31.67
HAUS augmin-like complex subunit 5	HAUS5_HUMAN	HAUS5	469.8	34	31.12
Cleavage and polyadenylation specificity factor subunit 6	CPSF6_HUMAN	CPSF6	449.4	34	32.82
CDKN2A-interacting protein	CARF_HUMAN	CDKN2AIP	446.9	34	37.07
Creatine kinase B-type	KCRB_HUMAN	CKB	429.8	34	41.99
Bifunctional 3'-phosphoadenosine 5'-phosphosulfate synthase 2	PAPS2_HUMAN	PAPSS2	427.7	34	36.51
Cytochrome c oxidase subunit 5B, mitochondrial	COX5B_HUMAN	COX5B	426.9	34	53.49
DNA replication licensing factor MCM5	MCM5_HUMAN	MCM5	405.7	34	25.2
Tryptophan--tRNA ligase, cytoplasmic	SYWC_HUMAN	WARS	402.3	34	30.57
Heterogeneous nuclear ribonucleoprotein A1	ROA1_HUMAN	HNRNPA1	401.5	34	26.08
Acetyl-CoA carboxylase 1	ACACA_HUMAN	ACACA	397.2	34	11.62
Catenin delta-1	CTND1_HUMAN	CTNND1	386.6	34	23
PDZ and LIM domain protein 7	PDLI7_HUMAN	PDLIM7	366.9	34	47.7
Cdc42 effector protein 1	BORG5_HUMAN	CDC42EP1	361.1	34	34.9
Unconventional myosin-VI	A0A0D9SGC1_HUMAN	MYO6	340.2	34	22.1
Alpha-adducin	ADDA_HUMAN	ADD1	530.3	33	20.9
AP-3 complex subunit delta-1	AP3D1_HUMAN	AP3D1	500.4	33	20.47
ATP-dependent RNA helicase DDX18	DDX18_HUMAN	DDX18	488.7	33	23.28
Immunoglobulin lambda-like polypeptide 5	A0A0B4J231_HUMAN	IGLL5	487.4	33	33.02
Coiled-coil domain-containing protein 47	CCD47_HUMAN	CCDC47	458.2	33	31.06
Mitochondrial import receptor subunit TOM20 homolog	TOM20_HUMAN	TOMM20	443.8	33	40
Helicase-like transcription factor	HLTF_HUMAN	HLTF	438.6	33	20.81
Protein scribble homolog	SCRIB_HUMAN	SCRIB	429.3	33	27.42
SNW domain-containing protein 1	SNW1_HUMAN	SNW1	421.5	33	34.7
Peroxiredoxin-1	PRDX1_HUMAN	PRDX1	420.3	33	48.74
Threonine--tRNA ligase, mitochondrial	SYTM_HUMAN	TARS2	403.6	33	23.68
Poly(A) RNA polymerase, mitochondrial	PAPD1_HUMAN	MTPAP	394.2	33	38.14
Band 4.1-like protein 3	E41L3_HUMAN	EPB41L3	384.7	33	34.22
La-related protein 4	LARP4_HUMAN	LARP4	376	33	31.92
Ras GTPase-activating-like protein IQGAP2	IQGA2_HUMAN	IQGAP2	365.1	33	16.89
rRNA 2'-O-methyltransferase fibrillarin	FBRL_HUMAN	FBL	363.2	33	42.99
Glucose-6-phosphate isomerase	G6PI_HUMAN	GPI	359.9	33	31.46
DnaJ homolog subfamily A member 3, mitochondrial	DNJA3_HUMAN	DNAJA3	357.3	33	43.75
Importin-5	IPO5_HUMAN	IPO5	347.9	33	22.88
Calcium/calmodulin-dependent protein kinase type II subunit delta	E9PBG7_HUMAN	CAMK2D	340.3	33	39.65
Small subunit processome component 20 homolog	UTP20_HUMAN	UTP20	323.9	33	8.87
Immunity-related GTPase family Q protein	IRGQ_HUMAN	IRGQ	488.9	32	30.66
Protein phosphatase 1F	PPM1F_HUMAN	PPM1F	477.8	32	42.07
YTH domain-containing family protein 3	YTHD3_HUMAN	YTHDF3	465.2	32	21.71
Cytochrome c	CYC_HUMAN	CYCS	452.3	32	54.29
Tubulin beta-4A chain	TBB4A_HUMAN	TUBB4A	436.3	32	20.05
Calumenin	CALU_HUMAN	CALU	433.6	32	57.46
Caseinolytic peptidase B protein homolog	CLPB_HUMAN	CLPB	424.6	32	32.1
Tricarboxylate transport protein, mitochondrial	TXTP_HUMAN	SLC25A1	414.2	32	42.77
Fumarate hydratase, mitochondrial	FUMH_HUMAN	FH	414	32	42.35
Extended synaptotagmin-2	ESYT2_HUMAN	ESYT2	408.5	32	28.45
Structural maintenance of chromosomes protein 3	SMC3_HUMAN	SMC3	407.9	32	24.9
Nuclear RNA export factor 1	NXF1_HUMAN	NXF1	407.4	32	36.67
3-ketoacyl-CoA thiolase, mitochondrial	THIM_HUMAN	ACAA2	403.1	32	48.11
Electron transfer flavoprotein-ubiquinone oxidoreductase, mitochondrial	ETFD_HUMAN	ETFDH	398.8	32	22.85
Cyclin-dependent kinase 2	CDK2_HUMAN	CDK2	387.8	32	40.27
Mini-chromosome maintenance complex-binding protein	MCMBP_HUMAN	MCMBP	382.3	32	25.08
Ras-related protein Rab-6A	RAB6A_HUMAN	RAB6A	381.2	32	64.42
Hemoglobin subunit beta	HBB_HUMAN	HBB	370.2	32	64.63
Coiled-coil domain-containing protein 22	CCD22_HUMAN	CCDC22	369.6	32	32.7
Annexin A2	ANXA2_HUMAN	ANXA2	369.5	32	49.26
NADH dehydrogenase [ubiquinone] flavoprotein 1, mitochondrial	NDUV1_HUMAN	NDUFV1	367.2	32	35.13
Nucleoporin NDC1	NDC1_HUMAN	NDC1	354	32	15.58
Slit homolog 2 protein	SLIT2_HUMAN	SLIT2	341.9	32	11.84
Mitochondrial chaperone BCS1	BCS1_HUMAN	BCS1L	500.1	31	46.06
Reticulocalbin-1	RCN1_HUMAN	RCN1	485.2	31	48.94
Collagen alpha-1(XVIII) chain	COIA1_HUMAN	COL18A1	485.1	31	16.99
Vesicular integral-membrane protein VIP36	LMAN2_HUMAN	LMAN2	461.2	31	48.31
Eukaryotic translation initiation factor 3 subunit B	EIF3B_HUMAN	EIF3B	453.1	31	25.77
Pre-mRNA-splicing factor ATP-dependent RNA helicase DHX15	DHX15_HUMAN	DHX15	452.8	31	30.94
Proliferation-associated protein 2G4	PA2G4_HUMAN	PA2G4	444.9	31	42.64
Protein ATP5J2-PTCD1	G3V325_HUMAN	ATP5J2-PTCD1	443.7	31	11.62
Protein NipSnap homolog 2	NIPS2_HUMAN	GBAS	427.4	31	39.51
Afadin	AFAD_HUMAN	MLLT4	420.3	31	15.8
Kinesin light chain 1	KLC1_HUMAN	KLC1	402.4	31	28.5
Nucleobindin 2, isoform CRA_b	A0A087WSV8_HUMAN	NUCB2	399.8	31	51.67
ATP-dependent 6-phosphofructokinase, liver type	PFKAL_HUMAN	PFKL	399.3	31	29.62
Syntaxin-binding protein 3	STXB3_HUMAN	STXBP3	393.1	31	27.36
Methylmalonate-semialdehyde dehydrogenase [acylating], mitochondrial	MMSA_HUMAN	ALDH6A1	392.9	31	33.08
Dual specificity mitogen-activated protein kinase kinase 7	MP2K7_HUMAN	MAP2K7	392.5	31	33.41
Glutamine--tRNA ligase	SYQ_HUMAN	QARS	386.6	31	22.06
Thioredoxin domain-containing protein 5	TXND5_HUMAN	TXNDC5	383.6	31	37.73
Pre-mRNA-splicing factor RBM22	RBM22_HUMAN	RBM22	349.8	31	44.52
Flap endonuclease 1	FEN1_HUMAN	FEN1	345.3	31	38.16
La-related protein 1	LARP1_HUMAN	LARP1	338.9	31	24.18
Melanoma inhibitory activity protein 3	MIA3_HUMAN	MIA3	319.1	31	20.87
Uncharacterized protein KIAA2013	K2013_HUMAN	KIAA2013	306.3	31	20.03
Importin subunit alpha-5	IMA5_HUMAN	KPNA1	509.1	30	22.12
Probable ATP-dependent RNA helicase DDX59	DDX59_HUMAN	DDX59	486.6	30	30.86
DBIRD complex subunit ZNF326	ZN326_HUMAN	ZNF326	480.7	30	24.74
Double-stranded RNA-binding protein Staufen homolog 2	STAU2_HUMAN	STAU2	468.5	30	45.26
Brain acid soluble protein 1	BASP1_HUMAN	BASP1	448.9	30	73.57
2',5'-phosphodiesterase 12	PDE12_HUMAN	PDE12	446.9	30	19.21
Fatty acyl-CoA reductase 1	FACR1_HUMAN	FAR1	445.6	30	33.2
Tether containing UBX domain for GLUT4	ASPC1_HUMAN	ASPSCR1	440.9	30	54.97
Kinesin-like protein KIFC1	KIFC1_HUMAN	KIFC1	434.1	30	31.35
Protein lunapark	LNP_HUMAN	LNP	431.6	30	35.51
DnaJ homolog subfamily C member 10	DJC10_HUMAN	DNAJC10	428.8	30	35.56
Metaxin-1	MTX1_HUMAN	MTX1	425	30	31.33
Serine--tRNA ligase, mitochondrial	SYSM_HUMAN	SARS2	420.5	30	37.26
Centrosomal protein of 192 kDa	CE192_HUMAN	CEP192	418.9	30	8.83
Glucosidase 2 subunit beta	GLU2B_HUMAN	PRKCSH	411.5	30	43.18
A-kinase anchor protein 1, mitochondrial	AKAP1_HUMAN	AKAP1	406.6	30	32.78
Transcriptional repressor p66-beta	P66B_HUMAN	GATAD2B	400.2	30	40.13
Pentatricopeptide repeat domain-containing protein 3, mitochondrial	PTCD3_HUMAN	PTCD3	399.8	30	33.09
DNA replication licensing factor MCM6	MCM6_HUMAN	MCM6	388.6	30	22.9
ATP-binding cassette sub-family B member 10, mitochondrial	ABCBA_HUMAN	ABCB10	381.9	30	26.42
Sodium bicarbonate cotransporter 3	S4A7_HUMAN	SLC4A7	366.8	30	24.3
ATP-dependent zinc metalloprotease YME1L1	YMEL1_HUMAN	YME1L1	360.1	30	25.49
Microtubule-associated serine/threonine-protein kinase 4	MAST4_HUMAN	MAST4	359.9	30	16.57
Deoxynucleoside triphosphate triphosphohydrolase SAMHD1	SAMH1_HUMAN	SAMHD1	331.9	30	27.96
Dedicator of cytokinesis protein 7	DOCK7_HUMAN	DOCK7	302.8	30	8.13
Nascent polypeptide-associated complex subunit alpha, muscle-specific form	NACAM_HUMAN	NACA	292.7	30	24.35
Trinucleotide repeat-containing gene 18 protein	TNC18_HUMAN	TNRC18	266.3	30	16.75
DnaJ homolog subfamily A member 2	DNJA2_HUMAN	DNAJA2	608.3	29	39.56
V-type proton ATPase subunit H	VATH_HUMAN	ATP6V1H	586.4	29	31.47
Mitochondrial glutamate carrier 1	GHC1_HUMAN	SLC25A22	576.2	29	29.1
Acetolactate synthase-like protein	ILVBL_HUMAN	ILVBL	545.7	29	31.8
Dual specificity mitogen-activated protein kinase kinase 2	MP2K2_HUMAN	MAP2K2	534.6	29	39.5
N6-adenosine-methyltransferase 70 kDa subunit	MTA70_HUMAN	METTL3	515.3	29	29.48
Rhotekin	RTKN_HUMAN	RTKN	504	29	42.45
Tyrosine--tRNA ligase, mitochondrial	SYYM_HUMAN	YARS2	477.7	29	36.9
Malate dehydrogenase, mitochondrial	MDHM_HUMAN	MDH2	464.1	29	42.01
Mitogen-activated protein kinase kinase kinase kinase 4	E7ESS2_HUMAN	MAP4K4	458.2	29	20.42
Interleukin enhancer-binding factor 2	ILF2_HUMAN	ILF2	457.5	29	51.28
ADP-ribosylation factor-binding protein GGA2	GGA2_HUMAN	GGA2	455.7	29	43.56
CAAX prenyl protease 1 homolog	FACE1_HUMAN	ZMPSTE24	442.3	29	28
Mycophenolic acid acyl-glucuronide esterase, mitochondrial	ABHDA_HUMAN	ABHD10	441.3	29	59.15
Metastasis-associated protein MTA2	MTA2_HUMAN	MTA2	436.4	29	27.54
Succinyl-CoA:3-ketoacid coenzyme A transferase 1, mitochondrial	SCOT1_HUMAN	OXCT1	430.1	29	44.62
Dihydropyrimidinase-related protein 2	DPYL2_HUMAN	DPYSL2	421.1	29	30.07
Valine--tRNA ligase	SYVC_HUMAN	VARS	414.7	29	18.91
ATP synthase subunit d, mitochondrial	ATP5H_HUMAN	ATP5H	411	29	55.9
NADH-ubiquinone oxidoreductase chain 5	NU5M_HUMAN	MT-ND5	409.6	29	38.97
Emerin	EMD_HUMAN	EMD	407.9	29	52.36
Collagen alpha-1(II) chain	CO2A1_HUMAN	COL2A1	390.6	29	27.51
Epiplakin	EPIPL_HUMAN	EPPK1	388.9	29	7.56
Moesin	MOES_HUMAN	MSN	365.9	29	33.1
THAP domain-containing protein 5	THAP5_HUMAN	THAP5	362.1	29	12.66
Probable 2-oxoglutarate dehydrogenase E1 component DHKTD1, mitochondrial	DHTK1_HUMAN	DHTKD1	341.6	29	33.41
B-cell receptor-associated protein 31	BAP31_HUMAN	BCAP31	314.1	29	50.41
Splicing factor 3B subunit 2	SF3B2_HUMAN	SF3B2	293.7	29	17.88
U5 small nuclear ribonucleoprotein 200 kDa helicase	U520_HUMAN	SNRNP200	290.1	29	18.87
Syntaxin-7	STX7_HUMAN	STX7	596.6	28	71.97
ATP synthase subunit delta, mitochondrial	ATPD_HUMAN	ATP5D	480.3	28	79.76
Histone-binding protein RBBP4	RBBP4_HUMAN	RBBP4	472.1	28	16.24
Succinyl-CoA ligase [ADP/GDP-forming] subunit alpha, mitochondrial	SUCA_HUMAN	SUCLG1	469.7	28	37.86
Inactive tyrosine-protein kinase 7	PTK7_HUMAN	PTK7	460.8	28	25.51
Lanosterol 14-alpha demethylase	CP51A_HUMAN	CYP51A1	460.3	28	36.78
Structural maintenance of chromosomes protein 2	SMC2_HUMAN	SMC2	437.5	28	21.3
Alpha-tubulin N-acetyltransferase 1	ATAT_HUMAN	ATAT1	436.5	28	42.52
Unconventional myosin-Ib	MYO1B_HUMAN	MYO1B	423.3	28	18.22
Importin-7	IPO7_HUMAN	IPO7	421.6	28	17.82
Probable ATP-dependent RNA helicase DDX52	DDX52_HUMAN	DDX52	417.7	28	24.87
Inhibitor of nuclear factor kappa-B kinase-interacting protein	IKIP_HUMAN	IKBIP	402.2	28	44.83
Cytoplasmic dynein 1 intermediate chain 2	DC1I2_HUMAN	DYNC1I2	393.8	28	27.59
General vesicular transport factor p115	USO1_HUMAN	USO1	393.7	28	22.14
Kinesin-like protein KIF14	KIF14_HUMAN	KIF14	391.5	28	12.2
Guanine nucleotide-binding protein G(k) subunit alpha	GNAI3_HUMAN	GNAI3	386	28	33.05
Plastin-1	PLSI_HUMAN	PLS1	378.1	28	23.21
Cathepsin D	CATD_HUMAN	CTSD	376.7	28	36.65
Heterogeneous nuclear ribonucleoprotein R	HNRPR_HUMAN	HNRNPR	375.8	28	26.54
Far upstream element-binding protein 3	FUBP3_HUMAN	FUBP3	366.1	28	31.64
Protein NipSnap homolog 1	NIPS1_HUMAN	NIPSNAP1	360.4	28	38.38
Ran-binding protein 3	RANB3_HUMAN	RANBP3	356.3	28	26.81
Transmembrane protein 214	TM214_HUMAN	TMEM214	351.8	28	27.87
Protein PRRC2C	PRC2C_HUMAN	PRRC2C	347.4	28	15.85
Uncharacterized protein (Fragment)	M0QYT0_HUMAN		344.4	28	20.25
Dynamin-2	DYN2_HUMAN	DNM2	343.7	28	17.7
Interleukin enhancer-binding factor 3	ILF3_HUMAN	ILF3	319.3	28	25.5
Collagen alpha-5(IV) chain	CO4A5_HUMAN	COL4A5	304.9	28	33
Translation initiation factor eIF-2B subunit gamma	EI2BG_HUMAN	EIF2B3	501.4	27	25.44
Cytoplasmic dynein 1 light intermediate chain 2	DC1L2_HUMAN	DYNC1LI2	494.2	27	28.66
ATPase family AAA domain-containing protein 3B	ATD3B_HUMAN	ATAD3B	480.8	27	16.67
Arginine and glutamate-rich protein 1	ARGL1_HUMAN	ARGLU1	468.7	27	24.91
Cat eye syndrome critical region protein 5	CECR5_HUMAN	CECR5	453.8	27	39.24
Isocitrate dehydrogenase [NADP], mitochondrial	IDHP_HUMAN	IDH2	441.1	27	33.19
Acyl-CoA synthetase family member 3, mitochondrial	ACSF3_HUMAN	ACSF3	439.9	27	31.94
Acyl-coenzyme A thioesterase 9, mitochondrial	ACOT9_HUMAN	ACOT9	431.6	27	36.45
Heterogeneous nuclear ribonucleoproteins C1/C2	B4DY08_HUMAN	HNRNPC	426.1	27	39.58
Mitogen-activated protein kinase kinase kinase 7	M3K7_HUMAN	MAP3K7	413.6	27	30.05
Basic helix-loop-helix domain-containing protein USF3	USF3_HUMAN	USF3	409.8	27	27.13
Prenylcysteine oxidase 1	PCYOX_HUMAN	PCYOX1	391.7	27	27.92
Fermitin family homolog 2	FERM2_HUMAN	FERMT2	389.4	27	27.51
Spectrin beta chain, non-erythrocytic 2	SPTN2_HUMAN	SPTBN2	388.2	27	11.13
E3 ubiquitin/ISG15 ligase TRIM25	TRI25_HUMAN	TRIM25	386.4	27	22.7
Cytochrome c oxidase assembly protein COX15 homolog	COX15_HUMAN	COX15	385.4	27	32.2
Tubulin-specific chaperone E	TBCE_HUMAN	TBCE	380.5	27	36.05
Guanine nucleotide-binding protein-like 1	GNL1_HUMAN	GNL1	380.3	27	22.73
Src substrate cortactin	SRC8_HUMAN	CTTN	380.2	27	33.45
Protein PRRC2A	PRC2A_HUMAN	PRRC2A	372.5	27	18.65
Serologically defined colon cancer antigen 3	SDCG3_HUMAN	SDCCAG3	372.2	27	43.22
Methylmalonyl-CoA mutase, mitochondrial	MUTA_HUMAN	MUT	367.8	27	34.4
Oxysterol-binding protein-related protein 8	OSBL8_HUMAN	OSBPL8	364.8	27	21.15
Nuclear pore complex protein Nup98-Nup96	NUP98_HUMAN	NUP98	350.4	27	33.96
FACT complex subunit SSRP1	SSRP1_HUMAN	SSRP1	349.9	27	19.04
Suprabasin	SBSN_HUMAN	SBSN	339.2	27	38.47
Double-strand break repair protein MRE11A	MRE11_HUMAN	MRE11A	311.1	27	23.53
Twinkle protein, mitochondrial	PEO1_HUMAN	PEO1	296.3	27	30.7
Pre-mRNA-processing-splicing factor 8	PRP8_HUMAN	PRPF8	294.3	27	7.71
Golgin subfamily A member 3	GOGA3_HUMAN	GOLGA3	270.1	27	19.14
Neurochondrin	NCDN_HUMAN	NCDN	533.4	26	32.65
Tubulin gamma-1 chain	TBG1_HUMAN	TUBG1	518.4	26	28.82
Translation initiation factor eIF-2B subunit delta	EI2BD_HUMAN	EIF2B4	484.8	26	36.71
Calcium-binding mitochondrial carrier protein SCaMC-1	SCMC1_HUMAN	SLC25A24	482.1	26	33.54
Exocyst complex component 5	A0A0A0MSI8_HUMAN	EXOC5	475	26	20.82
SLAIN motif-containing protein 1	SLAI1_HUMAN	SLAIN1	472.4	26	51.06
HEAT repeat-containing protein 3	HEAT3_HUMAN	HEATR3	472.3	26	36.62
CCR4-NOT transcription complex subunit 1	CNOT1_HUMAN	CNOT1	470.1	26	14.52
Protein kinase C delta type	KPCD_HUMAN	PRKCD	464	26	25.15
Kinesin light chain 4	KLC4_HUMAN	KLC4	454	26	23.1
Atherin	SAMD1_HUMAN	SAMD1	443.4	26	39.96
Synembryn-A	RIC8A_HUMAN	RIC8A	441.2	26	28.3
Erlin-2	ERLN2_HUMAN	ERLIN2	429.4	26	51.62
Rho guanine nucleotide exchange factor 2	ARHG2_HUMAN	ARHGEF2	428.7	26	18.58
Cytoplasmic FMR1-interacting protein 2	CYFP2_HUMAN	CYFIP2	420.2	26	18.15
Vacuolar protein sorting-associated protein 4A	VPS4A_HUMAN	VPS4A	411.9	26	28.6
Heterogeneous nuclear ribonucleoprotein A0	ROA0_HUMAN	HNRNPA0	411.7	26	30.49
Glutathione S-transferase kappa 1	GSTK1_HUMAN	GSTK1	411.5	26	48.23
Tyrosine-protein kinase BAZ1B	BAZ1B_HUMAN	BAZ1B	410.5	26	16.59
Nucleosome assembly protein 1-like 1	NP1L1_HUMAN	NAP1L1	404.4	26	30.95
Histidine--tRNA ligase, cytoplasmic	SYHC_HUMAN	HARS	403	26	33.2
Thioredoxin-related transmembrane protein 1	TMX1_HUMAN	TMX1	402.9	26	35
Chloride channel CLIC-like protein 1	CLCC1_HUMAN	CLCC1	375.1	26	27.4
UBX domain-containing protein 4	UBXN4_HUMAN	UBXN4	371.5	26	18.9
Translocation protein SEC62	SEC62_HUMAN	SEC62	370.6	26	16.29
Eukaryotic translation initiation factor 4 gamma 2	IF4G2_HUMAN	EIF4G2	370	26	20.29
Hydroxysteroid dehydrogenase-like protein 2	HSDL2_HUMAN	HSDL2	362.8	26	39.95
Cleavage and polyadenylation specificity factor subunit 3	CPSF3_HUMAN	CPSF3	359.2	26	37.72
Sperm-specific antigen 2	SSFA2_HUMAN	SSFA2	356.8	26	11.68
Conserved oligomeric Golgi complex subunit 6	COG6_HUMAN	COG6	355.2	26	29.83
E3 UFM1-protein ligase 1	UFL1_HUMAN	UFL1	324.1	26	25.44
Long-chain fatty acid transport protein 4	S27A4_HUMAN	SLC27A4	321.2	26	20.53
Cation-independent mannose-6-phosphate receptor	MPRI_HUMAN	IGF2R	296.7	26	9.59
Centromere protein F	CENPF_HUMAN	CENPF	285.2	26	10.34
Protein 4.1	41_HUMAN	EPB41	277.9	26	22.11
Mitochondrial import receptor subunit TOM40 homolog	TOM40_HUMAN	TOMM40	698.2	25	45.15
FAS-associated factor 1	FAF1_HUMAN	FAF1	527.7	25	26.46
Alpha-aminoadipic semialdehyde synthase, mitochondrial	AASS_HUMAN	AASS	491.2	25	20.3
Zyxin	ZYX_HUMAN	ZYX	490.6	25	42.48
Alpha-actinin-1	ACTN1_HUMAN	ACTN1	465.3	25	21.08
Rho GDP-dissociation inhibitor 1 (Fragment)	J3KTF8_HUMAN	ARHGDIA	448	25	45.88
Rac GTPase-activating protein 1	RGAP1_HUMAN	RACGAP1	440	25	29.43
Signal recognition particle receptor subunit beta	SRPRB_HUMAN	SRPRB	439.6	25	46.86
Transcription factor A, mitochondrial	TFAM_HUMAN	TFAM	437	25	39.84
Creatine kinase U-type, mitochondrial	KCRU_HUMAN	CKMT1A	431.8	25	40.53
Exosome complex exonuclease RRP44	RRP44_HUMAN	DIS3	428.7	25	26.93
Vacuolar protein sorting-associated protein 33A	VP33A_HUMAN	VPS33A	424	25	25.5
[3-methyl-2-oxobutanoate dehydrogenase [lipoamide]] kinase, mitochondrial	BCKD_HUMAN	BCKDK	421.1	25	30.1
Calpain-2 catalytic subunit	CAN2_HUMAN	CAPN2	416.8	25	17.43
Golgi integral membrane protein 4	GOLI4_HUMAN	GOLIM4	413	25	30.17
Mastermind-like protein 2	MAML2_HUMAN	MAML2	400.3	25	53.55
Gamma-taxilin	TXLNG_HUMAN	TXLNG	399.7	25	24.81
Procollagen-lysine,2-oxoglutarate 5-dioxygenase 1	PLOD1_HUMAN	PLOD1	389.2	25	21.46
RAF proto-oncogene serine/threonine-protein kinase	RAF1_HUMAN	RAF1	388.2	25	21.91
Guanine nucleotide-binding protein-like 3-like protein	GNL3L_HUMAN	GNL3L	387.8	25	24.4
NADPH:adrenodoxin oxidoreductase, mitochondrial	ADRO_HUMAN	FDXR	387.4	25	27.39
Fatty aldehyde dehydrogenase	AL3A2_HUMAN	ALDH3A2	378	25	19.79
Far upstream element-binding protein 2	A0A087WTP3_HUMAN	KHSRP	376.1	25	18
ADP/ATP translocase 1	ADT1_HUMAN	SLC25A4	374.9	25	20.81
Golgi reassembly-stacking protein 2	GORS2_HUMAN	GORASP2	374.7	25	65.27
Ataxin-10	ATX10_HUMAN	ATXN10	370.5	25	35.16
Desmoglein-2	DSG2_HUMAN	DSG2	363	25	17.98
CWF19-like protein 1	C19L1_HUMAN	CWF19L1	354.7	25	31.78
Heterogeneous nuclear ribonucleoprotein F	HNRPF_HUMAN	HNRNPF	353.8	25	36.87
DNA mismatch repair protein Msh6	MSH6_HUMAN	MSH6	345.7	25	20.96
Glycerol kinase	GLPK_HUMAN	GK	306	25	36.14
Bifunctional methylenetetrahydrofolate dehydrogenase/cyclohydrolase, mitochondrial	MTDC_HUMAN	MTHFD2	530.9	24	49.71
Vesicle-trafficking protein SEC22b	SC22B_HUMAN	SEC22B	529	24	53.95
PRA1 family protein 3	PRAF3_HUMAN	ARL6IP5	478.5	24	71.81
ATPase family AAA domain-containing protein 1	ATAD1_HUMAN	ATAD1	476.7	24	37.67
TBC1 domain family member 23	TBC23_HUMAN	TBC1D23	473.1	24	27.75
SHC-transforming protein 1	SHC1_HUMAN	SHC1	464.4	24	30.87
Neurolysin, mitochondrial	NEUL_HUMAN	NLN	462.8	24	23.72
Isocitrate dehydrogenase [NAD] subunit alpha, mitochondrial	IDH3A_HUMAN	IDH3A	456.1	24	36.34
ELAV-like protein 1	ELAV1_HUMAN	ELAVL1	443.9	24	42.94
RNA-binding protein MEX3A	MEX3A_HUMAN	MEX3A	441.8	24	27.31
CD166 antigen	CD166_HUMAN	ALCAM	435.4	24	19.38
Integrin beta-1	ITB1_HUMAN	ITGB1	423.3	24	19.3
NF-kappa-B-repressing factor	NKRF_HUMAN	NKRF	422.7	24	32.32
Probable glutamate--tRNA ligase, mitochondrial	SYEM_HUMAN	EARS2	422.6	24	21.99
STIM1L	G0XQ39_HUMAN	STIM1	419.8	24	22.25
LEM domain-containing protein 2	LEMD2_HUMAN	LEMD2	419.3	24	28.63
Guanine nucleotide-binding protein subunit alpha-11	GNA11_HUMAN	GNA11	415.5	24	32.03
4F2 cell-surface antigen heavy chain	4F2_HUMAN	SLC3A2	410	24	38.73
Tyrosine-protein phosphatase non-receptor type 1	PTN1_HUMAN	PTPN1	400.7	24	36.55
FAST kinase domain-containing protein 2	FAKD2_HUMAN	FASTKD2	397.1	24	24.37
GTPase-activating protein and VPS9 domain-containing protein 1	GAPD1_HUMAN	GAPVD1	394.4	24	20.7
Katanin p80 WD40 repeat-containing subunit B1	KTNB1_HUMAN	KATNB1	390.7	24	36.95
Bifunctional purine biosynthesis protein PURH	PUR9_HUMAN	ATIC	386.8	24	34.12
Myosin light polypeptide 6	MYL6_HUMAN	MYL6	386.6	24	45.03
Spliceosome RNA helicase DDX39B	DX39B_HUMAN	DDX39B	378.3	24	31.54
Probable RNA-binding protein 23	RBM23_HUMAN	RBM23	377.8	24	30.26
Guanine nucleotide-binding protein G(s) subunit alpha isoforms XLas	GNAS1_HUMAN	GNAS	375.7	24	37.22
NADH dehydrogenase [ubiquinone] 1 alpha subcomplex subunit 12	NDUAC_HUMAN	NDUFA12	372.4	24	75.17
Absent in melanoma 1 protein	A0A0J9YWL0_HUMAN	AIM1	368.1	24	17.64
Dimethyladenosine transferase 1, mitochondrial	TFB1M_HUMAN	TFB1M	364.6	24	38.15
5'-AMP-activated protein kinase catalytic subunit alpha-1	AAPK1_HUMAN	PRKAA1	356.4	24	28.22
Very long-chain specific acyl-CoA dehydrogenase, mitochondrial	ACADV_HUMAN	ACADVL	350.3	24	33.19
Vacuolar protein sorting-associated protein 45	VPS45_HUMAN	VPS45	339	24	35.44
Glucose-6-phosphate 1-dehydrogenase	G6PD_HUMAN	G6PD	331.9	24	29.95
Cell division cycle 7-related protein kinase	CDC7_HUMAN	CDC7	330.3	24	28.05
Coatomer subunit beta'	COPB2_HUMAN	COPB2	306.4	24	22.96
Nuclear pore complex protein Nup214	NU214_HUMAN	NUP214	293.8	24	24.9
Serine-protein kinase ATM	ATM_HUMAN	ATM	285.8	24	7.4
UPF0609 protein C4orf27	CD027_HUMAN	C4orf27	252.9	24	36.71
Estrogen-related receptor gamma	ERR3_HUMAN	ESRRG	520	23	30.79
Glycogen synthase kinase-3 alpha	GSK3A_HUMAN	GSK3A	510.6	23	37.47
Protein FAM162A	F162A_HUMAN	FAM162A	492.9	23	49.35
L-lactate dehydrogenase B chain	LDHB_HUMAN	LDHB	490.2	23	43.71
Kinetochore protein NDC80 homolog	NDC80_HUMAN	NDC80	455.5	23	27.26
NADH dehydrogenase [ubiquinone] iron-sulfur protein 7, mitochondrial	NDUS7_HUMAN	NDUFS7	454.5	23	36.62
Eukaryotic translation initiation factor 2D	EIF2D_HUMAN	EIF2D	453.7	23	39.38
Lamina-associated polypeptide 2, isoform alpha	LAP2A_HUMAN	TMPO	452.6	23	19.74
Transcription factor p65	TF65_HUMAN	RELA	442.2	23	45.55
Interleukin-1 receptor-associated kinase 1	IRAK1_HUMAN	IRAK1	432.6	23	40.31
Tight junction protein ZO-1	ZO1_HUMAN	TJP1	432.4	23	9.84
5'-AMP-activated protein kinase subunit gamma-2	AAKG2_HUMAN	PRKAG2	429.4	23	31.11
Golgin subfamily A member 2	GOGA2_HUMAN	GOLGA2	428.6	23	21.66
Mimitin, mitochondrial	MIMIT_HUMAN	NDUFAF2	426.5	23	58.58
DNA-directed RNA polymerase III subunit RPC3	RPC3_HUMAN	POLR3C	418	23	37.27
Eyes absent homolog 3	EYA3_HUMAN	EYA3	414.1	23	44.15
Rho guanine nucleotide exchange factor 7	ARHG7_HUMAN	ARHGEF7	410.8	23	17.77
Importin-4	IPO4_HUMAN	IPO4	409.5	23	20.44
Nucleolar protein 58	NOP58_HUMAN	NOP58	405.6	23	31.38
Proline and serine-rich protein 2	PRSR2_HUMAN	PROSER2	396.3	23	36.78
IQ calmodulin-binding motif-containing protein 1	IQCB1_HUMAN	IQCB1	392.5	23	27.42
tRNA pseudouridine synthase A, mitochondrial	TRUA_HUMAN	PUS1	389.9	23	30.21
Mitochondrial intermediate peptidase	MIPEP_HUMAN	MIPEP	388.3	23	25.67
Leucine-rich repeat-containing protein 41	LRC41_HUMAN	LRRC41	385.7	23	20.94
Cleavage stimulation factor subunit 2	E7EWR4_HUMAN	CSTF2	383.5	23	37.19
Acyl-CoA dehydrogenase family member 10	ACD10_HUMAN	ACAD10	380.3	23	14.5
Cofilin-1	COF1_HUMAN	CFL1	379	23	53.01
Histone-lysine N-methyltransferase setd3	SETD3_HUMAN	SETD3	378.9	23	31.31
Neural Wiskott-Aldrich syndrome protein	WASL_HUMAN	WASL	378.7	23	36.24
Collagen type IV alpha-3-binding protein	C43BP_HUMAN	COL4A3BP	374	23	24.2
Putative helicase MOV-10	MOV10_HUMAN	MOV10	365.4	23	15.15
Nuclear fragile X mental retardation-interacting protein 2	NUFP2_HUMAN	NUFIP2	360	23	51.8
Desmoglein-1	DSG1_HUMAN	DSG1	358.7	23	25.64
SRA stem-loop-interacting RNA-binding protein, mitochondrial	SLIRP_HUMAN	SLIRP	356.8	23	58.88
Agrin	A0A087X208_HUMAN	AGRN	356.7	23	17.88
Dolichyl-diphosphooligosaccharide--protein glycosyltransferase subunit STT3B	STT3B_HUMAN	STT3B	356.5	23	10.53
Regulator of nonsense transcripts 3B	REN3B_HUMAN	UPF3B	356.4	23	22.98
Protein RCC2	RCC2_HUMAN	RCC2	354	23	15.71
Forkhead box protein K2	FOXK2_HUMAN	FOXK2	352.1	23	42.02
Septin-7	E7EPK1_HUMAN	SEPT7	339.7	23	31.35
Telomere-associated protein RIF1	RIF1_HUMAN	RIF1	327.7	23	13.03
Phospholipase D3	PLD3_HUMAN	PLD3	324.3	23	35.31
Exonuclease 3'-5' domain-containing protein 2	EXD2_HUMAN	EXD2	318.2	23	26.41
Y-box-binding protein 3	YBOX3_HUMAN	YBX3	315.4	23	43.55
Nuclear protein localization protein 4 homolog	NPL4_HUMAN	NPLOC4	314.1	23	28.53
U3 small nucleolar RNA-associated protein 18 homolog	UTP18_HUMAN	UTP18	303.6	23	14.75
Laminin subunit gamma-1	LAMC1_HUMAN	LAMC1	303	23	14.54
Multiple PDZ domain protein	MPDZ_HUMAN	MPDZ	296.7	23	17.73
Zinc finger SWIM domain-containing protein 8	ZSWM8_HUMAN	ZSWIM8	288.4	23	15.7
DnaJ homolog subfamily C member 13	DJC13_HUMAN	DNAJC13	265	23	7.22
Collagen alpha-2(V) chain	CO5A2_HUMAN	COL5A2	248.2	23	25.48
Acyl-coenzyme A thioesterase 2, mitochondrial	ACOT2_HUMAN	ACOT2	561	22	30.43
Cisplatin resistance-associated overexpressed protein, isoform CRA_b	J3KPP4_HUMAN	LUC7L3	554.1	22	20.25
NADH dehydrogenase [ubiquinone] 1 alpha subcomplex subunit 8	NDUA8_HUMAN	NDUFA8	508.2	22	40.7
Secretory carrier-associated membrane protein 3	SCAM3_HUMAN	SCAMP3	505.6	22	36.89
BAG family molecular chaperone regulator 2	BAG2_HUMAN	BAG2	475.2	22	56.4
Kinesin-like protein KIF22	KIF22_HUMAN	KIF22	471.7	22	24.96
Spermatogenesis-associated serine-rich protein 2	SPAS2_HUMAN	SPATS2	466.5	22	44.59
Unconventional myosin-Id	MYO1D_HUMAN	MYO1D	465.2	22	14.71
Spermatogenesis-associated protein 5-like protein 1	SPA5L_HUMAN	SPATA5L1	455	22	23.11
Sorting nexin-9	SNX9_HUMAN	SNX9	447.2	22	24.03
Lysophosphatidylcholine acyltransferase 1	PCAT1_HUMAN	LPCAT1	446.3	22	32.77
Serine/threonine-protein kinase Chk1	CHK1_HUMAN	CHEK1	442.1	22	30.46
Nucleosome assembly protein 1-like 4	NP1L4_HUMAN	NAP1L4	433.3	22	40.41
Elongation factor Ts, mitochondrial	EFTS_HUMAN	TSFM	431.7	22	32.92
Serine palmitoyltransferase 1	SPTC1_HUMAN	SPTLC1	419.5	22	27.27
Protein transport protein Sec31A	SC31A_HUMAN	SEC31A	407.1	22	32.51
Cytochrome b-c1 complex subunit Rieske, mitochondrial	UCRI_HUMAN	UQCRFS1	404.6	22	37.96
ATP synthase subunit g, mitochondrial	ATP5L_HUMAN	ATP5L	402.4	22	66.02
Translocon-associated protein subunit delta	SSRD_HUMAN	SSR4	398.6	22	31.79
Voltage-dependent anion-selective channel protein 3	VDAC3_HUMAN	VDAC3	394.7	22	42.05
Cancer-related nucleoside-triphosphatase	Q5TDF0_HUMAN	NTPCR	393.8	22	44.3
HEAT repeat-containing protein 1	HEAT1_HUMAN	HEATR1	393.1	22	12.73
Succinate dehydrogenase [ubiquinone] iron-sulfur subunit, mitochondrial	SDHB_HUMAN	SDHB	390.9	22	32.5
Mannosyl-oligosaccharide 1,2-alpha-mannosidase IA	MA1A1_HUMAN	MAN1A1	387.9	22	21.9
DDRGK domain-containing protein 1	DDRGK_HUMAN	DDRGK1	387.7	22	57.64
Kinesin-1 heavy chain	KINH_HUMAN	KIF5B	375.8	22	14.75
Ras-related protein Rap-1A	RAP1A_HUMAN	RAP1A	375.8	22	42.39
Peptidyl-prolyl cis-trans isomerase B	PPIB_HUMAN	PPIB	369.1	22	31.94
WD repeat-containing protein 6	WDR6_HUMAN	WDR6	350.9	22	19
DNA polymerase subunit gamma-1	DPOG1_HUMAN	POLG	338.6	22	19.45
Myotubularin-related protein 6	MTMR6_HUMAN	MTMR6	335.9	22	18.04
Ceramide synthase 2	CERS2_HUMAN	CERS2	330.6	22	27.89
Vacuolar protein sorting-associated protein 13A	VP13A_HUMAN	VPS13A	330.3	22	7.18
UBX domain-containing protein 6	UBXN6_HUMAN	UBXN6	311.2	22	31.29
Propionyl-CoA carboxylase beta chain, mitochondrial	E7EX59_HUMAN	PCCB	291.6	22	37.54
GPI transamidase component PIG-T	PIGT_HUMAN	PIGT	274	22	19.03
Ankycorbin	RAI14_HUMAN	RAI14	266.6	22	20.04
Voltage-dependent L-type calcium channel subunit alpha-1C	CAC1C_HUMAN	CACNA1C	256.9	22	14.4
Prolow-density lipoprotein receptor-related protein 1	LRP1_HUMAN	LRP1	200.5	22	4.49
Ubiquilin-1	UBQL1_HUMAN	UBQLN1	500.6	21	19.35
Importin-9	IPO9_HUMAN	IPO9	479.2	21	17.68
TATA-binding protein-associated factor 2N	A0A075B7D9_HUMAN	TAF15	448.5	21	52.56
GrpE protein homolog 1, mitochondrial	GRPE1_HUMAN	GRPEL1	441.7	21	46.08
CD99 antigen	CD99_HUMAN	CD99	421.4	21	65.41
Multidrug resistance-associated protein 1	MRP1_HUMAN	ABCC1	412.9	21	18.36
Kinesin-like protein KIF20B	KI20B_HUMAN	KIF20B	404.1	21	7.9
HCLS1-associated protein X-1	HAX1_HUMAN	HAX1	403.1	21	49.46
Survival motor neuron protein	SMN_HUMAN	SMN1	398.5	21	37.75
Quinone oxidoreductase	QOR_HUMAN	CRYZ	394.6	21	45.29
Bcl-2-associated transcription factor 1	BCLF1_HUMAN	BCLAF1	391.5	21	9.69
Succinate-semialdehyde dehydrogenase, mitochondrial	SSDH_HUMAN	ALDH5A1	383.5	21	33.46
Trypsin-1	E7EQ64_HUMAN	PRSS1	383	21	31.42
UTP--glucose-1-phosphate uridylyltransferase	UGPA_HUMAN	UGP2	382.9	21	24.14
Vacuolar protein sorting-associated protein 33B	VP33B_HUMAN	VPS33B	379.3	21	23.82
Coiled-coil domain-containing protein 51	CCD51_HUMAN	CCDC51	378.5	21	35.52
AT-rich interactive domain-containing protein 3B	ARI3B_HUMAN	ARID3B	364.7	21	33.33
Developmentally-regulated GTP-binding protein 1	DRG1_HUMAN	DRG1	361.9	21	39.51
4-trimethylaminobutyraldehyde dehydrogenase	AL9A1_HUMAN	ALDH9A1	360.9	21	18.02
Transmembrane emp24 domain-containing protein 2	TMED2_HUMAN	TMED2	360.4	21	33.33
Cytochrome c oxidase subunit 6C	COX6C_HUMAN	COX6C	357.9	21	60
Electron transfer flavoprotein subunit beta	ETFB_HUMAN	ETFB	350.6	21	32.08
Tubulin beta-8 chain	TBB8_HUMAN	TUBB8	344.7	21	12.39
Golgi-specific brefeldin A-resistance guanine nucleotide exchange factor 1	GBF1_HUMAN	GBF1	338.4	21	19.69
Protein SCO1 homolog, mitochondrial	SCO1_HUMAN	SCO1	328	21	23.92
Mitochondrial Rho GTPase 2	MIRO2_HUMAN	RHOT2	324.4	21	22.33
Chromodomain-helicase-DNA-binding protein 4	CHD4_HUMAN	CHD4	321.9	21	10.98
Phosphatidylserine synthase 2	PTSS2_HUMAN	PTDSS2	320.9	21	12.11
Neuroblastoma-amplified sequence	NBAS_HUMAN	NBAS	318.7	21	13.37
Protein kinase C iota type	KPCI_HUMAN	PRKCI	316.6	21	18.12
Inositol 1,4,5-trisphosphate receptor type 2	ITPR2_HUMAN	ITPR2	316.3	21	9.37
Alpha-mannosidase 2	MA2A1_HUMAN	MAN2A1	309.7	21	14.6
Putative RNA-binding protein 15	RBM15_HUMAN	RBM15	308.3	21	16.07
Inositol 1,4,5-trisphosphate receptor type 1	ITPR1_HUMAN	ITPR1	296	21	9.28
Adenomatous polyposis coli protein	APC_HUMAN	APC	278.9	21	10.87
Complement C3	CO3_HUMAN	C3	277.6	21	11.73
Protein strawberry notch homolog 1	SBNO1_HUMAN	SBNO1	272.4	21	6.03
Centrosomal protein of 170 kDa	CE170_HUMAN	CEP170	257.4	21	11.74
CREB-regulated transcription coactivator 3	CRTC3_HUMAN	CRTC3	557.1	20	43.85
Granulins	GRN_HUMAN	GRN	516.3	20	19.73
Microsomal glutathione S-transferase 3	Q5VV89_HUMAN	MGST3	506.1	20	44.58
L-2-hydroxyglutarate dehydrogenase, mitochondrial	L2HDH_HUMAN	L2HGDH	494.7	20	22.68
Protein transport protein Sec61 subunit beta	SC61B_HUMAN	SEC61B	488	20	46.87
Serine/threonine-protein phosphatase PP1-gamma catalytic subunit	PP1G_HUMAN	PPP1CC	475.3	20	32.82
Dual specificity protein phosphatase CDC14A	CC14A_HUMAN	CDC14A	456.7	20	25.84
Ubiquitin-conjugating enzyme E2 N	UBE2N_HUMAN	UBE2N	444.3	20	44.08
L-lactate dehydrogenase A chain	LDHA_HUMAN	LDHA	437.5	20	30.12
Large neutral amino acids transporter small subunit 1	LAT1_HUMAN	SLC7A5	425.5	20	27.61
Ezrin	EZRI_HUMAN	EZR	425.3	20	22.35
Heat shock 70 kDa protein 12A	HS12A_HUMAN	HSPA12A	423.8	20	31.85
MAGUK p55 subfamily member 6	MPP6_HUMAN	MPP6	418.1	20	25.93
Heterogeneous nuclear ribonucleoprotein A3	ROA3_HUMAN	HNRNPA3	410.6	20	36.24
Mitochondrial-processing peptidase subunit beta	MPPB_HUMAN	PMPCB	408.4	20	23.11
Uncharacterized protein C17orf80	CQ080_HUMAN	C17orf80	405.2	20	25.12
Anoctamin-10	ANO10_HUMAN	ANO10	398.2	20	26.21
Abl interactor 2	E7EW77_HUMAN	ABI2	396.2	20	38.75
Peptidyl-prolyl cis-trans isomerase FKBP5	FKBP5_HUMAN	FKBP5	393.4	20	27.57
Malectin	MLEC_HUMAN	MLEC	388	20	34.93
Splicing factor 3B subunit 1	SF3B1_HUMAN	SF3B1	377.9	20	19.02
Ras-related protein Rab-14	RAB14_HUMAN	RAB14	374.8	20	51.16
DNA-directed RNA polymerase III subunit RPC4	RPC4_HUMAN	POLR3D	374.4	20	36.93
Partitioning defective 3 homolog	PARD3_HUMAN	PARD3	371.1	20	13.2
Ras-related protein Ral-A	RALA_HUMAN	RALA	370.7	20	50.97
Growth arrest and DNA damage-inducible proteins-interacting protein 1	G45IP_HUMAN	GADD45GIP1	362.4	20	54.95
Alpha-1,6-mannosyl-glycoprotein 2-beta-N-acetylglucosaminyltransferase	MGAT2_HUMAN	MGAT2	360.4	20	21.25
Methionine aminopeptidase 2	MAP2_HUMAN	METAP2	354.4	20	24.27
VARS2 protein	B7ZL25_HUMAN	VARS2	345.5	20	11.22
Eukaryotic translation initiation factor 5B	IF2P_HUMAN	EIF5B	343.4	20	17.05
NADH-cytochrome b5 reductase 1	NB5R1_HUMAN	CYB5R1	340.4	20	42.29
Mitochondrial inner membrane protein OXA1L	J3KNA0_HUMAN	OXA1L	340.2	20	20
Exportin-T	XPOT_HUMAN	XPOT	336.4	20	20.69
Bloom syndrome protein	BLM_HUMAN	BLM	335.6	20	15.1
Protein enabled homolog	ENAH_HUMAN	ENAH	329.6	20	43.82
DNA replication licensing factor MCM2	MCM2_HUMAN	MCM2	322.8	20	19.36
Disintegrin and metalloproteinase domain-containing protein 10	ADA10_HUMAN	ADAM10	316.3	20	12.43
116 kDa U5 small nuclear ribonucleoprotein component	U5S1_HUMAN	EFTUD2	316.1	20	21.21
Myosin phosphatase Rho-interacting protein (Fragment)	H0Y2S9_HUMAN	MPRIP	312.1	20	13.88
Uncharacterized protein	E9PAM4_HUMAN		312	20	24.5
Polypeptide N-acetylgalactosaminyltransferase 1	GALT1_HUMAN	GALNT1	310.9	20	21.29
Eukaryotic translation initiation factor 2 subunit 1	IF2A_HUMAN	EIF2S1	310.6	20	36.83
Cell cycle and apoptosis regulator protein 2	CCAR2_HUMAN	CCAR2	304.3	20	23.62
E3 ubiquitin-protein ligase TRAF7	TRAF7_HUMAN	TRAF7	300.5	20	29.1
E3 ubiquitin-protein ligase Midline-1	TRI18_HUMAN	MID1	299.5	20	19.79
Xaa-Pro dipeptidase	PEPD_HUMAN	PEPD	298.2	20	25.17
DNA topoisomerase 2-alpha	TOP2A_HUMAN	TOP2A	290.6	20	15.54
mRNA turnover protein 4 homolog	MRT4_HUMAN	MRTO4	455.3	19	30.96
14-3-3 protein zeta/delta	1433Z_HUMAN	YWHAZ	443.8	19	22.45
Ribose-phosphate pyrophosphokinase 1	PRPS1_HUMAN	PRPS1	436.3	19	31.13
ADP-ribosylation factor GTPase-activating protein 2	ARFG2_HUMAN	ARFGAP2	428.1	19	28.02
Gamma-tubulin complex component 2	GCP2_HUMAN	TUBGCP2	424.5	19	13.19
Serine beta-lactamase-like protein LACTB, mitochondrial	LACTB_HUMAN	LACTB	413.5	19	34
Procollagen-lysine,2-oxoglutarate 5-dioxygenase 3	PLOD3_HUMAN	PLOD3	407.2	19	15.04
Ras-related C3 botulinum toxin substrate 1	RAC1_HUMAN	RAC1	403.4	19	35.42
AP-3 complex subunit beta-1	AP3B1_HUMAN	AP3B1	399.3	19	13.53
Switch-associated protein 70	SWP70_HUMAN	SWAP70	399	19	21.71
Tubulin--tyrosine ligase-like protein 12	TTL12_HUMAN	TTLL12	394.8	19	26.09
NADH dehydrogenase [ubiquinone] 1 subunit C2	NDUC2_HUMAN	NDUFC2	394.1	19	53.78
Protein O-linked-mannose beta-1,4-N-acetylglucosaminyltransferase 2	PMGT2_HUMAN	POMGNT2	393.3	19	20.86
Surfeit locus protein 4	SURF4_HUMAN	SURF4	392.8	19	22.68
Ubiquitin-associated protein 2-like	UBP2L_HUMAN	UBAP2L	390.4	19	27.6
C2 calcium-dependent domain-containing protein 4C	C2C4C_HUMAN	C2CD4C	387.1	19	30.17
NADH dehydrogenase [ubiquinone] 1 alpha subcomplex subunit 6	NDUA6_HUMAN	NDUFA6	384.7	19	34.42
CTP synthase 2	PYRG2_HUMAN	CTPS2	379.3	19	15.02
Eukaryotic translation initiation factor 3 subunit F	EIF3F_HUMAN	EIF3F	377.8	19	31.37
Rho GTPase-activating protein 1	RHG01_HUMAN	ARHGAP1	374.6	19	25.28
Integrin-linked protein kinase	ILK_HUMAN	ILK	373.8	19	21.24
E3 ubiquitin-protein ligase TRIM4	TRIM4_HUMAN	TRIM4	369.3	19	20.4
Multifunctional protein ADE2	PUR6_HUMAN	PAICS	366.7	19	35.19
Sorting nexin-4	SNX4_HUMAN	SNX4	366	19	23.56
Golgi membrane protein 1	GOLM1_HUMAN	GOLM1	363.7	19	26.18
Prostaglandin E synthase 2	PGES2_HUMAN	PTGES2	363.1	19	39.52
Atlastin-2	ATLA2_HUMAN	ATL2	358.6	19	30.02
Acyl-CoA-binding domain-containing protein 5	ACBD5_HUMAN	ACBD5	358.2	19	23.97
Evolutionarily conserved signaling intermediate in Toll pathway, mitochondrial	ECSIT_HUMAN	ECSIT	356.4	19	43.39
Bifunctional 3'-phosphoadenosine 5'-phosphosulfate synthase 1	PAPS1_HUMAN	PAPSS1	355.5	19	19.71
Calmodulin	CALM_HUMAN	CALM1	353.6	19	51.68
Armadillo repeat-containing protein 8	ARMC8_HUMAN	ARMC8	350.5	19	28.38
Lysosome membrane protein 2	SCRB2_HUMAN	SCARB2	346.1	19	29.92
Membrane-associated progesterone receptor component 2	PGRC2_HUMAN	PGRMC2	340.3	19	36.32
Protein CASP	CASP_HUMAN	CUX1	338	19	22.19
Probable cysteine--tRNA ligase, mitochondrial	SYCM_HUMAN	CARS2	337	19	22.69
Flotillin-1	FLOT1_HUMAN	FLOT1	335	19	30.91
Protein DEK	DEK_HUMAN	DEK	332.9	19	30.4
FACT complex subunit SPT16	SP16H_HUMAN	SUPT16H	331.9	19	15.47
Neural cell adhesion molecule 1	NCAM1_HUMAN	NCAM1	326.2	19	12.12
Hemoglobin subunit alpha	HBA_HUMAN	HBA1	318.9	19	58.45
Transmembrane 9 superfamily member 2	TM9S2_HUMAN	TM9SF2	315.1	19	21.57
LIM domain only protein 7	LMO7_HUMAN	LMO7	314.4	19	10.52
Methylcrotonoyl-CoA carboxylase subunit alpha, mitochondrial	MCCA_HUMAN	MCCC1	313	19	26.21
SRSF protein kinase 1	Q5R363_HUMAN	SRPK1	311.4	19	19.85
Cingulin	CING_HUMAN	CGN	304.1	19	12.87
Succinyl-CoA ligase [ADP-forming] subunit beta, mitochondrial	SUCB1_HUMAN	SUCLA2	303.4	19	42.33
Early endosome antigen 1	EEA1_HUMAN	EEA1	296.2	19	9.78
BRCA1-associated protein	BRAP_HUMAN	BRAP	294.4	19	32.09
Plakophilin-4	A0A0D9SF60_HUMAN	PKP4	260.9	19	13
Translation factor GUF1, mitochondrial	GUF1_HUMAN	GUF1	256.8	19	24.66
Actin, alpha cardiac muscle 1	ACTC_HUMAN	ACTC1	248.8	19	15.65
Tudor and KH domain-containing protein	F6TB26_HUMAN	TDRKH	244.2	19	20.66
Occludin	OCLN_HUMAN	OCLN	241.9	19	18.59
HIG1 domain family member 1A, mitochondrial	HIG1A_HUMAN	HIGD1A	500.9	18	43.01
FAST kinase domain-containing protein 5	FAKD5_HUMAN	FASTKD5	492.1	18	18.59
Diablo homolog, mitochondrial	DBLOH_HUMAN	DIABLO	478.8	18	46.44
ATP-dependent RNA helicase DDX54	DDX54_HUMAN	DDX54	455.9	18	18.03
Calcium uptake protein 1, mitochondrial	MICU1_HUMAN	MICU1	442.6	18	27.73
Zinc transporter SLC39A7	S39A7_HUMAN	SLC39A7	429.4	18	14.07
FAD synthase	FAD1_HUMAN	FLAD1	423.8	18	26.06
Serine/threonine-protein kinase RIO2	RIOK2_HUMAN	RIOK2	420.2	18	34.96
Mitochondrial Rho GTPase 1	MIRO1_HUMAN	RHOT1	410.1	18	26.7
Contactin-1	CNTN1_HUMAN	CNTN1	405.9	18	14.44
Oxygen-dependent coproporphyrinogen-III oxidase, mitochondrial	HEM6_HUMAN	CPOX	400.9	18	23.79
Coiled-coil domain-containing protein 93	CCD93_HUMAN	CCDC93	398.6	18	29.64
ADP-ribosylation factor 4	ARF4_HUMAN	ARF4	392.2	18	34.44
Protein DENND6A	DEN6A_HUMAN	DENND6A	390.8	18	34.87
UV excision repair protein RAD23 homolog A	RD23A_HUMAN	RAD23A	389.2	18	28.93
Zinc transporter 9	ZNT9_HUMAN	SLC30A9	388.4	18	19.72
Kinetochore protein Nuf2	NUF2_HUMAN	NUF2	388.3	18	21.98
von Willebrand factor A domain-containing protein 8	VWA8_HUMAN	VWA8	387.8	18	13.23
Ras-related protein Rap-2c	RAP2C_HUMAN	RAP2C	387.7	18	59.56
Sorting nexin-6	SNX6_HUMAN	SNX6	382.8	18	22.17
Stromal membrane-associated protein 1	SMAP1_HUMAN	SMAP1	382	18	47.11
Endophilin-B2	B7ZC38_HUMAN	SH3GLB2	373.9	18	37.25
Conserved oligomeric Golgi complex subunit 8	COG8_HUMAN	COG8	372.3	18	18.95
Cytochrome c oxidase subunit NDUFA4	NDUA4_HUMAN	NDUFA4	370.8	18	62.96
Cytochrome c oxidase subunit 6A1, mitochondrial	CX6A1_HUMAN	COX6A1	370.5	18	64.22
Rhotekin-2	RTKN2_HUMAN	RTKN2	367.1	18	24.79
Phenylalanine--tRNA ligase alpha subunit	SYFA_HUMAN	FARSA	366.4	18	30.12
Atlastin-3	ATLA3_HUMAN	ATL3	357.7	18	20.33
Replication factor C subunit 1	RFC1_HUMAN	RFC1	357.6	18	9.58
Cyclin-dependent-like kinase 5	CDK5_HUMAN	CDK5	355.7	18	32.88
Enhancer of mRNA-decapping protein 4	EDC4_HUMAN	EDC4	355.5	18	19.13
Anaphase-promoting complex subunit 7	APC7_HUMAN	ANAPC7	353	18	21.2
DNA primase large subunit	PRI2_HUMAN	PRIM2	350.1	18	20.63
U1 small nuclear ribonucleoprotein 70 kDa	RU17_HUMAN	SNRNP70	346.6	18	23.11
Mitochondrial import inner membrane translocase subunit TIM14	TIM14_HUMAN	DNAJC19	333.9	18	70.69
Transcription factor 25	TCF25_HUMAN	TCF25	330.4	18	27.96
Enoyl-CoA delta isomerase 1, mitochondrial	ECI1_HUMAN	ECI1	328.7	18	50.88
[Pyruvate dehydrogenase (acetyl-transferring)] kinase isozyme 3, mitochondrial	PDK3_HUMAN	PDK3	328.2	18	32.27
Growth factor receptor-bound protein 10	GRB10_HUMAN	GRB10	325.1	18	16.67
Mitochondrial antiviral-signaling protein	MAVS_HUMAN	MAVS	322.6	18	30.93
Heterogeneous nuclear ribonucleoprotein D0	HNRPD_HUMAN	HNRNPD	321.1	18	23.38
Leucine-rich repeat and WD repeat-containing protein 1	LRWD1_HUMAN	LRWD1	315.8	18	25.5
26S proteasome non-ATPase regulatory subunit 2	PSMD2_HUMAN	PSMD2	311	18	13.99
Cyclin-dependent kinase 18	CDK18_HUMAN	CDK18	306.8	18	22.42
2-oxoisovalerate dehydrogenase subunit alpha, mitochondrial	ODBA_HUMAN	BCKDHA	303.5	18	29.21
DnaJ homolog subfamily C member 1	DNJC1_HUMAN	DNAJC1	297.3	18	20.04
Heterogeneous nuclear ribonucleoprotein D-like	HNRDL_HUMAN	HNRNPDL	293.2	18	25.48
Myosin light chain kinase, smooth muscle	MYLK_HUMAN	MYLK	275.6	18	9.87
Phosphatidylinositol 4-phosphate 3-kinase C2 domain-containing subunit alpha	P3C2A_HUMAN	PIK3C2A	266.5	18	9.19
Nucleolar protein 56	NOP56_HUMAN	NOP56	259.6	18	17.51
Ras-related protein Rab-21	RAB21_HUMAN	RAB21	569.6	17	22.67
Apolipoprotein A-II	APOA2_HUMAN	APOA2	540.9	17	21
Aminoacyl tRNA synthase complex-interacting multifunctional protein 1	AIMP1_HUMAN	AIMP1	513.2	17	26.79
Eukaryotic translation elongation factor 1 epsilon-1	MCA3_HUMAN	EEF1E1	506	17	43.68
Transmembrane protein 263	TM263_HUMAN	TMEM263	505.3	17	87.07
Translocon-associated protein subunit gamma	SSRG_HUMAN	SSR3	500.8	17	32.97
3-beta-hydroxysteroid-Delta(8),Delta(7)-isomerase	EBP_HUMAN	EBP	485.2	17	33.48
Isovaleryl-CoA dehydrogenase, mitochondrial	IVD_HUMAN	IVD	478.7	17	30.02
Ribonucleoprotein PTB-binding 2	RAVR2_HUMAN	RAVER2	478.2	17	23.88
Ras-related protein R-Ras2	RRAS2_HUMAN	RRAS2	472.5	17	36.27
Guanine nucleotide-binding protein G(I)/G(S)/G(T) subunit beta-1	GBB1_HUMAN	GNB1	455.2	17	39.41
Probable ATP-dependent RNA helicase DDX47	DDX47_HUMAN	DDX47	452.7	17	31.65
NADH-ubiquinone oxidoreductase chain 4	NU4M_HUMAN	MT-ND4	451.2	17	26.8
FGFR1 oncogene partner	A0A087WV25_HUMAN	FGFR1OP	450.1	17	31.62
Protein transport protein Sec23B	SC23B_HUMAN	SEC23B	446.4	17	26.86
RNA-binding motif protein, X chromosome	RBMX_HUMAN	RBMX	438	17	26.85
Syntaxin-binding protein 1	STXB1_HUMAN	STXBP1	432.2	17	19.9
26S proteasome non-ATPase regulatory subunit 4	PSMD4_HUMAN	PSMD4	429	17	36.34
Carnitine O-acetyltransferase	CACP_HUMAN	CRAT	427.1	17	17.73
Protein LTV1 homolog	LTV1_HUMAN	LTV1	424.7	17	17.05
Ubiquilin-4	UBQL4_HUMAN	UBQLN4	417.2	17	41.6
Putative GTP-binding protein 6	GTPB6_HUMAN	GTPBP6	415.5	17	27.52
Malonyl-CoA-acyl carrier protein transacylase, mitochondrial	FABD_HUMAN	MCAT	410.2	17	31.54
BRCA1-associated ATM activator 1	BRAT1_HUMAN	BRAT1	408.1	17	21.44
tRNA (guanine(26)-N(2))-dimethyltransferase	TRM1_HUMAN	TRMT1	407.1	17	17.6
Large subunit GTPase 1 homolog	LSG1_HUMAN	LSG1	405.5	17	18.54
HAUS augmin-like complex subunit 3	HAUS3_HUMAN	HAUS3	404.3	17	26.2
Nucleoside diphosphate kinase	Q4TT34_HUMAN	NME4	402.3	17	63.59
Cell adhesion molecule 1	CADM1_HUMAN	CADM1	401.4	17	22.72
NADH dehydrogenase [ubiquinone] 1 beta subcomplex subunit 9	NDUB9_HUMAN	NDUFB9	395.7	17	36.87
Eukaryotic translation initiation factor 5	IF5_HUMAN	EIF5	389.5	17	35.5
Mitochondrial dynamics protein MID51	B0QY95_HUMAN	MIEF1	381.8	17	21.55
Methionine--tRNA ligase, mitochondrial	SYMM_HUMAN	MARS2	378.5	17	23.61
Inner nuclear membrane protein Man1	MAN1_HUMAN	LEMD3	373.7	17	18.99
Cytosolic non-specific dipeptidase	CNDP2_HUMAN	CNDP2	372.3	17	33.89
mRNA-decapping enzyme 1A	DCP1A_HUMAN	DCP1A	372.3	17	37.29
Intraflagellar transport protein 74 homolog	IFT74_HUMAN	IFT74	364.5	17	20.67
Regulator of microtubule dynamics protein 3	RMD3_HUMAN	RMDN3	361.4	17	26.6
Dephospho-CoA kinase domain-containing protein	DCAKD_HUMAN	DCAKD	360.1	17	26.84
Synapsin-2	A0A087WW96_HUMAN	SYN2	347.7	17	28.69
Peptide-N(4)-(N-acetyl-beta-glucosaminyl)asparagine amidase (Fragment)	A0A0C4DFP4_HUMAN	NGLY1	346.5	17	26.86
Centrosomal protein of 57 kDa	CEP57_HUMAN	CEP57	345	17	18.6
Transmembrane protein 65	TMM65_HUMAN	TMEM65	342.5	17	50.83
Integrin alpha-V	ITAV_HUMAN	ITGAV	340.3	17	16.6
Heat shock 70 kDa protein 14	HSP7E_HUMAN	HSPA14	339.5	17	21.41
Hsc70-interacting protein	F10A1_HUMAN	ST13	339.2	17	30.35
Histone H2A.Z	H2AZ_HUMAN	H2AFZ	336.8	17	49.22
Aspartate aminotransferase, mitochondrial	AATM_HUMAN	GOT2	331.1	17	30.23
Solute carrier family 12 member 2	S12A2_HUMAN	SLC12A2	330.5	17	19.31
Actin-related protein 2	ARP2_HUMAN	ACTR2	328.8	17	28.43
Epsin-2	I3L2B2_HUMAN	EPN2	325.2	17	41.59
5'-3' exoribonuclease 2	XRN2_HUMAN	XRN2	323.9	17	17.68
Sister chromatid cohesion protein PDS5 homolog A	PDS5A_HUMAN	PDS5A	323.9	17	11.97
Serine palmitoyltransferase 2	SPTC2_HUMAN	SPTLC2	323.3	17	18.86
PERQ amino acid-rich with GYF domain-containing protein 2	PERQ2_HUMAN	GIGYF2	323.1	17	21.31
Selenocysteine-specific elongation factor	SELB_HUMAN	EEFSEC	320.4	17	17.45
Melanoma-associated antigen D2	Q5H909_HUMAN	MAGED2	314.6	17	28.06
Ribosomal protein S6 kinase alpha-3	KS6A3_HUMAN	RPS6KA3	311.5	17	13.65
Cell cycle control protein 50A	CC50A_HUMAN	TMEM30A	311.2	17	21.33
Thyroid receptor-interacting protein 6	TRIP6_HUMAN	TRIP6	309.8	17	22.69
Long-chain-fatty-acid--CoA ligase 4	ACSL4_HUMAN	ACSL4	307	17	17.86
3-hydroxyisobutyrate dehydrogenase, mitochondrial	3HIDH_HUMAN	HIBADH	302	17	26.49
DNA replication licensing factor MCM3	MCM3_HUMAN	MCM3	297.8	17	17.08
Eukaryotic translation initiation factor 3 subunit I	EIF3I_HUMAN	EIF3I	296	17	41.54
cAMP-dependent protein kinase catalytic subunit alpha	KAPCA_HUMAN	PRKACA	293.8	17	30.48
G2/mitotic-specific cyclin-B1	CCNB1_HUMAN	CCNB1	291.2	17	32.56
Neurabin-2	NEB2_HUMAN	PPP1R9B	287.9	17	20.37
Origin recognition complex subunit 2	ORC2_HUMAN	ORC2	276.5	17	18.37
Nck-associated protein 1	NCKP1_HUMAN	NCKAP1	263.1	17	18.78
Ubiquitin carboxyl-terminal hydrolase 19	UBP19_HUMAN	USP19	218.2	17	15.82
Microtubule-associated protein RP/EB family member 2	MARE2_HUMAN	MAPRE2	572.8	16	33.03
Cytochrome c oxidase subunit 3	COX3_HUMAN	MT-CO3	530.9	16	14.18
Serine/arginine-rich splicing factor 2	SRSF2_HUMAN	SRSF2	526.3	16	28.51
Nucleolar and coiled-body phosphoprotein 1	NOLC1_HUMAN	NOLC1	523.7	16	17.02
Nitric oxide-associated protein 1	NOA1_HUMAN	NOA1	486.5	16	20.92
Adenylate kinase 4, mitochondrial	KAD4_HUMAN	AK4	462	16	48.43
S-adenosylmethionine synthase isoform type-2	METK2_HUMAN	MAT2A	457.7	16	29.11
Ras-related protein Rab-5A	RAB5A_HUMAN	RAB5A	454.6	16	34.88
Acyl-CoA dehydrogenase family member 11	ACD11_HUMAN	ACAD11	448.8	16	22.18
Proline-rich protein PRCC	PRCC_HUMAN	PRCC	448.6	16	17.52
Nucleoporin p58/p45	NUP58_HUMAN	NUP58	445.5	16	9.68
RNA polymerase II-associated protein 3	RPAP3_HUMAN	RPAP3	443	16	24.96
Peptidyl-prolyl cis-trans isomerase F, mitochondrial	PPIF_HUMAN	PPIF	439.1	16	31.88
pre-rRNA processing protein FTSJ3	SPB1_HUMAN	FTSJ3	430.9	16	16.53
Serine/threonine-protein phosphatase 2B catalytic subunit alpha isoform	PP2BA_HUMAN	PPP3CA	429.9	16	16.51
Mitochondrial carrier homolog 1	MTCH1_HUMAN	MTCH1	427.9	16	45.16
Cysteine desulfurase, mitochondrial	NFS1_HUMAN	NFS1	420.8	16	38.07
Transmembrane protein 33	TMM33_HUMAN	TMEM33	417.6	16	21.05
Pachytene checkpoint protein 2 homolog	PCH2_HUMAN	TRIP13	415.5	16	25
Transmembrane protein 165	TM165_HUMAN	TMEM165	413.8	16	29.63
Protein SCO2 homolog, mitochondrial	SCO2_HUMAN	SCO2	412.5	16	40.23
Translocon-associated protein subunit alpha	SSRA_HUMAN	SSR1	404.9	16	55.94
U4/U6 small nuclear ribonucleoprotein Prp31	PRP31_HUMAN	PRPF31	401.2	16	26.45
UPF0568 protein C14orf166	CN166_HUMAN	C14orf166	399.2	16	36.07
Sulfhydryl oxidase 2	QSOX2_HUMAN	QSOX2	393.9	16	17.19
Vacuolar fusion protein CCZ1 homolog B	CCZ1B_HUMAN	CCZ1B	391.8	16	24.9
Tubulin beta-3 chain	TBB3_HUMAN	TUBB3	379.2	16	18.89
Succinyl-CoA ligase [GDP-forming] subunit beta, mitochondrial	SUCB2_HUMAN	SUCLG2	378.5	16	26.39
Probable serine carboxypeptidase CPVL	CPVL_HUMAN	CPVL	378.4	16	27.94
Methyltransferase-like protein 16	MET16_HUMAN	METTL16	377.3	16	25.44
Wiskott-Aldrich syndrome protein family member 1	WASF1_HUMAN	WASF1	376.9	16	29.16
Transmembrane protein 70, mitochondrial	TMM70_HUMAN	TMEM70	375.7	16	28.46
Nucleoporin NUP188 homolog	NU188_HUMAN	NUP188	365.4	16	14.35
General transcription factor II-I	GTF2I_HUMAN	GTF2I	365.2	16	16.03
Inactive hydroxysteroid dehydrogenase-like protein 1	HSDL1_HUMAN	HSDL1	364.4	16	36.67
Spartin	SPG20_HUMAN	SPG20	362.4	16	25.68
5'-nucleotidase domain-containing protein 3	NT5D3_HUMAN	NT5DC3	361.5	16	21.35
Vitronectin	VTNC_HUMAN	VTN	358.2	16	11.09
Lipolysis-stimulated lipoprotein receptor	LSR_HUMAN	LSR	348.1	16	30.35
Phosphoacetylglucosamine mutase	AGM1_HUMAN	PGM3	348	16	21.59
FERM, RhoGEF and pleckstrin domain-containing protein 1	FARP1_HUMAN	FARP1	347.9	16	10.32
PRKCA-binding protein	PICK1_HUMAN	PICK1	341.8	16	20.05
Chitinase domain-containing protein 1	CHID1_HUMAN	CHID1	340.9	16	34.1
Thymidylate kinase	KTHY_HUMAN	DTYMK	340.5	16	47.64
Protein KHNYN	KHNYN_HUMAN	KHNYN	340	16	22.86
Kinesin-like protein KIF2A	KIF2A_HUMAN	KIF2A	337	16	17.74
Arf-GAP with SH3 domain, ANK repeat and PH domain-containing protein 2	ASAP2_HUMAN	ASAP2	335.6	16	14.21
Ankyrin repeat domain-containing protein SOWAHC	SWAHC_HUMAN	SOWAHC	332.1	16	16.95
Glucose 1,6-bisphosphate synthase	PGM2L_HUMAN	PGM2L1	329.8	16	21.38
Dihydroxyacetone phosphate acyltransferase	GNPAT_HUMAN	GNPAT	329.4	16	24.56
Lupus La protein	LA_HUMAN	SSB	328.3	16	22.3
Kinesin-like protein KIF23	KIF23_HUMAN	KIF23	327.2	16	16.56
ATP synthase-coupling factor 6, mitochondrial	ATP5J_HUMAN	ATP5J	318.1	16	46.3
Required for meiotic nuclear division protein 1 homolog	RMND1_HUMAN	RMND1	317.3	16	27.84
Golgi apparatus protein 1	GSLG1_HUMAN	GLG1	313.8	16	15.27
DnaJ homolog subfamily B member 11	DJB11_HUMAN	DNAJB11	310.6	16	28.77
NADH dehydrogenase [ubiquinone] 1 beta subcomplex subunit 6	NDUB6_HUMAN	NDUFB6	306.9	16	53.12
Protein FAM65B	FA65B_HUMAN	FAM65B	306.4	16	17.42
NADH dehydrogenase [ubiquinone] 1 beta subcomplex subunit 8, mitochondrial	NDUB8_HUMAN	NDUFB8	302.3	16	36.02
GPI transamidase component PIG-S	PIGS_HUMAN	PIGS	299.3	16	18.74
DNA repair protein XRCC4	XRCC4_HUMAN	XRCC4	295.4	16	28.87
Probable ATP-dependent RNA helicase DDX49	DDX49_HUMAN	DDX49	292.6	16	30.85
Insulin-like growth factor 1 receptor	IGF1R_HUMAN	IGF1R	284.1	16	12.66
Cold shock domain-containing protein E1	CSDE1_HUMAN	CSDE1	282.9	16	16.11
Thyroid hormone receptor-associated protein 3	TR150_HUMAN	THRAP3	280.7	16	20.84
Spermatogenesis-associated protein 5	SPAT5_HUMAN	SPATA5	279.9	16	12.32
Polypeptide N-acetylgalactosaminyltransferase 12	GLT12_HUMAN	GALNT12	275.6	16	16.52
Rab11 family-interacting protein 2	RFIP2_HUMAN	RAB11FIP2	275.5	16	25.78
DNA ligase 3	DNLI3_HUMAN	LIG3	271.8	16	10.01
3-hydroxyisobutyryl-CoA hydrolase, mitochondrial	HIBCH_HUMAN	HIBCH	519.4	15	27.72
Apoptosis regulator BAX	BAX_HUMAN	BAX	518	15	36.24
Cytochrome b5 type B	J3KNF8_HUMAN	CYB5B	513.7	15	59.33
Protoporphyrinogen oxidase	PPOX_HUMAN	PPOX	481.5	15	44.03
Vesicle-associated membrane protein 3	VAMP3_HUMAN	VAMP3	465.2	15	55
Sideroflexin-4	SFXN4_HUMAN	SFXN4	464	15	26.41
BAG family molecular chaperone regulator 3	BAG3_HUMAN	BAG3	460.9	15	24.17
UPF0469 protein KIAA0907	K0907_HUMAN	KIAA0907	457.2	15	42.35
14-3-3 protein beta/alpha	1433B_HUMAN	YWHAB	450.4	15	36.99
Mannosyl-oligosaccharide 1,2-alpha-mannosidase IB	MA1A2_HUMAN	MAN1A2	446.5	15	14.82
Na(+)/H(+) exchange regulatory cofactor NHE-RF1	NHRF1_HUMAN	SLC9A3R1	443.9	15	33.8
Regulatory-associated protein of mTOR	RPTOR_HUMAN	RPTOR	441.8	15	16.1
Nucleolar complex protein 3 homolog	NOC3L_HUMAN	NOC3L	440.8	15	17.75
LIM domain-containing protein 1	C9JRJ5_HUMAN	LIMD1	440.1	15	33.23
Ubiquitin-like modifier-activating enzyme 5	UBA5_HUMAN	UBA5	437.7	15	18.32
L-xylulose reductase (Fragment)	J3KS22_HUMAN	DCXR	435.5	15	44.64
Heterochromatin protein 1-binding protein 3	HP1B3_HUMAN	HP1BP3	435.4	15	18.08
Excitatory amino acid transporter 1	EAA1_HUMAN	SLC1A3	434.1	15	21.13
Heme oxygenase 2	HMOX2_HUMAN	HMOX2	427	15	40.19
Programmed cell death protein 6	PDCD6_HUMAN	PDCD6	420.8	15	48.17
MICOS complex subunit	F8WAR4_HUMAN	CHCHD3	420.1	15	39
Phosphatidylinositol 4-kinase alpha	PI4KA_HUMAN	PI4KA	415.6	15	8.42
Transcription factor Sp9	SP9_HUMAN	SP9	407.2	15	40.29
Cell division cycle protein 20 homolog	CDC20_HUMAN	CDC20	403.5	15	24.65
Complex I intermediate-associated protein 30, mitochondrial	CIA30_HUMAN	NDUFAF1	400.2	15	31.8
Nuclear pore complex protein Nup85	J3KT10_HUMAN	NUP85	400	15	28.31
NADH dehydrogenase [ubiquinone] iron-sulfur protein 8, mitochondrial	NDUS8_HUMAN	NDUFS8	391.9	15	35.71
COP9 signalosome complex subunit 1	CSN1_HUMAN	GPS1	391.6	15	12.22
MICOS complex subunit MIC26	MIC26_HUMAN	APOO	391.5	15	57.07
Heat shock protein beta-1	HSPB1_HUMAN	HSPB1	390.5	15	39.51
Engulfment and cell motility protein 2	ELMO2_HUMAN	ELMO2	389.1	15	18.06
Mitochondrial import inner membrane translocase subunit Tim17-B	TI17B_HUMAN	TIMM17B	387.3	15	54.07
Enoyl-CoA delta isomerase 2, mitochondrial	ECI2_HUMAN	ECI2	385.5	15	21.57
Isocitrate dehydrogenase [NAD] subunit gamma, mitochondrial	IDH3G_HUMAN	IDH3G	385.4	15	28.75
Protein NipSnap homolog 3A	NPS3A_HUMAN	NIPSNAP3A	384.4	15	43.72
Protein diaphanous homolog 2	DIAP2_HUMAN	DIAPH2	383.6	15	19.23
Torsin-1A-interacting protein 2	TOIP2_HUMAN	TOR1AIP2	382.7	15	18.3
Metal transporter CNNM3	CNNM3_HUMAN	CNNM3	378.9	15	23.76
Delta(24)-sterol reductase	DHC24_HUMAN	DHCR24	373.3	15	26.36
BRISC complex subunit Abro1	F175B_HUMAN	FAM175B	373.1	15	32.29
Receptor-interacting serine/threonine-protein kinase 1	RIPK1_HUMAN	RIPK1	371.1	15	23.7
Ribosomal L1 domain-containing protein 1	RL1D1_HUMAN	RSL1D1	366.9	15	24.9
Torsin-1A-interacting protein 1	TOIP1_HUMAN	TOR1AIP1	364	15	27.4
DNA primase small subunit	PRI1_HUMAN	PRIM1	363.7	15	25.48
Prolyl 3-hydroxylase 1	P3H1_HUMAN	P3H1	363	15	22.01
Cytochrome c oxidase subunit 7A2, mitochondrial	CX7A2_HUMAN	COX7A2	361.9	15	56.63
ATP-dependent RNA helicase DDX50	DDX50_HUMAN	DDX50	358.9	15	8.41
Neutral cholesterol ester hydrolase 1	NCEH1_HUMAN	NCEH1	356.6	15	13.97
MICOS complex subunit	J3QTA6_HUMAN	CHCHD6	355.8	15	33.2
Calcium uniporter protein, mitochondrial	MCU_HUMAN	MCU	347.5	15	22.79
Long-chain-fatty-acid--CoA ligase 1	ACSL1_HUMAN	ACSL1	344.2	15	17.77
GTP-binding protein 2	GTPB2_HUMAN	GTPBP2	343.6	15	19.27
Cell division cycle protein 16 homolog	CDC16_HUMAN	CDC16	342.5	15	17.9
Glucocorticoid-induced transcript 1 protein	GLCI1_HUMAN	GLCCI1	341.6	15	20.11
Nuclear pore complex protein Nup155	NU155_HUMAN	NUP155	341.2	15	18.62
Septin-10	SEP10_HUMAN	SEPT10	340.5	15	17.3
Asparagine--tRNA ligase, cytoplasmic	SYNC_HUMAN	NARS	340.4	15	22.45
26S protease regulatory subunit 7	PRS7_HUMAN	PSMC2	337.5	15	23.33
MAGUK p55 subfamily member 7	MPP7_HUMAN	MPP7	337.4	15	16.15
TAF6-like RNA polymerase II p300/CBP-associated factor-associated factor 65 kDa subunit 6L	TAF6L_HUMAN	TAF6L	335.3	15	28.46
Pantothenate kinase 4	PANK4_HUMAN	PANK4	335	15	15.91
Cyclin-dependent kinase 16	CDK16_HUMAN	CDK16	332.5	15	17.94
TATA-binding protein-associated factor 172	BTAF1_HUMAN	BTAF1	329.5	15	15.2
Zinc finger protein 598	ZN598_HUMAN	ZNF598	328.8	15	14.96
SURP and G-patch domain-containing protein 2	SUGP2_HUMAN	SUGP2	323.1	15	10.44
Clathrin light chain A	CLCA_HUMAN	CLTA	316.2	15	28.44
Sphingosine-1-phosphate lyase 1	SGPL1_HUMAN	SGPL1	315.6	15	22.71
Cadherin-2	CADH2_HUMAN	CDH2	315.2	15	16.78
Microtubule-associated protein 1B	MAP1B_HUMAN	MAP1B	313.3	15	5.55
Protein MTO1 homolog, mitochondrial	MTO1_HUMAN	MTO1	312.5	15	26.78
Myosin regulatory light chain 12B	ML12B_HUMAN	MYL12B	308.4	15	55.81
Ferrochelatase, mitochondrial	HEMH_HUMAN	FECH	306.6	15	30.73
Serine/threonine-protein kinase VRK2	VRK2_HUMAN	VRK2	306.4	15	32.48
SH3KBP1-binding protein 1	SHKB1_HUMAN	SHKBP1	305.2	15	35.22
Endoplasmic reticulum-Golgi intermediate compartment protein 3	ERGI3_HUMAN	ERGIC3	301.2	15	20.37
Actin-binding LIM protein 1	ABLM1_HUMAN	ABLIM1	301	15	11.36
Nuclear pore complex protein Nup153	NU153_HUMAN	NUP153	291.9	15	9.96
Formin-like protein 2	FMNL2_HUMAN	FMNL2	290.4	15	21.45
Triosephosphate isomerase	TPIS_HUMAN	TPI1	289.2	15	27.62
Serine/threonine-protein kinase N2	PKN2_HUMAN	PKN2	287.2	15	18.9
A-kinase anchor protein 12	AKA12_HUMAN	AKAP12	285.3	15	11.22
Beta-catenin-like protein 1	CTBL1_HUMAN	CTNNBL1	284	15	23.45
U2 snRNP-associated SURP motif-containing protein	SR140_HUMAN	U2SURP	282.2	15	12.55
Ras association domain-containing protein 8	RASF8_HUMAN	RASSF8	264.5	15	28.64
Pyridoxal-dependent decarboxylase domain-containing protein 1	H3BND4_HUMAN	PDXDC1	260.7	15	20.35
Tetratricopeptide repeat protein 12	TTC12_HUMAN	TTC12	259.6	15	23.09
Sterile alpha motif domain-containing protein 11	SAM11_HUMAN	SAMD11	253.3	15	22.03
ADP-ribosylation factor-like protein 1	ARL1_HUMAN	ARL1	489.7	14	34.81
Pescadillo homolog	PESC_HUMAN	PES1	449.7	14	18.88
Calpain-1 catalytic subunit	CAN1_HUMAN	CAPN1	430.6	14	14.57
Amyloid-like protein 2	APLP2_HUMAN	APLP2	427.2	14	23.97
Multiple myeloma tumor-associated protein 2	MMTA2_HUMAN	MMTAG2	424.8	14	25.48
Hermansky-Pudlak syndrome 6 protein	HPS6_HUMAN	HPS6	423	14	33.94
Protein LOC102724023	A0A0B4J2D5_HUMAN	LOC102724023	422.4	14	50
MAGUK p55 subfamily member 5	MPP5_HUMAN	MPP5	418.8	14	18.07
NADH dehydrogenase [ubiquinone] 1 beta subcomplex subunit 4	NDUB4_HUMAN	NDUFB4	417.6	14	35.66
Calcium-transporting ATPase type 2C member 1	AT2C1_HUMAN	ATP2C1	417.5	14	16.87
ATP synthase mitochondrial F1 complex assembly factor 1	ATPF1_HUMAN	ATPAF1	414.7	14	34.45
Protein FAM83D	FA83D_HUMAN	FAM83D	410.3	14	22.39
Mothers against decapentaplegic homolog 5	SMAD5_HUMAN	SMAD5	409.6	14	25.38
Inorganic pyrophosphatase 2, mitochondrial	IPYR2_HUMAN	PPA2	405.9	14	26.95
tRNA (uracil-5-)-methyltransferase homolog A	F2Z2W7_HUMAN	TRMT2A	405.9	14	18.2
Nuclear ubiquitous casein and cyclin-dependent kinase substrate 1	NUCKS_HUMAN	NUCKS1	402	14	5.35
Serine/arginine-rich splicing factor 1	SRSF1_HUMAN	SRSF1	401.3	14	43.95
Heterogeneous nuclear ribonucleoprotein A/B	A0A087WZV1_HUMAN	HNRNPAB	399.7	14	28.79
tRNA modification GTPase GTPBP3, mitochondrial	GTPB3_HUMAN	GTPBP3	398.7	14	18.7
Inactive serine/threonine-protein kinase VRK3	VRK3_HUMAN	VRK3	398.6	14	19.62
Eukaryotic translation initiation factor 3 subunit M	EIF3M_HUMAN	EIF3M	393.9	14	43.05
GTP-binding protein 10	GTPBA_HUMAN	GTPBP10	392	14	26.1
Rab3 GTPase-activating protein non-catalytic subunit	RBGPR_HUMAN	RAB3GAP2	391.1	14	13.64
MICOS complex subunit MIC13	MIC13_HUMAN	MIC13	384.4	14	54.24
Splicing factor 45	SPF45_HUMAN	RBM17	384.1	14	22.69
U4/U6.U5 tri-snRNP-associated protein 2	SNUT2_HUMAN	USP39	382.2	14	18.94
Alpha-soluble NSF attachment protein	SNAA_HUMAN	NAPA	378.9	14	41.36
Heterogeneous nuclear ribonucleoprotein M (Fragment)	M0QZM1_HUMAN	HNRNPM	376.6	14	6.01
Histone deacetylase 1	HDAC1_HUMAN	HDAC1	373.4	14	15.77
NADH dehydrogenase [ubiquinone] 1 beta subcomplex subunit 3	NDUB3_HUMAN	NDUFB3	372	14	43.88
Septin-8	SEPT8_HUMAN	SEPT8	370.6	14	20.7
Ribosome-releasing factor 2, mitochondrial	RRF2M_HUMAN	GFM2	369.6	14	20.54
Forkhead box protein P1	FOXP1_HUMAN	FOXP1	368.5	14	34.27
Fragile X mental retardation syndrome-related protein 2	FXR2_HUMAN	FXR2	365.8	14	18.87
Prolactin regulatory element-binding protein	PREB_HUMAN	PREB	362	14	27.34
Fidgetin-like protein 1	FIGL1_HUMAN	FIGNL1	361.4	14	18.25
Serine/arginine-rich splicing factor 3	SRSF3_HUMAN	SRSF3	360.8	14	38.41
cAMP-dependent protein kinase type II-beta regulatory subunit	KAP3_HUMAN	PRKAR2B	359.7	14	38.76
Eukaryotic peptide chain release factor GTP-binding subunit ERF3A	ERF3A_HUMAN	GSPT1	358.1	14	9.28
G-protein-signaling modulator 1	A0A0A0MSK4_HUMAN	GPSM1	356.9	14	23.41
OCIA domain-containing protein 1	OCAD1_HUMAN	OCIAD1	355.3	14	43.67
Cytochrome c oxidase assembly factor 3 homolog, mitochondrial	COA3_HUMAN	COA3	350.2	14	40.57
Nucleolar complex protein 2 homolog	NOC2L_HUMAN	NOC2L	347.9	14	17.36
HLA class I histocompatibility antigen, A-3 alpha chain	1A03_HUMAN	HLA-A	347.7	14	28.49
LisH domain-containing protein ARMC9	ARMC9_HUMAN	ARMC9	343.7	14	14.57
Cytochrome b-c1 complex subunit 8	QCR8_HUMAN	UQCRQ	342.4	14	45.12
CUGBP Elav-like family member 1	CELF1_HUMAN	CELF1	341.1	14	17.9
Endoplasmic reticulum resident protein 29	ERP29_HUMAN	ERP29	338.2	14	26.82
Signal transducing adapter molecule 1	STAM1_HUMAN	STAM	338	14	20.37
Probable asparagine--tRNA ligase, mitochondrial	SYNM_HUMAN	NARS2	337.3	14	22.85
Abl interactor 1	ABI1_HUMAN	ABI1	336.6	14	40.55
General transcription factor 3C polypeptide 5	TF3C5_HUMAN	GTF3C5	335.7	14	33.33
Prostaglandin F2 receptor negative regulator	FPRP_HUMAN	PTGFRN	334.5	14	16.38
Probable ATP-dependent RNA helicase DDX27	DDX27_HUMAN	DDX27	334	14	15.45
AP-2 complex subunit alpha-1	AP2A1_HUMAN	AP2A1	333.8	14	16.86
Dimethyladenosine transferase 2, mitochondrial	TFB2M_HUMAN	TFB2M	333.2	14	18.43
UPF0668 protein C10orf76	CJ076_HUMAN	C10orf76	326.9	14	16.84
cGMP-dependent protein kinase 1	KGP1_HUMAN	PRKG1	326.1	14	14.75
Lipoma-preferred partner	LPP_HUMAN	LPP	326.1	14	23.37
Crooked neck-like protein 1	CRNL1_HUMAN	CRNKL1	325.9	14	11.79
Mitochondrial ribonuclease P protein 3	MRRP3_HUMAN	KIAA0391	324.9	14	11.66
AP-1 complex subunit beta-1	AP1B1_HUMAN	AP1B1	321.5	14	17.09
Mitochondrial import receptor subunit TOM6 homolog	TOM6_HUMAN	TOMM6	318.4	14	72.97
Peptidyl-prolyl cis-trans isomerase A	PPIA_HUMAN	PPIA	312.8	14	49.09
Tight junction protein ZO-2	ZO2_HUMAN	TJP2	312.4	14	8.68
Vacuolar protein sorting-associated protein 35	VPS35_HUMAN	VPS35	295.2	14	14.95
Vacuolar protein sorting-associated protein 4B	VPS4B_HUMAN	VPS4B	295.2	14	25.68
DnaJ homolog subfamily C member 3	DNJC3_HUMAN	DNAJC3	287.6	14	19.25
Cyclin-K	CCNK_HUMAN	CCNK	287	14	40
Protein AATF	AATF_HUMAN	AATF	286.8	14	8.75
Metal transporter CNNM2	CNNM2_HUMAN	CNNM2	285.5	14	20.52
DNA topoisomerase 3-alpha	TOP3A_HUMAN	TOP3A	279.9	14	13.79
Probable histidine--tRNA ligase, mitochondrial	SYHM_HUMAN	HARS2	279	14	14.82
Monoacylglycerol lipase ABHD12	ABD12_HUMAN	ABHD12	276.4	14	26.88
Integrin alpha-6	ITA6_HUMAN	ITGA6	272.4	14	9.74
WASH complex subunit 7	A0A087X256_HUMAN	KIAA1033	267.9	14	11.58
Translation initiation factor IF-2, mitochondrial	IF2M_HUMAN	MTIF2	261.6	14	11.97
Sterol O-acyltransferase 1	SOAT1_HUMAN	SOAT1	249.5	14	18.73
Receptor-type tyrosine-protein phosphatase F	PTPRF_HUMAN	PTPRF	238.6	14	10.59
Zinc phosphodiesterase ELAC protein 2	RNZ2_HUMAN	ELAC2	237.2	14	16.95
Condensin-2 complex subunit G2	CNDG2_HUMAN	NCAPG2	230.9	14	12.86
WAS protein family homolog 6	WASH6_HUMAN	WASH6P	529.8	13	36.02
SH3 domain-binding protein 1	3BP1_HUMAN	SH3BP1	521.6	13	30.96
Adenylosuccinate lyase	PUR8_HUMAN	ADSL	503	13	24.59
Sentrin-specific protease 3	SENP3_HUMAN	SENP3	502.5	13	17.77
Sorting nexin-17	SNX17_HUMAN	SNX17	454.5	13	23.83
Radical S-adenosyl methionine domain-containing protein 1, mitochondrial	RSAD1_HUMAN	RSAD1	452.5	13	19.46
Protein pelota homolog	PELO_HUMAN	PELO	437.8	13	23.64
Transmembrane emp24 domain-containing protein 1	TMED1_HUMAN	TMED1	433.3	13	19.38
Ras-related protein Rab-8A	RAB8A_HUMAN	RAB8A	419	13	29.95
AT-rich interactive domain-containing protein 3A	ARI3A_HUMAN	ARID3A	412.8	13	27.49
Peroxiredoxin-5, mitochondrial	PRDX5_HUMAN	PRDX5	410.5	13	42.52
ATP-dependent 6-phosphofructokinase, muscle type	PFKAM_HUMAN	PFKM	408.8	13	14.92
Signal transducing adapter molecule 2	STAM2_HUMAN	STAM2	406.9	13	33.14
mRNA-capping enzyme	MCE1_HUMAN	RNGTT	405.6	13	12.37
Ras-related protein Rab-10	RAB10_HUMAN	RAB10	403.8	13	36
NADH dehydrogenase [ubiquinone] 1 beta subcomplex subunit 10	NDUBA_HUMAN	NDUFB10	403.7	13	43.6
E3 SUMO-protein ligase PIAS3	PIAS3_HUMAN	PIAS3	399.8	13	22.93
Plasma serine protease inhibitor	IPSP_HUMAN	SERPINA5	399	13	16.5
Protein flightless-1 homolog	FLII_HUMAN	FLII	398.9	13	12.53
Adenylate kinase 2, mitochondrial	KAD2_HUMAN	AK2	393.9	13	40.17
Lipase maturation factor 2	LMF2_HUMAN	LMF2	393.5	13	18.95
Aladin	AAAS_HUMAN	AAAS	391.2	13	33.88
DNA polymerase delta subunit 2	DPOD2_HUMAN	POLD2	389.1	13	31.98
WD40 repeat-containing protein SMU1	SMU1_HUMAN	SMU1	385.8	13	14.04
Protein S100-A9	S10A9_HUMAN	S100A9	377.1	13	69.3
CLIP-associating protein 1	CLAP1_HUMAN	CLASP1	370	13	9.82
DNA mismatch repair protein Msh3	MSH3_HUMAN	MSH3	368.6	13	15.13
Protein unc-45 homolog A	UN45A_HUMAN	UNC45A	363	13	14.85
Serine/arginine-rich splicing factor 6	SRSF6_HUMAN	SRSF6	359.6	13	11.34
Tetratricopeptide repeat protein 30A	TT30A_HUMAN	TTC30A	358.7	13	9.02
C-type mannose receptor 2	MRC2_HUMAN	MRC2	357.4	13	10.75
Cullin-4B	CUL4B_HUMAN	CUL4B	356.3	13	8.43
Mitochondrial pyruvate carrier 2	MPC2_HUMAN	MPC2	355.3	13	37.79
Leukocyte surface antigen CD47	CD47_HUMAN	CD47	352.3	13	30.34
NADH-ubiquinone oxidoreductase chain 1	NU1M_HUMAN	MT-ND1	345.5	13	33.65
cTAGE family member 5	CTGE5_HUMAN	CTAGE5	340.9	13	13.62
Beta-2-syntrophin	SNTB2_HUMAN	SNTB2	340.5	13	20.93
Nuclear receptor coactivator 1	NCOA1_HUMAN	NCOA1	330.9	13	14.71
Superoxide dismutase [Mn], mitochondrial	SODM_HUMAN	SOD2	330.4	13	38.74
WASH complex subunit strumpellin	STRUM_HUMAN	KIAA0196	330.4	13	11.82
26S protease regulatory subunit 6B	PRS6B_HUMAN	PSMC4	328.2	13	21.77
Protein numb homolog	NUMB_HUMAN	NUMB	326.2	13	24.71
DNA replication factor Cdt1	CDT1_HUMAN	CDT1	322.4	13	19.96
Lysophosphatidylcholine acyltransferase 2	PCAT2_HUMAN	LPCAT2	319	13	15.99
CNK3/IPCEF1 fusion protein long isoform	G9CGD6_HUMAN	CNKSR3	311.5	13	22.36
Chromobox protein homolog 2	CBX2_HUMAN	CBX2	311.3	13	34.59
Mitochondrial import receptor subunit TOM5 homolog	F8W8Z9_HUMAN	TOMM5	311	13	32.65
Phosphatidate cytidylyltransferase, mitochondrial	TAM41_HUMAN	TAMM41	309.2	13	18.4
Pumilio homolog 1	Q5T1Z8_HUMAN	PUM1	309.1	13	24.43
KDEL motif-containing protein 2	KDEL2_HUMAN	KDELC2	308.4	13	9.86
Threonine--tRNA ligase, cytoplasmic	SYTC_HUMAN	TARS	301.6	13	17.86
Aspartyl/asparaginyl beta-hydroxylase	ASPH_HUMAN	ASPH	299.5	13	16.87
Retinol dehydrogenase 14	RDH14_HUMAN	RDH14	296.6	13	25.6
Sulfhydryl oxidase 1	QSOX1_HUMAN	QSOX1	291.5	13	10.44
Condensin-2 complex subunit D3	CNDD3_HUMAN	NCAPD3	290	13	14.49
CCA tRNA nucleotidyltransferase 1, mitochondrial	TRNT1_HUMAN	TRNT1	289.4	13	19.81
Epidermal growth factor receptor substrate 15-like 1	M0R165_HUMAN	EPS15L1	285	13	19.71
Equilibrative nucleoside transporter 1	S29A1_HUMAN	SLC29A1	284.2	13	19.25
Plasma membrane calcium-transporting ATPase 4	AT2B4_HUMAN	ATP2B4	282.7	13	10.17
COP9 signalosome complex subunit 2	CSN2_HUMAN	COPS2	280.2	13	27.11
Integrator complex subunit 7	INT7_HUMAN	INTS7	275.7	13	5.3
Liprin-alpha-1	LIPA1_HUMAN	PPFIA1	275.6	13	10.82
Dystrobrevin alpha	DTNA_HUMAN	DTNA	267.2	13	14.8
Adenylate cyclase type 6	ADCY6_HUMAN	ADCY6	265.6	13	12.5
Malonyl-CoA decarboxylase, mitochondrial	DCMC_HUMAN	MLYCD	265.4	13	19.68
Transcription factor Sp2	SP2_HUMAN	SP2	247.5	13	29.36
Dual specificity protein kinase TTK	TTK_HUMAN	TTK	246.5	13	15.05
Cilia- and flagella-associated protein 97	CFA97_HUMAN	CFAP97	227.9	13	16.92
Dynein assembly factor 5, axonemal	DAAF5_HUMAN	DNAAF5	587.1	12	10.99
Keratinocyte proline-rich protein	KPRP_HUMAN	KPRP	495.5	12	34.71
Glutaryl-CoA dehydrogenase, mitochondrial	GCDH_HUMAN	GCDH	493.6	12	27.85
Aminoacyl tRNA synthase complex-interacting multifunctional protein 2	AIMP2_HUMAN	AIMP2	487.1	12	31.87
Eukaryotic translation initiation factor 3 subunit G	EIF3G_HUMAN	EIF3G	454.4	12	33.75
NADH dehydrogenase [ubiquinone] 1 beta subcomplex subunit 2, mitochondrial	NDUB2_HUMAN	NDUFB2	443.1	12	48.57
Transcription termination factor 2	TTF2_HUMAN	TTF2	429.4	12	16.09
AP-3 complex subunit mu-1	AP3M1_HUMAN	AP3M1	427.9	12	22.73
G patch domain-containing protein 2-like	GPT2L_HUMAN	GPATCH2L	421.4	12	19.71
WD repeat-containing protein 13	WDR13_HUMAN	WDR13	421.4	12	34.43
Bifunctional UDP-N-acetylglucosamine 2-epimerase/N-acetylmannosamine kinase	GLCNE_HUMAN	GNE	421.1	12	13.11
Coronin-7	CORO7_HUMAN	CORO7	420.2	12	10.5
CDGSH iron-sulfur domain-containing protein 2	CISD2_HUMAN	CISD2	419.1	12	57.04
MAGUK p55 subfamily member 2	MPP2_HUMAN	MPP2	419.1	12	21.44
Exocyst complex component 3	EXOC3_HUMAN	EXOC3	415.3	12	21.03
mRNA-decapping enzyme 1B	DCP1B_HUMAN	DCP1B	408.8	12	23.82
Heat shock-related 70 kDa protein 2	HSP72_HUMAN	HSPA2	406.1	12	14.4
DNA polymerase delta subunit 3	DPOD3_HUMAN	POLD3	396.2	12	18.88
Mitochondrial import inner membrane translocase subunit Tim13	TIM13_HUMAN	TIMM13	394.3	12	53.68
DNA polymerase subunit gamma-2, mitochondrial	DPOG2_HUMAN	POLG2	394.1	12	16.08
Exosome complex component RRP45	EXOS9_HUMAN	EXOSC9	393.8	12	18.91
Nuclear receptor-binding protein	NRBP_HUMAN	NRBP1	393.5	12	21.5
26S proteasome non-ATPase regulatory subunit 5	PSMD5_HUMAN	PSMD5	387	12	24.01
Dermcidin	DCD_HUMAN	DCD	385.9	12	56.36
Splicing factor 3B subunit 3	SF3B3_HUMAN	SF3B3	385.8	12	11.67
Nucleobindin-1	NUCB1_HUMAN	NUCB1	384.3	12	30.15
Endophilin-A2	SH3G1_HUMAN	SH3GL1	382.1	12	13.59
Transmembrane emp24 domain-containing protein 5	TMED5_HUMAN	TMED5	379.1	12	36.68
Nuclear pore complex protein Nup107	NU107_HUMAN	NUP107	376.3	12	14.81
Endoplasmic reticulum resident protein 44	ERP44_HUMAN	ERP44	374	12	17.24
La-related protein 7	LARP7_HUMAN	LARP7	370.6	12	19.24
Peptidyl-tRNA hydrolase 2, mitochondrial	PTH2_HUMAN	PTRH2	367.5	12	51.4
Dystrophia myotonica WD repeat-containing protein	DMWD_HUMAN	DMWD	366.6	12	25.07
Nuclear respiratory factor 1	NRF1_HUMAN	NRF1	364.2	12	33.64
Tryptophan--tRNA ligase, mitochondrial	SYWM_HUMAN	WARS2	363.8	12	30
Reticulon-3	RTN3_HUMAN	RTN3	363.2	12	16.09
Transmembrane and TPR repeat-containing protein 3	TMTC3_HUMAN	TMTC3	361.5	12	21.97
Glutamyl-tRNA(Gln) amidotransferase subunit B, mitochondrial	GATB_HUMAN	GATB	360.9	12	22.08
Afadin- and alpha-actinin-binding protein	ADIP_HUMAN	SSX2IP	360.1	12	11.96
Importin-11	IPO11_HUMAN	IPO11	357.6	12	8.51
RNA polymerase I-specific transcription initiation factor RRN3	RRN3_HUMAN	RRN3	345.8	12	14.13
Kinesin-like protein KIF11	KIF11_HUMAN	KIF11	344.8	12	10.7
Zinc finger protein RFP	TRI27_HUMAN	TRIM27	341.2	12	21.83
Elongation factor 1-beta	EF1B_HUMAN	EEF1B2	339.3	12	26.22
Eukaryotic translation initiation factor 3 subunit H	EIF3H_HUMAN	EIF3H	337.2	12	29.26
G patch domain-containing protein 2	GPTC2_HUMAN	GPATCH2	333.7	12	19.89
Mitochondrial import inner membrane translocase subunit Tim23	TIM23_HUMAN	TIMM23	333.4	12	28.71
Protein transport protein Sec24C	G5EA31_HUMAN	SEC24C	331	12	24.66
1-acyl-sn-glycerol-3-phosphate acyltransferase delta	PLCD_HUMAN	AGPAT4	329.9	12	20.37
Vasculin-like protein 1	GPBL1_HUMAN	GPBP1L1	329.8	12	26.16
Transmembrane protein 43	TMM43_HUMAN	TMEM43	328.4	12	30.75
Targeting protein for Xklp2	TPX2_HUMAN	TPX2	328.3	12	17.27
Magnesium transporter protein 1	A0A087WU53_HUMAN	MAGT1	326.2	12	20.16
Tropomyosin alpha-3 chain	TPM3_HUMAN	TPM3	324.3	12	31.05
Leucine-rich repeat flightless-interacting protein 2	LRRF2_HUMAN	LRRFIP2	321.4	12	21.25
Solute carrier family 2, facilitated glucose transporter member 1	GTR1_HUMAN	SLC2A1	321.4	12	12.6
Probable Xaa-Pro aminopeptidase 3	XPP3_HUMAN	XPNPEP3	319.9	12	31.76
Dyslexia-associated protein KIAA0319-like protein	K319L_HUMAN	KIAA0319L	318.8	12	11.25
Tyrosine-protein kinase SYK	KSYK_HUMAN	SYK	316.9	12	18.63
NEDD8 ultimate buster 1	NUB1_HUMAN	NUB1	316.8	12	14.96
Ubiquitin-protein ligase E3C	UBE3C_HUMAN	UBE3C	314.3	12	10.06
SH2 domain-containing adapter protein B	SHB_HUMAN	SHB	310.1	12	23.38
Polymerase delta-interacting protein 2	PDIP2_HUMAN	POLDIP2	309.5	12	30.43
Alpha-2-HS-glycoprotein	FETUA_HUMAN	AHSG	308.6	12	29.43
Alanine--tRNA ligase, cytoplasmic	SYAC_HUMAN	AARS	307.5	12	10.95
Amidophosphoribosyltransferase	PUR1_HUMAN	PPAT	306.9	12	27.08
Gamma-tubulin complex component 4	GCP4_HUMAN	TUBGCP4	305.1	12	13.66
Cartilage-associated protein	CRTAP_HUMAN	CRTAP	304.8	12	24.44
Metaxin-3	MTX3_HUMAN	MTX3	298.1	12	38.46
N-acetyltransferase 14	NAT14_HUMAN	NAT14	293.5	12	22.82
Cleavage stimulation factor subunit 2 tau variant	CSTFT_HUMAN	CSTF2T	286.2	12	29.87
D-glucuronyl C5-epimerase	GLCE_HUMAN	GLCE	285.8	12	19.12
Regulator of nonsense transcripts 1	RENT1_HUMAN	UPF1	281.6	12	16.12
Tripartite motif-containing protein 26	TRI26_HUMAN	TRIM26	274.1	12	17.07
AP-1 complex subunit mu-1	AP1M1_HUMAN	AP1M1	273.1	12	32.39
Ribosomal protein S6 kinase alpha-1	KS6A1_HUMAN	RPS6KA1	273	12	14.78
Zinc finger CCCH domain-containing protein 18	E7ERS3_HUMAN	ZC3H18	270.8	12	5.32
Aurora kinase B	AURKB_HUMAN	AURKB	269.9	12	22.38
Condensin complex subunit 3	CND3_HUMAN	NCAPG	266.6	12	12.51
SWI/SNF complex subunit SMARCC2	SMRC2_HUMAN	SMARCC2	260.2	12	13.72
Alpha-globin transcription factor CP2	TFCP2_HUMAN	TFCP2	257.9	12	23.51
Dipeptidyl peptidase 3	DPP3_HUMAN	DPP3	255.2	12	17.23
Tyrosine-protein phosphatase non-receptor type 9	PTN9_HUMAN	PTPN9	249.4	12	21.25
Zinc finger CCCH domain-containing protein 7B	Z3H7B_HUMAN	ZC3H7B	249.4	12	9.97
Interferon-related developmental regulator 1	IFRD1_HUMAN	IFRD1	243.6	12	25.94
Casein kinase II subunit alpha	CSK21_HUMAN	CSNK2A1	243.5	12	16.11
Autophagy-related protein 16-1	A16L1_HUMAN	ATG16L1	241.2	12	14
Pyruvate dehydrogenase phosphatase regulatory subunit, mitochondrial	PDPR_HUMAN	PDPR	630.9	11	16.5
E3 SUMO-protein ligase PIAS1	PIAS1_HUMAN	PIAS1	524	11	20.28
NADH dehydrogenase [ubiquinone] 1 alpha subcomplex subunit 5	NDUA5_HUMAN	NDUFA5	480.3	11	54.31
Protein FAM117B	F117B_HUMAN	FAM117B	465.8	11	24.45
14-3-3 protein theta	1433T_HUMAN	YWHAQ	456.4	11	27.75
UAP56-interacting factor	UIF_HUMAN	FYTTD1	446.6	11	35.85
Mitochondrial assembly of ribosomal large subunit protein 1	MASU1_HUMAN	MALSU1	434.2	11	41.45
Mitochondrial amidoxime-reducing component 1	MARC1_HUMAN	42795	432.1	11	19.21
Probable dimethyladenosine transferase	DIM1_HUMAN	DIMT1	428.9	11	23
Ubiquitin-conjugating enzyme E2 S	UBE2S_HUMAN	UBE2S	426.8	11	43.24
Ras-related protein Rab-1A	RAB1A_HUMAN	RAB1A	425.8	11	40
Eukaryotic translation initiation factor 5A-1	IF5A1_HUMAN	EIF5A	419.3	11	22.83
Protein kinase C and casein kinase substrate in neurons protein 3	PACN3_HUMAN	PACSIN3	414.7	11	17.45
Poly(U)-binding-splicing factor PUF60	PUF60_HUMAN	PUF60	413.3	11	29.16
Ancient ubiquitous protein 1	AUP1_HUMAN	AUP1	403.3	11	23.53
RNA pseudouridylate synthase domain-containing protein 3	RUSD3_HUMAN	RPUSD3	402.7	11	34.47
Arginase-2, mitochondrial	ARGI2_HUMAN	ARG2	399.9	11	20.34
Cdc42-interacting protein 4	CIP4_HUMAN	TRIP10	397.8	11	21.28
Chondroitin sulfate glucuronyltransferase	CHPF2_HUMAN	CHPF2	397.6	11	15.8
TIR domain-containing adapter molecule 2	TCAM2_HUMAN	TICAM2	395.7	11	25.74
rRNA methyltransferase 3, mitochondrial	MRM3_HUMAN	RNMTL1	388.1	11	20
Calcium/calmodulin-dependent protein kinase kinase 2	KKCC2_HUMAN	CAMKK2	387.1	11	14.8
Acid sphingomyelinase-like phosphodiesterase 3b	F8VWW8_HUMAN	SMPDL3B	385.3	11	18.18
Serine/threonine-protein kinase ULK3	ULK3_HUMAN	ULK3	383.9	11	18.64
Vesicle transport protein GOT1B	GOT1B_HUMAN	GOLT1B	381.4	11	33.33
Nucleoside diphosphate kinase 3	NDK3_HUMAN	NME3	379.6	11	37.28
Procollagen-lysine,2-oxoglutarate 5-dioxygenase 2	PLOD2_HUMAN	PLOD2	378.3	11	12.27
Chromatin assembly factor 1 subunit B	CAF1B_HUMAN	CHAF1B	376	11	9.66
26S protease regulatory subunit 6A	PRS6A_HUMAN	PSMC3	375.9	11	22.1
Probable ATP-dependent RNA helicase DDX20	DDX20_HUMAN	DDX20	374.4	11	16.38
Transmembrane protein 41B	TM41B_HUMAN	TMEM41B	372.9	11	26.46
Paralemmin-1	PALM_HUMAN	PALM	372.7	11	29.72
RNA-binding protein NOB1	NOB1_HUMAN	NOB1	368.1	11	15.53
Methylglutaconyl-CoA hydratase, mitochondrial	AUHM_HUMAN	AUH	365.3	11	23.6
Poly(rC)-binding protein 1	PCBP1_HUMAN	PCBP1	365.2	11	16.01
Complex I assembly factor TIMMDC1, mitochondrial	TIDC1_HUMAN	TIMMDC1	364.7	11	32.63
Zinc finger protein 768	ZN768_HUMAN	ZNF768	361.8	11	25.93
Kinesin-like protein KIF2C	KIF2C_HUMAN	KIF2C	359.6	11	15.17
Phosphatidylinositol 5-phosphate 4-kinase type-2 alpha	PI42A_HUMAN	PIP4K2A	356.8	11	27.09
E3 ubiquitin-protein ligase TRIM11	TRI11_HUMAN	TRIM11	356.5	11	15.38
DNA repair protein XRCC1	XRCC1_HUMAN	XRCC1	353.4	11	15.96
Zinc transporter 5	ZNT5_HUMAN	SLC30A5	349.2	11	10.98
Exportin-5	XPO5_HUMAN	XPO5	348.5	11	6.98
FAD-dependent oxidoreductase domain-containing protein 1	FXRD1_HUMAN	FOXRED1	348.4	11	8.05
Double-stranded RNA-specific adenosine deaminase	DSRAD_HUMAN	ADAR	346	11	9.08
Ras-specific guanine nucleotide-releasing factor RalGPS2	RGPS2_HUMAN	RALGPS2	345.8	11	11.32
Protein arginine N-methyltransferase 3	ANM3_HUMAN	PRMT3	345.4	11	35.39
Peroxiredoxin-4	PRDX4_HUMAN	PRDX4	344.4	11	23.62
Bifunctional lysine-specific demethylase and histidyl-hydroxylase NO66	NO66_HUMAN	NO66	340.8	11	12.48
Ras-related protein Rab-5B	RAB5B_HUMAN	RAB5B	340.7	11	31.63
Cullin-2	CUL2_HUMAN	CUL2	340.6	11	10.47
Cob(I)yrinic acid a,c-diamide adenosyltransferase, mitochondrial	MMAB_HUMAN	MMAB	340.3	11	25.2
TOM1-like protein 1	I3NI44_HUMAN	TOM1L1	339.9	11	42.33
Activating signal cointegrator 1	TRIP4_HUMAN	TRIP4	338.3	11	21.86
High affinity cationic amino acid transporter 1	CTR1_HUMAN	SLC7A1	334.9	11	24.48
ATP synthase subunit e, mitochondrial	ATP5I_HUMAN	ATP5I	332.3	11	62.32
Protein TANC1	TANC1_HUMAN	TANC1	331.8	11	9.08
SWI/SNF-related matrix-associated actin-dependent regulator of chromatin subfamily A member 5	SMCA5_HUMAN	SMARCA5	329.3	11	8.94
UDP-glucose 6-dehydrogenase	UGDH_HUMAN	UGDH	328.3	11	14.17
Non-syndromic hearing impairment protein 5	DFNA5_HUMAN	DFNA5	328.1	11	26.81
Copine-3	CPNE3_HUMAN	CPNE3	324.6	11	23.84
Vesicle-associated membrane protein-associated protein B/C	VAPB_HUMAN	VAPB	322.8	11	18.52
Dehydrogenase/reductase SDR family member 7	DHRS7_HUMAN	DHRS7	322.3	11	25.07
Zinc finger protein with KRAB and SCAN domains 1	ZKSC1_HUMAN	ZKSCAN1	320	11	22.74
Disks large homolog 2	DLG2_HUMAN	DLG2	319.5	11	16.41
ATP-dependent RNA helicase DDX55	DDX55_HUMAN	DDX55	317.3	11	14.67
Serine/threonine-protein kinase D1	KPCD1_HUMAN	PRKD1	312.7	11	21.38
ATP-citrate synthase	ACLY_HUMAN	ACLY	312.4	11	10.63
Protein disulfide-isomerase TMX3	TMX3_HUMAN	TMX3	311.7	11	21.59
Coatomer subunit gamma-2	COPG2_HUMAN	COPG2	310.8	11	11.37
Peroxisomal acyl-coenzyme A oxidase 1	ACOX1_HUMAN	ACOX1	309.6	11	20.91
Glutaredoxin-related protein 5, mitochondrial	GLRX5_HUMAN	GLRX5	309.5	11	57.32
Nuclear pore complex protein Nup50	NUP50_HUMAN	NUP50	308.6	11	14.53
SH2 domain-containing protein 4A	SH24A_HUMAN	SH2D4A	308.5	11	21.15
Coxsackievirus and adenovirus receptor	CXAR_HUMAN	CXADR	308.2	11	20.82
Golgin subfamily A member 5	GOGA5_HUMAN	GOLGA5	308	11	16.35
4-aminobutyrate aminotransferase, mitochondrial	GABT_HUMAN	ABAT	307.6	11	18.2
Protein FAM53C	FA53C_HUMAN	FAM53C	306.6	11	23.21
Serine/threonine-protein kinase Nek9	NEK9_HUMAN	NEK9	306.5	11	22.47
SPATS2-like protein	SPS2L_HUMAN	SPATS2L	304.3	11	19.84
Serine/threonine-protein kinase PAK 2	PAK2_HUMAN	PAK2	303.1	11	13.93
DNA polymerase delta catalytic subunit	DPOD1_HUMAN	POLD1	302.4	11	16.26
Centrosomal protein CEP57L1	CE57L_HUMAN	CEP57L1	297.7	11	26.09
Threonylcarbamoyladenosine tRNA methylthiotransferase	CDKAL_HUMAN	CDKAL1	295.7	11	12.26
Testis-expressed sequence 2 protein	TEX2_HUMAN	TEX2	293.2	11	8.34
Zinc finger BED domain-containing protein 1	ZBED1_HUMAN	ZBED1	293.1	11	15.13
Mitochondrial genome maintenance exonuclease 1	MGME1_HUMAN	MGME1	290.7	11	23.55
BRCA2 and CDKN1A-interacting protein	BCCIP_HUMAN	BCCIP	288.9	11	21.12
Paraplegin	SPG7_HUMAN	SPG7	288.2	11	21.76
Acyl carrier protein, mitochondrial	ACPM_HUMAN	NDUFAB1	287.4	11	24.36
Gamma-adducin	ADDG_HUMAN	ADD3	287.1	11	13.03
Actin-related protein 2/3 complex subunit 2	ARPC2_HUMAN	ARPC2	286.5	11	27.33
Kazrin	KAZRN_HUMAN	KAZN	286	11	20.52
Retinoblastoma-binding protein 5	RBBP5_HUMAN	RBBP5	285.4	11	15.06
Tetratricopeptide repeat protein 37	TTC37_HUMAN	TTC37	284.8	11	9.46
Transcription factor E2-alpha	TFE2_HUMAN	TCF3	283.9	11	19.76
Mitofusin-2	MFN2_HUMAN	MFN2	278	11	17.97
Chromatin target of PRMT1 protein	CHTOP_HUMAN	CHTOP	274	11	18.15
Integrin alpha-5	ITA5_HUMAN	ITGA5	269.2	11	18.4
Protein HEXIM1	HEXI1_HUMAN	HEXIM1	263.6	11	15.88
E3 ubiquitin-protein ligase XIAP	XIAP_HUMAN	XIAP	261.7	11	15.69
Monocarboxylate transporter 10	MOT10_HUMAN	SLC16A10	259.1	11	34.95
Myotubularin-related protein 14	MTMRE_HUMAN	MTMR14	257.1	11	20.92
Ubiquinone biosynthesis monooxygenase COQ6, mitochondrial	COQ6_HUMAN	COQ6	579.1	10	29.35
AP-4 complex accessory subunit tepsin	AP4AT_HUMAN	ENTHD2	526.3	10	28.12
Acyl-coenzyme A thioesterase 8	ACOT8_HUMAN	ACOT8	521.6	10	23.2
Myocyte-specific enhancer factor 2C (Fragment)	A0A0D9SFV9_HUMAN	MEF2C	514.1	10	56.83
Non-histone chromosomal protein HMG-17	HMGN2_HUMAN	HMGN2	489.6	10	16.67
Tubulin alpha-1A chain	TBA1A_HUMAN	TUBA1A	488.3	10	6.43
TAR DNA-binding protein 43	TADBP_HUMAN	TARDBP	473.3	10	16.18
Replication factor C subunit 5	RFC5_HUMAN	RFC5	467.9	10	28.24
ER membrane protein complex subunit 2	EMC2_HUMAN	EMC2	458.6	10	32.66
Homeobox protein HMX3	HMX3_HUMAN	HMX3	452.3	10	16.81
GTP-binding protein Rheb	RHEB_HUMAN	RHEB	451.5	10	61.96
Vacuolar protein sorting-associated protein 51 homolog	VPS51_HUMAN	VPS51	423.7	10	14.71
THUMP domain-containing protein 3	THUM3_HUMAN	THUMPD3	423.5	10	17.95
Dehydrogenase/reductase SDR family member 7B	DRS7B_HUMAN	DHRS7B	419.4	10	24.31
Dolichyl-diphosphooligosaccharide--protein glycosyltransferase subunit DAD1	DAD1_HUMAN	DAD1	415.6	10	30.97
26S proteasome non-ATPase regulatory subunit 14	PSDE_HUMAN	PSMD14	415.3	10	20.65
Putative heat shock protein HSP 90-beta 2	H90B2_HUMAN	HSP90AB2P	414.8	10	10.5
Glutathione reductase, mitochondrial	GSHR_HUMAN	GSR	409	10	10.15
39S ribosomal protein L30, mitochondrial	RM30_HUMAN	MRPL30	407	10	25.65
Epithelial splicing regulatory protein 2	ESRP2_HUMAN	ESRP2	405.8	10	14.23
Heat shock 70 kDa protein 13	HSP13_HUMAN	HSPA13	399.7	10	20.38
Sodium-coupled neutral amino acid transporter 2	S38A2_HUMAN	SLC38A2	399	10	13.04
RNA-binding protein Musashi homolog 2	MSI2H_HUMAN	MSI2	398.5	10	18.29
RNA polymerase II-associated factor 1 homolog	PAF1_HUMAN	PAF1	395.7	10	27.42
Acyl-coenzyme A thioesterase 13	ACO13_HUMAN	ACOT13	394.9	10	38.57
GrpE protein homolog 2, mitochondrial	GRPE2_HUMAN	GRPEL2	393.5	10	27.56
F-box only protein 11	FBX11_HUMAN	FBXO11	389.5	10	5.93
Protein disulfide-isomerase A5	PDIA5_HUMAN	PDIA5	383.6	10	23.51
Branched-chain-amino-acid aminotransferase, mitochondrial	BCAT2_HUMAN	BCAT2	381.8	10	36.48
2,4-dienoyl-CoA reductase, mitochondrial	DECR_HUMAN	DECR1	381.2	10	27.46
Eukaryotic translation initiation factor 4B	IF4B_HUMAN	EIF4B	380.7	10	11.71
NF-kappa-B-activating protein	NKAP_HUMAN	NKAP	377.6	10	12.77
55 kDa erythrocyte membrane protein	EM55_HUMAN	MPP1	376.7	10	23.61
Mitogen-activated protein kinase kinase kinase MLT	MLTK_HUMAN	ZAK	374.8	10	10.55
Importin subunit alpha-7	IMA7_HUMAN	KPNA6	374.4	10	11.94
N-acetylserotonin O-methyltransferase-like protein	ASML_HUMAN	ASMTL	374	10	14.81
Leucyl-cystinyl aminopeptidase	LCAP_HUMAN	LNPEP	371.6	10	11.9
Selenoprotein O	SELO_HUMAN	SELO	367.9	10	24.07
Transmembrane emp24 domain-containing protein 4	TMED4_HUMAN	TMED4	366.8	10	34.36
Diphthamide biosynthesis protein 2	DPH2_HUMAN	DPH2	366.7	10	16.97
General transcription factor IIF subunit 1	T2FA_HUMAN	GTF2F1	364.4	10	16.25
Small nuclear ribonucleoprotein-associated proteins B and B'	A8MT02_HUMAN	SNRPB	363.3	10	40.28
Serine/threonine-protein kinase D2	KPCD2_HUMAN	PRKD2	363	10	12.41
CD276 antigen	CD276_HUMAN	CD276	361.9	10	25.56
Phosphatidylserine synthase 1	PTSS1_HUMAN	PTDSS1	361	10	23.68
Flotillin-2	FLOT2_HUMAN	FLOT2	360.2	10	19.39
Protein LSM14 homolog B	LS14B_HUMAN	LSM14B	360	10	34.55
Condensin complex subunit 1	CND1_HUMAN	NCAPD2	353.7	10	7.85
STE20/SPS1-related proline-alanine-rich protein kinase	STK39_HUMAN	STK39	353.3	10	15.78
Ubiquitin-like modifier-activating enzyme ATG7	ATG7_HUMAN	ATG7	351.3	10	13.94
Galactosylgalactosylxylosylprotein 3-beta-glucuronosyltransferase 3	B3GA3_HUMAN	B3GAT3	349.7	10	11.75
Serine protease HTRA2, mitochondrial	HTRA2_HUMAN	HTRA2	349.2	10	24.67
Target of rapamycin complex 2 subunit MAPKAP1	SIN1_HUMAN	MAPKAP1	348	10	18.97
THO complex subunit 4	THOC4_HUMAN	ALYREF	348	10	39.69
Signal peptidase complex catalytic subunit SEC11A	SC11A_HUMAN	SEC11A	347.6	10	26.26
Nucleoside diphosphate-linked moiety X motif 19	NUD19_HUMAN	NUDT19	346.6	10	22.4
F-box/LRR-repeat protein 18	FXL18_HUMAN	FBXL18	342.5	10	17.89
Syntaxin-12	STX12_HUMAN	STX12	342.3	10	29.71
GTP:AMP phosphotransferase AK3, mitochondrial	KAD3_HUMAN	AK3	342.1	10	37.44
NADH dehydrogenase [ubiquinone] 1 alpha subcomplex assembly factor 4	NDUF4_HUMAN	NDUFAF4	340.7	10	27.43
Transportin-3	TNPO3_HUMAN	TNPO3	336.4	10	6.49
Glycerophosphodiester phosphodiesterase domain-containing protein 1	GDPD1_HUMAN	GDPD1	335.5	10	24.84
Lysine-rich nucleolar protein 1	KNOP1_HUMAN	KNOP1	335.1	10	25.11
Signal peptidase complex subunit 2	E9PI68_HUMAN	SPCS2	334	10	32.68
Conserved oligomeric Golgi complex subunit 2	COG2_HUMAN	COG2	333.5	10	16.94
Endoplasmic reticulum-Golgi intermediate compartment protein 2	ERGI2_HUMAN	ERGIC2	333.2	10	21.22
26S protease regulatory subunit 4	PRS4_HUMAN	PSMC1	330.4	10	17.95
Coiled-coil domain-containing protein 61	CCD61_HUMAN	CCDC61	326.9	10	10.16
Thioredoxin reductase 2, mitochondrial	D3YTF8_HUMAN	TXNRD2	325.6	10	15.77
Alpha-centractin	ACTZ_HUMAN	ACTR1A	324.1	10	30.85
Nuclear-interacting partner of ALK	NIPA_HUMAN	ZC3HC1	323.6	10	15.74
Adenosine 3'-phospho 5'-phosphosulfate transporter 1	S35B2_HUMAN	SLC35B2	318.9	10	39.58
Transducin beta-like protein 2	TBL2_HUMAN	TBL2	318.2	10	13.87
MMS19 nucleotide excision repair protein homolog	MMS19_HUMAN	MMS19	316.9	10	9.51
HCLS1-binding protein 3	H1BP3_HUMAN	HS1BP3	314.2	10	34.95
SUN domain-containing protein 1	SUN1_HUMAN	SUN1	313	10	10.59
Acetyl-coenzyme A transporter 1	ACATN_HUMAN	SLC33A1	308.1	10	14.57
NADH dehydrogenase [ubiquinone] 1 beta subcomplex subunit 11, mitochondrial	NDUBB_HUMAN	NDUFB11	306.1	10	32.03
Protein Spindly	SPDLY_HUMAN	SPDL1	305.4	10	12.45
AP-4 complex subunit beta-1	AP4B1_HUMAN	AP4B1	304.5	10	12.31
Zinc finger protein 512	G3XAG1_HUMAN	ZNF512	301.5	10	7.07
Histone lysine demethylase PHF8	PHF8_HUMAN	PHF8	300.7	10	7.26
NEDD4-binding protein 1	N4BP1_HUMAN	N4BP1	299.2	10	11.83
Septin-2	SEPT2_HUMAN	SEPT2	298.6	10	26.26
Glutamine--fructose-6-phosphate aminotransferase [isomerizing] 2	GFPT2_HUMAN	GFPT2	297.5	10	18.18
Ectonucleotide pyrophosphatase/phosphodiesterase family member 1	ENPP1_HUMAN	ENPP1	296.8	10	13.08
Origin recognition complex subunit 3	ORC3_HUMAN	ORC3	295.8	10	8.86
Katanin p60 ATPase-containing subunit A1	KTNA1_HUMAN	KATNA1	295.5	10	21.79
CDP-diacylglycerol--inositol 3-phosphatidyltransferase	B3KY94_HUMAN	CDIPT	294.9	10	49.37
Glycosylphosphatidylinositol anchor attachment 1 protein	GPAA1_HUMAN	GPAA1	294.2	10	24.64
Aminopeptidase B	AMPB_HUMAN	RNPEP	291.5	10	16.77
Protein spinster homolog 1 (Fragment)	H3BR82_HUMAN	SPNS1	288.6	10	20.26
Sterile alpha and TIR motif-containing protein 1	SARM1_HUMAN	SARM1	287.9	10	16.16
TATA element modulatory factor	TMF1_HUMAN	TMF1	286.7	10	15.83
Protein phosphatase 1 regulatory subunit 12A	MYPT1_HUMAN	PPP1R12A	286	10	9.55
SLAIN motif-containing protein 2	SLAI2_HUMAN	SLAIN2	285.9	10	18.76
Glypican-4	GPC4_HUMAN	GPC4	284	10	18.17
Uncharacterized protein C18orf8	MIC1_HUMAN	C18orf8	281.2	10	13.7
RNA-binding protein Nova-1	NOVA1_HUMAN	NOVA1	280.3	10	39.61
Prolyl 4-hydroxylase subunit alpha-1	P4HA1_HUMAN	P4HA1	278.4	10	13.67
NEDD4-like E3 ubiquitin-protein ligase WWP1	WWP1_HUMAN	WWP1	276	10	8.03
Coiled-coil domain-containing protein 120	CC120_HUMAN	CCDC120	272.5	10	22.69
RUN and FYVE domain-containing protein 2	RUFY2_HUMAN	RUFY2	268.9	10	15.11
HBS1-like protein	HBS1L_HUMAN	HBS1L	266	10	14.77
Cleft lip and palate transmembrane protein 1-like protein	CLP1L_HUMAN	CLPTM1L	265.3	10	8.18
Protein argonaute-1	AGO1_HUMAN	AGO1	263.4	10	11.44
NADH dehydrogenase [ubiquinone] complex I, assembly factor 7	NDUF7_HUMAN	NDUFAF7	261.4	10	21.77
HLA class I histocompatibility antigen, B-46 alpha chain	1B46_HUMAN	HLA-B	251.1	10	6.91
Leucine-rich repeat-containing protein 45	LRC45_HUMAN	LRRC45	249.3	10	17.46
Tyrosine-protein kinase JAK1	JAK1_HUMAN	JAK1	245.3	10	9.71
Ubiquinone biosynthesis protein COQ9, mitochondrial	COQ9_HUMAN	COQ9	239.6	10	39.31
Nucleolar GTP-binding protein 2	NOG2_HUMAN	GNL2	235.6	10	9.71
Alpha-catulin	CTNL1_HUMAN	CTNNAL1	232.3	10	12.26
Heat shock 70 kDa protein 4	HSP74_HUMAN	HSPA4	229.7	10	14.05
ELMO domain-containing protein 2	ELMD2_HUMAN	ELMOD2	489.9	9	18.77
Nucleus accumbens-associated protein 1	NACC1_HUMAN	NACC1	466.7	9	18.6
Transcriptional activator protein Pur-alpha	PURA_HUMAN	PURA	438.7	9	16.77
Mitochondrial fission 1 protein	FIS1_HUMAN	FIS1	431.7	9	26.32
Armadillo repeat-containing protein 6	ARMC6_HUMAN	ARMC6	423.3	9	10.98
Vacuole membrane protein 1	VMP1_HUMAN	VMP1	422.6	9	24.38
Myocyte-specific enhancer factor 2D	MEF2D_HUMAN	MEF2D	406.6	9	37.18
Unconventional prefoldin RPB5 interactor 1	RMP_HUMAN	URI1	406	9	21.68
Adrenodoxin, mitochondrial	ADX_HUMAN	FDX1	404.4	9	20.65
Transcription initiation factor TFIID subunit 2	TAF2_HUMAN	TAF2	404.1	9	8.84
Probable arginine--tRNA ligase, mitochondrial	SYRM_HUMAN	RARS2	403.5	9	17.47
Hexokinase-2	HXK2_HUMAN	HK2	397.5	9	11.34
Cleavage and polyadenylation specificity factor subunit 7	CPSF7_HUMAN	CPSF7	397.2	9	26.46
Receptor expression-enhancing protein 5	REEP5_HUMAN	REEP5	394.6	9	20.11
HCG1984214, isoform CRA_a	I3L0E3_HUMAN	hCG_1984214	389.3	9	25.78
Nucleolar complex protein 4 homolog	NOC4L_HUMAN	NOC4L	388.7	9	7.56
WD and tetratricopeptide repeats protein 1	WDTC1_HUMAN	WDTC1	383.2	9	12.2
Transmembrane protein 109	TM109_HUMAN	TMEM109	380.5	9	56.79
Complex III assembly factor LYRM7	LYRM7_HUMAN	LYRM7	379.8	9	41.35
CCR4-NOT transcription complex subunit 4	CNOT4_HUMAN	CNOT4	378.6	9	25.35
YTH domain-containing family protein 1	YTHD1_HUMAN	YTHDF1	376.3	9	21.82
Ribonuclease inhibitor	RINI_HUMAN	RNH1	375.6	9	14.1
Actin-related protein 2/3 complex subunit 4	ARPC4_HUMAN	ARPC4	374	9	42.78
Desmocollin-1	DSC1_HUMAN	DSC1	373.2	9	5.15
Lanosterol synthase	ERG7_HUMAN	LSS	368.5	9	11.75
Glypican-3	GPC3_HUMAN	GPC3	368.4	9	10.69
CCR4-NOT transcription complex subunit 11	CNO11_HUMAN	CNOT11	367.7	9	38.63
Histone H2B type 2-E	H2B2E_HUMAN	HIST2H2BE	367.6	9	9.52
Caldesmon	CALD1_HUMAN	CALD1	366.4	9	13.11
Cell division control protein 42 homolog	CDC42_HUMAN	CDC42	364.8	9	26.18
Uncharacterized protein	A0A0B4J203_HUMAN		364.6	9	10.6
Glycylpeptide N-tetradecanoyltransferase 1	NMT1_HUMAN	NMT1	363.7	9	14.72
Calcium uptake protein 2, mitochondrial	MICU2_HUMAN	MICU2	363.5	9	24.88
Bcl-2-like protein 13	A0A087WX97_HUMAN	BCL2L13	361	9	21.41
Transmembrane protein 102	TM102_HUMAN	TMEM102	360.3	9	14.17
Ras-related protein Rab-7L1	RAB7L_HUMAN	RAB29	358.7	9	44.33
Protein lin-7 homolog A	LIN7A_HUMAN	LIN7A	355.2	9	30.9
Adenosylhomocysteinase 3	SAHH3_HUMAN	AHCYL2	354.4	9	16.37
2-oxoisovalerate dehydrogenase subunit beta, mitochondrial	ODBB_HUMAN	BCKDHB	350.6	9	35.46
Importin-8	IPO8_HUMAN	IPO8	350.4	9	8.2
Mitochondrial 10-formyltetrahydrofolate dehydrogenase	AL1L2_HUMAN	ALDH1L2	348.9	9	11.16
Fascin	FSCN1_HUMAN	FSCN1	348.8	9	14.81
Nuclear autoantigenic sperm protein	NASP_HUMAN	NASP	347.5	9	14.09
HAUS augmin-like complex subunit 8	HAUS8_HUMAN	HAUS8	347.4	9	16.59
Histidine triad nucleotide-binding protein 2, mitochondrial	HINT2_HUMAN	HINT2	345	9	26.99
Sorting nexin-30	SNX30_HUMAN	SNX30	344.7	9	20.37
Probable ATP-dependent RNA helicase DDX10	DDX10_HUMAN	DDX10	343.6	9	13.14
Sphingosine kinase 2	SPHK2_HUMAN	SPHK2	343.5	9	29.17
28S ribosomal protein S11, mitochondrial	RT11_HUMAN	MRPS11	343.1	9	38.34
Condensin complex subunit 2	CND2_HUMAN	NCAPH	342.4	9	12.42
Glutamyl-tRNA(Gln) amidotransferase subunit A, mitochondrial	GATA_HUMAN	QRSL1	340.9	9	18.37
Sideroflexin-3	SFXN3_HUMAN	SFXN3	339.8	9	16
Beta-1,4-glucuronyltransferase 1	B4GA1_HUMAN	B4GAT1	339.4	9	20.72
NHL repeat-containing protein 2	NHLC2_HUMAN	NHLRC2	337.4	9	10.19
Serine/threonine-protein phosphatase 2A 56 kDa regulatory subunit alpha isoform	2A5A_HUMAN	PPP2R5A	336.4	9	25.1
Protein ecdysoneless homolog	ECD_HUMAN	ECD	336.1	9	17.24
Retinol dehydrogenase 13	RDH13_HUMAN	RDH13	335.9	9	29.91
Ribosome-recycling factor, mitochondrial	RRFM_HUMAN	MRRF	335.7	9	28.24
Peroxisomal membrane protein PEX14	PEX14_HUMAN	PEX14	332.6	9	36.6
Sterol-4-alpha-carboxylate 3-dehydrogenase, decarboxylating	NSDHL_HUMAN	NSDHL	332	9	15.55
ERO1-like protein alpha	ERO1A_HUMAN	ERO1A	331.7	9	14.32
Histone acetyltransferase type B catalytic subunit	HAT1_HUMAN	HAT1	331	9	7.64
Endoplasmic reticulum mannosyl-oligosaccharide 1,2-alpha-mannosidase	MA1B1_HUMAN	MAN1B1	330.6	9	15.31
ADP-ribosylation factor GTPase-activating protein 1	ARFG1_HUMAN	ARFGAP1	330.5	9	17.73
Phosphorylated adapter RNA export protein	PHAX_HUMAN	PHAX	330.1	9	28.93
NADH-ubiquinone oxidoreductase chain 2	NU2M_HUMAN	MT-ND2	329.9	9	40.35
E3 ubiquitin-protein ligase RING1	RING1_HUMAN	RING1	325.8	9	36.45
Protein-glutamine gamma-glutamyltransferase K	TGM1_HUMAN	TGM1	325.2	9	25.46
Minor histocompatibility antigen H13	HM13_HUMAN	HM13	323.9	9	14.32
Calcium-binding mitochondrial carrier protein SCaMC-2	SCMC2_HUMAN	SLC25A25	323.8	9	21.96
Hydroxyacylglutathione hydrolase, mitochondrial	GLO2_HUMAN	HAGH	320.7	9	27.92
Splicing factor U2AF 65 kDa subunit	U2AF2_HUMAN	U2AF2	320.5	9	22.74
Fukutin-related protein	FKRP_HUMAN	FKRP	319.8	9	12.93
7-dehydrocholesterol reductase	DHCR7_HUMAN	DHCR7	319.3	9	8.84
RUN and FYVE domain-containing protein 1	RUFY1_HUMAN	RUFY1	319	9	11.16
NADH dehydrogenase [ubiquinone] iron-sulfur protein 4, mitochondrial	NDUS4_HUMAN	NDUFS4	316.6	9	49.71
Coiled-coil domain-containing protein 6	CCDC6_HUMAN	CCDC6	315.2	9	21.73
Cytoplasmic dynein 1 light intermediate chain 1	DC1L1_HUMAN	DYNC1LI1	313	9	20.65
Corneodesmosin	CDSN_HUMAN	CDSN	312.3	9	36.11
Sn1-specific diacylglycerol lipase beta	DGLB_HUMAN	DAGLB	311.2	9	15.18
Cleavage and polyadenylation specificity factor subunit 2	CPSF2_HUMAN	CPSF2	310.2	9	13.43
Proteasome activator complex subunit 3	PSME3_HUMAN	PSME3	309.7	9	26.77
Pre-mRNA-processing factor 6	PRP6_HUMAN	PRPF6	308.9	9	7.1
Zinc transporter ZIP10	S39AA_HUMAN	SLC39A10	307.2	9	10.11
AP-2 complex subunit sigma	M0QYZ2_HUMAN	AP2S1	306	9	26.58
Serine/threonine-protein kinase Chk2	CHK2_HUMAN	CHEK2	305.3	9	17.58
5-demethoxyubiquinone hydroxylase, mitochondrial	COQ7_HUMAN	COQ7	301.1	9	31.8
Probable E3 ubiquitin-protein ligase makorin-2	MKRN2_HUMAN	MKRN2	297.3	9	20.64
V-type proton ATPase subunit d 1	F5GYQ1_HUMAN	ATP6V0D1	297.1	9	15.05
Poly(A) RNA polymerase GLD2	GLD2_HUMAN	PAPD4	296.7	9	22.11
Alpha-1,3-mannosyl-glycoprotein 2-beta-N-acetylglucosaminyltransferase	MGAT1_HUMAN	MGAT1	296.6	9	23.37
Rab GTPase-binding effector protein 2	RABE2_HUMAN	RABEP2	296.1	9	25.48
Anoctamin-6	ANO6_HUMAN	ANO6	291.8	9	12.97
CCR4-NOT transcription complex subunit 10	CNO10_HUMAN	CNOT10	290.8	9	12.81
E3 ubiquitin-protein ligase CHIP	CHIP_HUMAN	STUB1	289.6	9	20.79
F-box only protein 7	FBX7_HUMAN	FBXO7	286.9	9	15.9
AarF domain-containing protein kinase 4	ADCK4_HUMAN	ADCK4	284.8	9	22.06
Mitochondrial import inner membrane translocase subunit Tim9	TIM9_HUMAN	TIMM9	283.7	9	38.2
Prolyl endopeptidase-like	PPCEL_HUMAN	PREPL	282.5	9	11.97
Catalase	CATA_HUMAN	CAT	281.8	9	14.42
Ras-related protein Rab-18	RAB18_HUMAN	RAB18	279	9	21.36
Probable methyltransferase-like protein 15	MET15_HUMAN	METTL15	275.6	9	17.44
Sarcolemmal membrane-associated protein	SLMAP_HUMAN	SLMAP	275.1	9	11.71
Insulin-like growth factor-binding protein 7	IBP7_HUMAN	IGFBP7	271	9	15.96
Cytochrome b5	CYB5_HUMAN	CYB5A	270.7	9	42.54
Poliovirus receptor	PVR_HUMAN	PVR	270.5	9	16.31
Glutamate-rich protein 1	ERIC1_HUMAN	ERICH1	269.9	9	33.63
Glutathione S-transferase C-terminal domain-containing protein	GSTCD_HUMAN	GSTCD	269.7	9	18.48
Mediator of RNA polymerase II transcription subunit 26	MED26_HUMAN	MED26	260.7	9	16.5
Lysosome-associated membrane glycoprotein 2	LAMP2_HUMAN	LAMP2	256.3	9	9.27
Phosphorylase b kinase regulatory subunit beta	KPBB_HUMAN	PHKB	256	9	6.22
H2.0-like homeobox protein	HLX_HUMAN	HLX	252.5	9	17.21
Immunoglobulin superfamily member 3	IGSF3_HUMAN	IGSF3	250.4	9	8.88
Brain-specific angiogenesis inhibitor 1-associated protein 2	BAIP2_HUMAN	BAIAP2	248.3	9	14.37
SWI/SNF-related matrix-associated actin-dependent regulator of chromatin subfamily D member 2	SMRD2_HUMAN	SMARCD2	247.7	9	21.18
Coiled-coil domain-containing protein 138	CC138_HUMAN	CCDC138	242.8	9	14.59
Probable ATP-dependent RNA helicase DDX46	DDX46_HUMAN	DDX46	242.7	9	8.34
Alanine aminotransferase 2	ALAT2_HUMAN	GPT2	233.8	9	22.94
[Pyruvate dehydrogenase [acetyl-transferring]]-phosphatase 1, mitochondrial	PDP1_HUMAN	PDP1	226.2	9	18.62
Cullin-3	CUL3_HUMAN	CUL3	220.1	9	9.77
HBS1-like protein	HBS1L_HUMAN	HBS1L	504	8	18.51
Translational activator of cytochrome c oxidase 1	TACO1_HUMAN	TACO1	492.8	8	19.87
Phosphatidylinositol glycan anchor biosynthesis class U protein	PIGU_HUMAN	PIGU	464.4	8	10.57
Peroxiredoxin-6	PRDX6_HUMAN	PRDX6	457.3	8	19.2
E3 ubiquitin-protein ligase ARIH1	ARI1_HUMAN	ARIH1	455	8	8.8
Protein S100-A8	S10A8_HUMAN	S100A8	441.3	8	47.31
Mitochondrial dicarboxylate carrier	DIC_HUMAN	SLC25A10	438.4	8	25.34
Uncharacterized protein	U3KQK5_HUMAN		435.6	8	5.49
Methyltransferase-like protein 7A	MET7A_HUMAN	METTL7A	435.5	8	11.89
NADH dehydrogenase [ubiquinone] flavoprotein 2, mitochondrial	NDUV2_HUMAN	NDUFV2	432.5	8	20.08
Actin-like protein 6A	ACL6A_HUMAN	ACTL6A	431.2	8	22.14
TOX high mobility group box family member 4	TOX4_HUMAN	TOX4	428.4	8	33.82
Phosphatidylglycerophosphatase and protein-tyrosine phosphatase 1	E9PQM0_HUMAN	PTPMT1	425.5	8	44.05
Solute carrier family 35 member E1	S35E1_HUMAN	SLC35E1	425.1	8	14.39
Retinal dehydrogenase 2	AL1A2_HUMAN	ALDH1A2	424.7	8	10.04
Ragulator complex protein LAMTOR1	F5H3Y3_HUMAN	LAMTOR1	424.4	8	43.12
Wiskott-Aldrich syndrome protein family member 2	WASF2_HUMAN	WASF2	421.4	8	30.92
A-kinase anchor protein 8-like	AKP8L_HUMAN	AKAP8L	419.9	8	11.76
GTPase Era, mitochondrial	ERAL1_HUMAN	ERAL1	416.3	8	14.42
14-3-3 protein gamma	1433G_HUMAN	YWHAG	412.2	8	16.19
Cytokine receptor-like factor 3	CRLF3_HUMAN	CRLF3	410.2	8	21.49
GTP-binding protein 1	GTPB1_HUMAN	GTPBP1	410.1	8	19.58
PHD finger protein 23	PHF23_HUMAN	PHF23	408.5	8	18.11
Serine/threonine-protein phosphatase 2A regulatory subunit B'' subunit beta	P2R3B_HUMAN	PPP2R3B	408.3	8	17.74
Histone-arginine methyltransferase CARM1	CARM1_HUMAN	CARM1	399.1	8	8.06
Cytochrome c oxidase subunit 7C, mitochondrial	COX7C_HUMAN	COX7C	395.2	8	31.75
Rho guanine nucleotide exchange factor 6	ARHG6_HUMAN	ARHGEF6	395	8	12.89
E3 SUMO-protein ligase PIAS4	PIAS4_HUMAN	PIAS4	394.3	8	12.35
Bleomycin hydrolase	BLMH_HUMAN	BLMH	392.6	8	13.63
Protein SYNJ2BP-COX16 (Fragment)	A0A087WUM0_HUMAN	SYNJ2BP-COX16	391.1	8	52.15
Zinc finger protein Eos	IKZF4_HUMAN	IKZF4	390.6	8	8.72
G patch domain-containing protein 4	GPTC4_HUMAN	GPATCH4	388.6	8	19.96
TRAF-type zinc finger domain-containing protein 1	TRAD1_HUMAN	TRAFD1	387.8	8	21.48
Peptidyl-prolyl cis-trans isomerase FKBP2	FKBP2_HUMAN	FKBP2	387.1	8	19.01
Galactokinase	GALK1_HUMAN	GALK1	386.9	8	10.97
Septin-6	SEPT6_HUMAN	SEPT6	385.1	8	23.96
UPF0562 protein C7orf55	CG055_HUMAN	C7orf55	384	8	7.42
Uncharacterized protein C2orf47, mitochondrial	CB047_HUMAN	C2orf47	383	8	28.52
ARF GTPase-activating protein GIT1	GIT1_HUMAN	GIT1	381.6	8	13.4
Protein sel-1 homolog 1	SE1L1_HUMAN	SEL1L	379.9	8	10.08
Glomulin	GLMN_HUMAN	GLMN	378.5	8	12.96
Spindle and kinetochore-associated protein 3	SKA3_HUMAN	SKA3	376.1	8	16.75
Mannose-P-dolichol utilization defect 1 protein (Fragment)	J3QQZ4_HUMAN	MPDU1	376	8	62.5
Tubulin beta-2B chain	TBB2B_HUMAN	TUBB2B	374.4	8	3.6
DNA polymerase epsilon subunit 2	DPOE2_HUMAN	POLE2	373.5	8	25.81
Endoplasmic reticulum-Golgi intermediate compartment protein 1	ERGI1_HUMAN	ERGIC1	373.2	8	14.83
NEDD8-activating enzyme E1 catalytic subunit	UBA3_HUMAN	UBA3	368.9	8	14.04
UDP-N-acetylhexosamine pyrophosphorylase	UAP1_HUMAN	UAP1	365.4	8	17.43
Mediator of RNA polymerase II transcription subunit 17	MED17_HUMAN	MED17	364.4	8	12.44
Tyrosine-protein phosphatase non-receptor type 6	PTN6_HUMAN	PTPN6	363.6	8	9.46
Cochlin	COCH_HUMAN	COCH	363	8	11.82
Serine/threonine-protein phosphatase 2A 55 kDa regulatory subunit B alpha isoform	2ABA_HUMAN	PPP2R2A	358.1	8	15.54
Short/branched chain specific acyl-CoA dehydrogenase, mitochondrial	ACDSB_HUMAN	ACADSB	357.4	8	13.66
Protein RER1	RER1_HUMAN	RER1	355.4	8	30.1
Replication factor C subunit 3	RFC3_HUMAN	RFC3	355.2	8	16.85
Catechol O-methyltransferase (Fragment)	H7BZ45_HUMAN	COMT	352.9	8	63.82
Glycosaminoglycan xylosylkinase	XYLK_HUMAN	FAM20B	350.9	8	11
Syntaxin-18	STX18_HUMAN	STX18	348.8	8	18.21
A-kinase anchor protein 10, mitochondrial	AKA10_HUMAN	AKAP10	348.6	8	13.9
GPI-anchor transamidase	GPI8_HUMAN	PIGK	348.1	8	12.15
Serine/arginine-rich splicing factor 11	SRS11_HUMAN	SRSF11	347.4	8	28.31
Cytoplasmic FMR1-interacting protein 1	CYFP1_HUMAN	CYFIP1	346.9	8	4.55
Death-associated protein kinase 3	DAPK3_HUMAN	DAPK3	345.3	8	13
Cleavage stimulation factor subunit 3	CSTF3_HUMAN	CSTF3	343	8	11.72
Histone H1x	H1X_HUMAN	H1FX	342.5	8	32.39
Barrier-to-autointegration factor	BAF_HUMAN	BANF1	339.4	8	48.31
CD2 antigen cytoplasmic tail-binding protein 2	CD2B2_HUMAN	CD2BP2	338	8	22.29
Sodium-coupled neutral amino acid transporter 1	F8VX04_HUMAN	SLC38A1	337.8	8	23.06
Serrate RNA effector molecule homolog	SRRT_HUMAN	SRRT	336.5	8	15.02
Peroxisomal NADH pyrophosphatase NUDT12	NUD12_HUMAN	NUDT12	335.6	8	19.48
Mitochondrial fission factor	MFF_HUMAN	MFF	334.3	8	34.71
Endoplasmic reticulum metallopeptidase 1	ERMP1_HUMAN	ERMP1	332.7	8	8.19
Syntaxin-16	STX16_HUMAN	STX16	332.4	8	27.08
UPF0600 protein C5orf51	CE051_HUMAN	C5orf51	330.3	8	29.93
Neuroepithelial cell-transforming gene 1 protein	ARHG8_HUMAN	NET1	325.7	8	25.84
Serine/threonine-protein kinase 24	STK24_HUMAN	STK24	325.7	8	21.35
Cyclin-dependent kinase 17	CDK17_HUMAN	CDK17	322.2	8	10.52
Polyadenylate-binding protein-interacting protein 1	PAIP1_HUMAN	PAIP1	321.7	8	46.14
SUMO-activating enzyme subunit 2	SAE2_HUMAN	UBA2	321.6	8	10.16
NADH dehydrogenase [ubiquinone] iron-sulfur protein 6, mitochondrial	NDUS6_HUMAN	NDUFS6	321.1	8	39.52
Sodium/potassium-transporting ATPase subunit beta-1	AT1B1_HUMAN	ATP1B1	320.5	8	10.3
Formin-binding protein 1-like	FBP1L_HUMAN	FNBP1L	318.7	8	12.23
Beta-arrestin-2	ARRB2_HUMAN	ARRB2	318.5	8	20.81
Telomere length regulation protein TEL2 homolog	TELO2_HUMAN	TELO2	317.6	8	13.02
Cullin-associated NEDD8-dissociated protein 2	CAND2_HUMAN	CAND2	315	8	13.35
SRSF protein kinase 2	SRPK2_HUMAN	SRPK2	313.4	8	19.33
Saccharopine dehydrogenase-like oxidoreductase	SCPDL_HUMAN	SCCPDH	312.9	8	21.68
Transmembrane protein 245	TM245_HUMAN	TMEM245	312.7	8	24.7
Cytochrome c oxidase subunit 7A-related protein, mitochondrial	COX7R_HUMAN	COX7A2L	310.9	8	31.58
Merlin	MERL_HUMAN	NF2	307.4	8	9.52
Actin filament-associated protein 1	AFAP1_HUMAN	AFAP1	306.8	8	18.49
Very-long-chain (3R)-3-hydroxyacyl-CoA dehydratase 2	HACD2_HUMAN	HACD2	304.2	8	26.38
2',3'-cyclic-nucleotide 3'-phosphodiesterase	CN37_HUMAN	CNP	303.3	8	13.3
Putative methyltransferase NSUN6	NSUN6_HUMAN	NSUN6	303.3	8	15.99
[truncated: 603 more rows]

## Sheet: Common contaminants
Description	Uniprot accession	Gene name	Best Score	PSMs	Coverage (%)
28S ribosomal protein S10, mitochondrial	RT10_HUMAN	MRPS10	308.2	7	21.89
28S ribosomal protein S12, mitochondrial	RT12_HUMAN	MRPS12	344.5	9	8.7
28S ribosomal protein S14, mitochondrial	RT14_HUMAN	MRPS14	426.6	14	36.72
28S ribosomal protein S15, mitochondrial	RT15_HUMAN	MRPS15	334.2	11	28.02
28S ribosomal protein S18a, mitochondrial	RT18A_HUMAN	MRPS18A	381.4	20	44.39
28S ribosomal protein S18b, mitochondrial	RT18B_HUMAN	MRPS18B	384.7	17	56.98
28S ribosomal protein S2, mitochondrial	RT02_HUMAN	MRPS2	390.2	26	35.47
28S ribosomal protein S21, mitochondrial	RT21_HUMAN	MRPS21	413.9	6	29.88
28S ribosomal protein S22, mitochondrial	RT22_HUMAN	MRPS22	443.3	28	40.56
28S ribosomal protein S23, mitochondrial	RT23_HUMAN	MRPS23	409.4	28	56.84
28S ribosomal protein S24, mitochondrial	RT24_HUMAN	MRPS24	341.5	13	32.93
28S ribosomal protein S25, mitochondrial	RT25_HUMAN	MRPS25	399.8	22	53.76
28S ribosomal protein S26, mitochondrial	RT26_HUMAN	MRPS26	371	21	46.83
28S ribosomal protein S27, mitochondrial	RT27_HUMAN	MRPS27	475.1	31	39.13
28S ribosomal protein S28, mitochondrial	RT28_HUMAN	MRPS28	452.8	8	41.18
28S ribosomal protein S29, mitochondrial	RT29_HUMAN	DAP3	496.8	32	37.19
28S ribosomal protein S30, mitochondrial	RT30_HUMAN	MRPS30	430	25	39.41
28S ribosomal protein S31, mitochondrial	RT31_HUMAN	MRPS31	366.7	19	24.05
28S ribosomal protein S33, mitochondrial	RT33_HUMAN	MRPS33	367.6	6	30.19
28S ribosomal protein S34, mitochondrial	C9JJ19_HUMAN	MRPS34	415.8	19	41.78
28S ribosomal protein S35, mitochondrial	RT35_HUMAN	MRPS35	415.7	19	43.03
28S ribosomal protein S36, mitochondrial	RT36_HUMAN	MRPS36	369.8	2	13.59
28S ribosomal protein S5, mitochondrial	RT05_HUMAN	MRPS5	370.3	24	22.79
28S ribosomal protein S6, mitochondrial	RT06_HUMAN	MRPS6	385.1	12	43.2
28S ribosomal protein S7, mitochondrial	RT07_HUMAN	MRPS7	406.9	18	28.51
28S ribosomal protein S9, mitochondrial	RT09_HUMAN	MRPS9	355.5	40	48.48
39S ribosomal protein L1, mitochondrial	RM01_HUMAN	MRPL1	408.6	29	50.15
39S ribosomal protein L10, mitochondrial	RM10_HUMAN	MRPL10	344.4	8	20.69
39S ribosomal protein L11, mitochondrial	RM11_HUMAN	MRPL11	370.4	30	70.83
39S ribosomal protein L13, mitochondrial	RM13_HUMAN	MRPL13	350.1	17	40.45
39S ribosomal protein L14, mitochondrial	RM14_HUMAN	MRPL14	348.6	10	47.59
39S ribosomal protein L15, mitochondrial	RM15_HUMAN	MRPL15	312.1	28	51.01
39S ribosomal protein L16, mitochondrial	RM16_HUMAN	MRPL16	329.2	16	28.29
39S ribosomal protein L17, mitochondrial	RM17_HUMAN	MRPL17	276.9	17	45.14
39S ribosomal protein L18, mitochondrial	RM18_HUMAN	MRPL18	328.6	15	26.67
39S ribosomal protein L19, mitochondrial	RM19_HUMAN	MRPL19	351.1	23	38.36
39S ribosomal protein L2, mitochondrial	RM02_HUMAN	MRPL2	310.6	12	42.62
39S ribosomal protein L20, mitochondrial	RM20_HUMAN	MRPL20	327.3	11	26.85
39S ribosomal protein L21, mitochondrial	RM21_HUMAN	MRPL21	370.3	10	32.68
39S ribosomal protein L22, mitochondrial	RM22_HUMAN	MRPL22	356	13	37.38
39S ribosomal protein L23, mitochondrial	RM23_HUMAN	MRPL23	506.4	17	73.2
39S ribosomal protein L24, mitochondrial	RM24_HUMAN	MRPL24	299.1	22	49.07
39S ribosomal protein L27, mitochondrial	RM27_HUMAN	MRPL27	370.9	17	45.95
39S ribosomal protein L28, mitochondrial	RM28_HUMAN	MRPL28	435.4	40	60.94
39S ribosomal protein L3, mitochondrial	RM03_HUMAN	MRPL3	356	18	26.44
39S ribosomal protein L34, mitochondrial	M0R226_HUMAN	MRPL34	294.8	8	21.74
39S ribosomal protein L37, mitochondrial	RM37_HUMAN	MRPL37	377.7	25	30.73
39S ribosomal protein L38, mitochondrial	RM38_HUMAN	MRPL38	350.7	31	33.68
39S ribosomal protein L39, mitochondrial	RM39_HUMAN	MRPL39	399.4	28	37.28
39S ribosomal protein L4, mitochondrial	RM04_HUMAN	MRPL4	362.2	29	51.77
39S ribosomal protein L40, mitochondrial	RM40_HUMAN	MRPL40	443	16	38.83
39S ribosomal protein L41, mitochondrial	RM41_HUMAN	MRPL41	378.4	15	65.69
39S ribosomal protein L42, mitochondrial	RM42_HUMAN	MRPL42	299.3	6	21.83
39S ribosomal protein L43, mitochondrial	RM43_HUMAN	MRPL43	307.9	8	25.12
39S ribosomal protein L44, mitochondrial	RM44_HUMAN	MRPL44	396.4	26	37.05
39S ribosomal protein L45, mitochondrial	RM45_HUMAN	MRPL45	273.5	9	19.61
39S ribosomal protein L46, mitochondrial	RM46_HUMAN	MRPL46	552.7	25	54.84
39S ribosomal protein L47, mitochondrial	RM47_HUMAN	MRPL47	372.6	21	32.4
39S ribosomal protein L48, mitochondrial	RM48_HUMAN	MRPL48	317.3	8	17.92
39S ribosomal protein L49, mitochondrial	RM49_HUMAN	MRPL49	390.6	15	48.19
39S ribosomal protein L50, mitochondrial	RM50_HUMAN	MRPL50	401.1	9	46.84
39S ribosomal protein L51, mitochondrial	RM51_HUMAN	MRPL51	221.4	6	32.81
39S ribosomal protein L52, mitochondrial	RM52_HUMAN	MRPL52	440.6	5	36.59
39S ribosomal protein L53, mitochondrial	RM53_HUMAN	MRPL53	360.6	4	14.29
39S ribosomal protein L54, mitochondrial	RM54_HUMAN	MRPL54	335.5	7	26.09
39S ribosomal protein L55, mitochondrial	RM55_HUMAN	MRPL55	347.8	12	41.41
39S ribosomal protein L9, mitochondrial	RM09_HUMAN	MRPL9	323.7	12	28.09
40S ribosomal protein S10	RS10_HUMAN	RPS10	458.1	39	50.3
40S ribosomal protein S11	RS11_HUMAN	RPS11	523.7	118	60.76
40S ribosomal protein S12	RS12_HUMAN	RPS12	522	26	34.09
40S ribosomal protein S13	RS13_HUMAN	RPS13	610.9	73	74.83
40S ribosomal protein S14	RS14_HUMAN	RPS14	563.5	66	48.34
40S ribosomal protein S15	RS15_HUMAN	RPS15	400.4	30	60
40S ribosomal protein S15a	RS15A_HUMAN	RPS15A	445.7	66	68.46
40S ribosomal protein S16	RS16_HUMAN	RPS16	457.7	56	58.22
40S ribosomal protein S17	RS17_HUMAN	RPS17	499.1	17	42.96
40S ribosomal protein S18	RS18_HUMAN	RPS18	448.6	77	73.68
40S ribosomal protein S19	RS19_HUMAN	RPS19	439.9	36	57.93
40S ribosomal protein S2	RS2_HUMAN	RPS2	527.3	115	50.85
40S ribosomal protein S20	RS20_HUMAN	RPS20	640.3	48	49.58
40S ribosomal protein S21	RS21_HUMAN	RPS21	301.9	6	59.04
40S ribosomal protein S23	RS23_HUMAN	RPS23	543.9	44	30.07
40S ribosomal protein S25	RS25_HUMAN	RPS25	362.5	9	22.4
40S ribosomal protein S26	RS26_HUMAN	RPS26	425.2	43	40
40S ribosomal protein S27	RS27_HUMAN	RPS27	507.7	39	35.71
40S ribosomal protein S27-like	RS27L_HUMAN	RPS27L	462.4	10	15.48
40S ribosomal protein S28	RS28_HUMAN	RPS28	500.7	4	30.43
40S ribosomal protein S29	RS29_HUMAN	RPS29	395.9	14	33.93
40S ribosomal protein S3	RS3_HUMAN	RPS3	633.9	202	74.07
40S ribosomal protein S30	RS30_HUMAN	FAU	389.6	13	20.34
40S ribosomal protein S3a	RS3A_HUMAN	RPS3A	758.3	104	55.3
40S ribosomal protein S4, X isoform	RS4X_HUMAN	RPS4X	543.2	101	62.36
40S ribosomal protein S5	RS5_HUMAN	RPS5	415.6	31	48.53
40S ribosomal protein S6	RS6_HUMAN	RPS6	551.5	91	39.36
40S ribosomal protein S7	RS7_HUMAN	RPS7	612.8	141	84.02
40S ribosomal protein S8	RS8_HUMAN	RPS8	538.4	106	49.52
40S ribosomal protein S9	RS9_HUMAN	RPS9	500	138	59.28
40S ribosomal protein SA (Fragment)	C9J9K3_HUMAN	RPSA	442.8	13	46.21
60S acidic ribosomal protein P0	RLA0_HUMAN	RPLP0	482.3	52	58.99
60S acidic ribosomal protein P1	RLA1_HUMAN	RPLP1	402.8	17	78.07
60S acidic ribosomal protein P2	RLA2_HUMAN	RPLP2	421	11	53.04
60S ribosomal export protein NMD3	NMD3_HUMAN	NMD3	260.9	3	8.55
60S ribosomal protein L10	F8W7C6_HUMAN	RPL10	494.2	109	67.48
60S ribosomal protein L10a	RL10A_HUMAN	RPL10A	459.5	37	48.85
60S ribosomal protein L11	RL11_HUMAN	RPL11	508.9	46	58.99
60S ribosomal protein L12	RL12_HUMAN	RPL12	508.1	25	33.94
60S ribosomal protein L13	RL13_HUMAN	RPL13	704.4	86	57.35
60S ribosomal protein L13a	RL13A_HUMAN	RPL13A	577.2	109	58.62
60S ribosomal protein L14	RL14_HUMAN	RPL14	491.8	38	35.35
60S ribosomal protein L15	RL15_HUMAN	RPL15	540.8	118	57.84
60S ribosomal protein L18	RL18_HUMAN	RPL18	545.7	68	48.94
60S ribosomal protein L18a	RL18A_HUMAN	RPL18A	634.8	102	59.09
60S ribosomal protein L19	RL19_HUMAN	RPL19	400.7	51	44.9
60S ribosomal protein L21	RL21_HUMAN	RPL21	512.6	101	65.62
60S ribosomal protein L22	RL22_HUMAN	RPL22	474.9	29	46.87
60S ribosomal protein L23	RL23_HUMAN	RPL23	439	73	72.86
60S ribosomal protein L23a	RL23A_HUMAN	RPL23A	509.4	64	57.69
60S ribosomal protein L24	RL24_HUMAN	RPL24	525.2	80	53.5
60S ribosomal protein L26	RL26_HUMAN	RPL26	605.5	120	64.14
60S ribosomal protein L26-like 1	RL26L_HUMAN	RPL26L1	330.5	12	13.79
60S ribosomal protein L27	RL27_HUMAN	RPL27	341	34	52.94
60S ribosomal protein L27a	RL27A_HUMAN	RPL27A	458.4	55	49.32
60S ribosomal protein L28	RL28_HUMAN	RPL28	519.3	90	56.2
60S ribosomal protein L29	RL29_HUMAN	RPL29	456.3	35	35.85
60S ribosomal protein L3	RL3_HUMAN	RPL3	523.8	180	61.79
60S ribosomal protein L30	RL30_HUMAN	RPL30	259.7	9	26.96
60S ribosomal protein L31	RL31_HUMAN	RPL31	442.7	40	64
60S ribosomal protein L32	RL32_HUMAN	RPL32	366	42	41.48
60S ribosomal protein L34	RL34_HUMAN	RPL34	282.9	9	12.82
60S ribosomal protein L35	RL35_HUMAN	RPL35	456.8	27	33.33
60S ribosomal protein L35a	RL35A_HUMAN	RPL35A	281.9	11	40
60S ribosomal protein L36	RL36_HUMAN	RPL36	405.8	28	36.19
60S ribosomal protein L36a-like	RL36L_HUMAN	RPL36AL	327.5	17	43.4
60S ribosomal protein L37a	RL37A_HUMAN	RPL37A	560.5	7	19.57
60S ribosomal protein L38	RL38_HUMAN	RPL38	481.2	44	57.14
60S ribosomal protein L39	RL39_HUMAN	RPL39	393.9	21	25.49
60S ribosomal protein L4	RL4_HUMAN	RPL4	586.4	248	50.35
60S ribosomal protein L5	RL5_HUMAN	RPL5	400.7	76	43.43
60S ribosomal protein L6	RL6_HUMAN	RPL6	606.6	119	62.15
60S ribosomal protein L7	RL7_HUMAN	RPL7	500.3	145	60.08
60S ribosomal protein L7a	RL7A_HUMAN	RPL7A	479.3	115	56.77
60S ribosomal protein L7-like 1	RL7L_HUMAN	RPL7L1	420.7	11	29.67
60S ribosomal protein L8	RL8_HUMAN	RPL8	529.8	87	53.31
60S ribosomal protein L9	RL9_HUMAN	RPL9	545.8	100	67.19
Alpha-S1-casein	CAS1_BOVIN	(Common contaminant)	522.7	79	51.87
Alpha-S2-casein	CAS2_BOVIN	(Common contaminant)	382.1	106	44.59
Beta-casein	CASB_BOVIN	(Common contaminant)	530.3	137	78.12
Ig alpha-1 chain C region	IGHA1_HUMAN	IGHA1	401.6	19	29.46
Ig gamma-1 chain C region	A0A087WV47_HUMAN	IGHG1	422.8	140	35.41
Ig gamma-2 chain C region	IGHG2_HUMAN	IGHG2	387	15	7.98
Ig gamma-4 chain C region	IGHG4_HUMAN	IGHG4	336.1	10	13.15
Ig kappa chain C region	A0A087X1V9_HUMAN	IGKC	536.9	21	34.73
Ig kappa chain V-I region OU	KV114_HUMAN	(Common contaminant)	343.6	9	12.96
Ig kappa chain V-I region Roy	KV116_HUMAN	(Common contaminant)	343.6	20	42.59
Ig kappa chain V-III region NG9 (Fragment)	KV303_HUMAN	(Common contaminant)	447	5	25
Ig lambda-2 chain C regions	LAC2_HUMAN	IGLC2	385.4	6	33.96
Kappa-casein	CASK_BOVIN	(Common contaminant)	579	29	37.89
Keratin, type I cuticular Ha3-II	KT33B_HUMAN	KRT33B	425.9	10	17.08
Keratin, type I cuticular Ha6	KRT36_HUMAN	KRT36	369.9	4	14.99
Keratin, type I cytoskeletal 10	K1C10_HUMAN	KRT10	659.2	1199	78.94
Keratin, type I cytoskeletal 12	K1C12_HUMAN	KRT12	337.8	17	11.94
Keratin, type I cytoskeletal 13	K1C13_HUMAN	KRT13	445.1	45	31.88
Keratin, type I cytoskeletal 14	K1C14_HUMAN	KRT14	591.6	119	54.24
Keratin, type I cytoskeletal 15	K1C15_SHEEP	(Common contaminant)	378.4	36	31.79
Keratin, type I cytoskeletal 16	K1C16_HUMAN	KRT16	494.9	67	38.9
Keratin, type I cytoskeletal 17	K1C17_HUMAN	KRT17	397.7	21	28.24
Keratin, type I cytoskeletal 18	K1C18_HUMAN	KRT18	421.7	9	22.79
Keratin, type I cytoskeletal 9	K1C9_HUMAN	KRT9	803.5	720	90.37
Keratin, type I microfibrillar 48 kDa, component 8C-1	K1M1_SHEEP	(Common contaminant)	411.2	24	42.48
Keratin, type II cuticular Hb4	KRT84_HUMAN	KRT84	441.7	4	6.17
Keratin, type II cuticular Hb5	KRT85_HUMAN	KRT85	353.3	6	12.03
Keratin, type II cytoskeletal 1	K2C1_HUMAN	KRT1	818.8	1343	86.02
Keratin, type II cytoskeletal 1b	K2C1B_HUMAN	KRT77	436.4	34	31.31
Keratin, type II cytoskeletal 2 epidermal	K22E_HUMAN	(Common contaminant)	548.3	7	5.58
Keratin, type II cytoskeletal 2 epidermal	K22E_HUMAN	KRT2	661.7	789	89.51
Keratin, type II cytoskeletal 3	K2C3_HUMAN	KRT3	405.8	6	6.37
Keratin, type II cytoskeletal 4	K2C4_HUMAN	KRT4	403.7	18	35.02
Keratin, type II cytoskeletal 5	K2C5_HUMAN	KRT5	533.3	239	43.9
Keratin, type II cytoskeletal 6A	K2C6A_HUMAN	KRT6A	572.4	144	39.72
Keratin, type II cytoskeletal 6B	K2C6B_HUMAN	KRT6B	440.2	8	4.61
Keratin, type II cytoskeletal 6C	K2C6C_HUMAN	KRT6C	382.7	11	5.32
Keratin, type II cytoskeletal 73	K2C73_HUMAN	KRT73	343.9	20	9.63
Keratin, type II cytoskeletal 78	K2C78_HUMAN	KRT78	381.7	11	15.19
Keratin, type II cytoskeletal 79	K2C79_HUMAN	KRT79	316.6	6	19.44
Keratin, type II cytoskeletal 8	K2C8_HUMAN	KRT8	474.8	105	51.35
Keratin, type II microfibrillar	K2M1_SHEEP	(Common contaminant)	393.2	6	24.77
Keratin, type II microfibrillar, component 5	K2M3_SHEEP	(Common contaminant)	416	22	23.71
Keratin, type II microfibrillar, component 7C	K2M2_SHEEP	(Common contaminant)	347.4	4	6.72
Serum albumin	ALBU_BOVIN	(Common contaminant)	640.4	1017	82.37
Trypsin	TRYP_PIG	(Common contaminant)	579.4	666	54.54

## Sheet: Mitochondrial proteins
Description	Gene name
2,4-dienoyl CoA reductase 1, mitochondrial	DECR1
3-hydroxyisobutyrate dehydrogenase	HIBADH
3-hydroxyisobutyryl-Coenzyme A hydrolase	HIBCH
3-oxoacid CoA transferase 1	OXCT1
4-aminobutyrate aminotransferase	ABAT
5-methyltetrahydrofolate-homocysteine methyltransferase reductase	MTRR
A kinase (PRKA) anchor protein 1	AKAP1
A kinase (PRKA) anchor protein 10	AKAP10
abhydrolase domain containing 10	ABHD10
acetyl-Coenzyme A acetyltransferase 1	ACAT1
aconitase 2, mitochondrial	ACO2
acyl-CoA synthetase family member 3	ACSF3
acyl-CoA synthetase long-chain family member 1	ACSL1
acyl-CoA synthetase long-chain family member 3	ACSL3
acyl-CoA synthetase long-chain family member 4	ACSL4
acyl-CoA thioesterase 13	ACOT13
acyl-CoA thioesterase 2	ACOT2
acyl-CoA thioesterase 8	ACOT8
acyl-CoA thioesterase 9	ACOT9
acyl-Coenzyme A binding domain containing 3	ACBD3
acyl-Coenzyme A dehydrogenase family, member 9	ACAD9
acyl-Coenzyme A dehydrogenase, C-4 to C-12 straight chain	ACADM
acyl-Coenzyme A dehydrogenase, short/branched chain	ACADSB
acyl-Coenzyme A dehydrogenase, very long chain	ACADVL
acyl-Coenzyme A oxidase 1, palmitoyl	ACOX1
acylglycerol kinase	AGK
adaptor-related protein complex 2, mu 1 subunit	AP2M1
adenylate kinase 2	AK2
adenylate kinase 3	AK3
AFG3 ATPase family gene 3-like 2 (yeast)	AFG3L2
alanyl-tRNA synthetase 2, mitochondrial (putative)	AARS2
aldehyde dehydrogenase 1 family, member B1	ALDH1B1
aldehyde dehydrogenase 18 family, member A1	ALDH18A1
aldehyde dehydrogenase 2 family (mitochondrial)	ALDH2
aldehyde dehydrogenase 3 family, member A2	ALDH3A2
aldehyde dehydrogenase 4 family, member A1	ALDH4A1
aldehyde dehydrogenase 5 family, member A1	ALDH5A1
aldehyde dehydrogenase 6 family, member A1	ALDH6A1
aldehyde dehydrogenase 7 family, member A1	ALDH7A1
alkylglycerone phosphate synthase	AGPS
aminoadipate-semialdehyde synthase	AASS
apoptosis-inducing factor, mitochondrion-associated, 1	AIFM1
arginase, type II	ARG2
arginyl-tRNA synthetase 2, mitochondrial	RARS2
asparaginyl-tRNA synthetase 2, mitochondrial (putative)	NARS2
aspartyl-tRNA synthetase 2, mitochondrial	DARS2
ATP synthase mitochondrial F1 complex assembly factor 1	ATPAF1
ATP synthase, H+ transporting, mitochondrial F0 complex, subunit B1	ATP5F1
ATP synthase, H+ transporting, mitochondrial F0 complex, subunit d	ATP5H
ATP synthase, H+ transporting, mitochondrial F0 complex, subunit E	ATP5I
ATP synthase, H+ transporting, mitochondrial F0 complex, subunit F6	ATP5J
ATP synthase, H+ transporting, mitochondrial F0 complex, subunit G	ATP5L
ATP synthase, H+ transporting, mitochondrial F1 complex, alpha subunit 1, cardiac muscle	ATP5A1
ATP synthase, H+ transporting, mitochondrial F1 complex, beta polypeptide	ATP5B
ATP synthase, H+ transporting, mitochondrial F1 complex, delta subunit	ATP5D
ATP synthase, H+ transporting, mitochondrial F1 complex, gamma polypeptide 1	ATP5C1
ATP synthase, H+ transporting, mitochondrial F1 complex, O subunit	ATP5O
ATPase inhibitory factor 1	ATPIF1
ATPase, H+ transporting, lysosomal 70kDa, V1 subunit A	ATP6V1A
ATP-binding cassette, sub-family B (MDR/TAP), member 10	ABCB10
ATP-binding cassette, sub-family B (MDR/TAP), member 7	ABCB7
ATP-binding cassette, sub-family F (GCN20), member 2	ABCF2
AU RNA binding protein/enoyl-Coenzyme A hydratase	AUH
basigin (Ok blood group)	BSG
BCL2-associated X protein	BAX
BCL2-like 13 (apoptosis facilitator)	BCL2L13
BCS1-like (yeast)	BCS1L
branched chain aminotransferase 2, mitochondrial	BCAT2
branched chain keto acid dehydrogenase E1, alpha polypeptide	BCKDHA
branched chain keto acid dehydrogenase E1, beta polypeptide	BCKDHB
branched chain ketoacid dehydrogenase kinase	BCKDK
carnitine acetyltransferase	CRAT
carnitine palmitoyltransferase 2	CPT2
catalase	CAT
cathepsin D	CTSD
CDGSH iron sulfur domain 1	CISD1
CDP-diacylglycerol synthase (phosphatidate cytidylyltransferase) 2	CDS2
chromatin assembly factor 1, subunit B (p60)	CHAF1B
chromosome 2 open reading frame 47	C2orf47
citrate synthase	CS
clathrin, heavy chain (Hc)	CLTC
ClpP caseinolytic peptidase, ATP-dependent, proteolytic subunit homolog (E. coli)	CLPP
ClpX caseinolytic peptidase X homolog (E. coli)	CLPX
coenzyme Q5 homolog, methyltransferase (S. cerevisiae)	COQ5
coenzyme Q6 homolog, monooxygenase (S. cerevisiae)	COQ6
coenzyme Q7 homolog, ubiquinone (yeast)	COQ7
coenzyme Q9 homolog (S. cerevisiae)	COQ9
coiled-coil domain containing 44	TACO1
coiled-coil-helix-coiled-coil-helix domain containing 3	CHCHD3
coiled-coil-helix-coiled-coil-helix domain containing 4	CHCHD4
cold shock domain containing E1, RNA-binding	CSDE1
collagen, type IV, alpha 3 (Goodpasture antigen) binding protein	COL4A3BP
complement component 1, q subcomponent binding protein	C1QBP
coproporphyrinogen oxidase	CPOX
COX11 homolog, cytochrome c oxidase assembly protein (yeast)	COX11
COX15 homolog, cytochrome c oxidase assembly protein (yeast)	COX15
creatine kinase, brain	CKB
creatine kinase, mitochondrial 1A; creatine kinase, mitochondrial 1B	CKMT1A
cysteinyl-tRNA synthetase 2, mitochondrial (putative)	CARS2
cytochrome b5 reductase 3	CYB5R3
cytochrome b5 type A (microsomal)	CYB5A
cytochrome b5 type B (outer mitochondrial membrane)	CYB5B
cytochrome c oxidase subunit IV isoform 1	COX4I1
cytochrome c oxidase subunit Va	COX5A
cytochrome c oxidase subunit Vb	COX5B
cytochrome c oxidase subunit VIa polypeptide 1	COX6A1
cytochrome c oxidase subunit VIc	COX6C
cytochrome c oxidase subunit VIIa polypeptide 2 (liver)	COX7A2
cytochrome c oxidase subunit VIIa polypeptide 2 like	COX7A2L
cytochrome c oxidase subunit VIIc	COX7C
cytochrome c, somatic	CYCS
cytochrome c-1	CYC1
DEAD (Asp-Glu-Ala-Asp) box polypeptide 28	DDX28
DEAH (Asp-Glu-Ala-His) box polypeptide 30	DHX30
dehydrogenase E1 and transketolase domain containing 1	DHTKD1
dehydrogenase/reductase (SDR family) member 4	DHRS4
desmoplakin	DSP
diablo homolog (Drosophila)	DIABLO
dihydrolipoamide branched chain transacylase E2	DBT
dihydrolipoamide dehydrogenase	DLD
dihydrolipoamide S-acetyltransferase	DLAT
dihydrolipoamide S-succinyltransferase (E2 component of 2-oxo-glutarate complex); dihydrolipoamide S-succinyltransferase pseudogene (E2 component of 2-oxo-glutarate complex)	DLST
dihydroorotate dehydrogenase	DHODH
dihydropyrimidinase-like 2	DPYSL2
DnaJ (Hsp40) homolog, subfamily A, member 3	DNAJA3
DnaJ (Hsp40) homolog, subfamily C, member 11	DNAJC11
DnaJ (Hsp40) homolog, subfamily C, member 5	DNAJC5
dynamin 1-like	DNM1L
ECSIT homolog (Drosophila)	ECSIT
electron-transfer-flavoprotein, alpha polypeptide	ETFA
electron-transfer-flavoprotein, beta polypeptide	ETFB
electron-transferring-flavoprotein dehydrogenase	ETFDH
enoyl Coenzyme A hydratase 1, peroxisomal	ECH1
enoyl Coenzyme A hydratase domain containing 3	ECHDC3
enoyl Coenzyme A hydratase, short chain, 1, mitochondrial	ECHS1
ethylmalonic encephalopathy 1	ETHE1
FAD-dependent oxidoreductase domain containing 1	FOXRED1
family with sequence similarity 65, member B	FAM65B
ferredoxin 1	FDX1
ferredoxin reductase	FDXR
ferrochelatase (protoporphyria)	FECH
fission 1 (mitochondrial outer membrane) homolog (S. cerevisiae)	FIS1
FK506 binding protein 8, 38kDa	FKBP8
flap structure-specific endonuclease 1	FEN1
fumarate hydratase	FH
fumarylacetoacetate hydrolase domain containing 1	FAHD1
G elongation factor, mitochondrial 1	GFM1
G elongation factor, mitochondrial 2	GFM2
glioblastoma amplified sequence	GBAS
glutamate dehydrogenase 1	GLUD1
glutamic-oxaloacetic transaminase 2, mitochondrial (aspartate aminotransferase 2)	GOT2
glutaminase	GLS
glutaminyl-tRNA synthetase	QARS
glutamyl-tRNA synthetase 2, mitochondrial (putative)	EARS2
glutaredoxin 5	GLRX5
glutaryl-Coenzyme A dehydrogenase	GCDH
glutathione peroxidase 1	GPX1
glutathione reductase	GSR
glutathione S-transferase kappa 1	GSTK1
glycerol kinase 2	GK2
glycerol kinase 3 pseudogene; glycerol kinase	GK
glycerol-3-phosphate dehydrogenase 2 (mitochondrial)	GPD2
glycine dehydrogenase (decarboxylating)	GLDC
glycosyltransferase 8 domain containing 1	GLT8D1
glycyl-tRNA synthetase	GARS
granulin	GRN
GrpE-like 1, mitochondrial (E. coli)	GRPEL1
GrpE-like 2, mitochondrial (E. coli)	GRPEL2
GTP binding protein 3 (mitochondrial)	GTPBP3
HCLS1 associated protein X-1	HAX1
heat shock 10kDa protein 1 (chaperonin 10)	HSPE1
heat shock 60kDa protein 1 (chaperonin) pseudogene 5; heat shock 60kDa protein 1 (chaperonin) pseudogene 6; heat shock 60kDa protein 1 (chaperonin) pseudogene 1; heat shock 60kDa protein 1 (chaperonin) pseudogene 4; heat shock 60kDa protein 1 (chaperonin)	HSPD1
heat shock 70kDa protein 1A; heat shock 70kDa protein 1B	HSPA1B
heat shock 70kDa protein 2	HSPA2
heat shock 70kDa protein 9 (mortalin)	HSPA9
hexokinase 1	HK1
hexokinase 2 pseudogene; hexokinase 2	HK2
histidine triad nucleotide binding protein 2	HINT2
histidyl-tRNA synthetase 2, mitochondrial (putative); D-tyrosyl-tRNA deacylase 1 homolog (S. cerevisiae)	HARS2
holocytochrome c synthase (cytochrome c heme-lyase)	HCCS
HtrA serine peptidase 2	HTRA2
hydroxyacyl-Coenzyme A dehydrogenase	HADH
hydroxyacyl-Coenzyme A dehydrogenase/3-ketoacyl-Coenzyme A thiolase/enoyl-Coenzyme A hydratase (trifunctional protein), alpha subunit	HADHA
hydroxyacyl-Coenzyme A dehydrogenase/3-ketoacyl-Coenzyme A thiolase/enoyl-Coenzyme A hydratase (trifunctional protein), beta subunit	HADHB
hydroxyacylglutathione hydrolase	HAGH
hydroxysteroid (17-beta) dehydrogenase 10	HSD17B10
hydroxysteroid (17-beta) dehydrogenase 4	HSD17B4
hydroxysteroid (17-beta) dehydrogenase 8	HSD17B8
hydroxysteroid dehydrogenase like 2	HSDL2
hypothetical gene supported by AF044957; NM_004547; NADH dehydrogenase (ubiquinone) 1 beta subcomplex, 4, 15kDa	NDUFB4
hypothetical LOC648603; acetyl-Coenzyme A acyltransferase 2	ACAA2
inner membrane protein, mitochondrial (mitofilin)	IMMT
interleukin enhancer binding factor 3, 90kDa	ILF3
isochorismatase domain containing 2	ISOC2
isocitrate dehydrogenase 2 (NADP+), mitochondrial	IDH2
isocitrate dehydrogenase 3 (NAD+) alpha	IDH3A
isocitrate dehydrogenase 3 (NAD+) beta	IDH3B
isocitrate dehydrogenase 3 (NAD+) gamma	IDH3G
isoleucyl-tRNA synthetase 2, mitochondrial	IARS2
isovaleryl Coenzyme A dehydrogenase	IVD
KIAA0391	KIAA0391
L-2-hydroxyglutarate dehydrogenase	L2HGDH
lactamase, beta	LACTB
leucine aminopeptidase 3	LAP3
leucine rich repeat containing 59	LRRC59
leucine zipper-EF-hand containing transmembrane protein 1	LETM1
leucine-rich PPR-motif containing	LRPPRC
leucyl-tRNA synthetase 2, mitochondrial	LARS2
lon peptidase 1, mitochondrial	LONP1
lysyl-tRNA synthetase	KARS
malate dehydrogenase 2, NAD (mitochondrial)	MDH2
malic enzyme 2, NAD(+)-dependent, mitochondrial	ME2
malonyl CoA:ACP acyltransferase (mitochondrial)	MCAT
malonyl-CoA decarboxylase	MLYCD
metaxin 1	MTX1
metaxin 2	MTX2
metaxin 3	MTX3
methionyl-tRNA synthetase 2, mitochondrial	MARS2
methylcrotonoyl-Coenzyme A carboxylase 1 (alpha)	MCCC1
methylcrotonoyl-Coenzyme A carboxylase 2 (beta)	MCCC2
methylenetetrahydrofolate dehydrogenase (NADP+ dependent) 1, methenyltetrahydrofolate cyclohydrolase, formyltetrahydrofolate synthetase	MTHFD1
methylenetetrahydrofolate dehydrogenase (NADP+ dependent) 1-like	MTHFD1L
methylenetetrahydrofolate dehydrogenase (NADP+ dependent) 2, methenyltetrahydrofolate cyclohydrolase	MTHFD2
methylmalonic aciduria (cobalamin deficiency) cblA type	MMAA
methylmalonic aciduria (cobalamin deficiency) cblB type	MMAB
methylmalonyl Coenzyme A mutase	MUT
mitochondrial antiviral signaling protein	MAVS
mitochondrial carrier homolog 1 (C. elegans)	MTCH1
mitochondrial carrier homolog 2 (C. elegans)	MTCH2
mitochondrial fission factor	MFF
mitochondrial intermediate peptidase	MIPEP
mitochondrial poly(A) polymerase	MTPAP
mitochondrial ribosomal protein L30	MRPL30
mitochondrial ribosomal protein S11	MRPS11
mitochondrial ribosome recycling factor	MRRF
mitochondrial trans-2-enoyl-CoA reductase	MECR
mitochondrial translation optimization 1 homolog (S. cerevisiae)	MTO1
mitochondrial translational initiation factor 2	MTIF2
mitochondrial translational release factor 1-like	MTRF1L
mitofusin 2	MFN2
MpV17 mitochondrial inner membrane protein	MPV17
MRS2 magnesium homeostasis factor homolog (S. cerevisiae)	MRS2
NADH dehydrogenase (ubiquinone) 1 alpha subcomplex, 10, 42kDa	NDUFA10
NADH dehydrogenase (ubiquinone) 1 alpha subcomplex, 12	NDUFA12
NADH dehydrogenase (ubiquinone) 1 alpha subcomplex, 13	NDUFA13
NADH dehydrogenase (ubiquinone) 1 alpha subcomplex, 2, 8kDa	NDUFA2
NADH dehydrogenase (ubiquinone) 1 alpha subcomplex, 3, 9kDa	NDUFA3
NADH dehydrogenase (ubiquinone) 1 alpha subcomplex, 4, 9kDa	NDUFA4
NADH dehydrogenase (ubiquinone) 1 alpha subcomplex, 5, 13kDa	NDUFA5
NADH dehydrogenase (ubiquinone) 1 alpha subcomplex, 6, 14kDa	NDUFA6
NADH dehydrogenase (ubiquinone) 1 alpha subcomplex, 7, 14.5kDa	NDUFA7
NADH dehydrogenase (ubiquinone) 1 alpha subcomplex, 8, 19kDa	NDUFA8
NADH dehydrogenase (ubiquinone) 1 alpha subcomplex, 9, 39kDa	NDUFA9
NADH dehydrogenase (ubiquinone) 1 alpha subcomplex, assembly factor 1	NDUFAF1
NADH dehydrogenase (ubiquinone) 1 alpha subcomplex, assembly factor 2	NDUFAF2
NADH dehydrogenase (ubiquinone) 1 alpha subcomplex, assembly factor 3	NDUFAF3
NADH dehydrogenase (ubiquinone) 1 alpha subcomplex, assembly factor 4; similar to HSPC125	NDUFAF4
NADH dehydrogenase (ubiquinone) 1 beta subcomplex, 10, 22kDa	NDUFB10
NADH dehydrogenase (ubiquinone) 1 beta subcomplex, 11, 17.3kDa	NDUFB11
NADH dehydrogenase (ubiquinone) 1 beta subcomplex, 2, 8kDa	NDUFB2
NADH dehydrogenase (ubiquinone) 1 beta subcomplex, 3, 12kDa	NDUFB3
NADH dehydrogenase (ubiquinone) 1 beta subcomplex, 5, 16kDa	NDUFB5
NADH dehydrogenase (ubiquinone) 1 beta subcomplex, 6, 17kDa	NDUFB6
NADH dehydrogenase (ubiquinone) 1 beta subcomplex, 7, 18kDa	NDUFB7
NADH dehydrogenase (ubiquinone) 1 beta subcomplex, 8, 19kDa	NDUFB8
NADH dehydrogenase (ubiquinone) 1 beta subcomplex, 9, 22kDa	NDUFB9
NADH dehydrogenase (ubiquinone) 1, alpha/beta subcomplex, 1, 8kDa	NDUFAB1
NADH dehydrogenase (ubiquinone) 1, subcomplex unknown, 1, 6kDa	NDUFC1
NADH dehydrogenase (ubiquinone) 1, subcomplex unknown, 2, 14.5kDa	NDUFC2
NADH dehydrogenase (ubiquinone) Fe-S protein 1, 75kDa (NADH-coenzyme Q reductase)	NDUFS1
NADH dehydrogenase (ubiquinone) Fe-S protein 2, 49kDa (NADH-coenzyme Q reductase)	NDUFS2
NADH dehydrogenase (ubiquinone) Fe-S protein 3, 30kDa (NADH-coenzyme Q reductase)	NDUFS3
NADH dehydrogenase (ubiquinone) Fe-S protein 4, 18kDa (NADH-coenzyme Q reductase)	NDUFS4
NADH dehydrogenase (ubiquinone) Fe-S protein 6, 13kDa (NADH-coenzyme Q reductase)	NDUFS6
NADH dehydrogenase (ubiquinone) Fe-S protein 7, 20kDa (NADH-coenzyme Q reductase)	NDUFS7
NADH dehydrogenase (ubiquinone) Fe-S protein 8, 23kDa (NADH-coenzyme Q reductase)	NDUFS8
NADH dehydrogenase (ubiquinone) flavoprotein 1, 51kDa	NDUFV1
NADH dehydrogenase (ubiquinone) flavoprotein 2, 24kDa	NDUFV2
NADH dehydrogenase (ubiquinone) flavoprotein 3, 10kDa	NDUFV3
neurolysin (metallopeptidase M3 family)	NLN
NFS1 nitrogen fixation 1 homolog (S. cerevisiae)	NFS1
nicotinamide nucleotide transhydrogenase	NNT
NIMA (never in mitosis gene a)- related kinase 9	NEK9
nipsnap homolog 1 (C. elegans)	NIPSNAP1
non-metastatic cells 4, protein expressed in	NME4
nudix (nucleoside diphosphate linked moiety X)-type motif 19	NUDT19
optic atrophy 1 (autosomal dominant)	OPA1
optic atrophy 3 (autosomal recessive, with chorea and spastic paraplegia)	OPA3
ornithine aminotransferase (gyrate atrophy)	OAT
oxidase (cytochrome c) assembly 1-like	OXA1L
oxoglutarate (alpha-ketoglutarate) dehydrogenase (lipoamide)	OGDH
Parkinson disease (autosomal recessive, early onset) 7	PARK7
paroxysmal nonkinesigenic dyskinesia	PNKD
Pentatricopeptide repeat domain 3	PTCD3
peptidase (mitochondrial processing) alpha	PMPCA
peptidase (mitochondrial processing) beta	PMPCB
peptide deformylase (mitochondrial); component of oligomeric golgi complex 8	COG8
peptidylprolyl isomerase F	PPIF
peptidyl-tRNA hydrolase 2	PTRH2
peroxiredoxin 1	PRDX1
peroxiredoxin 3	PRDX3
peroxiredoxin 4	PRDX4
peroxiredoxin 5	PRDX5
phenylalanyl-tRNA synthetase 2, mitochondrial	FARS2
phosphatidylglycerophosphate synthase 1	PGS1
phosphoenolpyruvate carboxykinase 2 (mitochondrial)	PCK2
pitrilysin metallopeptidase 1	PITRM1
polymerase (DNA directed), gamma	POLG
polymerase (DNA directed), gamma 2, accessory subunit	POLG2
polymerase (DNA-directed), delta interacting protein 2	POLDIP2
polymerase (RNA) mitochondrial (DNA directed)	POLRMT
polyribonucleotide nucleotidyltransferase 1	PNPT1
presenilin associated, rhomboid-like	PARL
prohibitin	PHB
prohibitin 2	PHB2
prolyl 4-hydroxylase, alpha polypeptide I	P4HA1
propionyl Coenzyme A carboxylase, beta polypeptide	PCCB
prosaposin	PSAP
prostaglandin E synthase 2	PTGES2
protein interacting with PRKCA 1	PICK1
protein kinase, cAMP-dependent, catalytic, alpha	PRKACA
protein phosphatase 1, catalytic subunit, gamma isoform	PPP1CC
protein phosphatase 2 (formerly 2A), regulatory subunit A, alpha isoform	PPP2R1A
protein phosphatase 3 (formerly 2B), catalytic subunit, alpha isoform	PPP3CA
protein tyrosine phosphatase, mitochondrial 1	PTPMT1
protein tyrosine phosphatase, non-receptor type 11; similar to protein tyrosine phosphatase, non-receptor type 11	PTPN11
protoporphyrinogen oxidase	PPOX
pyrophosphatase (inorganic) 2	PPA2
pyrroline-5-carboxylate reductase 1	PYCR1
pyruvate carboxylase	PC
pyruvate dehydrogenase (lipoamide) alpha 1	PDHA1
pyruvate dehydrogenase (lipoamide) beta	PDHB
pyruvate dehydrogenase complex, component X	PDHX
pyruvate dehydrogenase kinase, isozyme 1	PDK1
pyruvate dehydrogenase kinase, isozyme 2	PDK2
pyruvate dehydrogenase kinase, isozyme 3	PDK3
pyruvate dehydrogenase phosphatase regulatory subunit	PDPR
pyruvate dehyrogenase phosphatase catalytic subunit 1	PDP1
radical S-adenosyl methionine domain containing 1	RSAD1
ras homolog gene family, member T1	RHOT1
ras homolog gene family, member T2	RHOT2
receptor (TNFRSF)-interacting serine-threonine kinase 1	RIPK1
reticulon 4 interacting protein 1	RTN4IP1
retinoic acid induced 14	RAI14
SCO cytochrome oxidase deficient homolog 1 (yeast)	SCO1
SCO cytochrome oxidase deficient homolog 2 (yeast)	SCO2
serine hydroxymethyltransferase 2 (mitochondrial)	SHMT2
seryl-tRNA synthetase 2, mitochondrial	SARS2
SHC (Src homology 2 domain containing) transforming protein 1	SHC1
sideroflexin 1	SFXN1
sideroflexin 2	SFXN2
sideroflexin 3	SFXN3
sideroflexin 4	SFXN4
similar to 14-3-3 protein epsilon (14-3-3E) (Mitochondrial import stimulation factor L subunit) (MSF L); tyrosine 3-monooxygenase/tryptophan 5-monooxygenase activation protein, epsilon polypeptide	YWHAE
similar to 26S protease regulatory subunit 6B (MIP224) (MB67-interacting protein) (TAT-binding protein 7) (TBP-7); proteasome (prosome, macropain) 26S subunit, ATPase, 4	PSMC4
similar to ATP-binding cassette, sub-family E, member 1; ATP-binding cassette, sub-family E (OABP), member 1	ABCE1
similar to NADH dehydrogenase (ubiquinone) Fe-S protein 5, 15kDa (NADH-coenzyme Q reductase); NADH dehydrogenase (ubiquinone) Fe-S protein 5, 15kDa (NADH-coenzyme Q reductase)	NDUFS5
similar to sucb; succinate-CoA ligase, GDP-forming, beta subunit	SUCLG2
similar to succinate dehydrogenase complex, subunit D, integral membrane protein; succinate dehydrogenase complex, subunit D, integral membrane protein	SDHD
similar to translocase of inner mitochondrial membrane 23 (yeast) homolog	TIMM23
similar to translocase of inner mitochondrial membrane 8 homolog B; translocase of inner mitochondrial membrane 8 homolog B (yeast)	TIMM8B
similar to translocase of outer mitochondrial membrane 20 homolog; similar to mitochondrial outer membrane protein 19; translocase of outer mitochondrial membrane 20 homolog (yeast)	TOMM20
similar to translocase of the inner mitochondrial membrane 14; DnaJ (Hsp40) homolog, subfamily C, member 19	DNAJC19
similar to ubiquinol-cytochrome c reductase binding protein; ubiquinol-cytochrome c reductase binding protein pseudogene; ubiquinol-cytochrome c reductase binding protein	UQCRB
single-stranded DNA binding protein 1	SSBP1
solute carrier family 1 (glial high affinity glutamate transporter), member 3	SLC1A3
solute carrier family 25 (mitochondrial carrier, Aralar), member 12	SLC25A12
solute carrier family 25 (mitochondrial carrier: glutamate), member 22	SLC25A22
solute carrier family 25 (mitochondrial carrier; adenine nucleotide translocator), member 4	SLC25A4
solute carrier family 25 (mitochondrial carrier; adenine nucleotide translocator), member 5; solute carrier family 25 (mitochondrial carrier; adenine nucleotide translocator), member 5 pseudogene 8	SLC25A5
solute carrier family 25 (mitochondrial carrier; adenine nucleotide translocator), member 6	SLC25A6
solute carrier family 25 (mitochondrial carrier; citrate transporter), member 1	SLC25A1
solute carrier family 25 (mitochondrial carrier; dicarboxylate transporter), member 10	SLC25A10
solute carrier family 25 (mitochondrial carrier; oxoglutarate carrier), member 11	SLC25A11
solute carrier family 25 (mitochondrial carrier; phosphate carrier), member 24	SLC25A24
solute carrier family 25 (mitochondrial carrier; phosphate carrier), member 25	SLC25A25
solute carrier family 25 (mitochondrial carrier; phosphate carrier), member 3	SLC25A3
solute carrier family 25 (mitochondrial oxodicarboxylate carrier), member 21	SLC25A21
solute carrier family 25, member 13 (citrin)	SLC25A13
solute carrier family 25, member 26	SLC25A26
solute carrier family 25, member 36	SLC25A36
sorting and assembly machinery component 50 homolog (S. cerevisiae)	SAMM50
spastic paraplegia 7 (pure and complicated autosomal recessive)	SPG7
spermatogenesis associated 5	SPATA5
spinster homolog 1 (Drosophila)	SPNS1
sterile alpha and TIR motif containing 1	SARM1
stomatin (EPB72)-like 2	STOML2
succinate dehydrogenase complex, subunit A, flavoprotein (Fp)	SDHA
succinate dehydrogenase complex, subunit B, iron sulfur (Ip)	SDHB
succinate dehydrogenase complex, subunit C, integral membrane protein, 15kDa	SDHC
succinate-CoA ligase, ADP-forming, beta subunit	SUCLA2
succinate-CoA ligase, alpha subunit	SUCLG1
superoxide dismutase 2, mitochondrial	SOD2
suppressor of var1, 3-like 1 (S. cerevisiae)	SUPV3L1
syntaxin binding protein 1	STXBP1
TBC1 domain family, member 15	TBC1D15
thioredoxin	TXN
thioredoxin reductase 2	TXNRD2
thiosulfate sulfurtransferase (rhodanese)	TST
threonyl-tRNA synthetase 2, mitochondrial (putative)	TARS2
TNF receptor-associated protein 1	TRAP1
transcription factor A, mitochondrial	TFAM
transcription factor B1, mitochondrial	TFB1M
transcription factor B2, mitochondrial	TFB2M
transferrin receptor (p90, CD71)	TFRC
translocase of inner mitochondrial membrane 10 homolog (yeast)	TIMM10
translocase of inner mitochondrial membrane 13 homolog (yeast)	TIMM13
translocase of inner mitochondrial membrane 17 homolog B (yeast)	TIMM17B
translocase of inner mitochondrial membrane 22 homolog (yeast)	TIMM22
translocase of inner mitochondrial membrane 44 homolog (yeast)	TIMM44
translocase of inner mitochondrial membrane 50 homolog (S. cerevisiae)	TIMM50
translocase of inner mitochondrial membrane 8 homolog A (yeast)	TIMM8A
translocase of inner mitochondrial membrane 9 homolog (yeast)	TIMM9
translocase of outer mitochondrial membrane 22 homolog (yeast)	TOMM22
translocase of outer mitochondrial membrane 40 homolog (yeast)	TOMM40
translocase of outer mitochondrial membrane 5 homolog (yeast)	TOMM5
translocase of outer mitochondrial membrane 6 homolog (yeast)	TOMM6
translocase of outer mitochondrial membrane 7 homolog (yeast)	TOMM7
translocase of outer mitochondrial membrane 70 homolog A (S. cerevisiae)	TOMM70A
transmembrane protein 70	TMEM70
tRNA 5-methylaminomethyl-2-thiouridylate methyltransferase	TRMU
tRNA nucleotidyl transferase, CCA-adding, 1	TRNT1
tryptophanyl tRNA synthetase 2, mitochondrial	WARS2
Ts translation elongation factor, mitochondrial	TSFM
Tu translation elongation factor, mitochondrial	TUFM
tumor protein p53	TP53
tyrosine 3-monooxygenase/tryptophan 5-monooxygenase activation protein, zeta polypeptide	YWHAZ
tyrosyl-tRNA synthetase 2, mitochondrial	YARS2
ubiquinol-cytochrome c reductase complex (7.2 kD)	UQCR10
ubiquinol-cytochrome c reductase core protein I	UQCRC1
ubiquinol-cytochrome c reductase core protein II	UQCRC2
ubiquinol-cytochrome c reductase hinge protein-like; ubiquinol-cytochrome c reductase hinge protein	UQCRH
ubiquinol-cytochrome c reductase, 6.4kDa subunit	UQCR11
ubiquinol-cytochrome c reductase, complex III subunit VII, 9.5kDa	UQCRQ
ubiquinol-cytochrome c reductase, Rieske iron-sulfur polypeptide-like 1; ubiquinol-cytochrome c reductase, Rieske iron-sulfur polypeptide 1	UQCRFS1
up-regulated during skeletal muscle growth 5 homolog (mouse)	USMG5
valyl-tRNA synthetase	VARS
valyl-tRNA synthetase 2, mitochondrial (putative)	VARS2
voltage-dependent anion channel 1; similar to voltage-dependent anion channel 1	VDAC1
voltage-dependent anion channel 2	VDAC2
voltage-dependent anion channel 3	VDAC3
v-raf murine sarcoma 3611 viral oncogene homolog	ARAF
v-raf-1 murine leukemia viral oncogene homolog 1	RAF1
v-yes-1 Yamaguchi sarcoma viral related oncogene homolog	LYN
WAS protein family, member 1	WASF1
X-prolyl aminopeptidase (aminopeptidase P) 3, putative	XPNPEP3
YME1-like 1 (S. cerevisiae)	YME1L1
zinc finger with KRAB and SCAN domains 1	ZKSCAN1

## Sheet: GO Cellular component
Term	Protein Count	%	P-Value	FDR	Genes
GO:0005739~mitochondrion	448	18.5815	1.78883e-103	2.71034e-100	HCCS, PDP1, OXA1L, STOML2, MPV17, OGDH, ACBD3, PDHA1, DHX30, ACAA2, OPA3, PDPR, BSG, OPA1, MTPAP, BCL2L13, SARS2, NME4, ABAT, YME1L1, ATPIF1, HSD17B10, ACADSB, MTX3, MTX2, MTX1, CHCHD3, WARS2, CHCHD4, HSPA1B, MTIF2, HADHA, HADHB, ARG2, DIABLO, ALDH4A1, FH, GPD2, PHB, GARS, DLAT, VDAC2, VDAC3, VDAC1, MLYCD, FOXRED1, GK, SPNS1, BCKDK, QARS, AUH, MTHFD1, MTHFD2, P4HA1, DHTKD1, NDUFB11, NDUFB10, LYN,…
GO:0044429~mitochondrial part	307	12.7333	5.41669e-99	8.20707e-96	HCCS, PDP1, OXA1L, TARS2, MPV17, STOML2, IARS2, OGDH, GOT2, HTRA2, ABCB10, PDHA1, DHX30, PDPR, ACAA2, OPA1, POLG, SUCLG2, SUCLG1, SARS2, NME4, LETM1, NNT, DLD, ATP5C1, ABAT, ATPIF1, MDH2, HSD17B10, ACADSB, MTX3, FDX1, MTX2, FARS2, MTX1, CHCHD3, WARS2, SFXN1, SFXN2, CHCHD4, ACAT1, HADHA, HADHB, ALDH4A1, SUPV3L1, FH, GPD2, GCDH, RARS2, PHB, FDXR, GARS, DLAT, VDAC2, AFG3L2, VDAC3, VDAC1, POLRMT, CKM…
GO:0031967~organelle envelope	290	12.0282	4.76748e-80	7.22342e-77	HCCS, OXA1L, LEMD2, MPV17, STOML2, LEMD3, RANGAP1, OGDH, GOT2, HTRA2, ABCB10, ACAA2, OPA1, POLG, RAN, SUCLG1, NME4, NPC1, LETM1, NNT, AAAS, ATP5C1, ATPIF1, MDH2, HSD17B10, LMNB1, LMNB2, MTX3, MTX2, MTX1, CHCHD3, SFXN1, SFXN2, CHCHD4, ACAT1, HADHA, HADHB, NUP50, EMD, GPD2, GCDH, PHB, SCD, FDXR, SMAD3, NXF1, VDAC2, AFG3L2, VDAC3, VDAC1, CKMT1A, NUP62, NIPSNAP1, PCNA, COX6A1, GK, SPNS1, PARP1, RTN4,…
GO:0031975~envelope	290	12.0282	1.23632e-79	1.8732e-76	HCCS, OXA1L, LEMD2, MPV17, STOML2, LEMD3, RANGAP1, OGDH, GOT2, HTRA2, ABCB10, ACAA2, OPA1, POLG, RAN, SUCLG1, NME4, NPC1, LETM1, NNT, AAAS, ATP5C1, ATPIF1, MDH2, HSD17B10, LMNB1, LMNB2, MTX3, MTX2, MTX1, CHCHD3, SFXN1, SFXN2, CHCHD4, ACAT1, HADHA, HADHB, NUP50, EMD, GPD2, GCDH, PHB, SCD, FDXR, SMAD3, NXF1, VDAC2, AFG3L2, VDAC3, VDAC1, CKMT1A, NUP62, NIPSNAP1, PCNA, COX6A1, GK, SPNS1, PARP1, RTN4,…
GO:0005740~mitochondrial envelope	221	9.16632	1.51825e-72	2.30037e-69	HCCS, OXA1L, MPV17, STOML2, OGDH, GOT2, HTRA2, ABCB10, ACAA2, OPA1, POLG, SUCLG1, NME4, LETM1, NNT, ATP5C1, ATPIF1, MDH2, HSD17B10, MTX3, MTX2, MTX1, CHCHD3, SFXN1, CHCHD4, SFXN2, ACAT1, HADHA, HADHB, GPD2, GCDH, PHB, FDXR, AFG3L2, VDAC2, VDAC3, VDAC1, CKMT1A, NIPSNAP1, COX6A1, GK, SPNS1, ATP5D, COX11, ABCF2, ATP5B, WASF1, TIMM17B, CDS2, PARL, MCCC1, DNAJC11, SLC25A3, ATP5L, ATP5O, SLC25A1, ATP5I…
GO:0031090~organelle membrane	397	16.4662	8.21462e-71	1.24463e-67	HCCS, OXA1L, MPV17, RP9, STOML2, OGDH, SSR1, B2M, VPS4B, VPS4A, ACAA2, BSG, OPA1, NME4, ATPIF1, ARL8B, HSD17B10, MTX3, CYP51A1, MTX2, MTX1, CHCHD3, RER1, HADHA, HADHB, GPD2, PHB, VDAC2, VDAC3, VDAC1, PCNA, GK, SPNS1, RTN4, AP2S1, COPB2, TMEM109, COPB1, STX5, NDUFB11, NDUFB10, LYN, ERLIN2, NDUFA13, ERLIN1, NDUFA10, NDUFA12, GNAS, SRP9, ALDH18A1, GK2, HK2, GPAA1, HK1, MTMR2, FMO5, ACSL1, DHCR7, MPD…
GO:0031966~mitochondrial membrane	210	8.71008	6.79938e-70	1.0302e-66	HCCS, OXA1L, MPV17, STOML2, OGDH, GOT2, ABCB10, ACAA2, OPA1, POLG, SUCLG1, NME4, LETM1, NNT, ATP5C1, ATPIF1, MDH2, HSD17B10, MTX3, MTX2, MTX1, CHCHD3, SFXN1, SFXN2, ACAT1, HADHA, HADHB, GPD2, GCDH, PHB, FDXR, AFG3L2, VDAC2, VDAC3, VDAC1, CKMT1A, NIPSNAP1, COX6A1, GK, SPNS1, ATP5D, COX11, ATP5B, WASF1, TIMM17B, CDS2, PARL, MCCC1, DNAJC11, SLC25A3, ATP5L, ATP5O, SLC25A1, ATP5I, ATP5H, DNAJC19, ATP5…
GO:0019866~organelle inner membrane	186	7.71464	3.38971e-67	5.1359e-64	HCCS, GRPEL2, OXA1L, NDUFAB1, LEMD2, MPV17, STOML2, LEMD3, COX5A, COX5B, GOT2, SLC25A21, FAHD1, UQCR10, UQCR11, SLC25A25, SLC25A24, TIMM9, SLC25A22, ABCB10, SLC25A26, HADH, ACAA2, FECH, OPA1, POLG, SUCLG1, TIMM8B, CLPX, TIMM8A, COX6C, NME4, LETM1, NNT, SLC25A36, ATP5C1, ATPIF1, LRPPRC, MDH2, HSD17B10, LMNB1, LMNB2, MTX1, CHCHD3, COX7C, SFXN1, SFXN2, ACAT1, HADHA, HADHB, MRS2, MTCH2, GSTK1, MTCH1,…
GO:0005743~mitochondrial inner membrane	174	7.21692	2.7517e-63	4.16922e-60	HCCS, GRPEL2, OXA1L, NDUFAB1, MPV17, STOML2, COX5A, COX5B, GOT2, FAHD1, SLC25A21, UQCR10, UQCR11, SLC25A25, SLC25A24, TIMM9, SLC25A22, ABCB10, SLC25A26, HADH, ACAA2, FECH, OPA1, POLG, SUCLG1, TIMM8B, CLPX, TIMM8A, COX6C, NME4, LETM1, NNT, SLC25A36, ATP5C1, ATPIF1, MDH2, HSD17B10, MTX1, CHCHD3, COX7C, SFXN1, SFXN2, ACAT1, HADHA, HADHB, MRS2, MTCH2, GSTK1, MTCH1, DHODH, GPD2, GCDH, PHB, FDXR, AK2, …
GO:0031974~membrane-enclosed lumen	518	21.4849	6.02075e-51	9.1223e-48	XRCC5, PDP1, MEF2C, XRCC6, SYNCRIP, XRCC1, OGDH, CTNNB1, INTS7, MED26, GIT2, PDHA1, DHX30, CCNA2, LUC7L3, KRR1, PDPR, OPA1, PTBP1, LIG3, SKP1, TOX4, SARS2, NME4, PPP1CA, RCC2, MED17, NLE1, ABAT, FLII, MYBBP1A, RAD23B, ACADSB, MYEF2, WARS2, CHCHD4, SERPINH1, HADHA, HADHB, ALDH4A1, TCF3, FH, DHX9, PHB, GARS, DLAT, NXF1, VDAC2, ATM, FXR1, VDAC1, NOLC1, PCNA, PARP1, NKAP, BCKDK, CRNKL1, PDIA3, TSG101…
GO:0070013~intracellular organelle lumen	495	20.5309	6.58964e-48	9.98426e-45	XRCC5, PDP1, MEF2C, XRCC6, SYNCRIP, XRCC1, OGDH, CTNNB1, INTS7, MED26, GIT2, PDHA1, DHX30, CCNA2, LUC7L3, KRR1, PDPR, PTBP1, LIG3, SKP1, TOX4, SARS2, PPP1CA, RCC2, MED17, NLE1, ABAT, FLII, MYBBP1A, RAD23B, ACADSB, MYEF2, WARS2, SERPINH1, HADHA, HADHB, ALDH4A1, TCF3, FH, DHX9, PHB, GARS, DLAT, NXF1, VDAC2, ATM, FXR1, VDAC1, NOLC1, PCNA, PARP1, NKAP, BCKDK, CRNKL1, PDIA3, TSG101, TCOF1, PDIA6, PDIA…
GO:0043233~organelle lumen	499	20.6968	2.69596e-46	4.08477e-43	XRCC5, PDP1, MEF2C, XRCC6, SYNCRIP, XRCC1, OGDH, CTNNB1, INTS7, MED26, GIT2, PDHA1, DHX30, CCNA2, LUC7L3, KRR1, PDPR, PTBP1, LIG3, SKP1, TOX4, SARS2, PPP1CA, RCC2, MED17, NLE1, ABAT, FLII, MYBBP1A, RAD23B, ACADSB, MYEF2, WARS2, SERPINH1, HADHA, HADHB, ALDH4A1, TCF3, FH, DHX9, PHB, GARS, DLAT, NXF1, VDAC2, ATM, FXR1, VDAC1, NOLC1, PCNA, PARP1, NKAP, BCKDK, CRNKL1, PDIA3, TSG101, TCOF1, PDIA6, PDIA…
GO:0031980~mitochondrial lumen	125	5.18457	2.91482e-43	4.41637e-40	PDP1, GRPEL2, GRPEL1, TARS2, NDUFAB1, IARS2, MIPEP, OGDH, PDHB, GOT2, DDX28, IDH3G, LRRC59, TFB2M, PDHA1, HADH, DHX30, PDPR, FECH, POLG, SUCLG2, SUCLG1, SARS2, CLPX, EARS2, DLD, CLPP, ATP5C1, ABAT, YARS2, TFB1M, PCCB, LRPPRC, MDH2, ACADSB, ME2, FDX1, GLUD1, FARS2, MRPS11, WARS2, ACAT1, HADHA, KARS, HADHB, MUT, IVD, GSTK1, HARS2, ALDH4A1, HSPE1, SUPV3L1, DNAJA3, FH, GCDH, RARS2, FDXR, AK3, GARS, I…
GO:0005759~mitochondrial matrix	125	5.18457	2.91482e-43	4.41637e-40	PDP1, GRPEL2, GRPEL1, TARS2, NDUFAB1, IARS2, MIPEP, OGDH, PDHB, GOT2, DDX28, IDH3G, LRRC59, TFB2M, PDHA1, HADH, DHX30, PDPR, FECH, POLG, SUCLG2, SUCLG1, SARS2, CLPX, EARS2, DLD, CLPP, ATP5C1, ABAT, YARS2, TFB1M, PCCB, LRPPRC, MDH2, ACADSB, ME2, FDX1, GLUD1, FARS2, MRPS11, WARS2, ACAT1, HADHA, KARS, HADHB, MUT, IVD, GSTK1, HARS2, ALDH4A1, HSPE1, SUPV3L1, DNAJA3, FH, GCDH, RARS2, FDXR, AK3, GARS, I…
GO:0044455~mitochondrial membrane part	86	3.56698	2.8921e-40	4.38195e-37	ATP5D, UQCRC2, OXA1L, UQCRC1, ATP5B, TIMM17B, NDUFAB1, PPOX, TIMM50, UQCRFS1, NDUFAF1, NDUFS7, NDUFS6, NDUFS5, NDUFS4, TIMM9, NDUFS8, ATP5L, ATP5O, NDUFS3, ATP5I, NDUFS2, ATP5H, NDUFS1, COX15, ATP5J, OPA1, NDUFB10, LYN, SLC25A6, NDUFC2, NDUFA13, TMEM70, NDUFC1, TIMM23, NDUFA10, TIMM44, TIMM8B, MFN2, NNT, UQCRH, TOMM20, ATP5C1, TOMM22, ATPIF1, UQCRB, NDUFB3, NDUFB4, NDUFB5, NDUFB6, NDUFB7, SAMM50,…
GO:0005829~cytosol	360	14.9316	5.60457e-31	8.49174e-28	XRCC4, RPL17, LDHA, PDLIM5, PGAM1, CCT2, CDC16, CCT3, CTNNB1, MAP3K7, COL4A3BP, VPS4B, STAM, ANAPC5, RAN, EIF2S3, SKP1, MYH9, DCTN1, RPTOR, DCTN2, JUP, PPP1CA, GAPVD1, NME3, EIF2S1, RARS, EIF2S2, PGM1, RAB14, HARS, TUBA4A, ADSL, ANAPC7, ADD1, HMGCS1, CALR, BANF1, CDC37, TPI1, RILPL1, RAC1, DIABLO, PABPC1, RPS24, NPLOC4, SPHK2, MAP2K2, PCNT, SMAD5, GARS, GGH, SMAD3, CDC23, EPRS, ALMS1, TKT, CDC20,…
GO:0070469~respiratory chain	55	2.28121	5.52774e-28	8.37533e-25	UQCRC2, OXA1L, UQCRC1, CYC1, NDUFAB1, UQCRFS1, UQCRQ, NDUFAF1, NDUFS7, NDUFS6, UQCR10, NDUFS5, UQCR11, NDUFS4, NDUFS8, NDUFS3, NDUFS2, NDUFS1, COX15, NDUFB11, NDUFB10, CYCS, NDUFC2, NDUFA13, NDUFC1, NDUFA10, NDUFA12, NNT, UQCRH, UQCRB, NDUFB3, NDUFB4, NDUFB5, NDUFB6, NDUFB7, NDUFB8, NDUFB9, COX7A2L, NDUFB2, NDUFA4, NDUFA5, NDUFA2, NDUFA3, COX7A2, NDUFA8, NDUFA9, NDUFA6, NDUFA7, BCS1L, SDHA, NDUFV…
GO:0005746~mitochondrial respiratory chain	47	1.9494	5.63681e-24	8.54058e-21	UQCRC2, NDUFB3, NDUFB4, OXA1L, NDUFB5, NDUFB6, UQCRC1, NDUFB7, NDUFB8, NDUFB9, NDUFAB1, COX7A2L, UQCRFS1, NDUFAF1, NDUFB2, NDUFS7, NDUFS6, NDUFS5, NDUFS4, NDUFS8, NDUFS3, NDUFS2, NDUFS1, COX15, NDUFA4, NDUFA5, NDUFA2, NDUFA3, COX7A2, NDUFB10, NDUFA8, NDUFA9, NDUFA6, NDUFA7, NDUFC2, NDUFA13, BCS1L, NDUFC1, NDUFA10, SDHA, NDUFV3, NNT, UQCRH, NDUFV1, NDUFV2, COX6A1, UQCRB
GO:0012505~endomembrane system	223	9.24927	5.88161e-22	8.91149e-19	SEC31A, VAPA, VAPB, LEMD2, LEMD3, RP9, RANGAP1, SSR1, B2M, PICALM, HTRA2, GBF1, COL4A3BP, RAB21, SGPL1, BSG, RAN, MGAT1, NPC1, AAAS, ATP2C1, RAB14, MGAT5, GLG1, TMX1, LMNB1, CYP51A1, LMNB2, RER1, SERINC1, NUP50, TMED10, STX10, EMD, NPLOC4, SCD, SMAD3, NXF1, NUP62, ATP2A2, PCNA, GOSR1, PARP1, RTN4, AP1B1, AP2S1, ACTR3, COPB2, AP2B1, TMEM109, COPB1, GOLGA5, GOLGA3, DHCR24, STX5, ERLIN2, ERLIN1, NUP…
GO:0042470~melanosome	53	2.19826	1.2411e-20	1.88045e-17	HSP90AB1, ATP1B3, PDIA3, RAB5B, RAB5C, NAP1L1, PDIA6, CNP, PDIA4, CLTC, PRDX1, CANX, SLC1A5, SND1, SLC2A1, RPN1, DNAJC5, BSG, HSP90AA1, RAN, FLOT1, ERP29, SLC3A2, RAB5A, CTSD, PDCD6IP, RAB7A, YWHAZ, GANAB, ATP6V1B2, ITGB1, CALU, ANXA6, TMEM33, RAC1, FASN, TMED10, SEC22B, HSPA5, HSPA8, RAB2A, P4HB, YWHAB, GGH, ATP1A1, YWHAE, ANXA2, HSP90B1, CCT4, TFRC, PPIB, RAB35, ANXA11
GO:0048770~pigment granule	53	2.19826	1.2411e-20	1.88045e-17	HSP90AB1, ATP1B3, PDIA3, RAB5B, RAB5C, NAP1L1, PDIA6, CNP, PDIA4, CLTC, PRDX1, CANX, SLC1A5, SND1, SLC2A1, RPN1, DNAJC5, BSG, HSP90AA1, RAN, FLOT1, ERP29, SLC3A2, RAB5A, CTSD, PDCD6IP, RAB7A, YWHAZ, GANAB, ATP6V1B2, ITGB1, CALU, ANXA6, TMEM33, RAC1, FASN, TMED10, SEC22B, HSPA5, HSPA8, RAB2A, P4HB, YWHAB, GGH, ATP1A1, YWHAE, ANXA2, HSP90B1, CCT4, TFRC, PPIB, RAB35, ANXA11
GO:0005783~endoplasmic reticulum	255	10.5765	1.85306e-20	2.80766e-17	CDIPT, HM13, SEC31A, VAPA, VAPB, SRP68, USE1, RP9, SYNCRIP, DNAJB12, RAB1A, SSR1, HTRA2, PLOD1, DNAJB11, PLOD2, COL4A3BP, PLOD3, SCD5, JAGN1, RAB21, AUP1, PLD3, SGPL1, LPCAT2, ERGIC1, ERGIC2, ERGIC3, NPC1, TXNDC5, MLEC, RAB14, SURF4, TPST2, ERMP1, TMX1, HSD17B10, CYP51A1, HSD17B12, TMX3, HSPA1B, CALR, SERPINH1, CALU, VRK2, LPCAT1, STX18, SERINC1, ZMPSTE24, EMD, NPLOC4, CLCC1, SCD, HYOU1, ATP2A2, …
GO:0005747~mitochondrial respiratory chain complex I	34	1.4102	1.33757e-19	2.02661e-16	NDUFB3, NDUFB4, NDUFB5, NDUFB6, NDUFB7, NDUFB8, NDUFB9, NDUFAB1, NDUFAF1, NDUFB2, NDUFS7, NDUFS6, NDUFS5, NDUFS4, NDUFS8, NDUFS3, NDUFS2, NDUFS1, NDUFA4, NDUFA5, NDUFA2, NDUFA3, NDUFB10, NDUFA8, NDUFA9, NDUFA6, NDUFA7, NDUFC2, NDUFA13, NDUFC1, NDUFA10, NDUFV3, NDUFV1, NDUFV2
GO:0045271~respiratory chain complex I	34	1.4102	1.33757e-19	2.02661e-16	NDUFB3, NDUFB4, NDUFB5, NDUFB6, NDUFB7, NDUFB8, NDUFB9, NDUFAB1, NDUFAF1, NDUFB2, NDUFS7, NDUFS6, NDUFS5, NDUFS4, NDUFS8, NDUFS3, NDUFS2, NDUFS1, NDUFA4, NDUFA5, NDUFA2, NDUFA3, NDUFB10, NDUFA8, NDUFA9, NDUFA6, NDUFA7, NDUFC2, NDUFA13, NDUFC1, NDUFA10, NDUFV3, NDUFV1, NDUFV2
GO:0030964~NADH dehydrogenase complex	34	1.4102	1.33757e-19	2.02661e-16	NDUFB3, NDUFB4, NDUFB5, NDUFB6, NDUFB7, NDUFB8, NDUFB9, NDUFAB1, NDUFAF1, NDUFB2, NDUFS7, NDUFS6, NDUFS5, NDUFS4, NDUFS8, NDUFS3, NDUFS2, NDUFS1, NDUFA4, NDUFA5, NDUFA2, NDUFA3, NDUFB10, NDUFA8, NDUFA9, NDUFA6, NDUFA7, NDUFC2, NDUFA13, NDUFC1, NDUFA10, NDUFV3, NDUFV1, NDUFV2
GO:0009295~nucleoid	27	1.11987	5.14578e-17	7.7966e-14	TUFM, ATP5B, HADHA, HADHB, TFAM, LONP1, DDX28, LRRC59, TFB2M, SUPV3L1, POLG2, DHX30, DNAJA3, HSPA9, SHMT2, SSBP1, SLC25A5, POLG, VDAC2, CLPX, VDAC1, ACADVL, DBT, POLRMT, POLDIP2, TFB1M, LRPPRC
GO:0042645~mitochondrial nucleoid	27	1.11987	5.14578e-17	7.7966e-14	TUFM, ATP5B, HADHA, HADHB, TFAM, LONP1, DDX28, LRRC59, TFB2M, SUPV3L1, POLG2, DHX30, DNAJA3, HSPA9, SHMT2, SSBP1, SLC25A5, POLG, VDAC2, CLPX, VDAC1, ACADVL, DBT, POLRMT, POLDIP2, TFB1M, LRPPRC
GO:0031981~nuclear lumen	337	13.9776	1.59663e-16	1.66533e-13	XRCC5, MEF2C, SRP68, XRCC6, S100A9, SYNCRIP, CCT2, PDLIM1, CDC16, XRCC1, CTNNB1, PRIM1, INTS7, MED26, PRIM2, U2AF1, GIT2, H2AFX, CCNA2, LUC7L3, KRR1, GTPBP4, ANAPC5, RAN, BYSL, PTBP1, LIG3, SKP1, TAF6L, TOX4, RFC5, RFC3, PPP1CA, RFC4, NOP2, RCC2, HUWE1, PIAS4, RFC1, PIAS3, RFC2, MED17, RARS, NLE1, FLII, ANAPC7, PIAS1, MYBBP1A, FUS, RAD23B, LMNB1, LMNB2, MRE11A, NOC3L, MYEF2, IGF2BP1, CHEK1, CHEK2…
GO:0043232~intracellular non-membrane-bounded organelle	539	22.3559	3.41884e-16	4.996e-13	XRCC5, HIST2H2AA3, KIFC1, RPL17, XRCC4, TUBB2B, PPP2R5A, TUBB2A, XRCC6, STOML2, H1FX, RANGAP1, CTNNB1, HIST1H2BM, ILK, DHX30, KRR1, KIF5B, MPDZ, PTBP1, MYH9, CTNNA1, TOX4, NCAPD3, NCAPD2, JUP, RCC2, NLE1, FLII, ARL8B, MYBBP1A, DNAH17, MYEF2, HADHA, HADHB, PFN1, CDC42EP1, CDC42EP4, RPS24, GIT1, DHX9, PCNT, NUF2, NDC80, HBA1, FXR2, VDAC2, SEPT10, SEPT11, ATM, FXR1, VDAC1, NOLC1, PKP2, PCNA, MAP4, M…
GO:0043228~non-membrane-bounded organelle	539	22.3559	3.41884e-16	4.996e-13	XRCC5, HIST2H2AA3, KIFC1, RPL17, XRCC4, TUBB2B, PPP2R5A, TUBB2A, XRCC6, STOML2, H1FX, RANGAP1, CTNNB1, HIST1H2BM, ILK, DHX30, KRR1, KIF5B, MPDZ, PTBP1, MYH9, CTNNA1, TOX4, NCAPD3, NCAPD2, JUP, RCC2, NLE1, FLII, ARL8B, MYBBP1A, DNAH17, MYEF2, HADHA, HADHB, PFN1, CDC42EP1, CDC42EP4, RPS24, GIT1, DHX9, PCNT, NUF2, NDC80, HBA1, FXR2, VDAC2, SEPT10, SEPT11, ATM, FXR1, VDAC1, NOLC1, PKP2, PCNA, MAP4, M…
GO:0009898~internal side of plasma membrane	104	4.31356	1.07733e-14	1.63203e-11	SEC31A, RAB9A, UTRN, RAB1B, EIF5A, RANGAP1, VPS33B, VPS33A, ACBD3, SHB, PACSIN3, ILK, RALB, RAB23, RRAS, RALA, STAM, AUP1, IRS4, CTNNA1, JUP, COPG2, RAB18, FNBP1L, RAB14, RAB13, RAB10, ADD3, ADD1, ARFGAP2, PALM, ARFGAP3, STAM2, COPZ1, SNX1, KRAS, DMD, RAC1, AP2M1, RAB8A, NCKAP1, RHEB, SPTBN1, GK, PTPN1, CYB5R3, COPA, CLTA, CLTB, RAB5B, AP1B1, PHKB, RAB5C, AP2S1, AP3S1, CLTC, CDC42, COPB2, AP2B1, …
GO:0044432~endoplasmic reticulum part	104	4.31356	7.63633e-12	1.15702e-08	RAB9A, VAPA, VAPB, UBQLN4, RP9, SSR1, TAPBP, APOA2, APOA1, DNAJB11, HTRA2, COL4A3BP, RPN1, RPN2, ASPH, DDOST, SGPL1, SPTLC1, SPTLC2, SLC33A1, ERP29, STIM1, BCAP31, SEC61B, TXNDC5, UGGT1, TMX1, DERL2, CYP51A1, LMAN1, CALR, SERPINH1, CALU, MIA3, CEPT1, KDELC2, SERINC1, SEC61A1, P4HB, NOMO3, SEC11A, HYOU1, PPIB, ATP2A2, SPCS3, SPCS1, SPCS2, NOMO1, CYB5R3, RTN4, PDIA3, CYP2S1, DNAJC10, PDIA6, PDIA5, …
GO:0005794~Golgi apparatus	206	8.54417	6.1413e-11	9.30495e-08	CDIPT, SEC31A, VAPB, RAB1B, PRKG1, RAB1A, HS2ST1, B2M, CUL3, ACBD3, PICALM, GBF1, COL4A3BP, RAB21, BSG, VPS45, LPCAT2, TOX4, ERGIC1, GLCE, ERGIC2, ERGIC3, MGAT1, MGAT2, ATP2C1, RAB14, RAB13, RAB10, MGAT5, GLG1, TPST2, GNAI3, ASAP2, RER1, MYEF2, ARF6, CALU, STX12, LPCAT1, STX18, GORASP2, STX16, TMED10, ZMPSTE24, STX10, CLCC1, TMEM115, ARF3, ARF4, GOSR1, CLCN5, IER3IP1, KIAA0368, AP1B1, AP3S1, CANT…
GO:0046930~pore complex	42	1.74202	8.89837e-11	1.34823e-07	XPO1, NUP98, EIF5A, NUP93, NUP188, RANGAP1, NUP214, CSE1L, DDX19A, NUP210, NUP50, RANBP2, TNPO1, KPNB1, LBR, XPOT, NUP153, MYO1C, RAN, IPO11, TOMM40, NUP85, IPO9, NXF1, IPO8, NUP155, VDAC2, VDAC3, VDAC1, AAAS, NUP62, IPO7, NUP205, BAX, IPO4, IPO5, KPNA6, SEC13, KPNA5, NUP107, KPNA2, KPNA1
GO:0005635~nuclear envelope	69	2.86188	1.59476e-10	2.41629e-07	RTN4, XPO1, LEMD2, LEMD3, EIF5A, NUP188, RANGAP1, TMEM109, RANBP2, KPNB1, LBR, MYO6, RAN, NUP85, IPO9, IPO8, NPC1, AAAS, IPO7, IGF2R, IPO4, NUP205, IPO5, NUCB2, KPNA6, KPNA5, NUP107, KPNA2, MATR3, LRPPRC, KPNA1, NUP98, MTDH, LMNB1, HAX1, LMNB2, NUP93, ANXA7, NUP214, CSE1L, DDX19A, NUP210, DHCR7, TOR1A, NUP50, MTMR6, EMD, TNPO1, XPOT, NUP153, MYO1C, SCD, IPO11, TRIM27, LMNA, SMAD3, CENPF, NXF1, SU…
GO:0005643~nuclear pore	37	1.53463	1.92968e-10	2.92374e-07	XPO1, NUP98, EIF5A, NUP93, NUP188, RANGAP1, NUP214, CSE1L, DDX19A, NUP210, NUP50, RANBP2, TNPO1, KPNB1, LBR, XPOT, NUP153, MYO1C, RAN, IPO11, NUP85, IPO9, IPO8, NXF1, NUP155, AAAS, NUP62, IPO7, NUP205, IPO4, IPO5, KPNA6, SEC13, KPNA5, NUP107, KPNA2, KPNA1
GO:0005681~spliceosome	51	2.1153	2.39184e-10	3.62398e-07	CRNKL1, SNRPD3, U2AF2, SNRPD1, SYNCRIP, SKIV2L2, SRRM2, U2AF1, DDX20, API5, PRPF31, EFTUD2, HNRNPA2B1, SF1, HNRNPR, HNRNPU, TTF2, SMN1, PRPF6, EIF4A3, SNRNP200, SNRPB, SNRPF, SNRPE, SF3B3, SF3B2, PRPF19, HNRNPA3, HNRNPM, SF3B1, HNRNPK, PRPF8, HNRNPF, DHX15, SNRNP70, PABPC1, HNRNPC, DDX41, GEMIN7, GEMIN5, RBM22, BCAS2, SNW1, DDX5, SF3A2, RBMX, HNRNPA1, SF3A3, RHEB, HNRNPH1, RBM17
GO:0005793~ER-Golgi intermediate compartment	25	1.03691	3.05528e-10	4.6292e-07	KIAA0368, PDIA6, LMAN2, LMAN1, SERPINH1, TMED5, TMED2, SEC22B, TMED10, HSPA5, KDELR1, GOLGA3, FN1, P4HB, MAN1A1, TMED9, ERGIC1, ERGIC2, NUCB1, ERP44, NUCB2, SURF4, UGGT1, SEC23B, GOLGB1
GO:0030529~ribonucleoprotein complex	134	5.55786	3.47505e-10	5.26521e-07	SRP14, RPL17, NAF1, XPO1, U2AF2, SNRPD3, LSM7, SRP68, SNRPD1, SYNCRIP, SRRM2, SND1, U2AF1, DDX20, API5, RPS27A, KRR1, ACTN4, EFTUD2, FMR1, HNRNPA2B1, PTBP1, EEF2, HNRNPR, HNRNPU, RSL1D1, PA2G4, EIF2S1, SNRPB, CELF1, SRP72, SNRPF, SNRPE, PABPC4, MRPS11, IGF2BP1, HSPA1B, CALR, HNRNPA3, HNRNPL, HNRNPM, MOV10, HNRNPK, HNRNPF, NPM1, HNRNPD, HNRNPC, PABPC1, DDX41, HNRNPAB, RPS24, DHX9, TBL3, SRP54, NOC…
GO:0005654~nucleoplasm	204	8.46122	5.44777e-10	8.25415e-07	MEF2C, XRCC5, XRCC6, SYNCRIP, PDLIM1, CDC16, XRCC1, CTNNB1, PRIM1, MED26, INTS7, PRIM2, U2AF1, GIT2, H2AFX, CCNA2, LUC7L3, ANAPC5, RAN, PTBP1, LIG3, SKP1, TAF6L, RFC5, RFC3, PPP1CA, RFC4, RFC1, RFC2, PIAS3, MED17, PIAS1, ANAPC7, RAD23B, MRE11A, NOC3L, CHEK1, CHEK2, ACD, NUP50, HOXA10, TCF3, SRP54, SUB1, PHB, MAML2, SMAD5, CDC23, SMAD3, CDC20, NXF1, HNRNPA1, ATM, SUPT16H, PCNA, PARP1, CHAF1B, CRNK…
GO:0005819~spindle	54	2.23973	5.77167e-10	8.74491e-07	KIF23, KIF22, KIFC1, SEPT2, PRC1, CDC14A, TTK, AURKA, AURKB, CDC16, FAM83D, TUBG1, KIF14, CDK1, ARHGEF2, KIF11, TPX2, NUP85, MYH9, DCTN1, RIF1, RCC2, HSPB1, HAUS8, ARL8B, SEPT7, HAUS3, PARD3, HAUS5, KATNB1, TUBGCP4, NUMA1, KATNA1, CEP170, NPM1, SKA3, CLASP1, CLASP2, EMD, CENPF, CDC20, MID1, RACGAP1, TUBGCP2, ATM, SMC3, NEDD1, PLK1, PTP4A1, ANXA11, CENPV, KIF20B, MYH10, CALM1
GO:0031968~organelle outer membrane	43	1.78349	6.52691e-10	9.88922e-07	MAVS, CYB5R3, SAMM50, GK2, MTX3, MTX2, WASF1, MTX1, HK2, HK1, FIS1, MFF, CISD1, TOMM7, ACSL1, TOMM6, TOMM5, DHCR7, ACSL4, EMD, ACSL3, DNM1L, OPA1, SLC25A4, TOMM40, RAF1, CYB5A, CYB5B, VDAC2, PPP1CC, VDAC3, VDAC1, MFN2, TOMM70A, BAX, NUCB2, RHOT1, TOMM20, RHOT2, TOMM22, GK, AKAP1, LRPPRC
GO:0042175~nuclear envelope-endoplasmic reticulum network	85	3.52551	8.12623e-10	1.23124e-06	CYB5R3, RTN4, XPO1, RAB9A, VAPA, VAPB, CYP2S1, UBQLN4, EIF5A, RP9, ALG6, TAPBP, SSR1, PIGK, HTRA2, COL4A3BP, RPN1, RPN2, ASPH, SEC24C, DDOST, DHCR24, SGPL1, SPTLC1, SPTLC2, SLC33A1, PIGU, STIM1, PIGT, ERLIN2, KTN1, ERLIN1, PIGS, SACM1L, BCAP31, MAGT1, SEC61B, NUCB2, RAB14, PPM1L, LRPPRC, SEC23B, SRP9, TMX1, FKBP8, DERL2, CYP51A1, SLC37A4, GPAA1, LMAN1, STT3B, FMO5, MIA3, CEPT1, STT3A, SERINC1, DH…
GO:0005741~mitochondrial outer membrane	39	1.61759	9.31352e-10	1.41113e-06	MAVS, CYB5R3, SAMM50, GK2, MTX3, MTX2, WASF1, MTX1, HK2, HK1, MFF, FIS1, CISD1, TOMM7, ACSL1, TOMM6, TOMM5, ACSL4, ACSL3, DNM1L, OPA1, SLC25A4, TOMM40, RAF1, CYB5A, CYB5B, VDAC2, PPP1CC, VDAC3, VDAC1, MFN2, TOMM70A, BAX, RHOT1, TOMM20, RHOT2, TOMM22, GK, AKAP1
GO:0030530~heterogeneous nuclear ribonucleoprotein complex	15	0.622148	1.79351e-09	2.71743e-06	PTBP1, HNRNPA2B1, RBMX, HNRNPA1, HNRNPR, HNRNPA0, HNRNPU, HNRNPL, HNRNPH3, HNRNPH2, HNRNPK, HNRNPUL1, HNRNPF, HNRNPD, HNRNPH1
GO:0016023~cytoplasmic membrane-bounded vesicle	138	5.72377	2.46162e-09	3.7297e-06	SEC31A, CADM1, ATP1B3, F13A1, CNP, VPS33B, APOA1, PICALM, PACSIN2, SND1, SLC2A1, RPN1, DNAJC5, RAB21, SCAMP1, BSG, MYO6, ACTN4, RAN, PICK1, ERP29, ACTN1, CORO7, COPG2, FNBP1L, DLD, RAB14, PDCD6IP, DST, RAB7A, PALM, GNAI3, COPZ1, ATP6V1B2, ITGB1, CALU, STX12, FGB, ALB, RAC1, SLC30A5, TMED10, TRAF7, FN1, AP2M1, P4HB, GGH, GOLIM4, GARS, ATM, LAMP2, CORO1A, CCT4, PPIB, YIPF5, HSPD1, HSP90AB1, COPA, C…
GO:0019867~outer membrane	43	1.78349	2.56218e-09	3.88207e-06	MAVS, CYB5R3, SAMM50, GK2, MTX3, MTX2, WASF1, MTX1, HK2, HK1, FIS1, MFF, CISD1, TOMM7, ACSL1, TOMM6, TOMM5, DHCR7, ACSL4, EMD, ACSL3, DNM1L, OPA1, SLC25A4, TOMM40, RAF1, CYB5A, CYB5B, VDAC2, PPP1CC, VDAC3, VDAC1, MFN2, TOMM70A, BAX, NUCB2, RHOT1, TOMM20, RHOT2, TOMM22, GK, AKAP1, LRPPRC
GO:0015629~actin cytoskeleton	80	3.31813	3.71154e-09	5.62352e-06	CTNNAL1, LIMA1, PDLIM7, GNA11, PDLIM5, WASF1, FERMT2, CAPZA1, UTRN, WASF2, IQGAP2, TTN, IQGAP1, ACTR3, ACTR2, PAK2, DYNLL2, ACTR1A, ILK, ACTR1B, ZYX, CAP1, TWF1, MYO6, ACTN4, MYH9, CTNNA1, SLC9A3R1, FLNB, FLNA, DCTN2, EPB41L2, JUP, CGN, CFL1, TRIM32, WASL, DST, SEPT7, DBN1, LCP1, DYNC1I2, SEPT9, ADD1, MYL6, ABLIM1, ALDOA, TRIOBP, HAX1, MYL3, CALD1, ARPC4, TPM1, LLGL1, TPM4, TPM3, PFN1, EZR, ARPC3…
GO:0044431~Golgi apparatus part	85	3.52551	5.03713e-09	7.63197e-06	COPA, CLTA, SEC31A, CLTB, RAB9A, AP1B1, KIAA0368, CHPF2, CLTC, TAPBP, B2M, TMF1, ACTR3, COPB2, GBF1, COPB1, SEC24C, GOLGA5, GOLGA3, RAB21, SEC23A, SCAMP1, ARL1, STX5, BSG, SCAMP3, STX4, SCAMP2, ADAM10, MAN1A2, HLA-A, PI4KA, CORO7, MAN1A1, LPCAT2, FLNA, BCAP31, MGAT1, MAN2A1, MGAT2, COPG2, ATP2C1, ARRB1, IGF2R, NUCB2, ARCN1, USO1, RAB14, GNAS, CPD, WASL, CUX1, MGAT5, SEC23B, COPE, GLG1, ARFGAP1, G…
GO:0005730~nucleolus	165	6.84363	6.09292e-09	9.23166e-06	XPO1, SEPT2, SNRPD3, S100A9, SRP68, CCT2, IQGAP1, CTNNBL1, IDH3G, PGRMC1, TARDBP, DDX21, GNL2, GNL3, KRR1, GTPBP4, ACTN4, MTA2, BYSL, GABPA, FMR1, HNRNPA2B1, PTBP1, ACTN1, TOX4, MRTO4, RSL1D1, PA2G4, NOP2, RCC2, HUWE1, RARS, SMARCA5, NLE1, FLII, MYBBP1A, XRN2, EP400, FUS, HMGB1, HMGB2, BLM, MRE11A, NOC3L, IGF2BP1, MYEF2, KEAP1, HNRNPA3, HNRNPM, VRK1, DDX47, HNRNPK, HNRNPF, NPM1, EIF3L, NOVA1, NKR…
GO:0031988~membrane-bounded vesicle	140	5.80672	6.39753e-09	9.69318e-06	SEC31A, CADM1, ATP1B3, F13A1, CNP, VPS33B, APOA1, PICALM, PACSIN2, SND1, SLC2A1, RPN1, DNAJC5, RAB21, SCAMP1, BSG, MYO6, ACTN4, RAN, PICK1, ERP29, ACTN1, CORO7, COPG2, FNBP1L, DLD, RAB14, PDCD6IP, DST, ALDOA, RAB7A, PALM, GNAI3, COPZ1, ATP6V1B2, ITGB1, CALU, STX12, FGB, ALB, RAC1, SLC30A5, TMED10, TRAF7, FN1, AP2M1, P4HB, GGH, GOLIM4, GARS, ATM, LAMP2, CORO1A, CCT4, PPIB, YIPF5, HSPD1, HSP90AB1, …
GO:0015630~microtubule cytoskeleton	135	5.59934	1.44452e-08	2.18866e-05	KIFC1, DYNC1LI1, DYNC1LI2, SEPT2, TUBB2B, VAPA, PRC1, TUBB2A, TTK, AURKA, AURKB, CDC16, CTNNB1, TUBG1, KIF5B, MYH9, DCTN1, DCTN2, RCC2, FGFR1OP, FLII, TUBA4A, HSPB1, ARL8B, PDCD6IP, DST, SEPT7, SEPT9, DNAH17, KATNB1, KEAP1, C14ORF166, CHEK1, ARPC4, PXN, TUBB, MACF1, KATNA1, CEP170, NPM1, SKA3, CLASP1, CLASP2, EMD, DHX9, CKAP5, PCNT, ALMS1, CDC20, ATM, NEDD1, SARM1, NUP62, PLK1, MAP4, MARCKS, ACAD…
GO:0005789~endoplasmic reticulum membrane	78	3.23517	2.0102e-08	3.04575e-05	CYB5R3, RTN4, RAB9A, VAPA, VAPB, CYP2S1, UBQLN4, RP9, ALG6, TAPBP, SSR1, PIGK, HTRA2, COL4A3BP, RPN1, RPN2, ASPH, SEC24C, DDOST, DHCR24, SGPL1, SPTLC1, SPTLC2, SLC33A1, PIGU, STIM1, PIGT, ERLIN2, KTN1, ERLIN1, PIGS, SACM1L, BCAP31, MAGT1, SEC61B, PPM1L, SEC23B, SRP9, TMX1, FKBP8, DERL2, CYP51A1, SLC37A4, GPAA1, LMAN1, STT3B, FMO5, MIA3, CEPT1, STT3A, SERINC1, DHCR7, MPDU1, DAD1, SEC22A, HSPA5, SE…
GO:0000267~cell fraction	233	9.66404	2.80326e-08	4.24734e-05	LDHB, RAB3GAP2, VAPA, CADM1, VAPB, PPP2R5A, PDLIM5, XRCC6, ADCY6, UTRN, SYNCRIP, LEMD3, RANGAP1, RAB1A, CTNNB1, YARS, PTPRF, MPDZ, AARS, JUP, MGAT2, RARS, RAB14, ABAT, TPST2, TMX1, GNAI3, CYP51A1, FARS2, HMGCS1, ARF6, CALR, SLC29A1, TPI1, VRK2, KRAS, DMD, RAC1, STX16, TMED10, ZMPSTE24, SPHK2, CLCC1, ACACA, GARS, EPRS, CRYZ, VDAC3, PTPN11, ATP2A2, HSPA13, RAB5B, NARS, LNPEP, GBAS, ATP6V0D1, KDELR1…
GO:0048475~coated membrane	29	1.20282	3.91641e-08	5.93393e-05	COPA, AP1M1, CLTA, CLTB, SEC31A, AP1B1, AP2S1, COPZ1, AP3S1, CLTC, COPB2, AP2B1, PICALM, AP3M1, COPB1, AP3D1, SEC24C, AP2M1, AP3B1, SEC23A, AP2A2, COPG2, AP2A1, ARCN1, AP4B1, GGA2, COPE, SEC23B, EPN2
GO:0030117~membrane coat	29	1.20282	3.91641e-08	5.93393e-05	COPA, AP1M1, CLTA, CLTB, SEC31A, AP1B1, AP2S1, COPZ1, AP3S1, CLTC, COPB2, AP2B1, PICALM, AP3M1, COPB1, AP3D1, SEC24C, AP2M1, AP3B1, SEC23A, AP2A2, COPG2, AP2A1, ARCN1, AP4B1, GGA2, COPE, SEC23B, EPN2
GO:0005852~eukaryotic translation initiation factor 3 complex	13	0.539195	5.11771e-08	7.75407e-05	EIF3D, EIF3CL, EIF3A, EIF3B, EIF3G, EIF3H, EIF3E, EIF3F, EIF3K, EIF3L, EIF3I, EIF3J, EIF3M
GO:0005856~cytoskeleton	284	11.7793	5.98596e-08	9.0696e-05	DYNC1LI1, KIFC1, DYNC1LI2, HRNR, PDLIM7, VAPA, TUBB2B, TUBB2A, PDLIM5, UTRN, STOML2, PDLIM1, AURKA, AURKB, CCT3, CDC16, CTNNB1, ILK, KIF5B, MPDZ, TANC1, UBR4, CTNNA1, MYH9, DCTN1, FARP1, DCTN2, JUP, RCC2, CGN, TUBA4A, FLII, ARL8B, DBN1, ADD3, ADD1, ALDOA, LMNB1, LMNB2, DNAH17, AKAP12, IGF2BP2, CHEK1, PXN, FAM65B, PFN1, CDC42EP1, MACF1, DMD, CEP170, SKA3, CDC42EP4, EMD, GIT1, DHX9, PCNT, ALMS1, CD…
GO:0005938~cell cortex	49	2.03235	1.05707e-07	0.000160162	PARD3, NRBP1, SEPT2, EXOC7, CALD1, FERMT2, UTRN, AKAP12, ARF6, LLGL1, CTNNB1, CTTN, EZR, MACF1, FGB, CLASP1, CLASP2, CAP1, TRIP10, EXOC1, ACTB, PARD6B, MYO6, EPB41, MPP1, ACTN4, PRKCI, RAI14, MYH9, SEPT10, NCL, FLNB, FLNA, SEPT11, ITPR2, EPB41L2, PPP1R9B, CORO1A, FNBP1L, CFL1, SPTBN2, SPTBN1, MARCKS, SEPT6, SEPT7, ADD3, SEPT8, SPTAN1, MYH10
GO:0031410~cytoplasmic vesicle	149	6.18001	1.25473e-07	0.00019011	SEC31A, CADM1, ATP1B3, F13A1, CNP, VPS33B, APOA1, PICALM, PACSIN2, SND1, SLC2A1, RPN1, DNAJC5, RAB21, SCAMP1, BSG, MYO6, ACTN4, RAN, PICK1, ERP29, ACTN1, CORO7, COPG2, ARRB2, FNBP1L, DLD, RAB14, RAB13, PDCD6IP, DST, RAB7A, PALM, GNAI3, COPZ1, ATP6V1B2, ITGB1, CALU, STX12, FGB, ALB, RAC1, SLC30A5, TMED10, TRAF7, FN1, AP2M1, P4HB, GGH, GOLIM4, GARS, ATM, LAMP2, CORO1A, CCT4, PPIB, YIPF5, PTPN1, HSP…
GO:0031982~vesicle	154	6.38739	1.43847e-07	0.000217949	SEC31A, CADM1, ATP1B3, VAPA, F13A1, CNP, VPS33B, APOA1, PICALM, PACSIN2, SND1, SLC2A1, RPN1, DNAJC5, RAB21, SCAMP1, BSG, MYO6, ACTN4, RAN, PICK1, ERP29, ACTN1, CORO7, COPG2, ARRB2, FNBP1L, DLD, RAB14, RAB13, PDCD6IP, DST, ALDOA, RAB7A, PALM, GNAI3, COPZ1, ATP6V1B2, ITGB1, CALU, STX12, FGB, ALB, RAC1, SLC30A5, TMED10, TRAF7, FN1, AP2M1, P4HB, GGH, GOLIM4, GARS, ATM, LAMP2, CORO1A, CCT4, PPIB, YIPF…
GO:0005758~mitochondrial intermembrane space	20	0.829531	2.12785e-07	0.000322399	OPA1, LYN, AIFM1, CYCS, PNPT1, TIMM10, AK2, PPOX, TIMM13, CHCHD4, TIMM23, TIMM8B, TIMM8A, NME4, HTRA2, CPOX, TIMM9, NLN, CAT, NDUFS1
GO:0000139~Golgi membrane	57	2.36416	2.78436e-07	0.00042187	COPA, CLTA, RAB9A, CLTB, AP1B1, CHPF2, CLTC, TAPBP, TMF1, B2M, ACTR3, COPB2, GBF1, COPB1, SEC24C, GOLGA5, RAB21, GOLGA3, SEC23A, STX5, BSG, SCAMP3, SCAMP2, MAN1A2, HLA-A, CORO7, MAN1A1, BCAP31, MGAT1, MAN2A1, COPG2, ARRB1, ATP2C1, ARCN1, USO1, GNAS, WASL, MGAT5, CUX1, COPE, SEC23B, GLG1, ARFGAP1, GALNT2, AP1M1, COPZ1, RER1, LMAN1, QSOX1, STX10, RAB2B, TRIM23, B3GAT3, AP2A1, GOSR1, GOLGB1, COG2
GO:0005626~insoluble fraction	182	7.54873	6.58816e-07	0.000998196	SEPT2, CADM1, VAPA, PPP2R5A, VAPB, GNA11, PDLIM5, XRCC6, ADCY6, UTRN, LEMD3, SYNCRIP, CNP, RAB1A, CTNNB1, TAPBP, PRKAR2B, SLC16A1, PRKAR2A, ANK3, PGRMC1, LRRC59, ELOVL2, SLC2A1, STK39, PRKACA, DDOST, DNAJC1, PTPRF, SLC33A1, MPDZ, PICK1, HLA-C, CORO7, HLA-B, MOGS, POR, JUP, ADRM1, MGAT2, ARRB1, RAB14, USO1, ABAT, HSPB1, VAMP3, SLC38A1, CPD, SNX9, TPST2, TMX1, GNAI3, CYP51A1, ARFRP1, ARF6, CALR, LM…
GO:0031970~organelle envelope lumen	21	0.871008	8.84787e-07	0.00134057	OPA1, LYN, AIFM1, CYCS, PNPT1, TIMM10, AK2, PPOX, TIMM13, CHCHD4, TIMM23, TIMM8B, TIMM8A, NME4, HTRA2, IGF2R, CPOX, TIMM9, NLN, CAT, NDUFS1
GO:0005694~chromosome	109	4.52095	2.70622e-06	0.00410023	XRCC5, XRCC4, HIST2H2AA3, XPO1, HMGN2, PPP2R5A, XRCC6, CBX2, H1FX, RANGAP1, AURKB, TTN, HMGN4, PRIM1, HIST1H2BM, CSNK2A1, PRIM2, H2AFZ, H2AFX, TUBG1, RAN, NCAPD3, DCTN1, NCAPD2, DCTN2, RFC5, RFC3, BAZ1A, RFC4, BAZ1B, RFC1, RCC2, RFC2, TELO2, SMARCA5, SEPT7, ADD3, LRPPRC, HMGB1, HMGB2, BLM, CHEK1, BANF1, ACD, HIST1H4A, EIF3E, HNRNPD, SKA3, CLASP1, CLASP2, HIST2H3A, NUF2, AKAP8L, NDC80, POLD3, HDAC…
GO:0005657~replication fork	17	0.705102	4.957e-06	0.0075103	BLM, TP53, CHEK1, POLA2, MCM3, PURA, RPA1, RFC5, POLD3, PRIM1, RFC3, RFC4, RFC1, RFC2, PRIM2, PCNA, H2AFX
GO:0005624~membrane fraction	172	7.13397	5.10163e-06	0.00772943	SEPT2, CADM1, VAPA, PPP2R5A, VAPB, GNA11, PDLIM5, XRCC6, ADCY6, UTRN, LEMD3, SYNCRIP, CNP, CTNNB1, TAPBP, PRKAR2B, SLC16A1, PRKAR2A, ANK3, PGRMC1, LRRC59, ELOVL2, SLC2A1, STK39, PRKACA, DDOST, DNAJC1, PTPRF, SLC33A1, MPDZ, PICK1, HLA-C, CORO7, HLA-B, MOGS, POR, JUP, ADRM1, MGAT2, ARRB1, RAB14, USO1, ABAT, VAMP3, SLC38A1, CPD, SNX9, TPST2, TMX1, GNAI3, CYP51A1, ARFRP1, ARF6, CALR, LMAN1, ITGB1, AT…
GO:0005792~microsome	64	2.6545	5.93804e-06	0.00899662	COPA, CYP2S1, SYNCRIP, LSS, TAPBP, LNPEP, HMOX2, PGRMC1, LRRC59, ELOVL2, DDOST, DNAJC1, PTPRF, AIFM1, RAB4A, CCDC47, CYB5A, CYB5B, POR, DGAT1, USO1, VAMP3, CPD, SNX9, CYP51A1, COMT, LMAN1, CALR, FMO5, IGF1R, ACSL1, TMED2, DMD, STX16, TMED10, PPP3CA, SNAP23, ACSL4, ACSL3, DTNA, SOAT1, DLST, EBP, P4HB, NCEH1, VAC14, CLCC1, SEC11A, EPHX1, ATP1A1, VDAC3, ITPR1, ITPR2, MGST3, HSP90B1, NME1-NME2, VCP, …
GO:0044430~cytoskeletal part	197	8.17088	5.9944e-06	0.009082	KIFC1, DYNC1LI1, DYNC1LI2, PDLIM7, TUBB2B, VAPA, TUBB2A, UTRN, AURKA, CDC16, AURKB, CTNNB1, ILK, KIF5B, MPDZ, TANC1, MYH9, DCTN1, DCTN2, RCC2, CGN, FLII, TUBA4A, ARL8B, DBN1, ADD1, LMNB1, LMNB2, DNAH17, CHEK1, IGF2BP2, PXN, CEP170, SKA3, EMD, DHX9, PCNT, ALMS1, CDC20, SEPT10, ATM, SEPT11, NUP62, MAP4, MARCKS, ACAD11, RANBP10, LIMA1, KIAA0368, FERMT2, GTSE1, ACTR3, ACTR2, NUBP2, DYNLL2, SLMAP, TUB…

## Sheet: GO Biological process
Term	Protein Count	%	P-Value	FDR	Genes
GO:0046907~intracellular transport	244	10.1203	2.28545e-47	4.25432e-44	RAB3GAP2, SEC31A, USE1, SSR1, GBF1, VPS4B, VPS4A, STAM, VPS13A, OPA1, KIF5B, RAN, VPS45, MYH9, ERGIC1, ERGIC2, NPC1, AAAS, ATP2C1, TXNDC5, RAB14, SRP72, MYBBP1A, TMX1, MTX3, MTX2, MTX1, AKAP12, RER1, CALR, CDC37, STX12, ACD, MACF1, STX18, STX16, NUP50, TMED10, STX10, SRP54, NXF1, HNRNPA1, ATP2A2, PCNA, GOSR1, ATP5D, SPG7, AP1B1, PDIA3, AP2S1, TIMM17B, WASF2, AP3S1, COPB2, AP2B1, COPB1, RAB6B, ATP…
GO:0045184~establishment of protein localization	262	10.8669	5.43941e-43	1.01253e-39	RAB3GAP2, SEC31A, USE1, RAB1B, VPS33B, VPS33A, RAB1A, SSR1, VPS4B, RAB23, VPS4A, STAM, VPS13A, RAB21, RAN, VPS45, MYH9, RAB18, RAB14, SRP72, RAB13, RAB10, MTX3, MTX2, MTX1, AKAP12, ARF6, CHCHD4, CALR, CDC37, ACD, STX12, MACF1, STX18, STX16, NUP50, TMED10, STX10, SRP54, RABEP2, NUP62, ARF3, ARF4, PCNA, GOSR1, AP1B1, RAB5B, PDIA3, RAB5C, TSG101, AP2S1, TIMM17B, AP3S1, PDIA4, CANX, COPB2, AP2B1, COP…
GO:0015031~protein transport	260	10.7839	8.81727e-43	1.64132e-39	RAB3GAP2, SEC31A, USE1, RAB1B, VPS33B, VPS33A, RAB1A, SSR1, VPS4B, RAB23, VPS4A, STAM, VPS13A, RAB21, RAN, VPS45, MYH9, RAB18, RAB14, SRP72, RAB13, RAB10, MTX3, MTX2, MTX1, AKAP12, ARF6, CHCHD4, CALR, CDC37, ACD, STX12, MACF1, STX18, STX16, NUP50, TMED10, STX10, SRP54, RABEP2, NUP62, ARF3, ARF4, PCNA, GOSR1, AP1B1, RAB5B, PDIA3, RAB5C, TSG101, AP2S1, TIMM17B, AP3S1, PDIA4, CANX, COPB2, AP2B1, COP…
GO:0008104~protein localization	283	11.7379	5.97969e-41	1.11311e-37	RAB3GAP2, OXA1L, SEC31A, USE1, RAB1B, AURKB, VPS33B, VPS33A, RAB1A, CTNNB1, SSR1, VPS4B, RAB23, VPS4A, STAM, VPS13A, RAB21, RAN, VPS45, MYH9, RAB18, RAB14, SRP72, RAB13, RAB10, PALM, MTX3, MTX2, MTX1, AKAP12, AKAP10, ARF6, CHCHD4, CALR, CDC37, ACD, STX12, MACF1, STX18, DMD, STX16, NUP50, TMED10, STX10, SRP54, NDC80, RABEP2, NUP62, ARF3, ARF4, PCNA, GOSR1, AP1B1, RAB5B, PDIA3, RAB5C, TSG101, AP2S1…
GO:0006091~generation of precursor metabolites and energy	138	5.72377	8.42995e-36	1.56922e-32	LDHB, OXA1L, LDHA, ATP6AP1, NDUFAB1, PGAM1, OGDH, PDHB, UQCR10, UQCR11, IDH3G, PDHA1, FECH, SUCLG2, SUCLG1, PPP1CC, COX6C, PPP1CA, NNT, PGM1, DLD, ATP5C1, ATPIF1, MDH2, ALDOA, TMX1, ENPP1, FDX1, COX7C, ATP6V1B2, TPI1, IDH2, FH, FDXR, IDH3B, CRAT, DLAT, IDH3A, SLC25A12, NDUFV3, NRF1, SLC25A13, NDUFV1, NDUFV2, COX6A1, UQCRC2, ATP5D, ACOX1, UQCRC1, PHKB, ATP5B, CYC1, PRKAG2, UQCRFS1, UQCRQ, NDUFAF1,…
GO:0045333~cellular respiration	67	2.77893	1.3383e-32	2.49122e-29	UQCRC2, OXA1L, UQCRC1, NDUFAB1, NDUFAF1, PDHB, NDUFS7, NDUFS6, NDUFS5, UQCR10, UQCR11, IDH3G, NDUFS4, SLC1A3, NDUFS8, CAT, NDUFS3, SUCLA2, NDUFS2, NDUFS1, COX15, NDUFB10, ACO2, ALDH5A1, SUCLG2, SUCLG1, CYCS, NDUFC2, NDUFC1, NDUFA10, NNT, UQCRH, DLD, MDH2, UQCRB, NDUFB3, NDUFB4, NDUFB5, NDUFB6, NDUFB7, NDUFB8, NDUFB9, NDUFB2, IDH2, FH, NDUFA4, NDUFA5, DLST, NDUFA2, NDUFA3, NDUFA8, NDUFA9, NDUFA6, …
GO:0006886~intracellular protein transport	145	6.0141	2.89544e-30	5.38979e-27	RAB3GAP2, GRPEL2, SRP14, XPO1, GRPEL1, XPO5, ATP6AP1, EIF5A, MIPEP, SSR1, TIMM9, STAM, SAR1A, MYO6, RAN, VPS45, PICK1, ERP29, TIMM8B, BCAP31, TIMM8A, COPG2, SEC61B, USO1, SRP72, SNX9, DERL2, ARFGAP3, STX7, SNX6, MTX3, STAM2, MTX2, COPZ1, MTX1, SNX2, KATNB1, AKAP12, SNX1, NAPA, CALR, CDC37, TOMM7, STX12, ACD, MACF1, CSE1L, TOMM5, STX18, STX16, NPM1, STX10, SEC61A1, AP2M1, SRP54, TOMM40, ICMT, TRNT…
GO:0070727~cellular macromolecule localization	152	6.30444	1.06119e-28	1.97538e-25	RAB3GAP2, GRPEL2, SRP14, XPO1, OXA1L, GRPEL1, XPO5, ATP6AP1, EIF5A, AURKB, MIPEP, SSR1, CTNNB1, TIMM9, STAM, SAR1A, MYO6, RAN, VPS45, PICK1, ERP29, TIMM8B, BCAP31, TIMM8A, COPG2, SEC61B, USO1, SRP72, SNX9, DERL2, ARFGAP3, STX7, SNX6, MTX3, STAM2, MTX2, COPZ1, MTX1, SNX2, KATNB1, AKAP12, SNX1, NAPA, CALR, CDC37, TOMM7, STX12, ACD, MACF1, CSE1L, TOMM5, STX18, STX16, NPM1, STX10, SEC61A1, AP2M1, SRP…
GO:0034613~cellular protein localization	151	6.26296	1.50276e-28	2.79736e-25	RAB3GAP2, GRPEL2, SRP14, XPO1, OXA1L, GRPEL1, XPO5, ATP6AP1, EIF5A, AURKB, MIPEP, SSR1, CTNNB1, TIMM9, STAM, SAR1A, MYO6, RAN, VPS45, PICK1, ERP29, TIMM8B, BCAP31, TIMM8A, COPG2, SEC61B, USO1, SRP72, SNX9, DERL2, ARFGAP3, STX7, SNX6, MTX3, STAM2, MTX2, COPZ1, MTX1, SNX2, KATNB1, AKAP12, SNX1, NAPA, CALR, CDC37, TOMM7, STX12, ACD, MACF1, CSE1L, TOMM5, STX18, STX16, NPM1, STX10, SEC61A1, AP2M1, SRP…
GO:0015980~energy derivation by oxidation of organic compounds	76	3.15222	5.93952e-26	1.10563e-22	UQCRC2, OXA1L, UQCRC1, PHKB, PRKAG2, NDUFAB1, NDUFAF1, PDHB, NDUFS7, NDUFS6, NDUFS5, UQCR10, IDH3G, UQCR11, NDUFS4, SLC1A3, NDUFS8, CAT, NDUFS3, SUCLA2, NDUFS2, NDUFS1, COX15, NDUFB10, ACO2, ALDH5A1, SUCLG2, SUCLG1, CYCS, NDUFC2, NDUFC1, PPP1CC, NDUFA10, ACADVL, PPP1CA, NNT, UQCRH, DLD, GNAS, MDH2, UQCRB, NDUFB3, NDUFB4, NDUFB5, NDUFB6, NDUFB7, NDUFB8, NDUFB9, NDUFB2, IDH2, FH, NDUFA4, DLST, NDUF…
GO:0022900~electron transport chain	66	2.73745	1.31372e-25	2.44546e-22	UQCRC2, UQCRC1, CYC1, NDUFAB1, UQCRFS1, UQCRQ, NDUFAF1, NDUFS7, NDUFS6, NDUFS5, UQCR10, UQCR11, NDUFS4, SLC1A3, NDUFS8, NDUFS3, NDUFS2, NDUFS1, COX15, NDUFB11, NDUFB10, ALDH5A1, CYCS, NDUFC2, NDUFA13, CYB5A, NDUFC1, CYB5B, NDUFA10, NDUFA12, UQCRH, DLD, TXN, UQCRB, NDUFB3, NDUFB4, TMX1, NDUFB5, NDUFB6, NDUFB7, FDX1, NDUFB8, NDUFB9, NDUFB2, ETFDH, ETFB, ETFA, NDUFA4, NDUFA5, NDUFA2, NDUFA3, NDUFA8,…
GO:0022904~respiratory electron transport chain	47	1.9494	1.01285e-24	1.88539e-21	NDUFB3, NDUFB4, NDUFB5, NDUFB6, UQCRC1, NDUFB7, NDUFB8, NDUFB9, NDUFAB1, NDUFAF1, NDUFB2, NDUFS7, NDUFS6, NDUFS5, UQCR10, UQCR11, NDUFS4, SLC1A3, NDUFS8, NDUFS3, NDUFS2, NDUFS1, COX15, NDUFA4, NDUFA5, NDUFA2, NDUFA3, NDUFB10, NDUFA8, ALDH5A1, NDUFA9, NDUFA6, NDUFA7, NDUFC2, NDUFC1, NDUFA10, SOD2, SLC25A12, SDHA, NDUFV3, SDHB, SLC25A13, UQCRH, NDUFV1, DLD, NDUFV2, UQCRB
GO:0055114~oxidation reduction	193	8.00498	4.0078e-24	7.46042e-21	HCCS, LDHB, OXA1L, LDHA, PGD, NDUFAB1, OGDH, COX5A, ALDH1L2, HIBADH, PDHB, GLDC, UQCR10, UQCR11, IDH3G, PLOD1, PLOD2, CPOX, PLOD3, SCD5, ASPH, PDHA1, HADH, ALDH6A1, DHRS7B, TECR, POR, PYCR1, SCCPDH, PYCR2, NNT, DLD, MDH2, HSD17B11, TMX1, HSD17B10, ACADSB, ME2, CYP51A1, FDX1, GLUD1, HSD17B12, GCLM, HADHA, IVD, DHODH, IDH2, ALDH4A1, GPD2, GCDH, SCD, FDXR, IDH3B, CRYZ, IDH3A, SLC25A12, NDUFV3, SLC25…
GO:0016192~vesicle-mediated transport	179	7.42431	6.42991e-24	1.19691e-20	NRBP1, SEC31A, PDLIM7, USE1, TXLNA, VPS33B, VPS33A, RAB1A, CTNNB1, TAPBP, PICALM, PACSIN3, GBF1, PACSIN2, PUM1, VPS4B, VPS4A, VPS13A, SAR1A, SCAMP1, SCAMP3, SCAMP2, MYO6, GOLT1B, VPS45, PICK1, ERGIC1, ERGIC2, ERGIC3, BCAP31, NPC1, COPG2, GAPVD1, RAB18, ARRB2, ARRB1, FNBP1L, TXNDC5, RAB14, USO1, VAMP3, RAB13, VPS26A, SH3GL1, ARFGAP1, RAB7A, ARFGAP2, TMX1, ARFGAP3, STX7, GNAI3, COPZ1, SNX2, SNX1, R…
GO:0048193~Golgi vesicle transport	67	2.77893	5.80072e-22	1.07979e-18	COPA, CLTA, SEC31A, NRBP1, ATL2, AP1B1, ATL3, USE1, CLTC, TAPBP, COPB2, GBF1, COPB1, PUM1, RAB6B, VPS13A, SEC24C, GOLGA5, CLINT1, SAR1A, GOLGA3, SEC23A, SCAMP1, ARL1, SCAMP3, STX4, SCAMP2, PICK1, ERGIC1, ERGIC2, COPG2, ARRB1, TXNDC5, ARCN1, RAB14, CUX1, SEC23B, COPE, ARFGAP1, TMX1, AP1M1, STX7, COPZ1, RER1, NAPA, LMAN1, DTNBP1, STX18, STX16, SEC22A, TMED10, SEC22B, EXOC5, SNAP23, STX10, HSPA8, RA…
GO:0043038~amino acid activation	37	1.53463	9.27002e-22	1.72559e-18	TARS2, VARS2, NARS, FARS2, WARS2, QARS, IARS2, VARS, KARS, IARS, WARS, NARS2, HARS2, LARS, MARS2, POLG2, MARS, YARS, CARS, AIMP1, DARS, RARS2, AARS, GARS, EPRS, LARS2, DARS2, SARS2, EARS2, TARS, RARS, HARS, FARSB, CARS2, YARS2, FARSA, AARS2
GO:0043039~tRNA aminoacylation	37	1.53463	9.27002e-22	1.72559e-18	TARS2, VARS2, NARS, FARS2, WARS2, QARS, IARS2, VARS, KARS, IARS, WARS, NARS2, HARS2, LARS, MARS2, POLG2, MARS, YARS, CARS, AIMP1, DARS, RARS2, AARS, GARS, EPRS, LARS2, DARS2, SARS2, EARS2, TARS, RARS, HARS, FARSB, CARS2, YARS2, FARSA, AARS2
GO:0006418~tRNA aminoacylation for protein translation	37	1.53463	9.27002e-22	1.72559e-18	TARS2, VARS2, NARS, FARS2, WARS2, QARS, IARS2, VARS, KARS, IARS, WARS, NARS2, HARS2, LARS, MARS2, POLG2, MARS, YARS, CARS, AIMP1, DARS, RARS2, AARS, GARS, EPRS, LARS2, DARS2, SARS2, EARS2, TARS, RARS, HARS, FARSB, CARS2, YARS2, FARSA, AARS2
GO:0006119~oxidative phosphorylation	56	2.32269	1.98141e-21	3.68835e-18	ATP5D, UQCRC2, UQCRC1, ATP6AP1, ATP5B, NDUFAB1, NDUFAF1, NDUFS7, NDUFS6, NDUFS5, UQCR10, UQCR11, NDUFS4, NDUFS8, ATP5L, ATP5O, NDUFS3, ATP5I, ATP6V0D1, ATP5H, NDUFS2, NDUFS1, ATP5J, COX15, NDUFB10, NDUFC2, ATP6V1H, NDUFC1, NDUFA10, ATP6V1A, UQCRH, DLD, ATP5C1, UQCRB, NDUFB3, NDUFB4, NDUFB5, NDUFB6, NDUFB7, NDUFB8, NDUFB9, ATP6V1B2, NDUFB2, NDUFA4, NDUFA5, NDUFA2, NDUFA3, NDUFA8, NDUFA9, NDUFA6, N…
GO:0043933~macromolecular complex subunit organization	200	8.29531	4.9698e-21	9.25116e-18	HIST2H2AA3, OXA1L, TUBB2B, TUBB2A, H1FX, CTNNB1, HIST1H2BM, PICALM, MED26, ILK, H2AFZ, H2AFX, SYK, TAF6L, JUP, MED17, ADSL, TUBA4A, ATPIF1, LAMC1, HSD17B10, CALR, PDSS1, PDSS2, PXN, RAC1, AGRN, NAT14, SRP54, CNKSR3, DDX1, EPRS, SMAD3, SEPT11, SUPT16H, CHAF1B, COX11, CRNKL1, WASF3, AP2S1, WASF1, NAP1L1, EIF2A, NAP1L4, LONP1, TUBB6, TUBB8, TUBB3, COX15, SRPK2, PRPF31, HIST1H1E, STX4, HIST1H1C, SF1,…
GO:0007005~mitochondrion organization	67	2.77893	2.13377e-20	3.97196e-17	NDUFAF4, GRPEL2, GRPEL1, OXA1L, SPG7, TIMM17B, MPV17, PEX5, TIMM50, MIPEP, PRDX3, CXADR, NDUFAF3, NDUFS7, GPX1, NDUFS5, LONP1, NDUFS4, HTRA2, COL4A3BP, NDUFS8, TIMM9, TFB2M, DNAJC19, HSP90AA1, OPA1, SLC25A4, SSBP1, POLG, TP53, TMEM70, TIMM23, TIMM44, TIMM8B, TIMM8A, MFN2, MAN2A1, LETM1, TOMM20, TOMM22, RAB3A, YWHAZ, SAMM50, MTX3, MTX2, MTX1, TIMM10, TIMM13, GFM2, FIS1, TFAM, TOMM7, TOMM5, GFM1, H…
GO:0042773~ATP synthesis coupled electron transport	40	1.65906	2.30108e-20	4.2834e-17	NDUFB3, NDUFB4, NDUFB5, NDUFB6, UQCRC1, NDUFB7, NDUFB8, NDUFB9, NDUFAB1, NDUFAF1, NDUFB2, NDUFS7, NDUFS6, NDUFS5, UQCR10, NDUFS4, UQCR11, NDUFS8, NDUFS3, NDUFS2, NDUFS1, COX15, NDUFA4, NDUFA5, NDUFA2, NDUFA3, NDUFB10, NDUFA8, NDUFA9, NDUFA6, NDUFA7, NDUFC2, NDUFC1, NDUFA10, NDUFV3, UQCRH, NDUFV1, NDUFV2, DLD, UQCRB
GO:0042775~mitochondrial ATP synthesis coupled electron transport	40	1.65906	2.30108e-20	4.2834e-17	NDUFB3, NDUFB4, NDUFB5, NDUFB6, UQCRC1, NDUFB7, NDUFB8, NDUFB9, NDUFAB1, NDUFAF1, NDUFB2, NDUFS7, NDUFS6, NDUFS5, UQCR10, NDUFS4, UQCR11, NDUFS8, NDUFS3, NDUFS2, NDUFS1, COX15, NDUFA4, NDUFA5, NDUFA2, NDUFA3, NDUFB10, NDUFA8, NDUFA9, NDUFA6, NDUFA7, NDUFC2, NDUFC1, NDUFA10, NDUFV3, UQCRH, NDUFV1, NDUFV2, DLD, UQCRB
GO:0065003~macromolecular complex assembly	189	7.83907	2.3512e-20	4.3767e-17	XPO1, HIST2H2AA3, OXA1L, OCLN, TUBB2B, TUBB2A, SNRPD3, CAPZA1, SNRPD1, H1FX, TTN, CTNNB1, TAPBP, APOA2, HIST1H2BM, PICALM, APOA1, MED26, ILK, H2AFZ, H2AFX, DDX20, TUBG1, SYK, DARS, PICK1, TAF6L, JUP, ADRM1, MED17, SNRPB, SMARCA5, ADSL, TUBA4A, ATPIF1, VAMP3, CELF1, LAMC1, SNRPF, SNRPE, SEPT7, SEPT9, HSD17B10, HMGB2, BLM, ARPC4, CALR, PDSS1, PDSS2, PXN, LLGL1, TUBB, EIF3A, HIST1H4A, CSE1L, FGB, RA…
GO:0006120~mitochondrial electron transport, NADH to ubiquinone	34	1.4102	3.79725e-20	7.06849e-17	NDUFB3, NDUFB4, NDUFB5, NDUFB6, NDUFB7, NDUFB8, NDUFB9, NDUFAB1, NDUFAF1, NDUFB2, NDUFS7, NDUFS6, NDUFS5, NDUFS4, NDUFS8, NDUFS3, NDUFS2, NDUFS1, NDUFA4, NDUFA5, NDUFA2, NDUFA3, NDUFB10, NDUFA8, NDUFA9, NDUFA6, NDUFA7, NDUFC2, NDUFC1, NDUFA10, NDUFV3, NDUFV1, NDUFV2, DLD
GO:0034621~cellular macromolecular complex subunit organization	120	4.97719	3.51151e-19	6.5366e-16	HIST2H2AA3, XPO1, OXA1L, TUBB2B, TUBB2A, SNRPD3, SNRPD1, H1FX, TTN, HIST1H2BM, PICALM, H2AFZ, H2AFX, DDX20, TUBG1, PICK1, ADRM1, SMARCA5, SNRPB, TUBA4A, CELF1, SNRPF, SNRPE, XRN2, HMGB2, ARPC4, CALR, PXN, GFM2, EIF3A, TUBB, HIST1H4A, CSE1L, FGB, RAC1, NPM1, AGRN, HIST2H3A, SRP54, DDX1, SMAD3, MTRF1L, MRRF, SUPT16H, HSPD1, CHAF1B, NDUFAF4, COX11, WASF3, CRNKL1, HP1BP3, AP2S1, WASF1, NAP1L1, EIF2A,…
GO:0006605~protein targeting	85	3.52551	1.29929e-18	2.4186e-15	SRP14, GRPEL2, XPO1, GRPEL1, PDIA3, XPO5, ATP6AP1, TIMM17B, EIF5A, PEX5, PEX3, MIPEP, SSR1, TIMM9, RANBP2, KPNB1, DNAJC19, AP3B1, MYO6, RAN, PICK1, TP53, PRKCI, NDUFA13, IPO9, IPO8, TIMM23, TIMM44, TIMM8B, TIMM8A, MFN2, SEC61B, IPO7, IPO4, NUP205, IPO5, TOMM20, KPNA6, KPNA5, TOMM22, SRP72, KPNA2, KPNA1, SRP9, YWHAZ, NUP98, MTX3, MTX2, MTX1, TIMM10, AKAP12, KATNB1, TIMM13, POLA2, CALR, SEC62, CDC3…
GO:0016071~mRNA metabolic process	119	4.93571	2.27859e-17	4.24155e-14	U2AF2, SNRPD3, LSM7, SNRPD1, SYNCRIP, NONO, DNAJB11, SRRM2, TARDBP, U2AF1, DDX20, LUC7L3, EFTUD2, HNRNPA2B1, PTBP1, MTPAP, CSTF2T, HNRNPR, HNRNPU, SERBP1, SNRPB, CELF2, CELF1, SNRPF, SNRPE, XRN2, FUS, PNPT1, IGF2BP1, HSPA1B, HNRNPA3, HNRNPL, HNRNPM, MOV10, DDX46, HNRNPK, EIF3E, HNRNPF, HNRNPD, HNRNPC, PABPC1, DDX41, NOVA1, DHX9, CSTF3, CSTF2, PAIP1, DDX1, SSB, SNW1, DDX5, HNRNPA1, RBMX, HNRNPA0, …
GO:0034622~cellular macromolecular complex assembly	107	4.43799	3.14037e-17	5.84572e-14	HIST2H2AA3, XPO1, OXA1L, TUBB2B, TUBB2A, SNRPD3, SNRPD1, H1FX, TTN, HIST1H2BM, PICALM, H2AFZ, H2AFX, TUBG1, DDX20, PICK1, ADRM1, SMARCA5, SNRPB, TUBA4A, CELF1, SNRPF, SNRPE, HMGB2, ARPC4, CALR, PXN, EIF3A, TUBB, CSE1L, HIST1H4A, FGB, NPM1, RAC1, AGRN, HIST2H3A, SRP54, DDX1, SMAD3, HSPD1, CHAF1B, NDUFAF4, COX11, WASF3, CRNKL1, HP1BP3, AP2S1, WASF1, NAP1L1, EIF2A, NAP1L4, NDUFAF3, NDUFS7, NDUFS5, N…
GO:0016044~membrane organization	121	5.01866	3.54049e-17	6.59054e-14	OXA1L, SEC31A, VAPA, PDLIM7, VPS33B, PICALM, GBF1, PACSIN3, PACSIN2, ATG7, TIMM9, PUM1, SCAMP1, OPA1, MYO6, PICK1, LPCAT2, TIMM8B, TIMM8A, NPC1, LETM1, GAPVD1, RAB18, ARRB2, FNBP1L, ARRB1, TXNDC5, USO1, VAMP3, SH3GL1, ARFGAP1, RAB7A, STX7, GNAI3, COPZ1, SNX2, SNX1, NAPA, SNX4, AHSG, KRAS, ITGAV, MTCH1, RAC1, ZMPSTE24, AGRN, EMD, RAB8A, NPLOC4, MRC2, PPIF, CORO1C, CORO1A, RABEP2, SEC13, CLCN5, MYH…
GO:0000375~RNA splicing, via transesterification reactions	66	2.73745	7.58279e-17	2.10942e-13	CRNKL1, SNRPD3, U2AF2, LSM7, SNRPD1, YBX1, PCBP1, PRMT5, PCBP2, U2AF1, DBR1, DDX20, SRPK2, PRPF31, EFTUD2, PTBP1, HNRNPA2B1, SF1, HNRNPR, HNRNPU, SMN1, PRPF6, SNRNP200, CPSF7, SNRPB, CELF1, SNRPF, CPSF3, SNRPE, CPSF2, FUS, SF3B3, SF3B2, HNRNPL, HNRNPA3, HNRNPM, SF3B1, HNRNPK, CD2BP2, HNRNPF, PRPF8, USP39, HNRNPD, SNRNP70, HNRNPC, GEMIN7, NOVA1, GEMIN5, DHX9, CSTF3, CSTF2, DDX1, SNW1, SF3A2, HNRNP…
GO:0000398~nuclear mRNA splicing, via spliceosome	66	2.73745	7.58279e-17	2.10942e-13	CRNKL1, SNRPD3, U2AF2, LSM7, SNRPD1, YBX1, PCBP1, PRMT5, PCBP2, U2AF1, DBR1, DDX20, SRPK2, PRPF31, EFTUD2, PTBP1, HNRNPA2B1, SF1, HNRNPR, HNRNPU, SMN1, PRPF6, SNRNP200, CPSF7, SNRPB, CELF1, SNRPF, CPSF3, SNRPE, CPSF2, FUS, SF3B3, SF3B2, HNRNPL, HNRNPA3, HNRNPM, SF3B1, HNRNPK, CD2BP2, HNRNPF, PRPF8, USP39, HNRNPD, SNRNP70, HNRNPC, GEMIN7, NOVA1, GEMIN5, DHX9, CSTF3, CSTF2, DDX1, SNW1, SF3A2, HNRNP…
GO:0000377~RNA splicing, via transesterification reactions with bulged adenosine as nucleophile	66	2.73745	7.58279e-17	2.10942e-13	CRNKL1, SNRPD3, U2AF2, LSM7, SNRPD1, YBX1, PCBP1, PRMT5, PCBP2, U2AF1, DBR1, DDX20, SRPK2, PRPF31, EFTUD2, PTBP1, HNRNPA2B1, SF1, HNRNPR, HNRNPU, SMN1, PRPF6, SNRNP200, CPSF7, SNRPB, CELF1, SNRPF, CPSF3, SNRPE, CPSF2, FUS, SF3B3, SF3B2, HNRNPL, HNRNPA3, HNRNPM, SF3B1, HNRNPK, CD2BP2, HNRNPF, PRPF8, USP39, HNRNPD, SNRNP70, HNRNPC, GEMIN7, NOVA1, GEMIN5, DHX9, CSTF3, CSTF2, DDX1, SNW1, SF3A2, HNRNP…
GO:0006396~RNA processing	155	6.42887	2.21353e-16	4.10783e-13	NAF1, U2AF2, SNRPD3, LSM7, SNRPD1, RP9, SYNCRIP, NONO, DDX17, SRRM2, INTS7, TARDBP, U2AF1, TFB2M, DDX20, MTO1, LUC7L3, KRR1, GTPBP3, EFTUD2, HNRNPA2B1, PTBP1, AARS, MTPAP, CSTF2T, HNRNPR, RNMTL1, HNRNPU, RSL1D1, PA2G4, NOP2, TRMT11, SNRPB, CELF2, CELF1, TFB1M, SNRPF, SNRPE, XRN2, FUS, HSD17B10, ELAC2, PUS1, FARS2, PABPC4, PNPT1, RRAGC, HNRNPA3, HNRNPL, HNRNPM, MOV10, DDX46, HNRNPK, HNRNPF, PRKRA,…
GO:0006461~protein complex assembly	145	6.0141	5.72192e-16	1.03251e-12	XPO1, OXA1L, OCLN, TUBB2B, TUBB2A, CAPZA1, TTN, CTNNB1, TAPBP, PICALM, MED26, ILK, TUBG1, SYK, DARS, PICK1, TAF6L, JUP, ADRM1, MED17, SMARCA5, ADSL, TUBA4A, VAMP3, ATPIF1, LAMC1, SEPT7, SEPT9, HSD17B10, BLM, ARPC4, CALR, PDSS1, PDSS2, PXN, LLGL1, TUBB, CSE1L, FGB, RAC1, NPM1, AGRN, NAT14, TAF2, PARD6B, SRP54, CNKSR3, EPRS, SMAD3, SEPT11, LIN7A, VCP, GTF2F1, HSPD1, ATG16L1, CHAF1B, NDUFAF4, COX11,…
GO:0070271~protein complex biogenesis	145	6.0141	5.72192e-16	1.03251e-12	XPO1, OXA1L, OCLN, TUBB2B, TUBB2A, CAPZA1, TTN, CTNNB1, TAPBP, PICALM, MED26, ILK, TUBG1, SYK, DARS, PICK1, TAF6L, JUP, ADRM1, MED17, SMARCA5, ADSL, TUBA4A, VAMP3, ATPIF1, LAMC1, SEPT7, SEPT9, HSD17B10, BLM, ARPC4, CALR, PDSS1, PDSS2, PXN, LLGL1, TUBB, CSE1L, FGB, RAC1, NPM1, AGRN, NAT14, TAF2, PARD6B, SRP54, CNKSR3, EPRS, SMAD3, SEPT11, LIN7A, VCP, GTF2F1, HSPD1, ATG16L1, CHAF1B, NDUFAF4, COX11,…
GO:0006457~protein folding	70	2.90336	2.27894e-15	4.34097e-12	HSP90AB1, COPA, GRPEL2, GRPEL1, DNAJC10, PDIA6, PDIA5, DNAJB12, CCT2, CCT3, CANX, HSP90AB2P, BAG5, PIGK, APOA2, DNAJB11, BAG3, SLMAP, BAG2, DNAJC7, MKKS, DNAJC5, RANBP2, DNAJC1, DNAJC19, HSP90AA1, ERP29, AARS, TBCE, DNAJC21, CCT6A, CLPX, ST13, TRAP1, RUVBL2, FKBP10, UGGT1, FKBP2, FKBP8, FKBP5, FKBP4, PPIL2, FKBP3, LMAN1, CALR, STUB1, SEC63, TOR1A, MPDU1, DNAJA1, PPIL4, HSPE1, QSOX1, HSPA8, DNAJA3…
GO:0006412~translation	106	4.39652	3.07886e-15	5.78426e-12	RPL17, TARS2, EIF5, HBS1L, EIF5B, EIF5A, IARS2, EIF3CL, EIF1AY, EIF2B3, EIF2B4, RPS27A, EIF2B5, CARS, YARS, DARS, AARS, EIF2S3, EEF2, SARS2, EARS2, RSL1D1, EIF2S1, RARS, EIF2S2, HARS, PELO, YARS2, EEFSEC, EIF2AK2, EEF1B2, FARS2, PABPC4, MRPS11, WARS2, IGF2BP3, PTRH2, MTIF2, KARS, QRSL1, EIF3D, GFM2, EIF3A, EIF3B, EIF3G, EIF3H, GFM1, EIF3E, EIF3F, HARS2, EIF3K, EIF3L, EIF3I, EIF3J, EIF3M, RPS24, E…
GO:0008380~RNA splicing	95	3.94027	4.73692e-15	8.88178e-12	CRNKL1, SNRPD3, U2AF2, LSM7, SNRPD1, SYNCRIP, RP9, SKIV2L2, YBX1, NONO, PCBP1, SRRM2, PRMT5, TARDBP, PCBP2, U2AF1, DBR1, DDX20, LUC7L3, SRPK2, PPP2R1A, PRPF31, EFTUD2, PTBP1, HNRNPA2B1, SF1, HNRNPR, SRPK1, HNRNPU, TTF2, SMN1, PRPF6, EIF4A3, SNRNP200, KHSRP, SNRPB, CPSF7, CELF1, RBM39, ESRP2, CPSF3, SNRPF, SNRPE, CPSF2, FUS, SF3B3, RRAGC, SF3B2, HNRNPA3, HNRNPL, PRPF19, SF3B1, HNRNPM, HNRNPK, DDX4…
GO:0006397~mRNA processing	102	4.23061	1.88157e-14	3.49276e-11	U2AF2, SNRPD3, LSM7, SNRPD1, SYNCRIP, NONO, TARDBP, SRRM2, U2AF1, DDX20, LUC7L3, EFTUD2, PTBP1, HNRNPA2B1, MTPAP, CSTF2T, HNRNPR, HNRNPU, SNRPB, CELF2, CELF1, SNRPF, SNRPE, XRN2, FUS, HNRNPL, HNRNPA3, HNRNPM, MOV10, HNRNPK, DDX46, HNRNPF, HNRNPD, PABPC1, HNRNPC, DDX41, NOVA1, DHX9, CSTF3, CSTF2, DDX1, SNW1, DDX5, HNRNPA1, RBMX, HNRNPA0, HNRNPH3, UPF3B, HNRNPH2, GTF2F1, HNRNPH1, SMC1A, PUF60, ADAR…
GO:0033365~protein localization in organelle	60	2.48859	3.8175e-14	7.10876e-11	XPO1, GRPEL2, SRP14, GRPEL1, PDIA3, ATP6AP1, TIMM17B, MIPEP, TIMM9, RANBP2, KPNB1, DNAJC19, RAN, TP53, NDUFA13, IPO9, IPO8, TIMM23, TIMM44, TIMM8B, TIMM8A, MFN2, SEC61B, IPO7, IPO4, NUP205, IPO5, TOMM20, KPNA6, KPNA5, TOMM22, SRP72, KPNA2, KPNA1, SRP9, YWHAZ, NUP98, MTX3, MTX2, MTX1, TIMM10, TIMM13, POLA2, TOMM7, CEP57, MACF1, CSE1L, TOMM5, PPP3CA, TNPO1, SEC61A1, RBM22, SRP54, IPO11, TOMM40, TRN…
GO:0017038~protein import	56	2.32269	4.1331e-14	7.68829e-11	XPO1, GRPEL2, GRPEL1, PDIA3, ATP6AP1, TIMM17B, PEX5, PEX3, MIPEP, TIMM9, RANBP2, KPNB1, DNAJC19, RAN, TP53, NDUFA13, IPO9, IPO8, TIMM23, TIMM44, TIMM8B, TIMM8A, MFN2, SEC61B, IPO7, NUP205, IPO4, IPO5, TOMM20, KPNA6, KPNA5, TOMM22, KPNA2, KPNA1, YWHAZ, NUP98, MTX3, MTX2, MTX1, TIMM10, TIMM13, POLA2, TOMM7, CEP57, CSE1L, TOMM5, PEX14, PPP3CA, TNPO1, RBM22, IPO11, TOMM40, TRNT1, TOMM70A, NOP58, SPTB…
GO:0000278~mitotic cell cycle	111	4.6039	9.29128e-14	1.72984e-10	KIFC1, SEPT2, PRC1, TUBB2B, TUBB2A, TTK, AURKA, AURKB, CDC16, TTN, CUL3, CUL2, TARDBP, CCNA2, RPS27A, ZC3HC1, ANAPC5, RAN, TBRG4, SKP1, DCTN1, NCAPD3, NCAPD2, DCTN2, RCC2, PSMA4, NEK9, ANAPC7, SEPT7, FZR1, PPP2R3B, BLM, KATNB1, CHEK1, ITGB1, TUBB, NCAPG2, KATNA1, CDC123, SKA3, CLASP1, CLASP2, TCF3, TAF2, CKAP5, NUF2, CDC23, CDC20, NDC80, NEDD1, PSMC6, NOLC1, PSMC4, PLK1, PSMC3, POLD1, PSMC2, UBA3…
GO:0007049~cell cycle	192	7.9635	1.06119e-13	1.97575e-10	KIFC1, SEPT2, ZAK, TUBB2B, PRC1, TUBB2A, DTYMK, TTK, AURKA, AURKB, CDC16, TTN, CTNNB1, CUL3, CUL2, TARDBP, ILK, VPS4B, VPS4A, H2AFX, TUBG1, CCNA2, RPS27A, ZC3HC1, ANAPC5, RAN, CHTF8, LIG3, TBRG4, SKP1, PPP1CC, MYH9, DCTN1, NCAPD3, NCAPD2, DCTN2, PA2G4, PPP1CA, RCC2, PSMA4, NEK9, PELO, ANAPC7, PDCD6IP, SEPT6, DST, SEPT7, SEPT8, SEPT9, PPP2R3B, FZR1, BLM, MRE11A, KATNB1, DMWD, CHEK1, CHEK2, CALR, I…
GO:0043623~cellular protein complex assembly	63	2.61302	1.63785e-13	3.04834e-10	NDUFAF4, XPO1, OXA1L, COX11, WASF3, TUBB2B, TUBB2A, AP2S1, WASF1, TTN, NDUFAF3, NDUFS7, NDUFS5, PICALM, NDUFS4, NDUFS8, TUBB6, TUBB8, TUBG1, TUBA1A, TUBA1B, KPNB1, TUBB3, COX15, ARL2, HSP90AA1, PICK1, TMEM70, IPO9, IPO8, CDK5, FLNA, ADRM1, IPO7, IPO4, NUP205, IPO5, TUBA4A, TOMM22, NUP98, SAMM50, FKBP4, ARPC4, CALR, PXN, TFAM, TUBB, CSE1L, FGB, RAC1, HSPA4, AGRN, NEFL, TNPO1, SCO2, SCO1, SRP54, TC…
GO:0006839~mitochondrial transport	37	1.53463	3.74029e-13	6.96254e-10	ATP5D, GRPEL2, YWHAZ, GRPEL1, CPT2, MTX3, MTX2, MTX1, TIMM17B, TIMM10, TIMM13, MIPEP, TOMM7, SLC1A3, TOMM5, TIMM9, SLC25A1, ATP5O, DNAJC19, HSP90AA1, SLC25A6, TP53, TOMM40, TIMM23, TIMM44, TIMM8B, TIMM8A, SLC25A12, PPIF, TRNT1, MFN2, SLC25A13, TOMM70A, SLC25A10, BAX, TOMM20, TOMM22
GO:0006399~tRNA metabolic process	51	2.1153	3.87051e-13	7.20435e-10	TARS2, VARS2, NARS, TRMT1, QARS, IARS2, WARS, NARS2, CTU2, POLG2, MTO1, YARS, CARS, GTPBP3, DARS, AARS, DARS2, SARS2, EARS2, TARS, TRMT11, RARS, HARS, FARSB, YARS2, FARSA, AARS2, HSD17B10, ELAC2, PUS1, FARS2, WARS2, VARS, KARS, IARS, HARS2, LARS, MARS2, KIAA0391, NSUN2, MARS, TRMU, AIMP1, RARS2, GARS, EPRS, SSB, LARS2, FBL, TRNT1, CARS2
GO:0022402~cell cycle process	149	6.18001	4.80682e-13	8.94862e-10	KIFC1, SEPT2, TUBB2B, ZAK, PRC1, TUBB2A, TTK, AURKA, AURKB, CDC16, TTN, CTNNB1, CUL3, CUL2, TARDBP, ILK, H2AFX, TUBG1, CCNA2, RPS27A, ZC3HC1, ANAPC5, RAN, LIG3, TBRG4, SKP1, MYH9, DCTN1, NCAPD3, NCAPD2, DCTN2, PA2G4, RCC2, PSMA4, NEK9, ANAPC7, DST, SEPT7, PPP2R3B, FZR1, BLM, MRE11A, KATNB1, CHEK1, DMWD, CALR, ITGB1, TUBB, MACF1, NCAPG2, KATNA1, CDC123, NPM1, SKA3, CLASP1, CLASP2, TCF3, TAF2, CKAP…
GO:0006626~protein targeting to mitochondrion	24	0.995438	4.18107e-12	7.78302e-09	GRPEL2, GRPEL1, YWHAZ, MTX3, MTX2, TIMM17B, MTX1, TIMM10, TOMM40, TIMM13, MIPEP, TIMM23, TIMM44, TIMM8B, TIMM8A, MFN2, TRNT1, TOMM7, TOMM70A, TOMM5, TIMM9, TOMM20, TOMM22, DNAJC19
GO:0070585~protein localization in mitochondrion	24	0.995438	4.18107e-12	7.78302e-09	GRPEL2, GRPEL1, YWHAZ, MTX3, MTX2, TIMM17B, MTX1, TIMM10, TOMM40, TIMM13, MIPEP, TIMM23, TIMM44, TIMM8B, TIMM8A, MFN2, TRNT1, TOMM7, TOMM70A, TOMM5, TIMM9, TOMM20, TOMM22, DNAJC19
GO:0006732~coenzyme metabolic process	58	2.40564	5.6872e-12	1.05866e-08	NAMPT, LDHB, PGD, ACOT2, ALDH1L2, MTHFD1L, HIBADH, PDHB, ACOT9, MTHFD1, MTHFD2, GPX1, GSR, ACOT8, IDH3G, SUCLA2, ACO2, ALDH5A1, SUCLG2, SUCLG1, COQ9, COQ7, COQ5, COQ6, PANK4, HAGH, NNT, G6PD, DLD, FLAD1, MDH2, COASY, GCLC, NFS1, GCLM, PDSS1, PDSS2, MTHFS, TPI1, GSTK1, IDH2, DCAKD, FH, DLST, CS, ACACA, IDH3B, ACLY, DLAT, IDH3A, SOD2, SDHA, DBT, SDHB, MLYCD, SDHC, SDHD, DCXR
GO:0009060~aerobic respiration	24	0.995438	1.0483e-11	1.95138e-08	UQCRC2, DLST, OXA1L, UQCRC1, ACO2, SUCLG2, SUCLG1, CS, IDH3B, PDHB, IDH3A, SDHA, SDHB, NNT, IDH3G, UQCRH, SDHC, SDHD, IDH2, CAT, SUCLA2, MDH2, UQCRB, FH
GO:0006084~acetyl-CoA metabolic process	22	0.912484	3.5119e-11	6.53733e-08	DLST, ACO2, SUCLG2, SUCLG1, CS, ACACA, IDH3B, DLAT, PDHB, IDH3A, SDHA, SDHB, NNT, IDH3G, MLYCD, SDHC, SDHD, DLD, IDH2, SUCLA2, MDH2, FH
GO:0051186~cofactor metabolic process	66	2.73745	5.74113e-11	1.0687e-07	NAMPT, LDHB, PGD, ACOT2, PPOX, ALDH1L2, PDHB, MTHFD1L, HIBADH, ACOT9, MTHFD1, GSR, MTHFD2, HMOX2, GPX1, ACOT8, IDH3G, CPOX, MCCC1, SUCLA2, COX15, FECH, ACO2, ALDH5A1, SUCLG2, SUCLG1, COQ9, COQ7, COQ5, COQ6, HAGH, PANK4, NNT, G6PD, DLD, FLAD1, MDH2, COASY, GCLC, NFS1, RSAD1, GCLM, PDSS1, PDSS2, MTHFS, TPI1, GSTK1, IDH2, DCAKD, FH, DLST, CS, ACACA, IDH3B, ACLY, DLAT, MMAB, IDH3A, SOD2, SDHA, SDHB, …
GO:0048285~organelle fission	73	3.02779	1.15124e-10	2.143e-07	KIF23, KIFC1, KIF22, SEPT2, TUBB2B, TUBB2A, AURKA, CDC16, AURKB, TTN, FAM83D, KIF2C, TARDBP, CCNA2, TUBB3, CDK1, CCNK, ARHGEF2, OPA1, KIF11, ZC3HC1, ANAPC5, RAN, TPX2, NCAPD3, DCTN1, CDK2, NCAPD2, DCTN2, RCC2, NEK9, MAPRE2, RUVBL1, HAUS8, ANAPC7, SEPT7, HAUS3, FZR1, HAUS5, USP9X, KATNB1, CEP55, FIS1, TUBB, NCAPH, NUMA1, NCAPG, NCAPG2, KATNA1, SKA3, CLASP1, CLASP2, APC, DNM1L, PDS5A, CKAP5, NUF2, …
GO:0034660~ncRNA metabolic process	73	3.02779	1.43733e-10	2.67556e-07	NAF1, TARS2, VARS2, NARS, UTP18, QARS, TRMT1, IARS2, WARS, DKC1, NARS2, INTS7, CTU2, TFB2M, POLG2, FTSJ3, MTO1, KRR1, CARS, YARS, EXOSC9, GTPBP3, DARS, AARS, DARS2, SARS2, EARS2, TARS, EIF4A3, PA2G4, NOP2, TRMT11, RARS, HARS, FARSB, YARS2, FARSA, TFB1M, AARS2, HSD17B10, ELAC2, PUS1, FARS2, WARS2, VARS, KARS, IARS, EXOSC10, HARS2, LARS, MARS2, KIAA0391, NSUN2, RPS24, MARS, TRMU, TBL3, RARS2, AIMP1…
GO:0006099~tricarboxylic acid cycle	18	0.746578	3.14752e-10	5.85903e-07	DLST, ACO2, SUCLG2, SUCLG1, CS, IDH3B, PDHB, IDH3A, SDHA, SDHB, NNT, IDH3G, SDHC, SDHD, IDH2, SUCLA2, MDH2, FH
GO:0046356~acetyl-CoA catabolic process	18	0.746578	3.14752e-10	5.85903e-07	DLST, ACO2, SUCLG2, SUCLG1, CS, IDH3B, PDHB, IDH3A, SDHA, SDHB, NNT, IDH3G, SDHC, SDHD, IDH2, SUCLA2, MDH2, FH
GO:0051301~cell division	86	3.56698	3.63679e-10	6.76979e-07	KIF23, KIFC1, SEPT2, PRC1, CDC14A, TSG101, CDC16, AURKB, SENP5, FAM83D, CDC42, ATAD3B, VPS4B, VPS4A, CCNA2, CABLES1, CDC7, CDK1, ARHGEF2, CCNK, KIF11, ZC3HC1, ANAPC5, RAN, LIG3, MYH9, PPP1CC, CDK5, NCAPD3, CDK2, MCM5, NCAPD2, PPP1CA, RCC2, CFL1, NEK9, MAPRE2, PELO, PDCD6IP, HAUS8, ANAPC7, RUVBL1, SEPT6, SEPT7, SEPT9, HAUS3, FZR1, PARD3, HAUS5, DIAPH2, USP9X, KATNB1, CEP55, NCAPH, NCAPG, NCAPG2, K…
GO:0009109~coenzyme catabolic process	19	0.788055	5.30111e-10	9.8679e-07	DLST, ACO2, SUCLG2, SUCLG1, CS, IDH3B, ALDH1L2, PDHB, IDH3A, SDHA, SDHB, NNT, IDH3G, SDHC, SDHD, IDH2, SUCLA2, MDH2, FH
GO:0007067~mitosis	69	2.86188	8.53929e-10	1.58957e-06	KIF23, KIFC1, KIF22, SEPT2, TUBB2B, TUBB2A, AURKA, CDC16, AURKB, TTN, FAM83D, KIF2C, TARDBP, CCNA2, TUBB3, CDK1, CCNK, ARHGEF2, KIF11, ZC3HC1, ANAPC5, RAN, TPX2, NCAPD3, DCTN1, CDK2, NCAPD2, DCTN2, RCC2, NEK9, MAPRE2, RUVBL1, HAUS8, ANAPC7, SEPT7, HAUS3, FZR1, HAUS5, USP9X, KATNB1, CEP55, TUBB, NCAPH, NUMA1, NCAPG, NCAPG2, KATNA1, SKA3, CLASP1, CLASP2, APC, PDS5A, CKAP5, NUF2, CDC23, CENPF, CDC20…
GO:0000280~nuclear division	69	2.86188	8.53929e-10	1.58957e-06	KIF23, KIFC1, KIF22, SEPT2, TUBB2B, TUBB2A, AURKA, CDC16, AURKB, TTN, FAM83D, KIF2C, TARDBP, CCNA2, TUBB3, CDK1, CCNK, ARHGEF2, KIF11, ZC3HC1, ANAPC5, RAN, TPX2, NCAPD3, DCTN1, CDK2, NCAPD2, DCTN2, RCC2, NEK9, MAPRE2, RUVBL1, HAUS8, ANAPC7, SEPT7, HAUS3, FZR1, HAUS5, USP9X, KATNB1, CEP55, TUBB, NCAPH, NUMA1, NCAPG, NCAPG2, KATNA1, SKA3, CLASP1, CLASP2, APC, PDS5A, CKAP5, NUF2, CDC23, CENPF, CDC20…
GO:0000087~M phase of mitotic cell cycle	69	2.86188	1.98786e-09	3.70035e-06	KIF23, KIFC1, KIF22, SEPT2, TUBB2B, TUBB2A, AURKA, CDC16, AURKB, TTN, FAM83D, KIF2C, TARDBP, CCNA2, TUBB3, CDK1, CCNK, ARHGEF2, KIF11, ZC3HC1, ANAPC5, RAN, TPX2, NCAPD3, DCTN1, CDK2, NCAPD2, DCTN2, RCC2, NEK9, MAPRE2, RUVBL1, HAUS8, ANAPC7, SEPT7, HAUS3, FZR1, HAUS5, USP9X, KATNB1, CEP55, TUBB, NCAPH, NUMA1, NCAPG, NCAPG2, KATNA1, SKA3, CLASP1, CLASP2, APC, PDS5A, CKAP5, NUF2, CDC23, CENPF, CDC20…
GO:0000279~M phase	91	3.77437	2.03844e-09	3.79451e-06	KIF23, KIFC1, KIF22, SEPT2, PRC1, TUBB2B, TUBB2A, TTK, AURKA, CDC16, AURKB, TTN, FAM83D, KIF2C, TARDBP, H2AFX, RANBP1, TUBG1, DYNC1H1, CCNA2, TUBB3, CDK1, ARHGEF2, CCNK, KIF11, ZC3HC1, ANAPC5, RAN, LIG3, TPX2, MYH9, RAD50, NCAPD3, DCTN1, CDK2, NCAPD2, DCTN2, RCC2, TOP3A, NEK9, MAPRE2, RUVBL1, HAUS8, ANAPC7, KPNA2, SEPT7, HAUS3, FZR1, HAUS5, MRE11A, USP9X, KATNB1, CHEK1, DMWD, CEP55, RPA1, NCAPH, …
GO:0022403~cell cycle phase	108	4.47947	2.07636e-09	3.86509e-06	KIFC1, SEPT2, PRC1, TUBB2B, TUBB2A, TTK, AURKA, AURKB, CDC16, TTN, CUL3, CUL2, TARDBP, H2AFX, TUBG1, CCNA2, ZC3HC1, ANAPC5, RAN, LIG3, TBRG4, MYH9, DCTN1, NCAPD3, NCAPD2, DCTN2, RCC2, NEK9, ANAPC7, SEPT7, FZR1, PPP2R3B, BLM, MRE11A, KATNB1, CHEK1, DMWD, ITGB1, TUBB, NCAPG2, KATNA1, CDC123, SKA3, CLASP1, CLASP2, TCF3, TAF2, CKAP5, PCNT, NUF2, CDC23, CDC20, NDC80, ATM, NEDD1, NOLC1, PLK1, POLD1, SM…
GO:0045454~cell redox homeostasis	30	1.2443	3.29915e-09	6.1413e-06	TMX1, GLRX5, GCLC, PTGES2, PDIA3, TMX3, DNAJC10, PRDX4, PDIA6, PRDX5, PDIA5, NHLRC2, PRDX2, PRDX3, PDIA4, PRDX1, GPX1, GSR, QSOX2, QSOX1, SCO2, P4HB, AIFM1, ERP44, NXN, PRDX6, TXNDC5, TXN, DLD, TXNRD2
GO:0051187~cofactor catabolic process	20	0.829531	3.85532e-09	7.17659e-06	DLST, ACO2, SUCLG2, SUCLG1, CS, IDH3B, ALDH1L2, PDHB, IDH3A, SDHA, HMOX2, SDHB, NNT, IDH3G, SDHC, SDHD, IDH2, SUCLA2, MDH2, FH
GO:0010608~posttranscriptional regulation of gene expression	64	2.6545	1.57375e-08	2.92949e-05	SRP14, EIF5, EIF5B, SYNCRIP, EIF5A, EIF2A, AURKA, YBX1, APOA2, APOA1, SND1, PUM1, EIF2B3, DNAJC1, EIF2B4, EIF2B5, GTPBP4, NDUFA13, PRKCD, FLNA, HNRNPU, EIF4G1, EIF4G2, EIF4A3, PA2G4, EIF4A2, EIF2S1, SERBP1, HSPB1, CELF1, EEFSEC, SRP9, PRKDC, IGF2BP1, IGF2BP2, IGF2BP3, MTIF2, CALR, SRRT, ZFP36L2, MOV10, STX12, EIF3B, EIF3H, EIF3E, PRKRA, EIF3K, HNRNPD, PABPC1, DNAJA3, FBXO7, DHX9, UPF1, PAIP1, DDX…
GO:0010498~proteasomal protein catabolic process	39	1.61759	1.90206e-08	3.54064e-05	RAD23B, DERL2, KIAA0368, RAD23A, CDC16, STUB1, CUL3, USP19, PSMD2, PSMD3, PSMD4, PSMD5, PSMD6, PSMD7, RPS27A, CDK1, NPLOC4, ANAPC5, ERLIN2, CDC23, CDC20, ERLIN1, CCNB1, PSMC6, PSMD14, HSP90B1, PSMD13, SEC61B, PSMC4, VCP, PSMD12, PSMC3, PSMD11, PSMC2, PSMA4, PSMC1, PSME3, ANAPC7, FAF1
GO:0043161~proteasomal ubiquitin-dependent protein catabolic process	39	1.61759	1.90206e-08	3.54064e-05	RAD23B, DERL2, KIAA0368, RAD23A, CDC16, STUB1, CUL3, USP19, PSMD2, PSMD3, PSMD4, PSMD5, PSMD6, PSMD7, RPS27A, CDK1, NPLOC4, ANAPC5, ERLIN2, CDC23, CDC20, ERLIN1, CCNB1, PSMC6, PSMD14, HSP90B1, PSMD13, SEC61B, PSMC4, VCP, PSMD12, PSMC3, PSMD11, PSMC2, PSMA4, PSMC1, PSME3, ANAPC7, FAF1
GO:0007010~cytoskeleton organization	109	4.52095	2.12246e-08	3.95092e-05	PDLIM7, PRC1, CAPZA1, S100A9, LMO7, TTK, CNP, AURKA, TTN, PRKG1, CTNNB1, PACSIN2, ANK3, RALA, TUBG1, PLS3, ACTN4, RAN, ACTN1, MYH9, DCTN2, ATP2C1, FGFR1OP, TESK2, DBN1, DST, ADD1, ALDOA, PALM, DIAPH2, ARF6, ARPC4, CALR, ITGB1, LLGL1, PFN1, TUBB, KRAS, MACF1, KATNA1, DMD, NPM1, RAC1, CLASP1, EPB41, CKAP5, PCNT, FSCN1, NDC80, DOCK7, CORO1A, SMC1A, DNAJB6, RANBP10, MYH10, KIF23, LIMA1, WASF3, WASF1,…
GO:0051351~positive regulation of ligase activity	31	1.28577	4.49961e-08	8.37593e-05	XRCC4, FZR1, CDC16, GCLM, PSMD2, PSMD3, PSMD4, PSMD5, PSMD6, PSMD7, RPS27A, CDK1, ANAPC5, CDC23, CDC20, SKP1, UBE2N, CCNB1, PSMD14, PSMC6, PSMD13, PSMD12, PSMC4, PSMD11, PLK1, PSMC3, PSMC2, PSMA4, PSMC1, PSME3, ANAPC7
GO:0009260~ribonucleotide biosynthetic process	43	1.78349	8.40637e-08	0.000156483	ATP5D, ALDOA, ATP1B1, ATP1B3, ATP5B, ATP6AP1, PRKAG2, ATP6V1B2, PPAT, ATP2B1, ATP2B4, ATIC, DHODH, ATP5L, ATP5O, ATP6V0D1, ATP5I, ATP5H, IMPDH1, IMPDH2, ATP5J, ATP5F1, AK3, ATP6V1H, ATP1A1, ATP11C, GMPS, GART, NME6, NME4, ATP6V1A, UMPS, NME3, SLC25A13, ATP13A1, NME1-NME2, ATP2A2, ATP2C1, ATP5C1, ADSL, ATP5A1, PAICS, PRPS1
GO:0006890~retrograde vesicle-mediated transport, Golgi to ER	15	0.622148	9.88685e-08	0.000184041	ARFGAP1, COPA, PICK1, COPZ1, RER1, TAPBP, COPB2, SCFD1, COPG2, COG7, GBF1, COPB1, ARCN1, RAB6B, COPE
GO:0009150~purine ribonucleotide metabolic process	46	1.90792	1.05645e-07	0.000196655	ATP5D, ALDOA, ATP1B1, ATP1B3, FIGNL1, ATP5B, ATP6AP1, PRKAG2, ATP6V1B2, PPAT, ATP2B1, LONP1, ATP2B4, ATIC, VPS4B, ATP5L, ATP5O, ATP6V0D1, ATP5I, ATP5H, IMPDH1, NDUFS1, IMPDH2, ATP5J, ATP5F1, AK3, ATP6V1H, ACLY, ATP1A1, ATP11C, GMPS, GART, NME6, NME4, ATP6V1A, NME3, SLC25A13, ATP13A1, NME1-NME2, ATP2A2, ATP2C1, ATP5C1, ADSL, ATP5A1, PAICS, PRPS1
GO:0009259~ribonucleotide metabolic process	48	1.99088	1.08791e-07	0.000202512	ATP5D, ALDOA, ATP1B1, ATP1B3, FIGNL1, ATP5B, ATP6AP1, PRKAG2, ATP6V1B2, PPAT, ATP2B1, LONP1, ATP2B4, ATIC, VPS4B, DHODH, ATP5L, ATP5O, ATP6V0D1, ATP5I, ATP5H, IMPDH1, NDUFS1, IMPDH2, ATP5J, ATP5F1, AK3, ATP6V1H, ACLY, ATP1A1, ATP11C, GMPS, GART, NME6, NME4, ATP6V1A, UMPS, NME3, SLC25A13, ATP13A1, NME1-NME2, ATP2A2, ATP2C1, ATP5C1, ADSL, ATP5A1, PAICS, PRPS1
GO:0007264~small GTPase mediated signal transduction	81	3.3596	1.16234e-07	0.000216366	RAB9A, RAB5B, RAB5C, WASF2, RAB1B, IQGAP2, SHOC2, RAB1A, IQGAP1, CDC42, APOA1, ARHGAP1, RALB, RHOA, RAB23, RALA, RRAS, RAB6B, SHC1, RAB6A, SAR1A, RHOG, RAB21, DHCR24, GTPBP2, RAP2B, ARL2, RAP2A, ARL1, RAP2C, ARHGEF7, RAB4A, G3BP1, G3BP2, RAB18, GNB1, RRAS2, CFL1, COL1A2, RAB5A, RAB14, RAB13, ARL8B, RAB10, NKIRAS2, RAB3A, RAB7A, RAB3B, RALGPS2, ARFRP1, RTKN, ARF6, RRAGC, KRAS, CDC42EP1, RAC1, RAB1…
GO:0009152~purine ribonucleotide biosynthetic process	41	1.70054	1.2749e-07	0.00023732	ATP5D, ALDOA, ATP1B1, ATP1B3, ATP5B, ATP6AP1, PRKAG2, ATP6V1B2, PPAT, ATP2B1, ATP2B4, ATIC, ATP5L, ATP5O, ATP6V0D1, ATP5I, ATP5H, IMPDH1, IMPDH2, ATP5J, ATP5F1, AK3, ATP6V1H, ATP1A1, ATP11C, GMPS, GART, NME6, NME4, ATP6V1A, NME3, SLC25A13, ATP13A1, NME1-NME2, ATP2A2, ATP2C1, ATP5C1, ADSL, ATP5A1, PAICS, PRPS1
GO:0006793~phosphorus metabolic process	203	8.41974	1.38206e-07	0.000257267	PDP1, AURKA, AURKB, PRKG1, MAP3K7, COL4A3BP, ILK, MAP2K7, SYK, PTPRF, PPP1CA, BAZ1B, EIF2S1, DLD, ATP5C1, MAPK9, NEK9, EIF2AK2, NEK7, PPP2R3B, ENPP1, CHEK1, CHEK2, VRK1, VRK2, VRK3, GPD2, MAP2K2, MAP2K4, PPA2, ATM, PTPN11, GK, ATP5D, BCKDK, ATP5B, EIF2A, RNGTT, CAMKK2, HSF1, ATP5L, ATP5O, BRD4, ATP5I, GOLGA5, ATP6V0D1, ATP5H, ATP5J, COX15, CDC7, MINPP1, SRPK2, NDUFB10, ADAM10, LYN, PIK3C2A, PI4KA…
GO:0006796~phosphate metabolic process	203	8.41974	1.38206e-07	0.000257267	PDP1, AURKA, AURKB, PRKG1, MAP3K7, COL4A3BP, ILK, MAP2K7, SYK, PTPRF, PPP1CA, BAZ1B, EIF2S1, DLD, ATP5C1, MAPK9, NEK9, EIF2AK2, NEK7, PPP2R3B, ENPP1, CHEK1, CHEK2, VRK1, VRK2, VRK3, GPD2, MAP2K2, MAP2K4, PPA2, ATM, PTPN11, GK, ATP5D, BCKDK, ATP5B, EIF2A, RNGTT, CAMKK2, HSF1, ATP5L, ATP5O, BRD4, ATP5I, GOLGA5, ATP6V0D1, ATP5H, ATP5J, COX15, CDC7, MINPP1, SRPK2, NDUFB10, ADAM10, LYN, PIK3C2A, PI4KA…
GO:0006260~DNA replication	57	2.36416	1.58455e-07	0.000294961	NAP1L1, CDT1, PRIM1, MCM7, DKC1, PRIM2, POLG2, TOP2A, CDC7, RBBP4, SSBP1, POLG, CHTF8, LIG3, MCM2, MCM3, RBBP7, MCM4, RAD50, MCM5, CDK2, MCM6, PURA, RFC5, RFC3, RFC4, RFC1, RFC2, TOP3A, HMGB1, TMX1, NUP98, HMGB2, BLM, MRE11A, CHEK1, POLA2, RPA1, TFAM, POLE2, POLE3, DNAJA3, FEN1, SSRP1, UPF1, NASP, PHB, CENPF, POLD3, POLD1, POLD2, PCNA, SUPT16H, CHTF18, RBM14, CHAF1B, REPIN1
GO:0006261~DNA-dependent DNA replication	26	1.07839	1.95934e-07	0.000364727	HMGB1, HMGB2, BLM, RPA1, PRIM1, TFAM, MCM7, POLE2, PRIM2, POLG2, DNAJA3, FEN1, POLG, MCM2, MCM3, MCM4, MCM5, PURA, MCM6, POLD3, RFC3, RFC4, RFC1, POLD1, POLD2, TOP3A
GO:0051248~negative regulation of protein metabolic process	56	2.32269	2.20112e-07	0.000409733	HSP90AB1, SRP14, CDC16, MEN1, SERPINA5, RAB23, PSMD2, PSMD3, PSMD4, PSMD5, PSMD6, EIF2B3, PSMD7, DNAJC1, RPS27A, EIF2B4, EIF2B5, PPP2R1A, GTPBP4, ANAPC5, RELA, NDUFA13, CDK5, PRKCD, FLNA, EIF4A3, G6PD, PSMA4, PSME3, ANAPC7, SRP9, FZR1, GCLC, ENPP1, IGF2BP1, IGF2BP2, IGF2BP3, CALR, ITGAV, EIF3E, NF2, YWHAB, CDC23, CDC20, YWHAE, PSMC6, PSMD14, PSMD13, PSMD12, PSMC4, PSMC3, PSMD11, PSMC2, BAX, PSMC1…
GO:0051443~positive regulation of ubiquitin-protein ligase activity	29	1.20282	2.48161e-07	0.000461946	FZR1, CDC16, PSMD2, PSMD3, PSMD4, PSMD5, PSMD6, PSMD7, RPS27A, CDK1, ANAPC5, CDC23, CDC20, SKP1, UBE2N, CCNB1, PSMD14, PSMC6, PSMD13, PSMD12, PSMC4, PSMD11, PLK1, PSMC3, PSMA4, PSMC2, PSMC1, PSME3, ANAPC7
GO:0016310~phosphorylation	171	7.09249	3.10899e-07	0.00057873	NRBP1, ZAK, ATP6AP1, NDUFAB1, TTK, AURKA, AURKB, PRKG1, TTN, PRKACG, MAP3K7, UQCR10, CSNK2A1, UQCR11, COL4A3BP, ILK, STK39, PRKACA, MAP2K7, SYK, TWF1, STK25, STK24, PICK1, MAP4K4, BAZ1B, RIOK3, EIF2S1, DLD, ATP5C1, MAPK9, NEK9, TESK2, EIF2AK2, NEK7, MAPKAPK5, PTK7, CHEK1, CHEK2, ATP6V1B2, RIOK2, VRK1, VRK2, VRK3, PRKRA, MAP2K2, MAP2K4, AK3, ATM, PTPN11, NDUFV3, PLK1, NDUFV1, ULK3, NDUFV2, SPTBN1,…
GO:0032269~negative regulation of cellular protein metabolic process	54	2.23973	3.49688e-07	0.000650935	HSP90AB1, SRP14, CDC16, MEN1, SERPINA5, RAB23, PSMD2, PSMD3, PSMD4, PSMD5, PSMD6, EIF2B3, PSMD7, EIF2B4, RPS27A, DNAJC1, EIF2B5, PPP2R1A, GTPBP4, ANAPC5, NDUFA13, CDK5, PRKCD, EIF4A3, G6PD, PSMA4, PSME3, ANAPC7, SRP9, FZR1, GCLC, ENPP1, IGF2BP1, IGF2BP2, IGF2BP3, CALR, ITGAV, EIF3E, NF2, YWHAB, CDC23, CDC20, YWHAE, PSMC6, PSMD14, PSMD13, PSMD12, PSMC4, PSMC3, PSMD11, PSMC2, BAX, PSMC1, IGFBP5
GO:0006413~translational initiation	22	0.912484	3.64274e-07	0.000678085	PAIP1, EIF5, EIF2S3, MTIF2, EIF3D, EIF3CL, EIF3A, EIF3B, EIF3G, EIF3H, EIF3E, EIF3F, EIF2S2, EIF1AY, EIF3K, EIF3L, EIF3I, EIF3J, EIF2B3, EIF3M, EIF2B4, EIF2B5
GO:0006888~ER to Golgi vesicle-mediated transport	21	0.871008	4.58969e-07	0.000854356	SEC23A, RAB2A, TMX1, NRBP1, SEC31A, ATL2, ATL3, USE1, LMAN1, ERGIC1, ERGIC2, PREB, VCP, STX18, SEC22A, SEC13, SEC22B, GOSR1, SEC24C, SAR1A, SEC23B
GO:0007006~mitochondrial membrane organization	18	0.746578	4.61653e-07	0.000859354	OPA1, HSP90AA1, DNM1L, SAMM50, TP53, TIMM10, PEX5, TIMM50, TIMM13, TIMM8B, TIMM8A, MFN2, PPIF, LETM1, BAX, TIMM9, HSPA4, TOMM22
GO:0051437~positive regulation of ubiquitin-protein ligase activity during mitotic cell cycle	28	1.16134	4.83436e-07	0.000899901	FZR1, CDC16, PSMD2, PSMD3, PSMD4, PSMD5, PSMD6, PSMD7, RPS27A, CDK1, ANAPC5, CDC23, CDC20, SKP1, CCNB1, PSMD14, PSMC6, PSMD13, PSMD12, PSMC4, PSMD11, PLK1, PSMC3, PSMA4, PSMC2, PSMC1, PSME3, ANAPC7
GO:0030036~actin cytoskeleton organization	63	2.61302	5.85029e-07	0.00108901	LIMA1, PDLIM7, WASF3, WASF1, WASF2, S100A9, CAPZA1, FERMT2, LMO7, PRKG1, TTN, CDC42, PAK2, PACSIN2, RHOA, RALA, CAP1, PLS3, FMNL2, ARHGEF2, ACTN4, PRKCI, ACTN1, MYH9, CDK5, FLNB, FLNA, EPB41L2, EPB41L3, ATP2C1, CFL1, TESK2, WASL, DBN1, DST, LCP1, ADD1, ALDOA, TRIOBP, DIAPH2, CALD1, ABI2, ARF6, ARPC4, CALR, TPM1, ITGB1, LLGL1, PFN1, KRAS, EZR, RAC1, TRIP10, ACTC1, EPB41, NF2, FSCN1, RACGAP1, PPP1R…
GO:0051340~regulation of ligase activity	31	1.28577	6.75762e-07	0.00125791	XRCC4, FZR1, CDC16, GCLM, PSMD2, PSMD3, PSMD4, PSMD5, PSMD6, PSMD7, RPS27A, CDK1, ANAPC5, CDC23, CDC20, SKP1, UBE2N, CCNB1, PSMD14, PSMC6, PSMD13, PSMD12, PSMC4, PSMD11, PLK1, PSMC3, PSMC2, PSMA4, PSMC1, PSME3, ANAPC7
GO:0006612~protein targeting to membrane	18	0.746578	8.20749e-07	0.00152779	SRP14, SRP54, PRKCI, TIMM10, ICMT, PEX3, TIMM13, SEC62, SEC63, TIMM8B, SSR1, TIMM8A, MACF1, TIMM9, SRP72, SSR2, SRP9, SSR3
GO:0022613~ribonucleoprotein complex biogenesis	53	2.19826	8.59387e-07	0.00159972	NAF1, CRNKL1, UTP18, SNRPD3, GTPBP10, SNRPD1, EIF2A, GNL3L, DKC1, PRMT5, TFB2M, DDX20, GNL2, FTSJ3, SRPK2, KRR1, PRPF31, GTPBP4, EXOSC9, BYSL, SF1, SMN1, MRTO4, PRPF6, EIF4A3, PA2G4, NOP2, SNRNP200, SNRPB, CELF1, TFB1M, SNRPF, SNRPE, EXOSC10, EIF3A, NPM1, USP39, AATF, GEMIN7, GEMIN5, RPS24, TBL3, DDX1, HEATR1, SF3A2, FBL, SF3A3, DIS3, PHAX, NOLC1, NOP58, NOP56, PES1
GO:0006006~glucose metabolic process	47	1.9494	1.07128e-06	0.00199414	ALDOA, LDHB, LDHA, PHKB, ADPGK, SLC37A4, PGD, PRKAG2, PGAM1, UGDH, HK2, HK1, OGDH, PDHB, HIBADH, UEVLD, TPI1, PRKAA1, PDHA1, DHTKD1, GAPDH, ENO1, GPD2, PDK1, PDK2, WDTC1, AIMP1, PFKL, ALDH5A1, PDK3, DLAT, PFKM, PCK2, PPP1CC, PGM2L1, PGM2, PGM3, GPI, PPP1CA, G6PD, PYGL, SLC25A10, PGM1, DCXR, MDH2, UGP2, PC
GO:0051439~regulation of ubiquitin-protein ligase activity during mitotic cell cycle	28	1.16134	1.32619e-06	0.00246864	FZR1, CDC16, PSMD2, PSMD3, PSMD4, PSMD5, PSMD6, PSMD7, RPS27A, CDK1, ANAPC5, CDC23, CDC20, SKP1, CCNB1, PSMD14, PSMC6, PSMD13, PSMD12, PSMC4, PSMD11, PLK1, PSMC3, PSMA4, PSMC2, PSMC1, PSME3, ANAPC7
GO:0030029~actin filament-based process	65	2.69598	1.33253e-06	0.00248044	LIMA1, PDLIM7, WASF3, WASF1, WASF2, S100A9, CAPZA1, FERMT2, LMO7, PRKG1, TTN, CDC42, PAK2, PACSIN2, RHOA, RALA, CAP1, PLS3, FMNL2, ARHGEF2, MYO6, ACTN4, PRKCI, ACTN1, MYH9, CDK5, FLNB, FLNA, EPB41L2, EPB41L3, ATP2C1, CFL1, TESK2, WASL, DBN1, DST, LCP1, ADD1, ALDOA, MYL6, TRIOBP, DIAPH2, CALD1, ABI2, ARF6, ARPC4, CALR, TPM1, ITGB1, LLGL1, PFN1, KRAS, EZR, RAC1, TRIP10, ACTC1, EPB41, NF2, FSCN1, RA…
GO:0031398~positive regulation of protein ubiquitination	31	1.28577	1.6482e-06	0.00306804	FZR1, CDC16, STUB1, PSMD2, PSMD3, PSMD4, PSMD5, PSMD6, PSMD7, RPS27A, DNAJA3, CDK1, ANAPC5, CDC23, CDC20, SKP1, UBE2N, CCNB1, PSMD14, PSMC6, PSMD13, PSMD12, PSMC4, PSMD11, PLK1, PSMC3, PSMC2, PSMA4, PSMC1, PSME3, ANAPC7
GO:0007017~microtubule-based process	67	2.77893	1.80012e-06	0.00335083	KIF23, KIF22, KIFC1, SPG7, PRC1, TUBB2B, TUBB2A, TTK, AURKA, CNP, GTSE1, CTNNB1, KIF2C, DYNLL2, TUBB6, RANBP1, TUBB8, TUBG1, DYNC1H1, TUBA1A, TUBA1B, TUBB3, KIF2A, KIF14, OPA1, KIF11, KIF5B, RAN, TBCE, KTN1, MYH9, DCTN2, SASS6, FGFR1OP, TUBA4A, HAUS8, KPNA2, DST, LRPPRC, DYNC1I2, HAUS3, HAUS5, DNAH17, ARPC4, KLC2, TUBGCP4, TUBB, MACF1, KLC1, KATNA1, NPM1, CLASP1, NEFL, NEFM, CKAP5, PCNT, MAP1B, D…
GO:0051438~regulation of ubiquitin-protein ligase activity	29	1.20282	3.23425e-06	0.00602031	FZR1, CDC16, PSMD2, PSMD3, PSMD4, PSMD5, PSMD6, PSMD7, RPS27A, CDK1, ANAPC5, CDC23, CDC20, SKP1, UBE2N, CCNB1, PSMD14, PSMC6, PSMD13, PSMD12, PSMC4, PSMD11, PLK1, PSMC3, PSMA4, PSMC2, PSMC1, PSME3, ANAPC7
GO:0006892~post-Golgi vesicle-mediated transport	24	0.995438	3.45585e-06	0.00643279	SCAMP1, STX4, AP1M1, CLTA, SCAMP3, SCAMP2, STX7, AP1B1, NAPA, CLTC, DTNBP1, SCFD1, GBF1, AP2A1, ARRB1, TXNDC5, PUM1, RAB14, VPS13A, SNAP23, EXOC5, CLINT1, HSPA8, DNM2
GO:0006007~glucose catabolic process	24	0.995438	3.45585e-06	0.00643279	ALDOA, LDHB, LDHA, PFKL, ADPGK, PGD, PGAM1, HK2, HK1, PFKM, DLAT, OGDH, HIBADH, PDHB, GPI, TPI1, UEVLD, G6PD, PGM1, PDHA1, DHTKD1, GAPDH, MDH2, ENO1
GO:0015931~nucleobase, nucleoside, nucleotide and nucleic acid transport	37	1.53463	3.56396e-06	0.00663402	XPO1, NUP98, EIF5A, NUP93, NUP188, SLC29A1, NUP214, SLC35B2, DDX19A, NUP210, NUP50, NPM1, RANBP2, XPOT, NUP153, UPF1, MYO1C, SLC25A4, CKAP5, RAN, HNRNPA2B1, FMR1, G3BP2, NUP85, NXF1, NUP155, HNRNPA1, VDAC3, EIF4A3, PHAX, UPF3B, NUP62, NUP205, KHSRP, NUP107, SP9, LRPPRC
GO:0031396~regulation of protein ubiquitination	34	1.4102	3.81634e-06	0.0071038	FZR1, GCLC, CDC16, STUB1, PSMD2, PSMD3, PSMD4, PSMD5, PSMD6, PSMD7, RPS27A, DNAJA3, CDK1, GTPBP4, ANAPC5, CDC23, CDC20, SKP1, CDK5, UBE2N, CCNB1, PSMD14, PSMC6, PSMD13, PSMD12, PSMC4, PSMD11, PLK1, PSMC3, PSMC2, PSMA4, PSMC1, PSME3, ANAPC7
GO:0006403~RNA localization	34	1.4102	3.81634e-06	0.0071038	XPO1, NUP98, EIF5A, IGF2BP1, NUP93, NUP188, STAU1, NUP214, DDX19A, NUP210, NUP50, NPM1, RANBP2, XPOT, NUP153, UPF1, MYO1C, RAN, CKAP5, FMR1, HNRNPA2B1, G3BP2, NUP85, NXF1, NUP155, HNRNPA1, EIF4A3, PHAX, UPF3B, NUP62, NUP205, KHSRP, NUP107, LRPPRC
GO:0000059~protein import into nucleus, docking	12	0.497719	3.86172e-06	0.00718826	XPO1, NUP98, CSE1L, IPO7, IPO4, NUP205, IPO5, IPO11, IPO9, IPO8, KPNB1, TNPO1
GO:0006096~glycolysis	21	0.871008	4.13149e-06	0.0076904	ALDOA, LDHB, LDHA, PFKL, ADPGK, PGAM1, HK2, HK1, PFKM, DLAT, OGDH, PDHB, GPI, TPI1, UEVLD, PGM1, PDHA1, DHTKD1, GAPDH, MDH2, ENO1

## Sheet: Reported AURKA interactors
Gene	Description
ARFGAP1	ADP ribosylation factor GTPase activating protein 1(ARFGAP1)
ARPC2	actin related protein 2/3 complex subunit 2(ARPC2)
ASCC1	activating signal cointegrator 1 complex subunit 1(ASCC1)
ATAD3B	ATPase family, AAA domain containing 3B(ATAD3B)
AURKA	aurora kinase A(AURKA)
AURKB	aurora kinase B(AURKB)
CALU	calumenin(CALU)
CDC20	cell division cycle 20(CDC20)
CDC37	cell division cycle 37(CDC37)
CEP192	centrosomal protein 192(CEP192)
CEP55	centrosomal protein 55(CEP55)
CHUK	conserved helix-loop-helix ubiquitous kinase(CHUK)
CKAP5	cytoskeleton associated protein 5(CKAP5)
CNOT2	CCR4-NOT transcription complex subunit 2(CNOT2)
CSNK2A1	casein kinase 2 alpha 1(CSNK2A1)
CTNNB1	catenin beta 1(CTNNB1)
CTNND1	catenin delta 1(CTNND1)
CTPS1	CTP synthase 1(CTPS1)
DDB1	damage specific DNA binding protein 1(DDB1)
DDX5	DEAD-box helicase 5(DDX5)
DHX9	DExH-box helicase 9(DHX9)
EEF1A1	eukaryotic translation elongation factor 1 alpha 1(EEF1A1)
EEF1A2	eukaryotic translation elongation factor 1 alpha 2(EEF1A2)
EEF2	eukaryotic translation elongation factor 2(EEF2)
EPRS	glutamyl-prolyl-tRNA synthetase(EPRS)
EZR	ezrin(EZR)
FABP5	fatty acid binding protein 5(FABP5)
FUS	FUS RNA binding protein(FUS)
GAPVD1	GTPase activating protein and VPS9 domains 1(GAPVD1)
HARS2	histidyl-tRNA synthetase 2, mitochondrial(HARS2)
HNRNPA1	heterogeneous nuclear ribonucleoprotein A1(HNRNPA1)
HNRNPA2B1	heterogeneous nuclear ribonucleoprotein A2/B1(HNRNPA2B1)
HNRNPD	heterogeneous nuclear ribonucleoprotein D(HNRNPD)
HNRNPK	heterogeneous nuclear ribonucleoprotein K(HNRNPK)
HNRNPU	heterogeneous nuclear ribonucleoprotein U(HNRNPU)
HSP90AA1	heat shock protein 90 alpha family class A member 1(HSP90AA1)
HSP90AB1	heat shock protein 90 alpha family class B member 1(HSP90AB1)
HSPA1B	heat shock protein family A (Hsp70) member 1B(HSPA1B)
HSPA2	heat shock protein family A (Hsp70) member 2(HSPA2)
HSPA5	heat shock protein family A (Hsp70) member 5(HSPA5)
HSPA8	heat shock protein family A (Hsp70) member 8(HSPA8)
HSPA9	heat shock protein family A (Hsp70) member 9(HSPA9)
HSPD1	heat shock protein family D (Hsp60) member 1(HSPD1)
IARS	isoleucyl-tRNA synthetase(IARS)
IGF2BP1	insulin like growth factor 2 mRNA binding protein 1(IGF2BP1)
IGF2BP3	insulin like growth factor 2 mRNA binding protein 3(IGF2BP3)
ILF2	interleukin enhancer binding factor 2(ILF2)
ILF3	interleukin enhancer binding factor 3(ILF3)
IRS4	insulin receptor substrate 4(IRS4)
KIF11	kinesin family member 11(KIF11)
KIF2C	kinesin family member 2C(KIF2C)
LARP1	La ribonucleoprotein domain family member 1(LARP1)
LARP7	La ribonucleoprotein domain family member 7(LARP7)
LIMD1	LIM domains containing 1(LIMD1)
LRPPRC	leucine rich pentatricopeptide repeat containing(LRPPRC)
MAPRE2	microtubule associated protein RP/EB family member 2(MAPRE2)
MATR3	matrin 3(MATR3)
MECR	mitochondrial trans-2-enoyl-CoA reductase(MECR)
NCL	nucleolin(NCL)
NDC80	NDC80, kinetochore complex component(NDC80)
NPM1	nucleophosmin(NPM1)
NUF2	NUF2, NDC80 kinetochore complex component(NUF2)
PCMT1	protein-L-isoaspartate (D-aspartate) O-methyltransferase(PCMT1)
PDCD6	programmed cell death 6(PDCD6)
PFKM	phosphofructokinase, muscle(PFKM)
PLK1	polo like kinase 1(PLK1)
PPP1CA	protein phosphatase 1 catalytic subunit alpha(PPP1CA)
PPP1CC	protein phosphatase 1 catalytic subunit gamma(PPP1CC)
PRKACA	protein kinase cAMP-activated catalytic subunit alpha(PRKACA)
PRKCSH	protein kinase C substrate 80K-H(PRKCSH)
PRRC2C	proline rich coiled-coil 2C(PRRC2C)
RAB10	RAB10, member RAS oncogene family(RAB10)
RANBP3	RAN binding protein 3(RANBP3)
SDCCAG3	serologically defined colon cancer antigen 3(SDCCAG3)
SEC61B	Sec61 translocon beta subunit(SEC61B)
SH3GL1	SH3 domain containing GRB2 like 1, endophilin A2(SH3GL1)
SKP1	S-phase kinase associated protein 1(SKP1)
SMC2	structural maintenance of chromosomes 2(SMC2)
SNW1	SNW domain containing 1(SNW1)
SNX18	sorting nexin 18(SNX18)
SNX9	sorting nexin 9(SNX9)
SOD2	superoxide dismutase 2, mitochondrial(SOD2)
SRP9	signal recognition particle 9(SRP9)
SRPK1	SRSF protein kinase 1(SRPK1)
SRPK2	SRSF protein kinase 2(SRPK2)
TARS	threonyl-tRNA synthetase(TARS)
TP53	tumor protein p53(TP53)
TPX2	TPX2, microtubule nucleation factor(TPX2)
TRIM28	tripartite motif containing 28(TRIM28)
TUBB	tubulin beta class I(TUBB)
TUBB4B	tubulin beta 4B class IVb(TUBB4B)
TUBG1	tubulin gamma 1(TUBG1)
UBA1	ubiquitin like modifier activating enzyme 1(UBA1)
UBE2N	ubiquitin conjugating enzyme E2 N(UBE2N)
USP9X	ubiquitin specific peptidase 9, X-linked(USP9X)
XPO1	exportin 1(XPO1)
YBX1	Y-box binding protein 1(YBX1)
ZSWIM8	zinc finger SWIM-type containing 8(ZSWIM8)
