# Supplementary material for: Aurora kinase A localises to mitochondria to control organelle dynamics and energy production
Source: eLife journal article supplement (doi:10.7554/elife.38111), 2018-08-02
Supplement: supp [file elife-38111-supp-v1.zip › elife_poa_e38111_Supplementary_File_3.xlsx]

## Sheet: Foglio1
Plasmid	Cloning sites	Remarks	Primers for site-directed mutagenesis (5' to 3'): sense	Primers for site-directed mutagenesis (5' to 3'): anti-sense
pcDNA 3.1 AURKA 6xHis	HindIII/EcoRI
pcDNA 3.1 AURKA DNter 6xHis	HindIII/EcoRI	the first 30 amino acids of AURKA are lacking
pcDNA 3.1 mitoAURKA 6xHis	HindIII/EcoRI	AURKA without the first 30 amino acids replaced by the MTS of CoxVIII
pcDNA 3.1 AURKA Lys162Met 6xHis		Source plasmid: pcDNA 3.1 AURKA 6xHis	CAAGTTTATTCTGGCTCTTATGGTGTTATTTAAAGCTCAGCT	AGCTGAGCTTTAAATAACACCATAAGAGCCAGAATAAACTTG
pcDNA mitoAURKA Lys162Met 6xHis		Source plasmid: pcDNA 3.1 mitoAURKA 6xHis	CAAGTTTATTCTGGCTCTTATGGTGTTATTTAAAGCTCAGCT	AGCTGAGCTTTAAATAACACCATAAGAGCCAGAATAAACTTG
pcDNA3 AURKA-GFP	HindIII/BamHI	Source plasmid: pcDNA 3-EGFP
pEGFP N1 AURKA DNter	BglII/HindIII	the first 30 amino acids of AURKA are lacking
pEGFP N1 mitoAURKA	BglII/HindIII	AURKA without the first 30 amino acids replaced by the MTS of CoxVIII
pEGFP N1 AURKA 1-100	EcoRI/BamHI	The first 100 amino acids of AURKA were cloned
pEGFP N1 AURKA 1-30	EcoRI/BamHI	The first 30 amino acids of AURKA were cloned
pAURKA GFP-AURKA		donor-only construct of the AURKA biosensor, from Bertolin et al 2016
pAURKA GFP-AURKA-mCherry		AURKA biosensor, from Bertolin et al 2016
pLKO Puro shControl		purchased from Sigma-Aldrich (see materials and methods)
pLKO Puro shAURKA		purchased from Sigma-Aldrich (see materials and methods)
pET 21a AURKA 6xHis	BamHI/XhoI
pET 21a AURKA DNter 6xHis	BamHI/HindIII	the first 30 amino acids of AURKA are lacking
pET 21a RALA	EcoRI/HindIII	Insert from Addgene plasmid #15251
pEGFP N1 mitoGFP	EcoRI/BamHI	Insert from pCMV7 mitomCherry
pCMV7 mitomCherry		Kind gift of O. Corti, Brain and Spine institute, France.
pCMV7 mitoDendra2	NdeI/AgeI	Plasmid backbone: pCMV7 mitomCherry
pmCherry C1 SNPJN2	BsrGI/EcoRI
pmitoTimer		Addgene plasmid: #52659
pmCherry DNML1		Addgene plasmid: #49152
pmCherry N1 MFN2	EcoRI/AgeI	Insert from Addgene plasmid #28010
pmCherry C1 MFF	HindIII/BamHI	Insert from Addgene plasmid #49153
pmCherry N1 OPA1	XhoI/BamHI	Insert from Addgene plasmid #26047
pmcherry N1 TOMM20	XhoI/BamHI	Insert from Addgene plasmid #40291
pmcherry N1 TOMM22	EcoRI/AgeI	Insert from Bertolin et al, 2013.
pmcherry N1 TOMM40	HindIII/BamHI	Insert from Bertolin et al, 2013.
pmcherry N1 TOMM70	XhoI/BamHI	Insert from Bertolin et al, 2013.
pCETN1-iRFP670		From Bertolin et al, 2016.
mCherry-PCNA-19-SV40NLS-4		Addgene plasmid: #55117
