# Supplementary material for: Aurora kinase A localises to mitochondria to control organelle dynamics and energy production
Source: eLife journal article supplement (doi:10.7554/elife.38111), 2018-08-02
Supplement: supp [file elife-38111-supp-v1.zip › elife_poa_e38111_Supplementary_File_4.xlsx]

## Sheet: Foglio1
Name used in publication	GENOTYPES	Source	Identifiers
WT (w1118)	w1118
Sca-Gal4	sca-GAL4	PMID: 2125959
mitoDendra2	UAS-mito-Dendra (on II)	Thomas Rival: to be published
aurA ST	aurAST	PMID: 23685146
aurA 3A	aurA3A	this paper
aurA 2G	aurA2G	this paper
aurA dsRNA	UAS-AurAdsRNA	Vienna Drosophila RNAi Center	VDRC : 108446
aurA exel	UAS-aurA.Exel (on III)	Bloomington Drosophila Stock Center	BDSC: 8376
aurA exel	UAS-aurA.Exel (on II)	Bloomington Drosophila Stock Center	BDSC: 8377
Drp1	UAS-Drp1	Bloomington Drosophila Stock Center	BDSC: 51647
