# Supplementary material for: Aurora kinase A localises to mitochondria to control organelle dynamics and energy production
Source: eLife journal article supplement (doi:10.7554/elife.38111), 2018-08-02
Supplement: supp [file elife-38111-supp-v1.zip › elife_poa_e38111_Supplementary_File_5.xlsx]

## Sheet: Foglio1
GENOTYPES	PANELS
w1118; Sca-GAL4, UAS-Mito Dendra / +	Fig. 3B and Fig. supplemental 4B, C (WT)
Sca-GAL4, UAS-mito-Dendra / + ; aurAST/2G	Fig. supplemental 4B (aurA ST/2G)
Sca-GAL4, UAS-mito-Dendra / UAS-aurAdsRNA	Fig. supplemental 4C (aurA dsRNA)
Sca-GAL4, UAS-mito-Dendra / + ; UAS-aurA.Exel / +	Fig. supplemental 4B (aurA O/E)
Sca-GAL4, UAS-mito-Dendra / + ; aurA2G/3A	Fig. supplemental 4B (aurA 2G/3A)
Sca-GAL4, UAS-mito-Dendra / + ; aurAST/+	Fig. supplemental 4B (aurA ST/+)
Sca-GAL4, UAS-mito-Dendra / + ; aurA2G/+	Fig. supplemental 4B (aurA 2G/+)
Sca-GAL4, UAS-mito-Dendra / + ; aurA3A/+	Fig. supplemental 4B (aurA 3A/+)
Sca-GAL4, UAS-mito-Dendra / UAS-aurA.Exel; +	Fig. supplemental 6G (aurA O/E; +)
Sca-GAL4, UAS-mito-Dendra / UAS-aurA.Exel; UAS-Drp1 / +	Fig. supplemental 6G (aurA O/E; Drp1)
Sca-GAL4, UAS-mito-Dendra / + ; UAS-Drp1 / +	Fig. supplemental 6G (+; Drp1)
