# Supplementary material for: Aurora kinase A localises to mitochondria to control organelle dynamics and energy production
Source: eLife journal article supplement (doi:10.7554/elife.38111), 2018-08-02
Supplement: supp [file elife-38111-supp-v1.zip › elife_poa_e38111_Supplementary_File_6.xlsx]

## Sheet: Feuil 1
Antibody	Brand	Catalogue n°	Dilution
AURKA	Merck Millipore	PC742	1:1,000
AURKA	home made	clone 5C3 (ref. 48)	1:20
Drp1	BD Pharmingen	611112	1:2,000
Drp1 pS616 (DA91)	Cell Signaling	4494	1:1,000
Drp1 pS637	Cell Signaling	4867	1:1,000
Fis1 (TTC1) clone EPR8412	abcam	ab156865	1:1,000
GFP	Roche/ Sigma Aldrich	11814460001	1:1,000
Histone H3 pS10	Millipore	06-570	1:10,000
His tag	Covalab	mab90001-P	1:3,000 in 3% BSA
Mff	abcam	ab81127	1:500
MitoFusin 1	abcam	ab57602	1:1,000
MitoFusin 2	abcam	ab56889	1:500
Opa1	abcam	ab157457	1:1,000
OXPHOS Rodent WB Antibody Cocktail	Mitosciences	ab110413	1:1,000
PMPCB	Proteintech	16064-1-AP	1:1,000
RalA S194	Millipore	07-2119	1:1,000
Tom22	Abcam	Ab10436	1:500
Tom70	Abcam	Ab106193	1:5,000
Tubulin alpha clone YL1/2	Millipore	MAB1864	1:5,000
VDAC1	Abcam	ab15895	1:1,000
