# Supplementary material for: Aurora kinase A localises to mitochondria to control organelle dynamics and energy production
Source: eLife journal article supplement (doi:10.7554/elife.38111), 2018-08-02
Supplement: supp [file elife-38111-supp-v1.zip › elife_poa_e38111_Supplementary_File_7.xlsx]

## Sheet: Feuil1
Primary Ab	Catalogue n°	Primary Ab dilution	Secondary Ab or PAG Reference
Mouse anti-AURKA	Home made (ref. # 46)	pure	GAM, Aurion 810-044
		pure	PAG 15 nm, CMC Utrecht
Rabbit anti-GFP	Life Science A11122	0.02	GAR, Aurion 806-011
		0.02	GAR ultra small, Aurion 800-011
		0.02	PAG 15 nm, CMC Utrecht
Chicken anti-GFP	Abcam ab13970	0.02	RAC, Aurion 810-222
Rabbit anti-SOD2	Santa Cruz sc30080	0.025	PAG 15 nm, CMC Utrecht
Rabbit anti-GFP	Life Science A11122	1/50	PAG 15 nm, CMC Utrecht
No	__	__	GAM, Aurion 810-044
			PAG 15 nm, CMC Utrecht
