# Supplementary figures and images for: Aurora kinase A localises to mitochondria to control organelle dynamics and energy production
Source: eLife journal article supplement (doi:10.7554/elife.38111), 2018-08-02

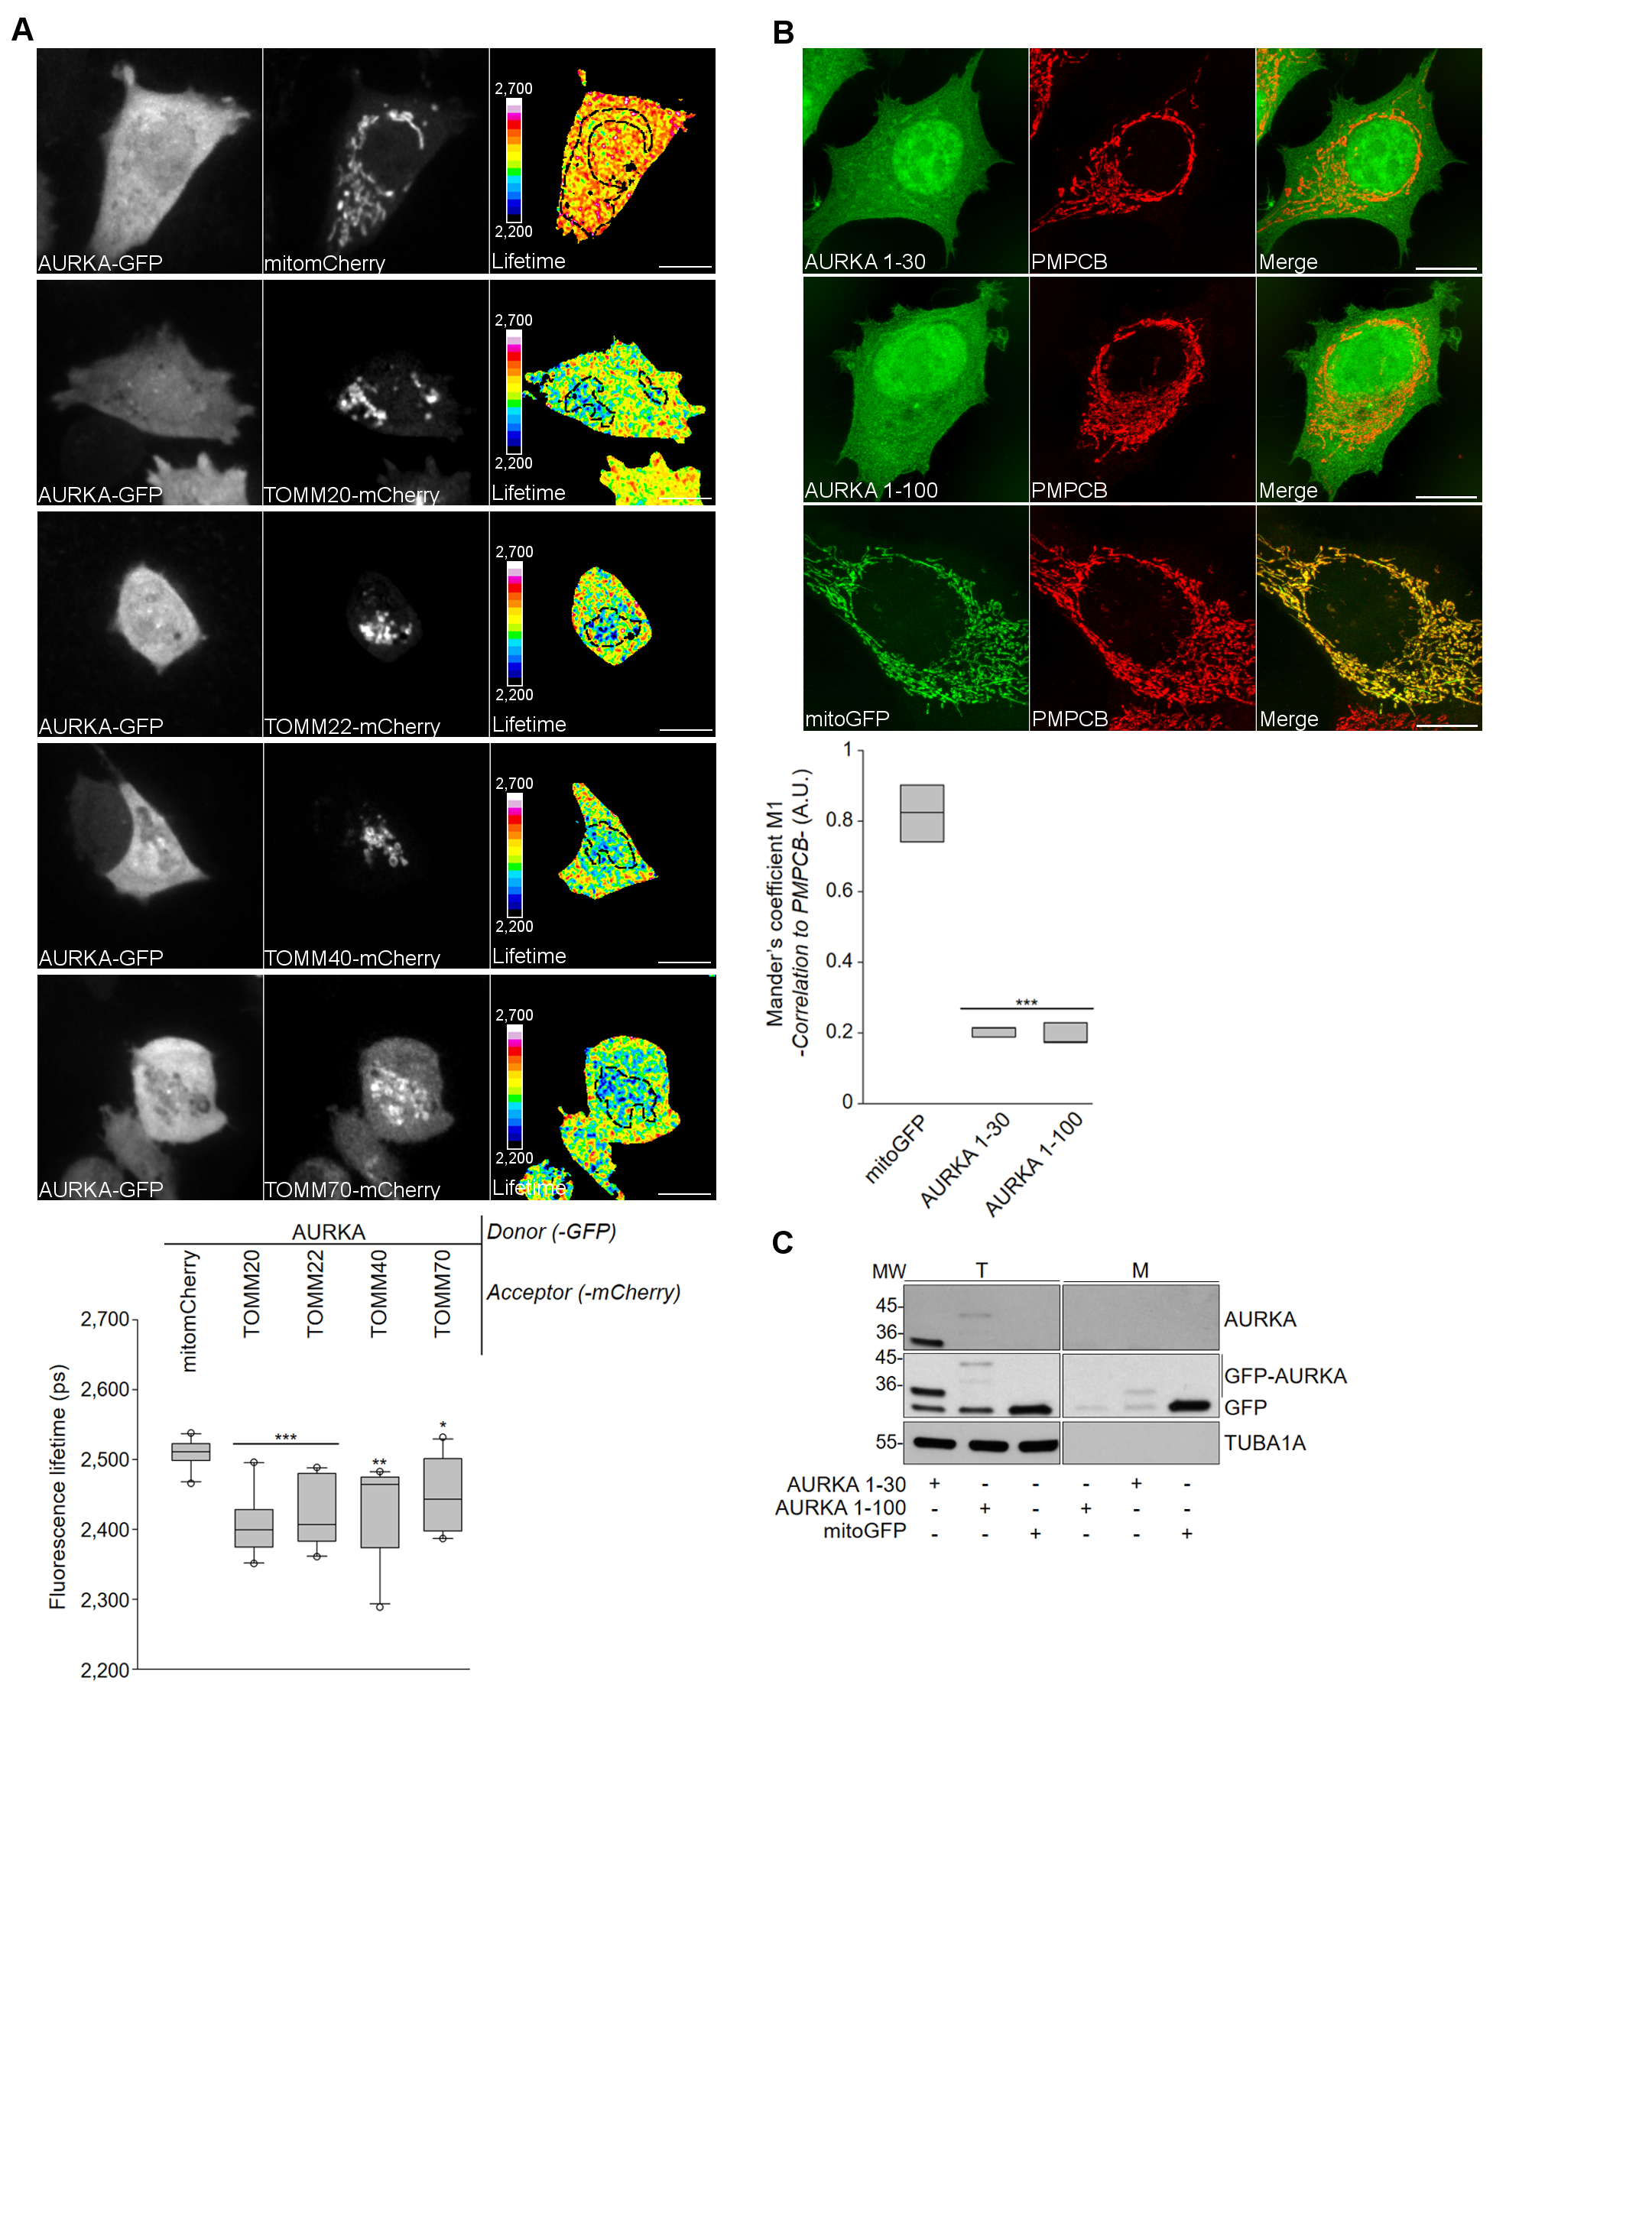

Supplement: supp [file elife-38111-supp-v1.zip › elife_poa_e38111_Figure_1_figure_supplement_2.tif]

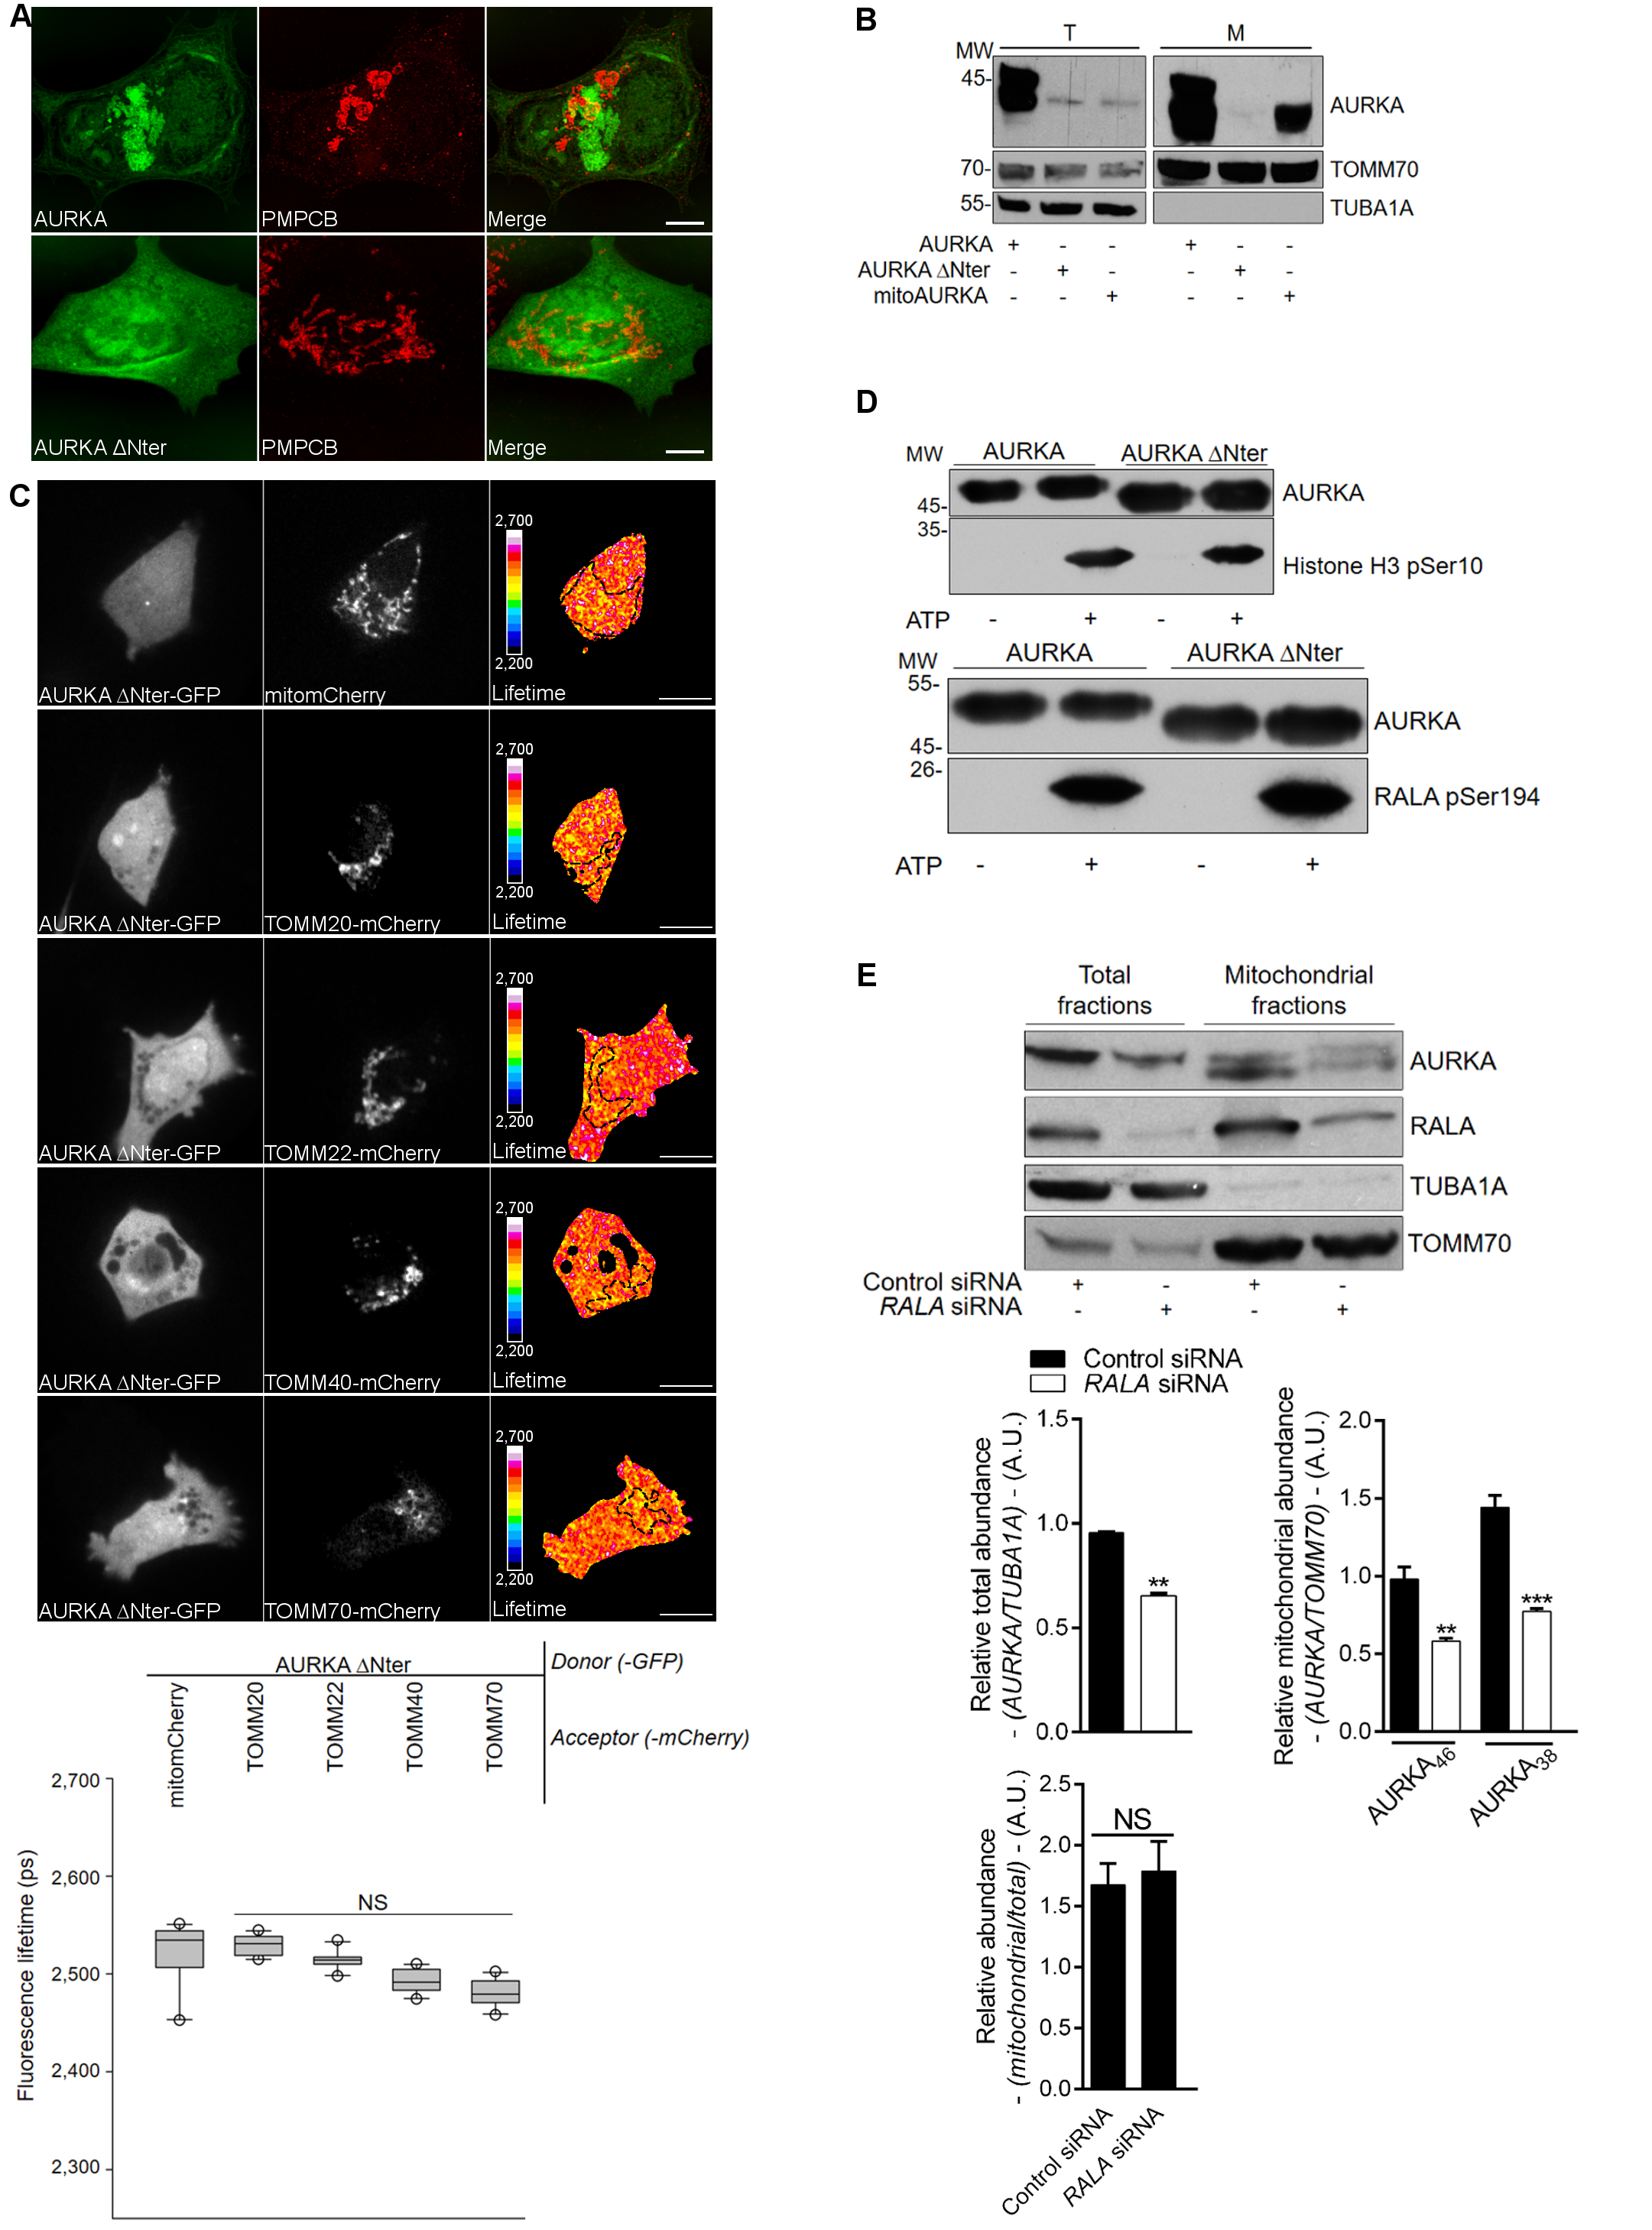

Supplement: supp [file elife-38111-supp-v1.zip › elife_poa_e38111_Figure_1_figure_supplement_3.tif]

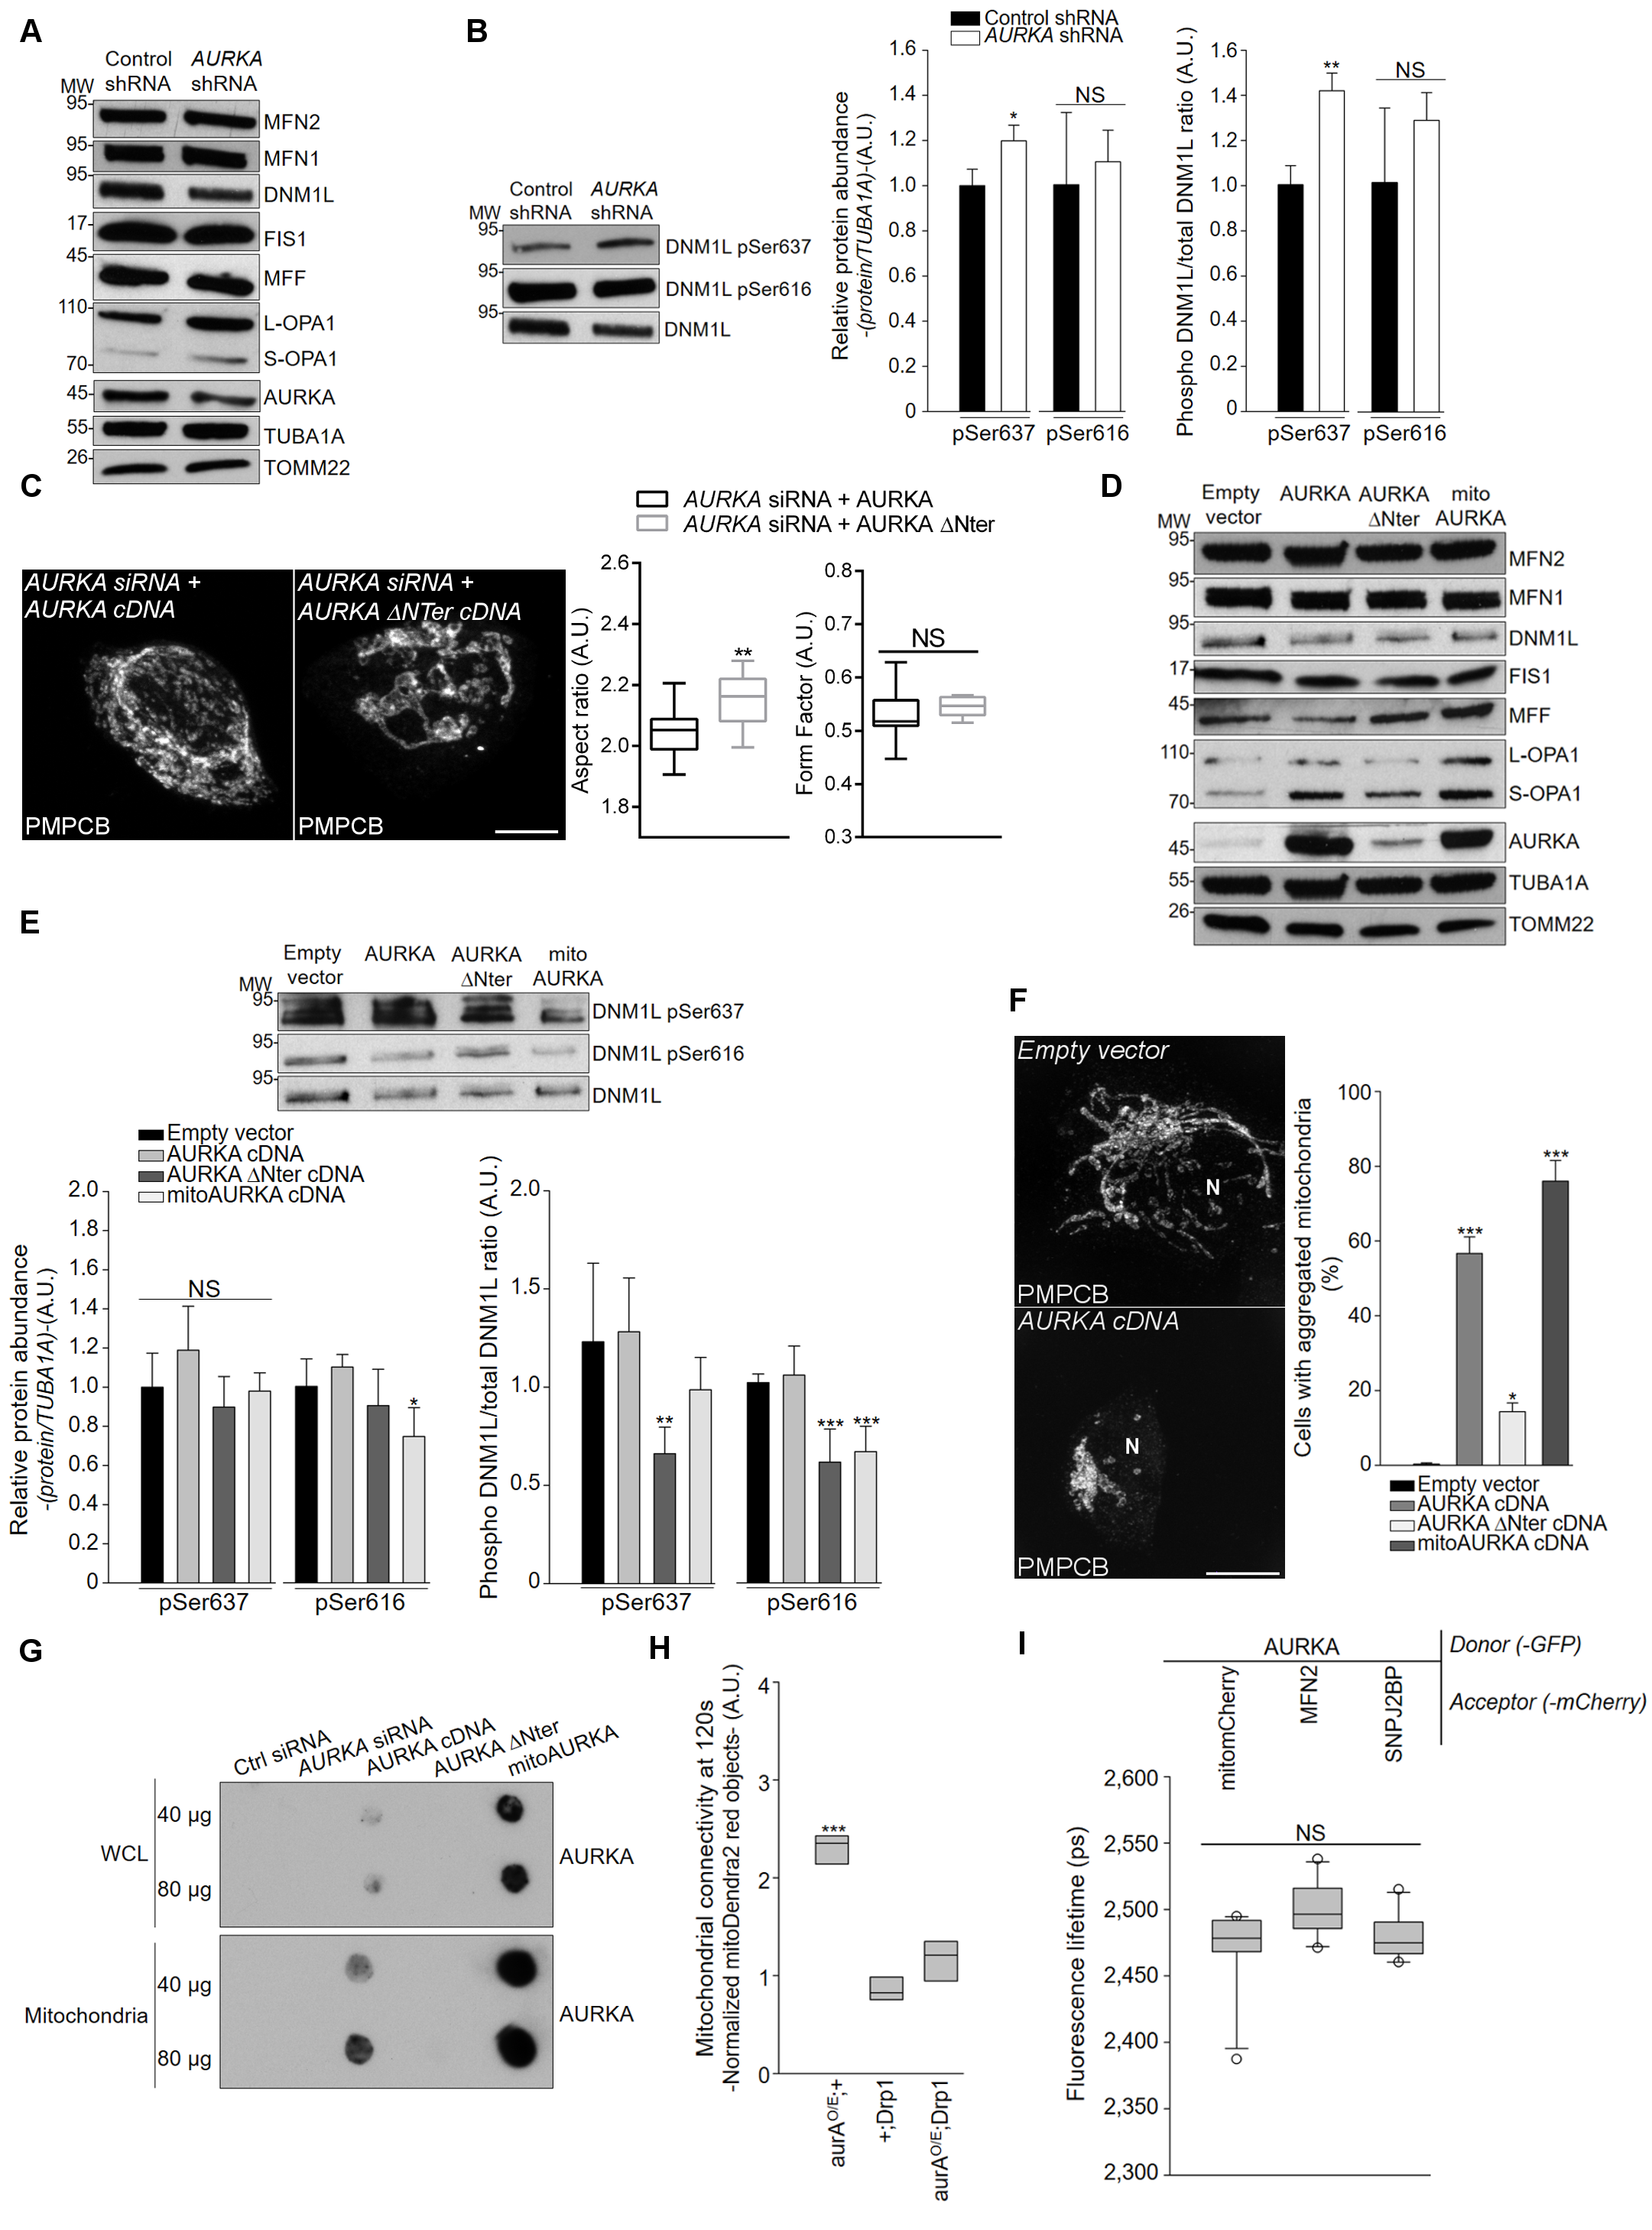

Supplement: supp [file elife-38111-supp-v1.zip › elife_poa_e38111_Figure_3_figure_supplement_3.tif]

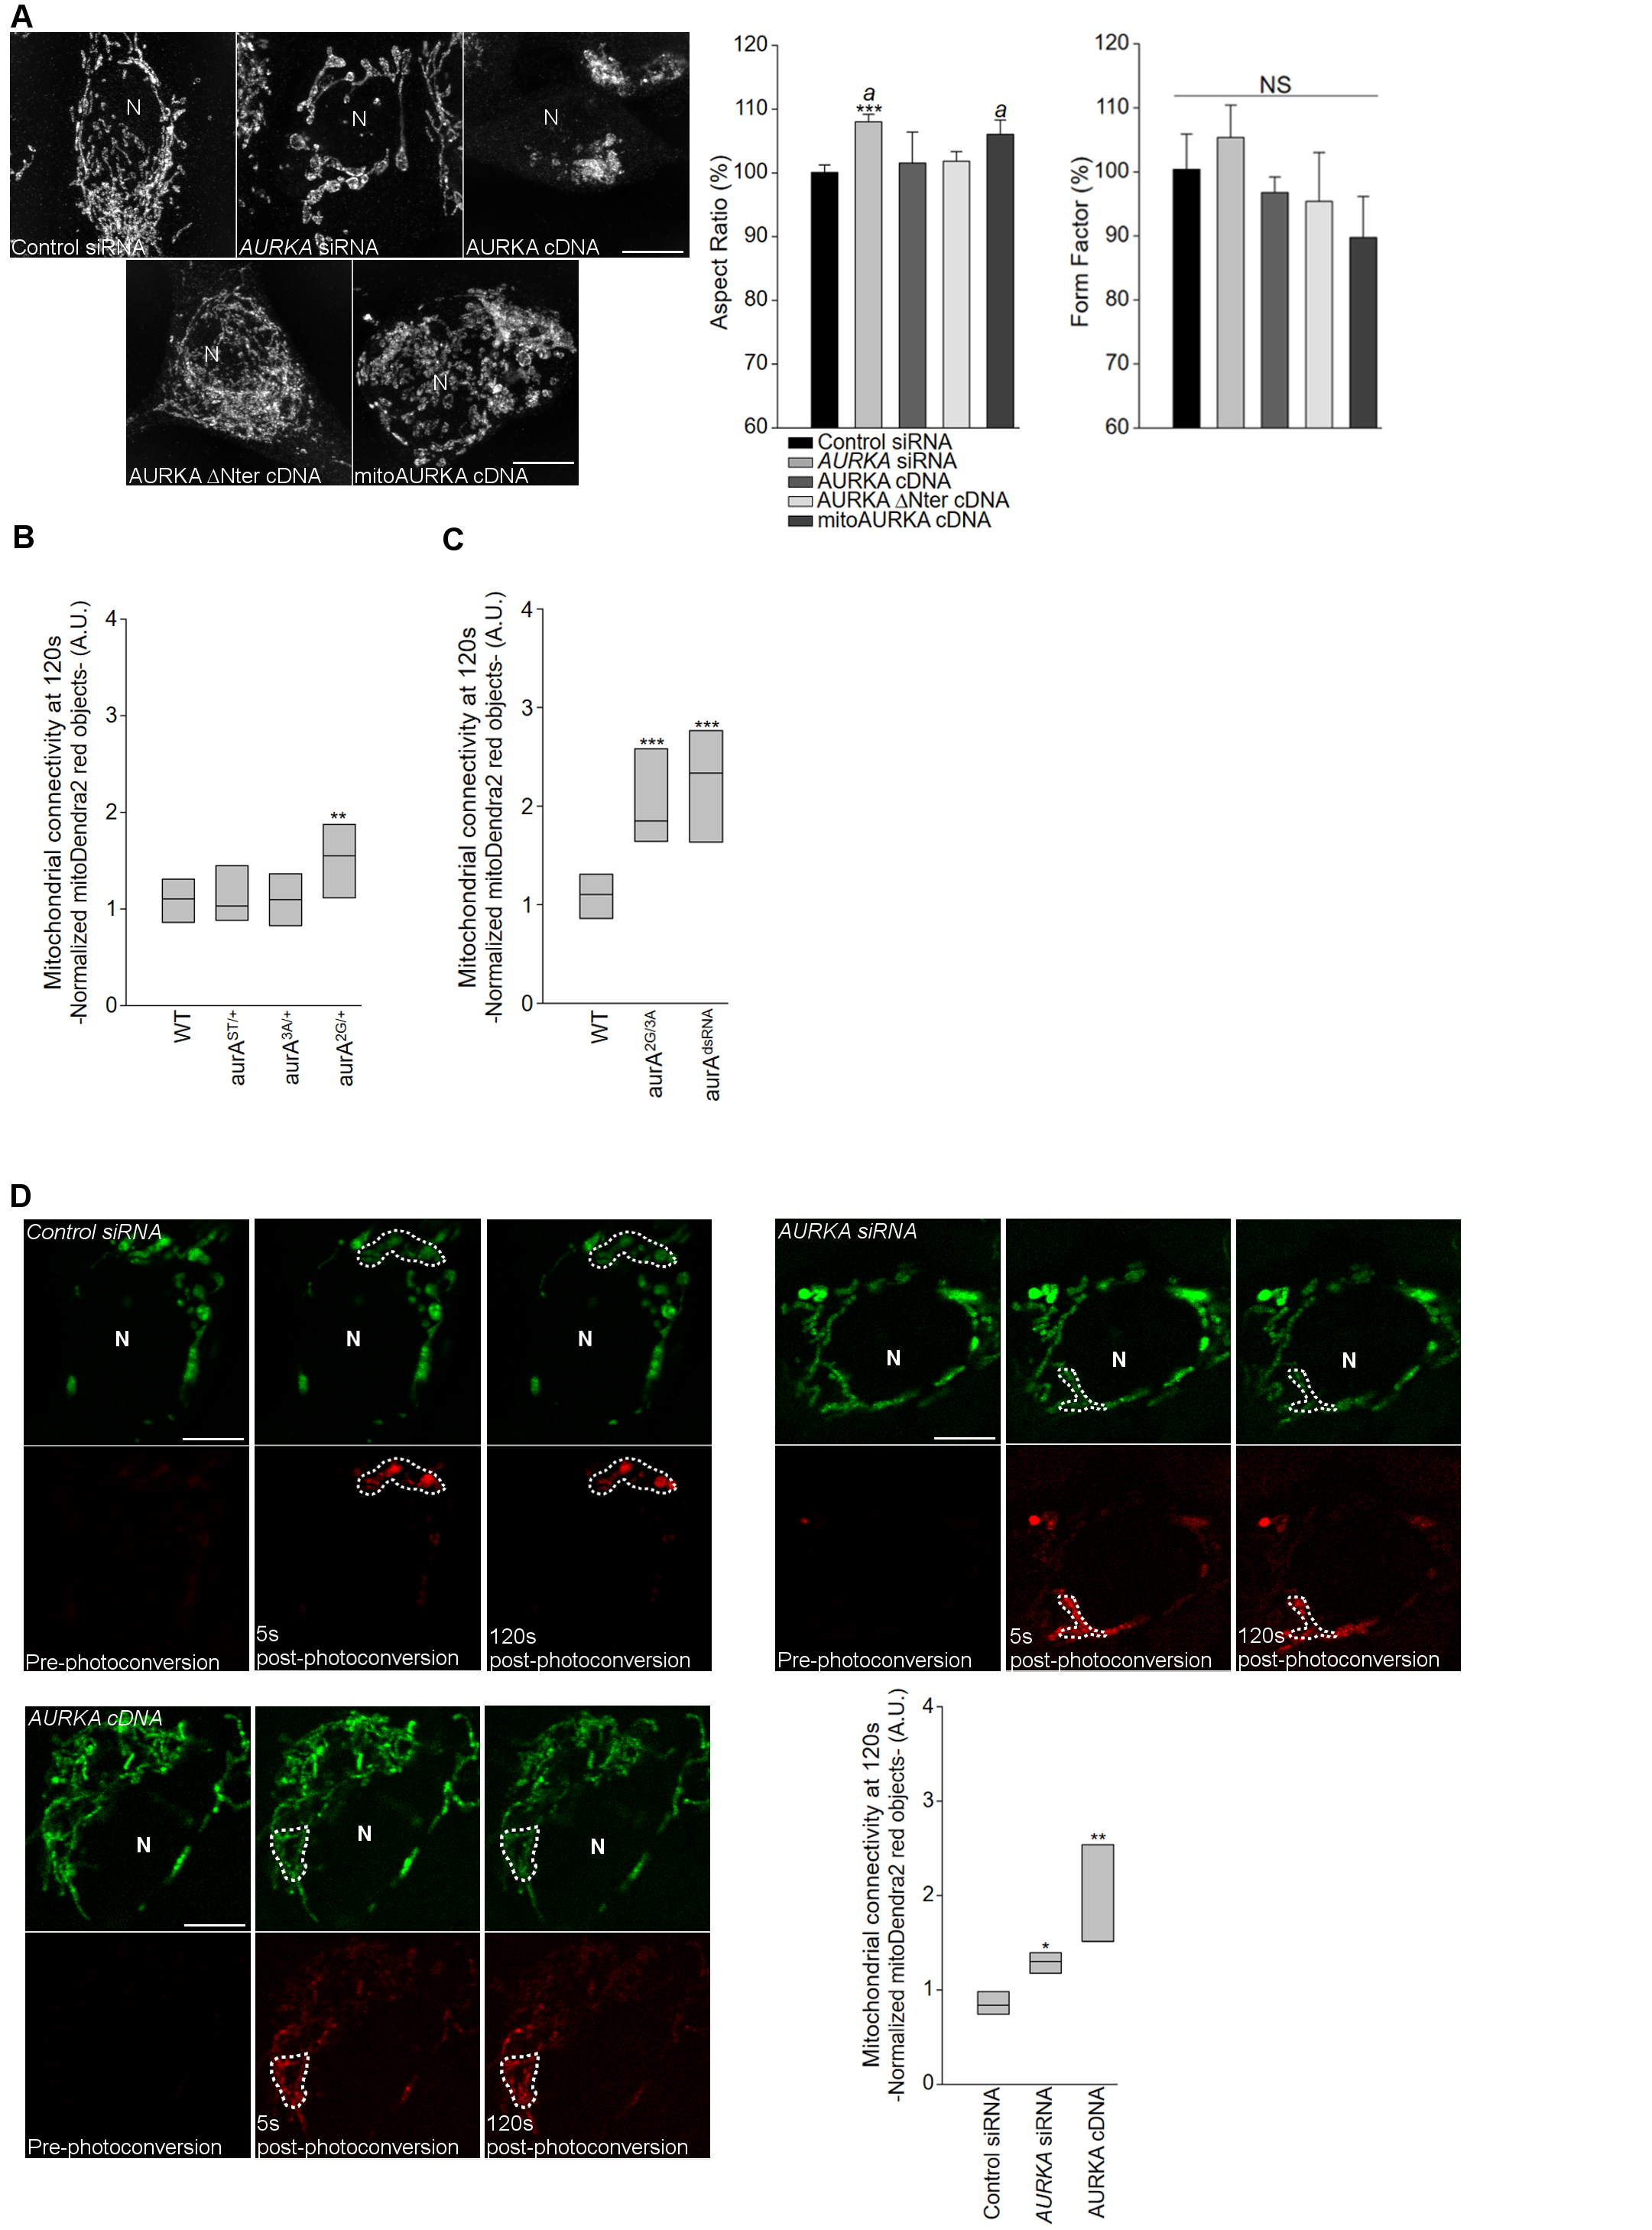

Supplement: supp [file elife-38111-supp-v1.zip › elife_poa_e38111_Figure_3_figure_supplement_1.tif]

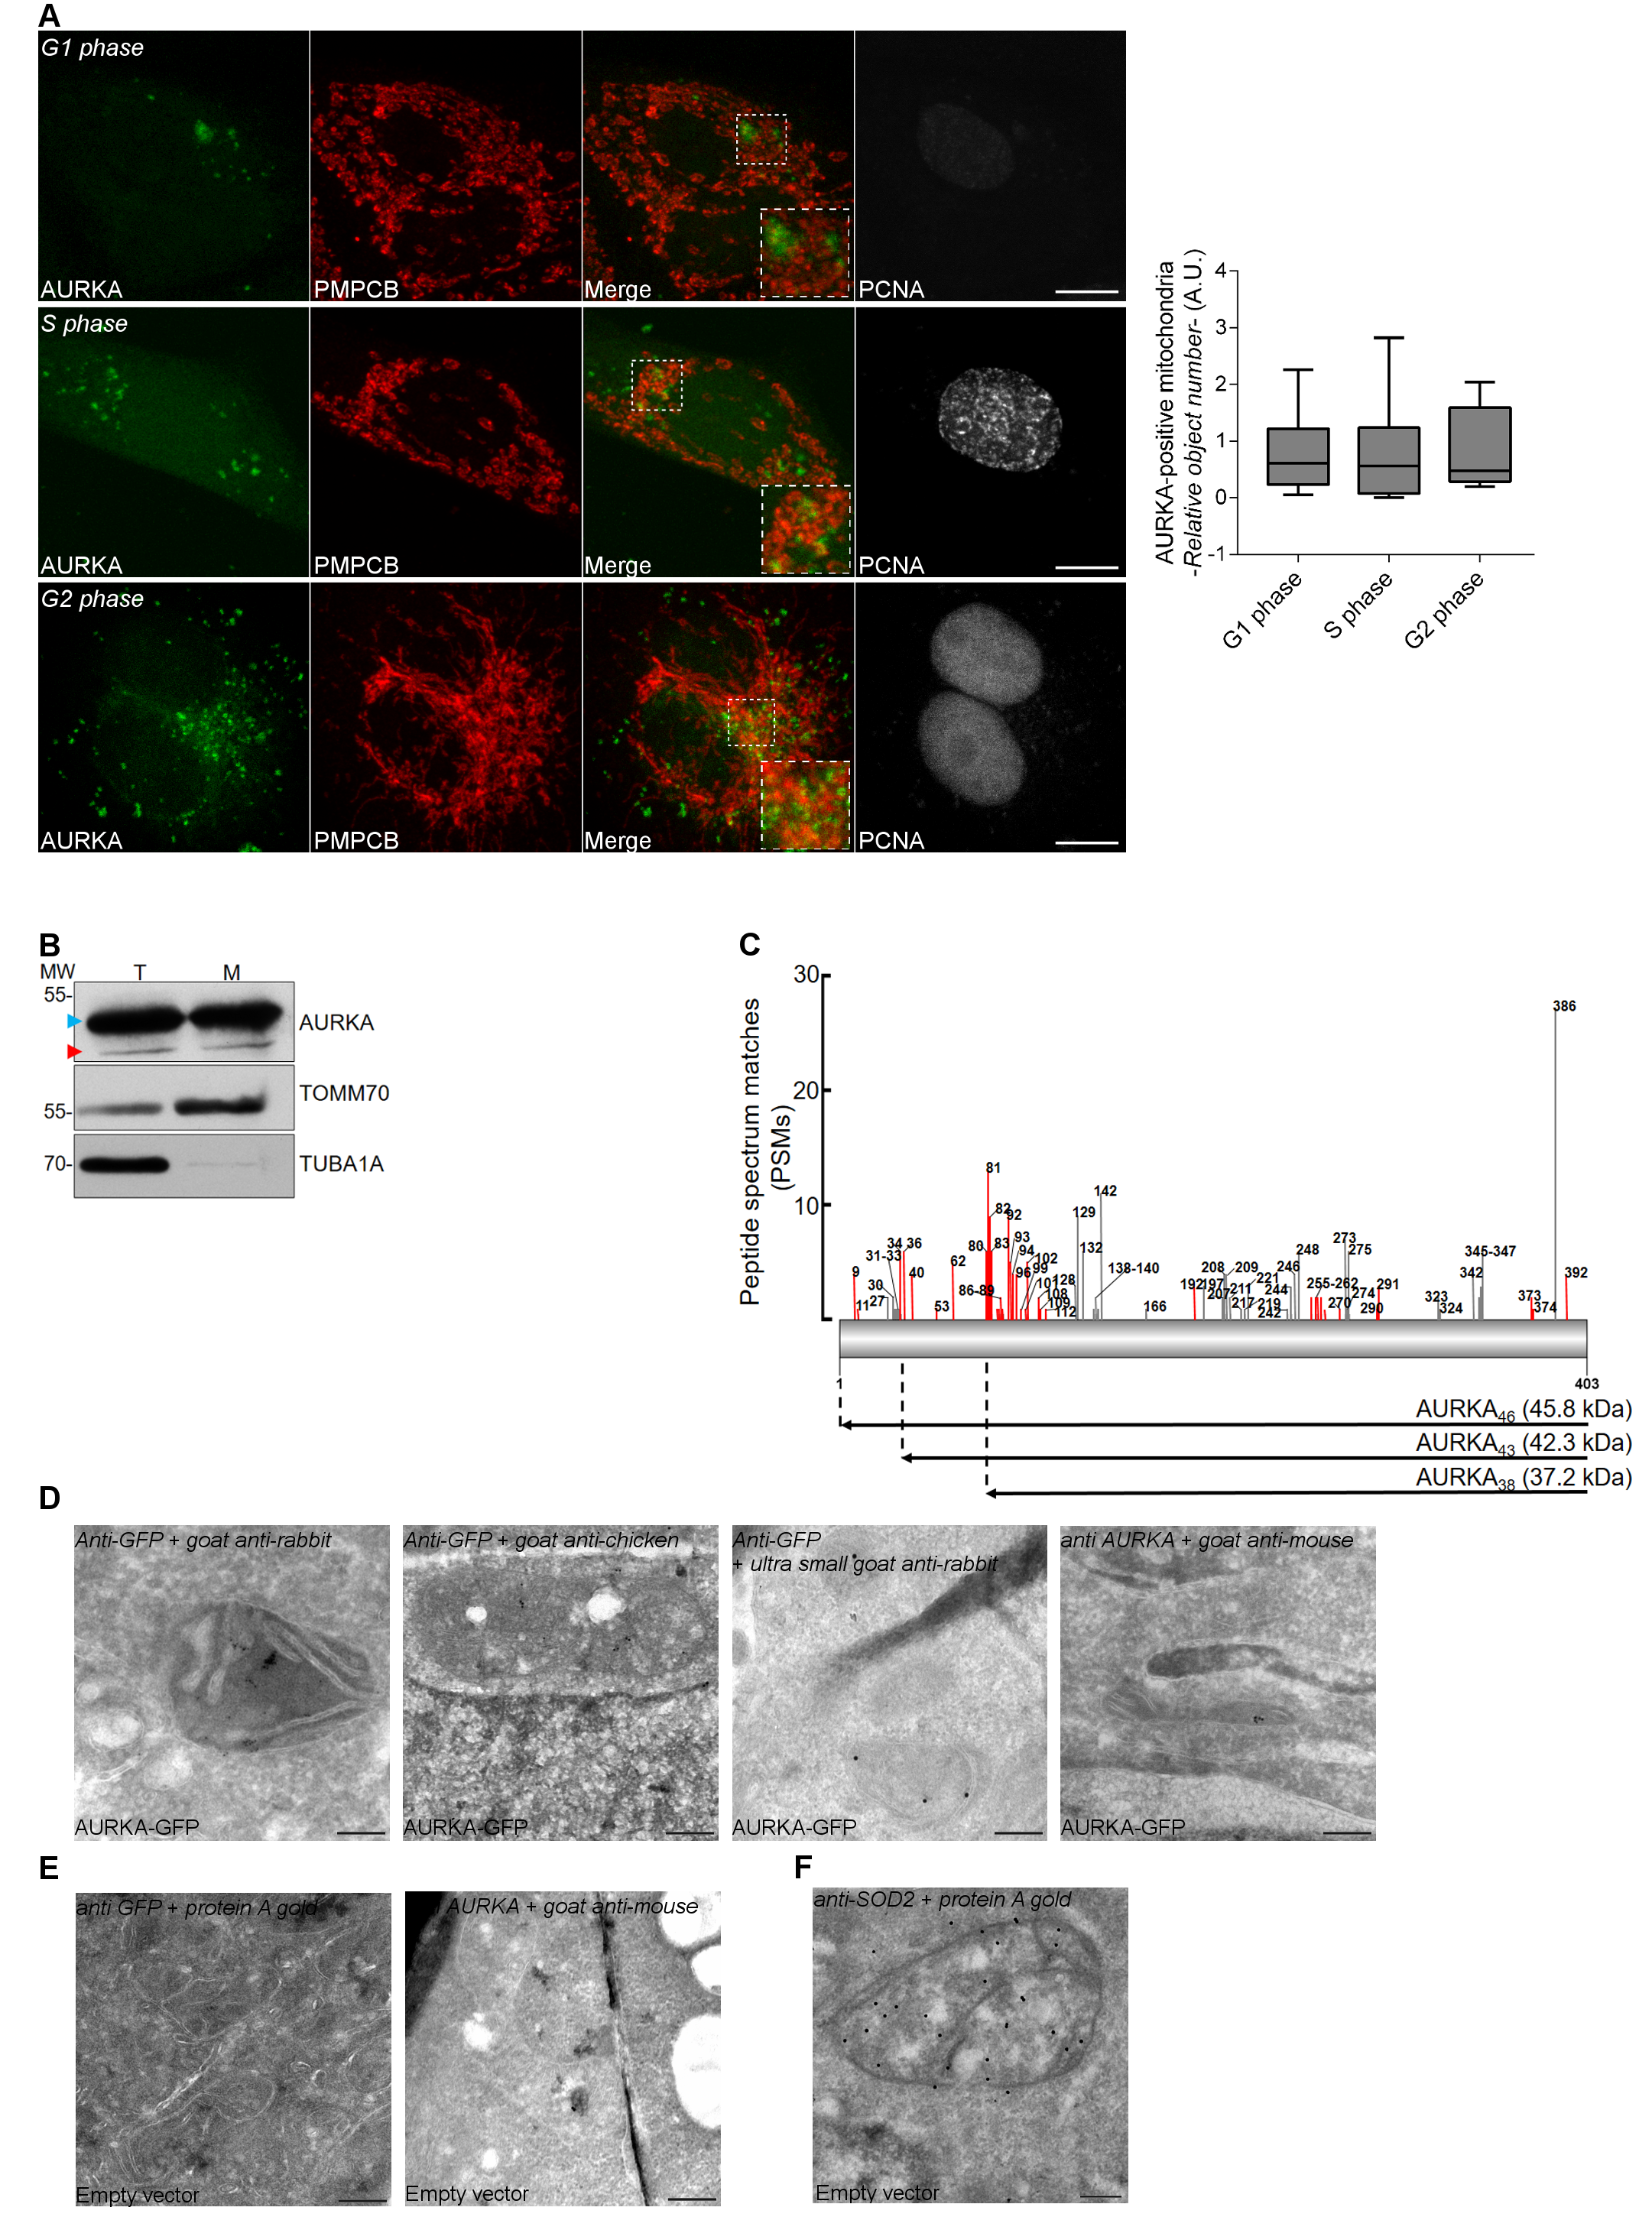

Supplement: supp [file elife-38111-supp-v1.zip › elife_poa_e38111_Figure_1_figure_supplement_1.tif]

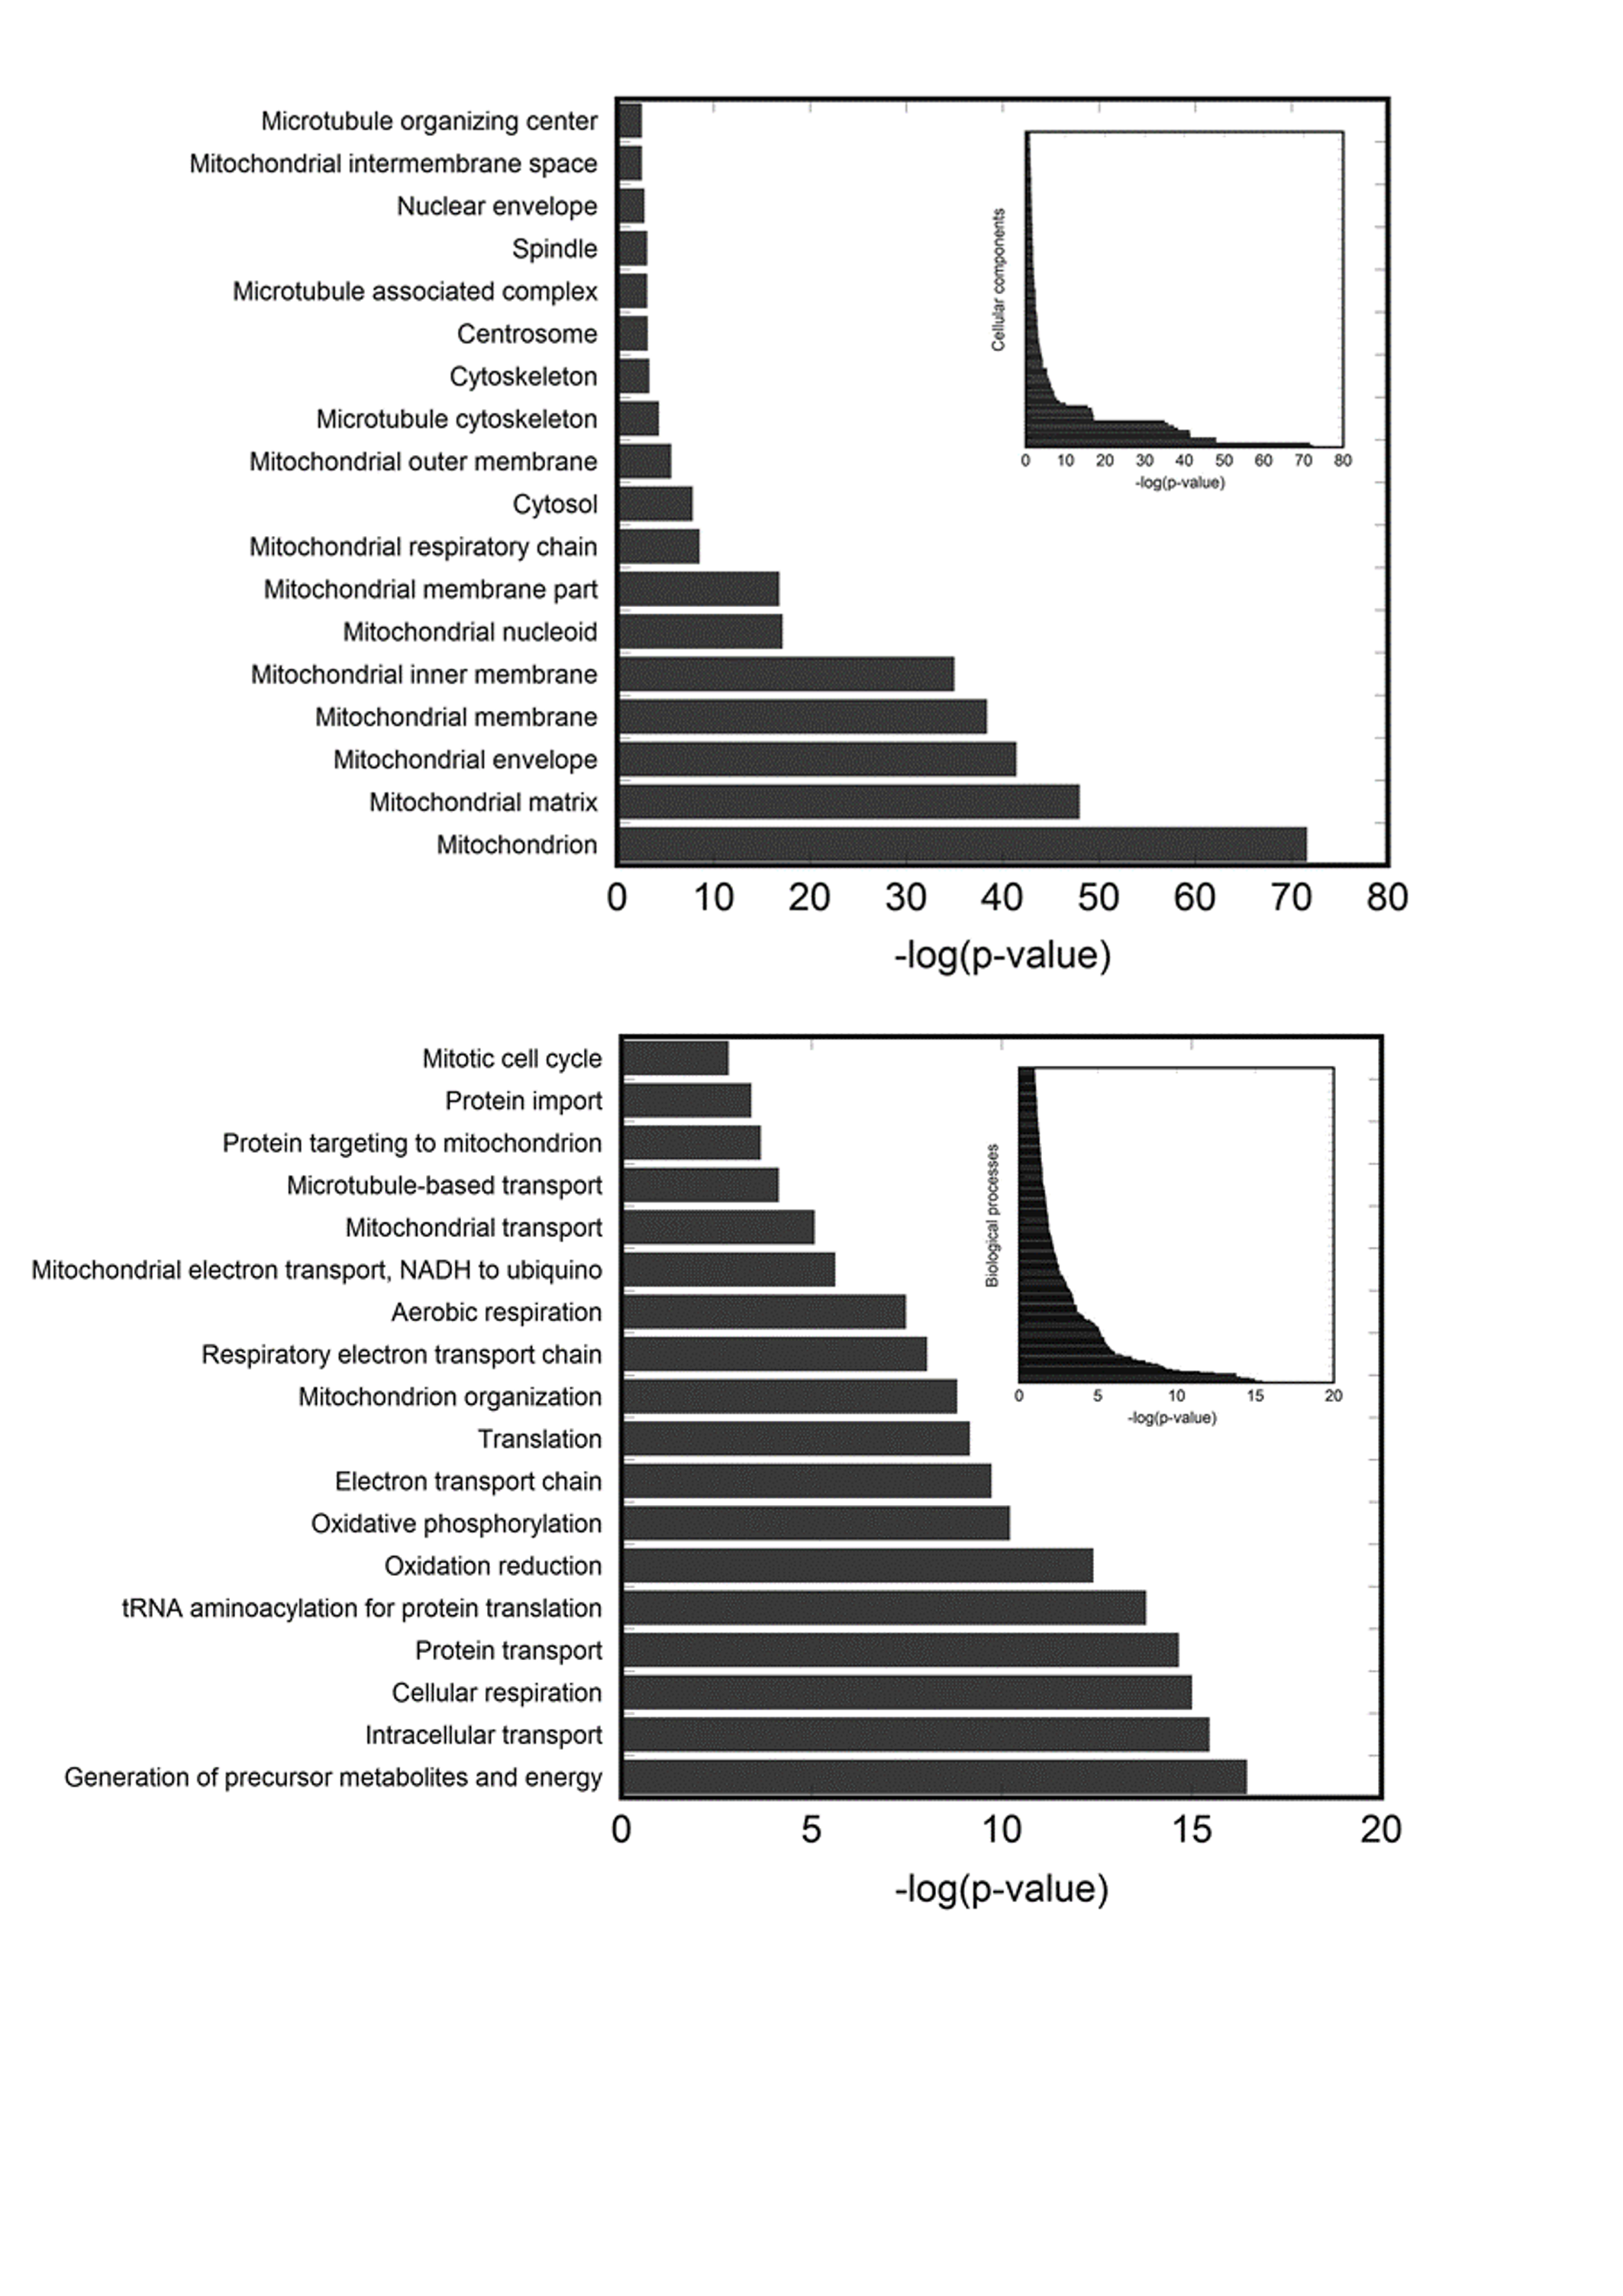

Supplement: supp [file elife-38111-supp-v1.zip › elife_poa_e38111_Figure_5_figure_supplement_1.tif]

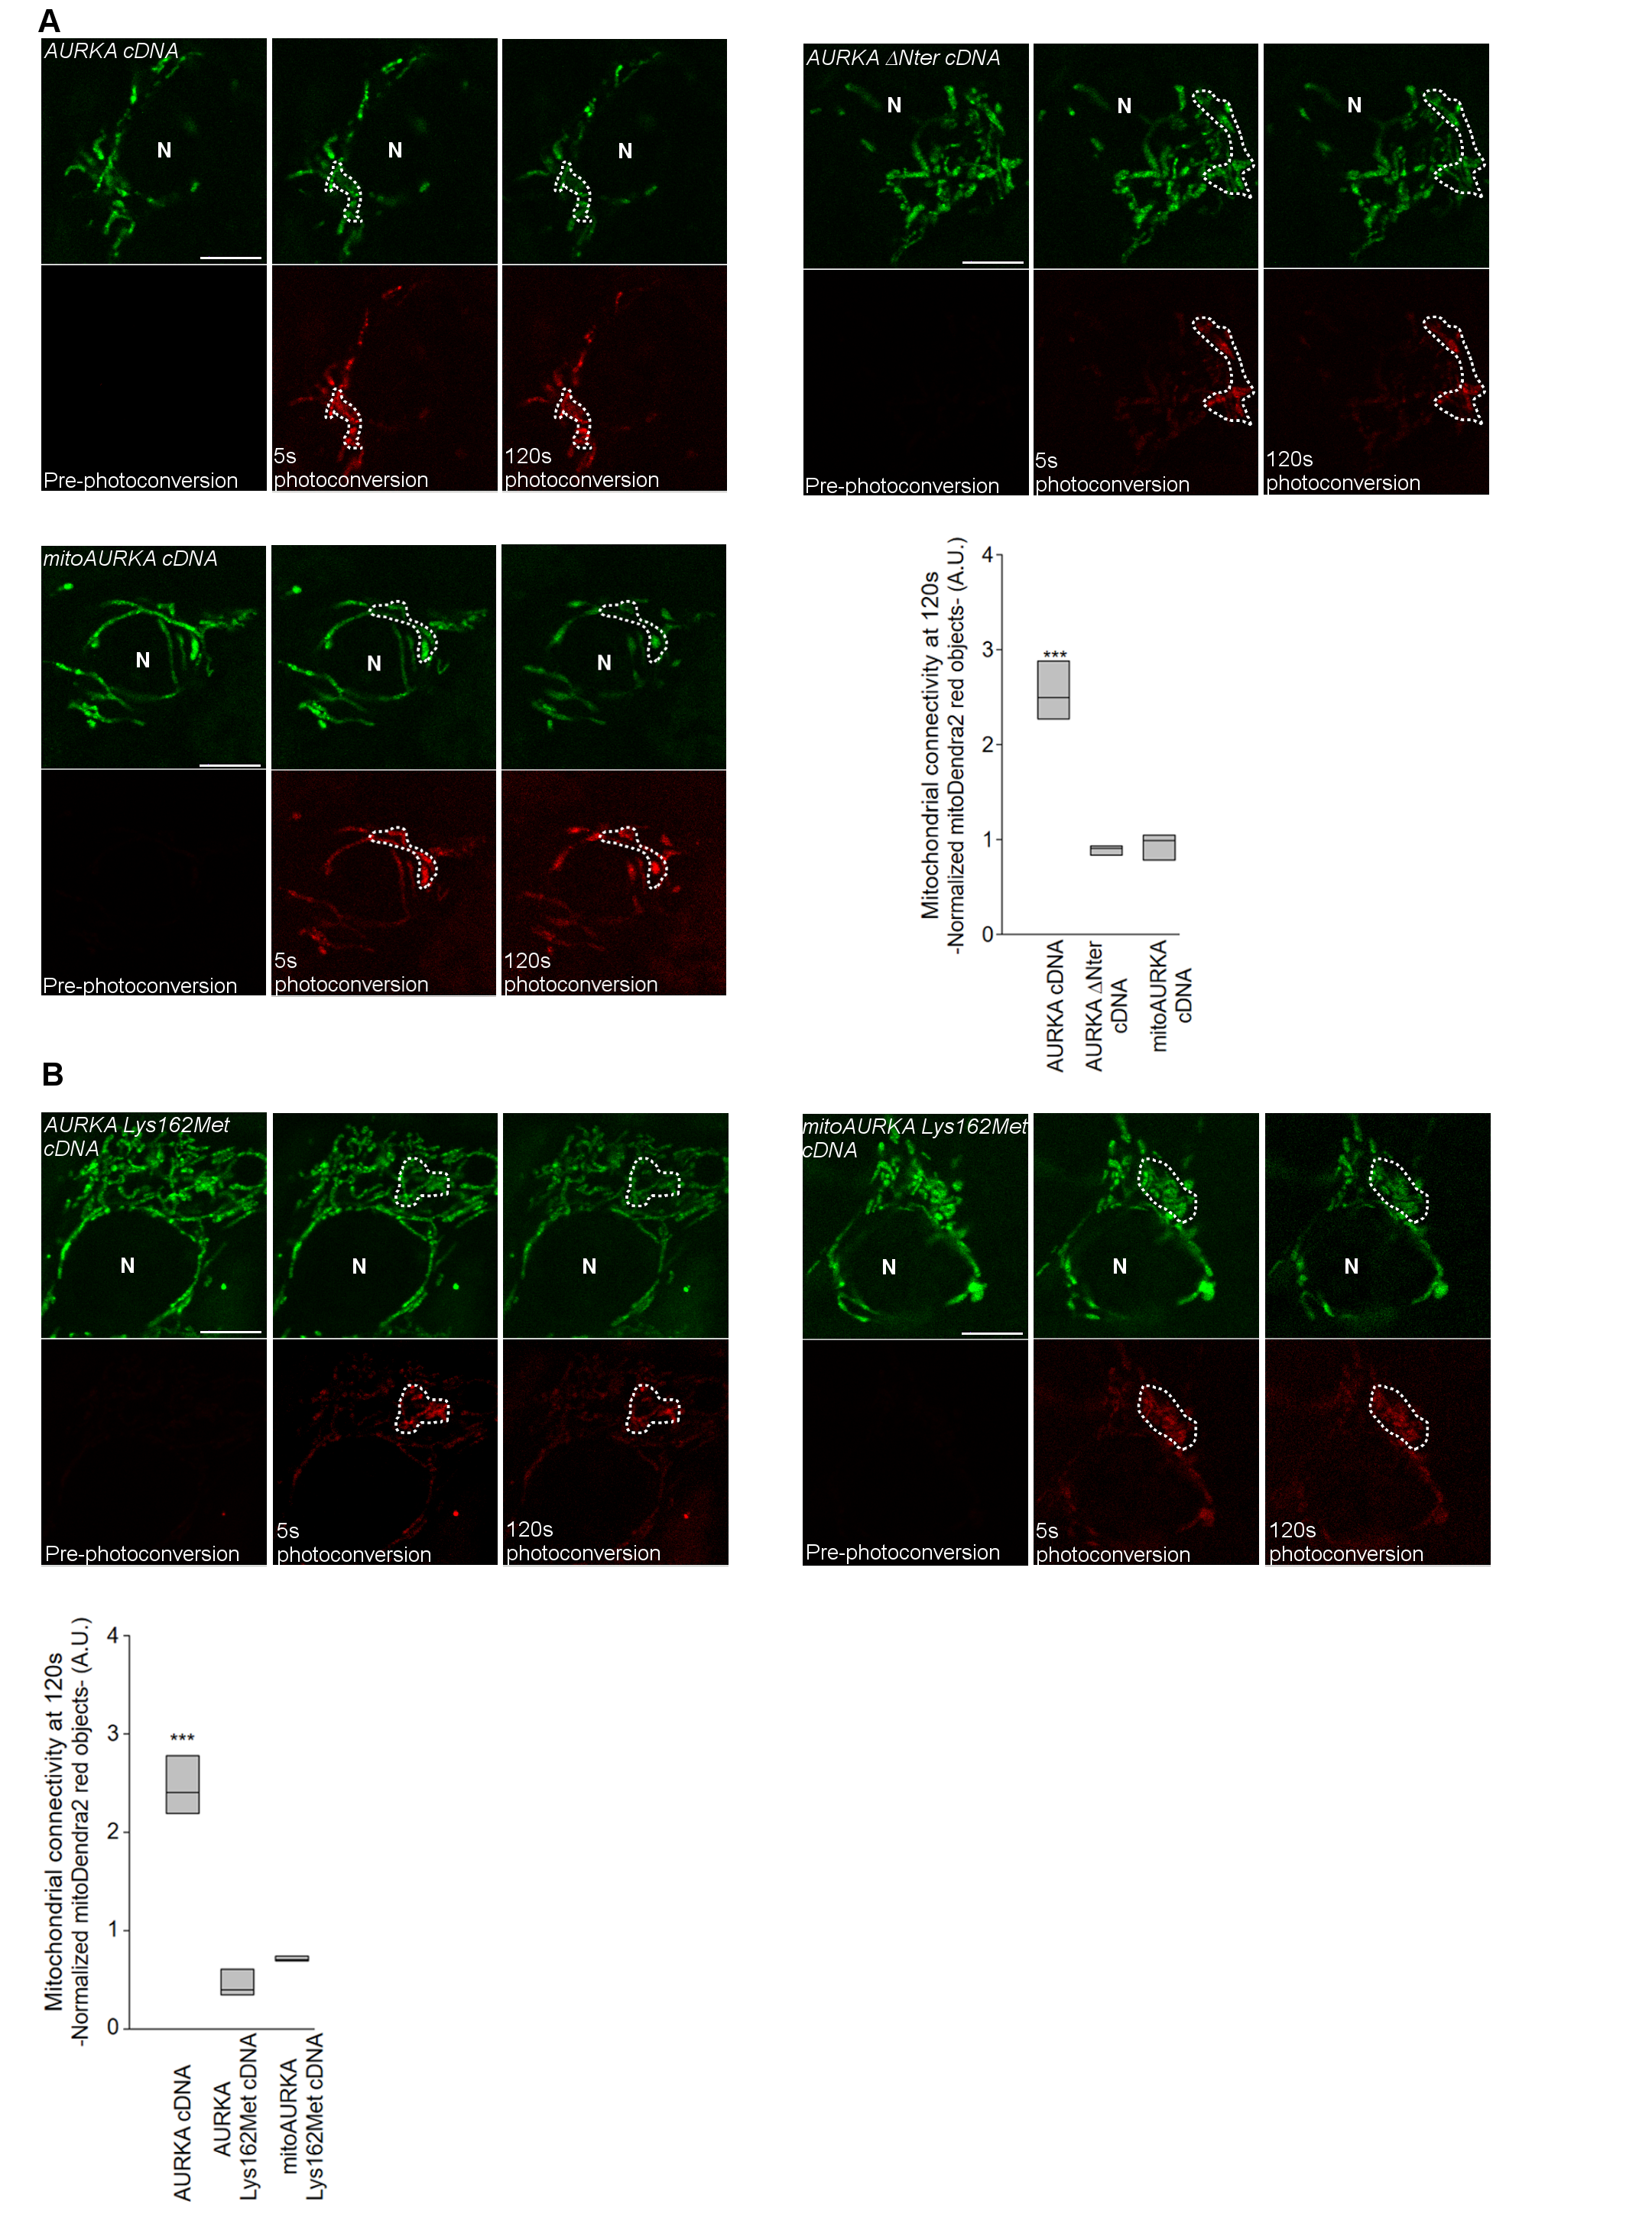

Supplement: supp [file elife-38111-supp-v1.zip › elife_poa_e38111_Figure_3_figure_supplement_2.tif]
